# Supplementary material for: Photoinduced copper-catalyzed asymmetric radical three-component cross-coupling of 1,3-enynes with oxime esters and carboxylic acids
Source: Royal Society of Chemistry journal article supplement (doi:10.1039/d3qo00513e), 2023-01-01
Supplement: d3qo00513e1.pdf [file d3qo00513e1.pdf]

*Supporting Information for*

**Photoinduced copper-catalyzed asymmetric radical  
three-component cross-coupling of 1,3-enynes with oxime esters  
and carboxylic acids**

Guo-Qing Li,<sup>a</sup> Fan-Rong Meng,<sup>a</sup> Wen-Jing Xiao<sup>a</sup> and Jia-Rong Chen<sup>a,b,c\*</sup>

<sup>a</sup> College of Chemistry, Central China Normal University, 152 Luoyu Road, Wuhan, Hubei 430079, China.

<sup>b</sup> Key Laboratory of Organo-Pharmaceutical Chemistry of Jiangxi Province, Gannan Normal University, Ganzhou 341000, China

<sup>c</sup> School of Chemistry and Chemical Engineering, Henan Normal University, Xinxiang, Henan 453007, China

Email: chenjiarong@mail.ccnuc.edu.cn

## Table of Contents

|                                                                            |            |
|----------------------------------------------------------------------------|------------|
| <b>1. General Information</b> .....                                        | <b>S2</b>  |
| <b>2. Preparation of Materials</b> .....                                   | <b>S3</b>  |
| <b>3. Details for Condition Optimizations</b> .....                        | <b>S3</b>  |
| <b>4. General Procedure and Characterization Data of Products</b> .....    | <b>S6</b>  |
| 4.1 General procedure (with product <b>4aa</b> as an example) .....        | <b>S6</b>  |
| 4.2 Characterization data of products .....                                | <b>S6</b>  |
| <b>5. Synthetic Applications of the Reaction</b> .....                     | <b>S20</b> |
| 5.1 Gram-scale reaction .....                                              | <b>S20</b> |
| <b>6. Mechanistic Investigation</b> .....                                  | <b>S20</b> |
| 6.1 Radical trapping experiments .....                                     | <b>S20</b> |
| 6.2 Non-linear effect experiments .....                                    | <b>S21</b> |
| 6.3 UV-Vis absorption spectra of the reaction components .....             | <b>S22</b> |
| <b>7. Determination of the Absolute Configuration of Product 5cc</b> ..... | <b>S23</b> |
| <b>8. Copies of NMR Spectra</b> .....                                      | <b>S24</b> |
| <b>9. Copies of HPLC Chromatograms</b> .....                               | <b>S93</b> |

## 1. General Information

**NMR spectra:**  $^1\text{H}$  NMR spectra were recorded on a 400 MHz spectrometer. Chemical shifts are reported in parts per million (ppm) and the spectra are calibrated to the resonance resulting from incomplete deuteration of the solvent ( $\text{CDCl}_3$ : 7.26 ppm).  $^{13}\text{C}$  NMR spectra were recorded on 400 MHz spectrometer with complete proton decoupling. Chemical shifts are reported in ppm with the solvent resonance as the internal standard ( $^{13}\text{C}\text{CDCl}_3$ : 77.0 ppm, t). Data are reported as follows: chemical shift  $\delta$ /ppm, integration ( $^1\text{H}$  only), multiplicity (s = singlet, d = doublet, t = triplet, q = quartet, m = multiplet or combinations thereof;  $^{13}\text{C}$  signals are singlets unless otherwise stated), coupling constants  $J$  in Hz, assignment.  $^{19}\text{F}$  NMR spectra were recorded on the same Spectrometer. All air- and moisture-sensitive reactions were performed under an atmosphere of Ar in fire dried glassware.

**High Resolution Mass Spectrometry (HRMS):** All were recorded on Bruker micrOTOF II ESI-TOF using a positive electrospray ionization ( $\text{ESI}^+$ ). Measured values are reported to 4 decimal places of the calculated value. The calculated values are based on the most abundant isotope.

**Chromatography:** Analytical thin layer chromatography was performed using Qingdao Puke Parting Materials Co. silica gel plates (Silicagel 60 F254). Visualisation was by ultraviolet fluorescence ( $\lambda = 254$  nm) and/or staining with Phosphomolybdic acid or potassium permanganate ( $\text{KMnO}_4$ ). Flash column chromatography was performed using 200-300 mesh silica gel. Optical rotations were measured with a polarimeter.  $[\alpha]_D$  values are reported at a given temperature ( $^\circ\text{C}$ ) in degrees  $\text{cm}^2 \cdot \text{g}^{-1}$  with concentration in g/100 mL.

**Chiral HPLC analysis:** Enantiomeric ratio (ee) values were determined by chiral HPLC with chiral IG, OD, OX, AZ and AD columns with hexane and *i*-PrOH as solvents.

**UV/Vis:** Measurements were made with Agilent Cary 60 UV-Vis spectrophotometer.

**Stern-Volmer quenching studies:** Fluorescence spectra was collected on Agilent Fluorescence Spectrophotometer G9800AS24.

**Photoreactor:** The photoreactors used in this research were bought from GeAo Chem (Figure S1: purple LEDs, light intensity =  $15.2 \text{ mw/cm}^2$ , 1 W for every light bulb; every two Schlenk tube was irradiated by 6 light bulbs from the side). Gram-scale reaction was performed under irradiation of purple LEDs (Kessil PR160L-390 nm), which is bought from Anhui Kemi Machinery Technology Co., Ltd. (<http://www.kemiyiqi.com/>).

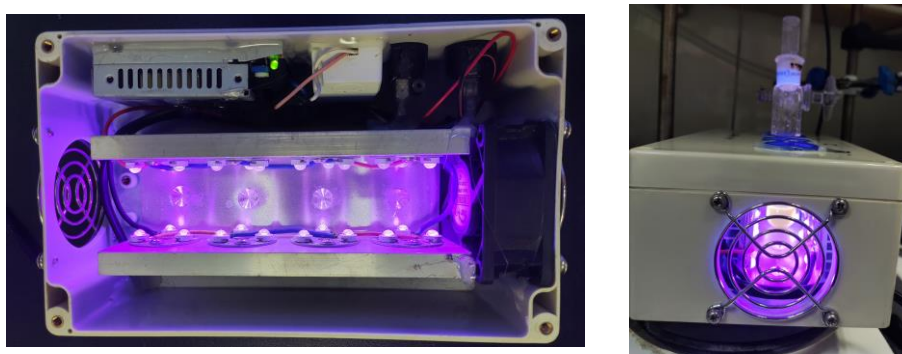

**Figure S1.** Photoreactor used in this research (4 x 6 W purple LEDs)

**Note:** All photos in this material were taken by the first author Guo-Qing Li.

## 2. Preparation of Materials

Reagents, unless otherwise stated, were used as supplied from commercial sources without further purification. Anhydrous solvent (DMF, DCM, CH<sub>3</sub>CN, MeOH, toluene and THF) were taken from JC-Meyer solvent purification system. Anhydrous DMA, DCE, EtOAc and 1,4-dioxane were purchased from J&K reagent company.

All 1,3-enynes were prepared from alkynes and vinyl bromide according to the reported literature.<sup>1</sup>

Oxime esters **2a-2f** were prepared from the corresponding ketones by following the literature report.<sup>2</sup>

Ligands **L1-L6**, **L8**, **L9** and **L12-L16** were purchased from Bide Pharmatech. **L7**<sup>3</sup>, **L10**<sup>4</sup>, **L11**<sup>4</sup> and **L17**<sup>5</sup> were prepared according to the reported literature.

## 3. Details for Condition Optimizations

**Table S1** The effect of solvents<sup>[a]</sup>

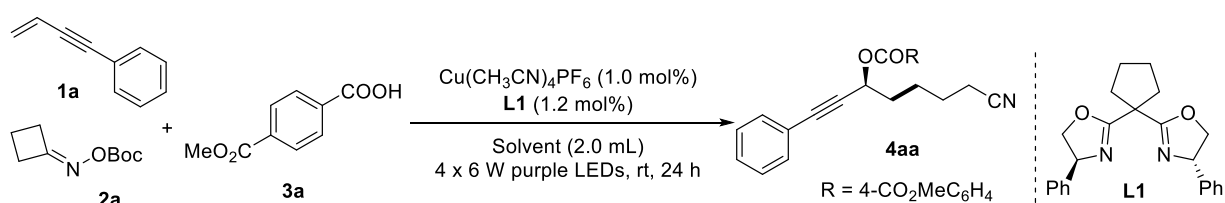

| Entry | Solvent            | Yield [%] <sup>[b]</sup> | ee [%] <sup>[c]</sup> |
|-------|--------------------|--------------------------|-----------------------|
| 1     | THF                | Trace                    | -                     |
| 2     | DCM                | 33                       | 34                    |
| 3     | MeOH               | 43                       | 8                     |
| 4     | CH <sub>3</sub> CN | 53                       | 31                    |
| 5     | DMF                | 24                       | 7                     |
| 6     | Toluene            | Trace                    | -                     |
| 7     | EtOAc              | Trace                    | -                     |
| 8     | DME                | 13                       | 0                     |
| 9     | DCE                | <b>63</b>                | <b>60</b>             |

<sup>[a]</sup> **1a** (0.3 mmol), **2a** (0.2 mmol), **3a** (1.0 equiv, 0.1 mmol), Cu(CH<sub>3</sub>CN)<sub>4</sub>PF<sub>6</sub> (0.001 mmol, 1.0 mol%) and chiral ligand **L1** (0.0012 mmol, 1.2 mol%) in 2.0 mL solvent for 24h under the irradiation of 4 x 6 W purple LEDs. <sup>[b]</sup> NMR yield determined by using 1,3,5-trimethoxybenzene as an internal standard. <sup>[c]</sup> Determined by chiral HPLC.

As shown in **Table S1**, among all the tested, DCE (2.0 mL) gave the best results (63% yield, 60% ee), and was thus selected for further optimization studies.

**Table S2.** The effect of copper salts<sup>[a]</sup>

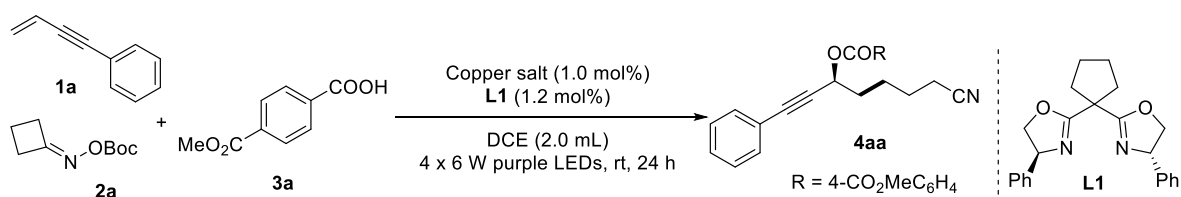



| Entry    | Copper Salt                                           | Yield [%] <sup>[b]</sup> | ee [%] <sup>[c]</sup> |
|----------|-------------------------------------------------------|--------------------------|-----------------------|
| 1        | CuOAc                                                 | 10                       | 12                    |
| 2        | CuCl                                                  | 53                       | 6                     |
| 3        | CuBr                                                  | 48                       | 31                    |
| 4        | CuOTf                                                 | 5                        | 29                    |
| 5        | CuCN                                                  | 8                        | 0                     |
| 6        | CuSCN                                                 | 13                       | 6                     |
| 7        | CuTc                                                  | 50                       | 0                     |
| 8        | Cu(OTf) <sub>2</sub>                                  | 54                       | 58                    |
| <b>9</b> | <b>Cu(CH<sub>3</sub>CN)<sub>4</sub>PF<sub>6</sub></b> | <b>63</b>                | <b>60</b>             |

<sup>[a]</sup> **1a** (0.3 mmol), **2a** (0.2 mmol), **3a** (1.0 equiv, 0.1 mmol), copper salt (0.001 mmol, 1.0 mol%) and chiral ligand **L1** (0.0012 mmol, 1.2 mol%) in 2.0 mL DCE for 8 h under the irradiation of 4 x 6 W purple LEDs. <sup>[b]</sup> NMR yield determined by using 1,3,5-trimethoxybenzene as an internal standard. <sup>[c]</sup> Determined by chiral HPLC.

As shown in **Table S2**, among all the tested, Cu(CH<sub>3</sub>CN)<sub>4</sub>PF<sub>6</sub> gave the best results (63% yield, 60% ee), and was thus selected for further optimization studies..

**Table S3. The effect of temperature and catalyst loading<sup>[a]</sup>**

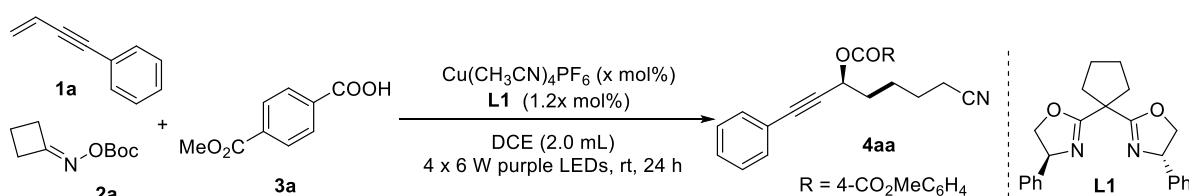

| Entry | Conditions                             | Yield [%] <sup>[b]</sup> | ee [%] <sup>[c]</sup> |
|-------|----------------------------------------|--------------------------|-----------------------|
| 1     | with 1.0 mol% [Cu], 1.2 mol% <b>L1</b> | 63                       | 60                    |
| 2     | with 2.0 mol% [Cu], 2.4 mol% <b>L1</b> | <b>80</b>                | <b>63</b>             |
| 3     | with 5.0 mol% [Cu], 6.0 mol% <b>L1</b> | 81                       | 60                    |

<sup>[a]</sup> **1a** (0.3 mmol), **2a** (0.2 mmol), **3a** (1.0 equiv, 0.1 mmol), Cu(CH<sub>3</sub>CN)<sub>4</sub>PF<sub>6</sub> (0.00x mmol, x mol%) and chiral ligand **L1** (0.0012x mmol, 1.2x mol%) in 2.0 mL DCE for 24 h under the irradiation of 4 x 6 W purple LEDs. <sup>[b]</sup> NMR yield determined by using 1,3,5-trimethoxybenzene as an internal standard. <sup>[c]</sup> Determined by chiral HPLC.

As shown in **Table S3**, among all the tested, a combination of Cu(CH<sub>3</sub>CN)<sub>4</sub>PF<sub>6</sub> (2.0 mol%) and chiral ligand **L1** (2.4 mol%) gave the best results (80% yield, 63% ee), and was thus selected for further studies.

**Table S4. The effect of chiral ligands<sup>[a,b,c]</sup>**

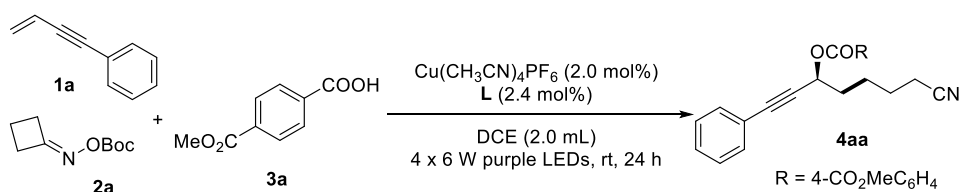

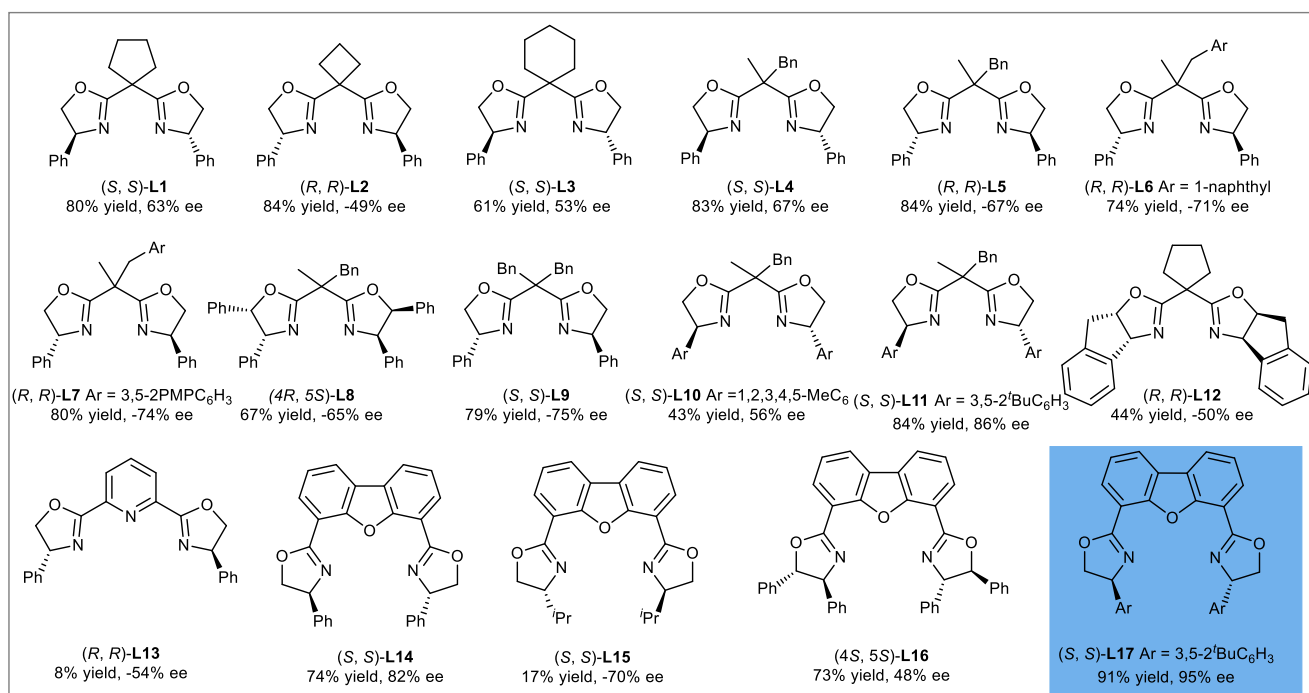

<sup>[a]</sup> **1a** (0.3 mmol), **2a** (0.2 mmol), **3a** (1.0 equiv, 0.1 mmol), Cu(CH<sub>3</sub>CN)<sub>4</sub>PF<sub>6</sub> (0.002 mmol, 2.0 mol%) and chiral ligand **L** (0.0024 mmol, 2.4 mol%) in 2.0 mL DCE for 24 h under the irradiation of 4 x 6 W purple LEDs. <sup>[b]</sup> NMR yield determined by using 1,3,5-trimethoxybenzene as an internal standard. <sup>[c]</sup> Determined by chiral HPLC.

As shown in **Table S4**, among all the tested, chiral ligand **L17** (2.4 mol%) gave the best results (91% yield, 95% ee), and was thus selected for further optimization studies.

**Table S5. Control experiments**<sup>[a]</sup>

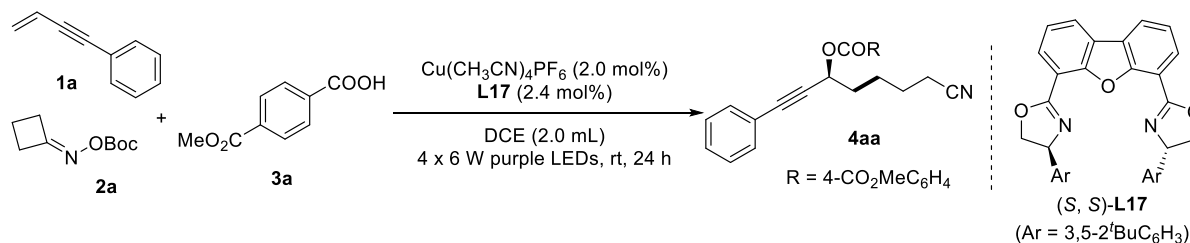

| Entry            | <i>hν</i> | Cu(CH <sub>3</sub> CN) <sub>4</sub> PF <sub>6</sub> | <b>L17</b> | Yield [%] <sup>[b]</sup> | ee [%] <sup>[c]</sup> |
|------------------|-----------|-----------------------------------------------------|------------|--------------------------|-----------------------|
| 1 <sup>[d]</sup> | ×         | √                                                   | √          | 17                       | 95                    |
| 2 <sup>[e]</sup> | √         | ×                                                   | √          | N.R.                     | -                     |
| 3 <sup>[f]</sup> | √         | √                                                   | ×          | 11                       | -                     |
| <b>4</b>         | √         | √                                                   | √          | <b>91 (90)</b>           | <b>95</b>             |

<sup>[a]</sup> **1a** (0.3 mmol), **2a** (0.2 mmol), **3a** (1.0 equiv, 0.1 mmol), Cu(CH<sub>3</sub>CN)<sub>4</sub>PF<sub>6</sub> (0.005 mmol, 2.0 mol%) and chiral ligand **L17** (0.0024 mmol, 2.4 mol%) in 2.0 mL DCE for 24 h under the irradiation of 4 x 6 W purple LEDs. <sup>[b]</sup> NMR yield determined by using 1,3,5-trimethoxybenzene as an internal standard. Value in parentheses is isolated yield. <sup>[c]</sup> Determined by chiral HPLC. <sup>[d]</sup> Without the irradiation. <sup>[e]</sup> Without the copper salt. <sup>[f]</sup> Without the ligand. N.R. = no reaction.

The results of **Table S5** reveal that each component is essential for the reaction.

## 4. General Procedure and Characterization Data of Products

### 4.1 General procedure (with product **4aa** as an example)

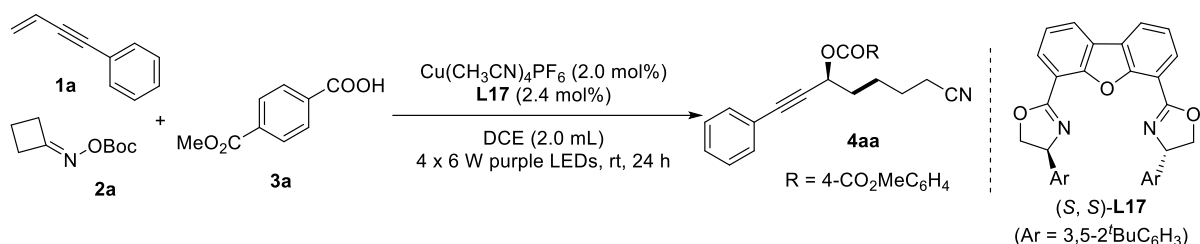

In a flame-dried 10 mL Schlenk tube equipped with a magnetic stirrer bar was charged sequentially with  $\text{Cu}(\text{CH}_3\text{CN})_4\text{PF}_6$  (0.75 mg, 0.002 mmol) and chiral ligand **L17** (1.64 mg, 0.0024 mmol), followed by the addition of DCE (2.0 mL). Then the mixture was stirred at room temperature for 30 min. To the resulting mixture, **3a** (18.0 mg, 0.10 mmol), **1a** (38.4 mg, 0.30 mmol) and **2a** (37.0 mg, 0.20 mmol) were added. Then, the resulting mixture was degassed (3 times) under argon atmosphere. At last, the mixture was stirred at a distance of ~1 cm from 4 x 6 W purple LEDs at room temperature for 24 h. The product was purified by flash column chromatography on silica gel to afford the desired product with petroleum ether and ethyl acetate (7:1, v/v) in 90% yield and 95% ee.

Note: The racemic samples were prepared according to the general procedure by replacing the chiral ligand with racemic ligand **L1** (by mixing equal parts *R*-**L1** and *S*-**L1**).

### 4.2 Characterization data of products

#### (*S*)-7-cyano-1-phenylhept-1-yn-3-yl methyl terephthalate **4aa**

90% isolated yield (33.8 mg), colorless oil,  $[\alpha]_{\text{D}}^{25} = 63.44$  ( $c = 0.5$  in  $\text{CHCl}_3$ ); 95% ee, determined by HPLC analysis (Chiralpak OD column, hexane/*i*-PrOH, 80:20 v/v, flow rate 1.0 mL/min,  $\lambda = 254$  nm, 25 °C),  $t_{\text{R}}$  (major) = 19.38 min,  $t_{\text{R}}$  (minor) = 27.22 min.  $^1\text{H NMR}$  (400 MHz,  $\text{CDCl}_3$ )  $\delta$  (ppm) 8.16 – 8.10 (m, 4H), 7.47 – 7.44 (m, 2H), 7.34 – 7.29 (m, 3H), 5.89 (t,  $J = 6.3$  Hz, 1H), 3.94 (s, 3H), 2.44 – 2.38 (m, 2H), 2.06 – 2.04 (m, 2H), 1.82 – 1.76 (m, 4H).  $^{13}\text{C NMR}$  (100 MHz,  $\text{CDCl}_3$ )  $\delta$  (ppm) 166.1, 164.6, 134.1, 133.5, 131.8, 129.7, 129.5, 128.8, 128.2, 121.8, 119.3, 86.2, 85.5, 65.0, 52.4, 34.0, 24.9, 24.2, 17.0. HRMS (EI):  $m/z$   $[\text{M} + \text{Na}]^+$  calcd for  $\text{C}_{23}\text{H}_{21}\text{NNaO}_4$ : 398.1363, found: 398.1364.

#### (*S*)-7-cyano-1-(*p*-tolyl)hept-1-yn-3-yl methyl terephthalate **4ba**

78% isolated yield (30.4 mg), colorless oil,  $[\alpha]_{\text{D}}^{25} = 25.73$  ( $c = 0.5$  in  $\text{CHCl}_3$ ); 85% ee, determined by HPLC analysis (Chiralpak OD column, hexane/*i*-PrOH, 80:20 v/v, flow rate 1.0 mL/min,  $\lambda = 254$  nm, 25 °C),  $t_{\text{R}}$  (major) = 14.89 min,  $t_{\text{R}}$  (minor) = 22.24 min.  $^1\text{H NMR}$  (400 MHz,  $\text{CDCl}_3$ )  $\delta$  (ppm) 8.17 – 8.09 (m, 4H), 7.35 (d,  $J = 7.9$  Hz, 2H), 7.11 (d,  $J = 7.9$  Hz, 2H), 5.88 (t,  $J = 6.3$  Hz, 1H), 3.94 (s, 3H), 2.49 – 2.38 (m, 2H), 2.33 (s, 3H), 2.05 – 2.04 (m, 2H), 1.83 – 1.75 (m, 4H).  $^{13}\text{C NMR}$  (100 MHz,  $\text{CDCl}_3$ )  $\delta$  (ppm) 166.1, 164.7, 139.0, 134.1, 133.5, 131.8, 129.7, 129.5, 129.0, 119.3, 118.7, 86.3, 84.8, 65.1, 52.4, 34.1, 24.9, 24.2, 21.4, 17.1. HRMS (EI):  $m/z$   $[\text{M} + \text{Na}]^+$  calcd for  $\text{C}_{24}\text{H}_{23}\text{NNaO}_4$ : 412.1519, found: 412.1518.

#### (*S*)-7-cyano-1-(4-methoxyphenyl)hept-1-yn-3-yl methyl terephthalate **4ca**

90% isolated yield (36.5 mg), colorless oil,  $[\alpha]_{\text{D}}^{25} = 63.00$  ( $c = 0.5$  in  $\text{CHCl}_3$ ); 89% ee, determined by HPLC analysis (Chiralpak OD column, hexane/*i*-PrOH, 80:20 v/v, flow rate 1.0 mL/min,  $\lambda = 254$  nm, 25 °C),  $t_{\text{R}}$  (major) = 29.83 min,  $t_{\text{R}}$  (minor) = 35.90 min.  $^1\text{H NMR}$  (400 MHz,  $\text{CDCl}_3$ )  $\delta$  (ppm) 8.16 – 8.08 (m, 4H), 7.42 – 7.36 (m, 2H), 6.85 – 6.79 (m, 2H),

5.87 (t,  $J = 6.3$  Hz, 1H), 3.94 (s, 3H), 3.79 (s, 3H), 2.42 – 2.39 (m, 2H), 2.09 – 1.99 (m, 2H), 1.83 – 1.73 (m, 4H).  $^{13}\text{C}$  NMR (100 MHz,  $\text{CDCl}_3$ )  $\delta$  (ppm) 166.1, 164.7, 159.9, 134.0, 133.5, 133.4, 129.7, 129.5, 119.3, 113.9, 113.8, 86.2, 84.1, 65.1, 55.2, 52.4, 34.1, 24.9, 24.2, 17.1. HRMS (EI):  $m/z$   $[\text{M} + \text{Na}]^+$  calcd for  $\text{C}_{24}\text{H}_{23}\text{NNaO}_5$ : 428.1468, found: 428.1466.

**(S)-7-cyano-1-(4-propylphenyl)hept-1-yn-3-yl methyl terephthalate 4da**

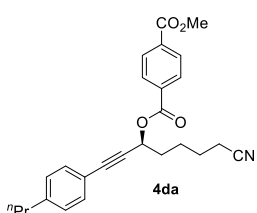

89% isolated yield (37.5 mg), colorless oil,  $[\alpha]_{\text{D}}^{25} = 21.47$  ( $c = 0.5$  in  $\text{CHCl}_3$ ); 90% ee, determined by HPLC analysis (Chiralpak OD column, hexane/*i*-PrOH, 80:20 v/v, flow rate 1.0 mL/min,  $\lambda = 254$  nm, 25 °C),  $t_{\text{R}}$  (major) = 12.44 min,  $t_{\text{R}}$  (minor) = 18.36 min.  $^1\text{H}$  NMR (400 MHz,  $\text{CDCl}_3$ )  $\delta$  (ppm) 8.17 – 8.07 (m, 4H), 7.37 (d,  $J = 8.0$  Hz, 2H), 7.11 (d,  $J = 7.9$  Hz, 2H), 5.88 (t,  $J = 6.3$  Hz, 1H), 3.94 (s, 3H), 2.56 (t,  $J = 7.6$  Hz, 2H), 2.40 – 2.39 (m, 2H), 2.07 – 2.02 (m, 2H), 1.84 – 1.74 (m, 4H), 1.64 – 1.58 (m, 2H), 0.91 (t,  $J = 7.3$  Hz, 3H).  $^{13}\text{C}$  NMR (100 MHz,  $\text{CDCl}_3$ )  $\delta$  (ppm) 166.1, 164.7, 143.8, 134.1, 133.5, 131.8, 129.7, 129.5, 128.4, 119.3, 119.0, 86.4, 84.8, 65.1, 52.4, 37.9, 34.1, 25.0, 24.2, 17.1, 13.7. HRMS (EI):  $m/z$   $[\text{M} + \text{Na}]^+$  calcd for  $\text{C}_{26}\text{H}_{27}\text{NNaO}_4$ : 440.1832, found: 440.1831.

**(S)-1-(4-(tert-butyl)phenyl)-7-cyanohept-1-yn-3-yl methyl terephthalate 4ea**

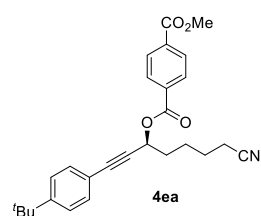

85% isolated yield (36.7 mg), colorless oil,  $[\alpha]_{\text{D}}^{25} = 50.01$  ( $c = 0.5$  in  $\text{CHCl}_3$ ); 92% ee, determined by HPLC analysis (Chiralpak OD column, hexane/*i*-PrOH, 80:20 v/v, flow rate 0.5 mL/min,  $\lambda = 254$  nm, 25 °C),  $t_{\text{R}}$  (major) = 9.65 min,  $t_{\text{R}}$  (minor) = 11.51 min.  $^1\text{H}$  NMR (400 MHz,  $\text{CDCl}_3$ )  $\delta$  (ppm) 8.17 – 8.09 (m, 4H), 7.39 (d,  $J = 8.5$  Hz, 2H), 7.35 – 7.30 (m, 2H), 5.88 (t,  $J = 6.3$  Hz, 1H), 3.95 (s, 3H), 2.40 (t,  $J = 4.4$  Hz, 2H), 2.09 – 1.98 (m, 2H), 1.83 – 1.79 (m, 4H), 1.29 (s, 9H).  $^{13}\text{C}$  NMR (100 MHz,  $\text{CDCl}_3$ )  $\delta$  (ppm) 166.2, 164.7, 152.1, 134.1, 133.5, 131.6, 129.7, 129.5, 125.8, 119.5, 118.8, 86.4, 84.8, 65.1, 52.4, 34.8, 34.1, 31.1, 25.0, 24.2, 17.1. HRMS (EI):  $m/z$   $[\text{M} + \text{Na}]^+$  calcd for  $\text{C}_{27}\text{H}_{29}\text{NNaO}_4$ : 454.1989, found: 454.1986.

**(S)-1-([1,1'-biphenyl]-4-yl)-7-cyanohept-1-yn-3-yl methyl terephthalate 4fa**

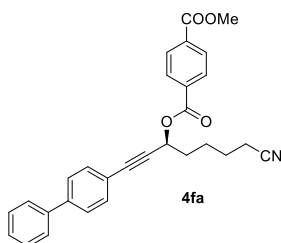

81% isolated yield (36.5 mg), colorless oil,  $[\alpha]_{\text{D}}^{25} = 77.30$  ( $c = 0.5$  in  $\text{CHCl}_3$ ); 95% ee, determined by HPLC analysis (Chiralpak OD column, hexane/*i*-PrOH, 80:20 v/v, flow rate 1.0 mL/min,  $\lambda = 254$  nm, 25 °C),  $t_{\text{R}}$  (major) = 20.61 min,  $t_{\text{R}}$  (minor) = 36.91 min.  $^1\text{H}$  NMR (400 MHz,  $\text{CDCl}_3$ )  $\delta$  (ppm) 8.18 – 8.12 (m, 4H), 7.58 (d,  $J = 8.3$  Hz, 2H), 7.55 (s, 4H), 7.46 – 7.42 (m, 2H), 7.36 (t,  $J = 7.4$  Hz, 1H), 5.92 (t,  $J = 6.3$  Hz, 1H), 3.95 (s, 3H), 2.43 – 2.41 (m, 2H), 2.13 – 2.03 (m, 2H), 1.83–1.79 (m, 4H).  $^{13}\text{C}$  NMR (100 MHz,  $\text{CDCl}_3$ )  $\delta$  (ppm) 166.1, 164.6, 141.5, 140.0, 134.1, 133.4, 132.3, 129.7, 129.5, 128.8, 127.7, 126.9, 126.9, 120.7, 119.3, 86.1, 86.0, 65.0, 52.4, 34.0, 24.9, 24.2, 17.0. HRMS (EI):  $m/z$   $[\text{M} + \text{Na}]^+$  calcd for  $\text{C}_{29}\text{H}_{25}\text{NNaO}_4$ : 474.1676, found: 474.1673.

**(S)-7-cyano-1-(4-fluorophenyl)hept-1-yn-3-yl methyl terephthalate 4ga**

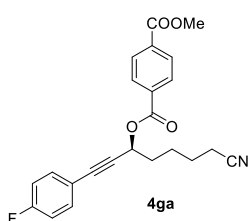

94% isolated yield (37.0 mg), colorless oil,  $[\alpha]_{\text{D}}^{25} = 16.90$  ( $c = 0.5$  in  $\text{CHCl}_3$ ); 93% ee, determined by HPLC analysis (Chiralpak OD column, hexane/*i*-PrOH, 80:20 v/v, flow rate 1.0 mL/min,  $\lambda = 254$  nm, 25 °C),  $t_{\text{R}}$  (major) = 13.06 min,  $t_{\text{R}}$  (minor) = 22.43 min.  $^1\text{H}$  NMR (400 MHz,  $\text{CDCl}_3$ )  $\delta$  (ppm) 8.15 – 8.08 (m, 4H), 7.43 (m, 2H), 6.99 (t,  $J = 8.7$  Hz, 2H), 5.85 (t,  $J = 6.3$  Hz, 1H), 3.93 (s, 3H), 2.41 (m, 2H), 2.07 – 1.96 (m, 2H), 1.81 – 1.75 (m, 4H).  $^{13}\text{C}$  NMR (100 MHz,  $\text{CDCl}_3$ )  $\delta$  (ppm) 166.1, 164.6, 162.7 (d,  $J = 250.2$  Hz), 134.1, 133.8 (d,  $J = 8.5$  Hz), 133.4, 129.6 (d,  $J = 15.9$  Hz), 119.3, 117.9, 117.9, 115.5 (d,  $J = 22.2$  Hz), 85.2, 85.1, 64.9, 52.4, 33.9, 24.9, 24.1, 17.0.  $^{19}\text{F}$  NMR (376 MHz,  $\text{CDCl}_3$ )  $\delta$  (ppm) -109.9. HRMS (EI):  $m/z$   $[\text{M} + \text{Na}]^+$  calcd for  $\text{C}_{23}\text{H}_{20}\text{ClNNaO}_4$ : 416.1269, found: 416.1266.

**(S)-1-(4-chlorophenyl)-7-cyanohept-1-yn-3-yl methyl terephthalate 4ha**

80% isolated yield (32.7 mg), colorless oil,  $[\alpha]_{\text{D}}^{25} = 21.23$  ( $c = 0.5$  in  $\text{CHCl}_3$ ); 96% ee, determined by HPLC analysis

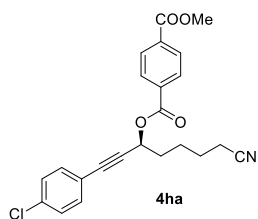

(Chiralpak OD column, hexane/*i*-PrOH, 80:20 v/v, flow rate 1.0 mL/min,  $\lambda = 254$  nm, 25 °C),  $t_R$  (major) = 14.51 min,  $t_R$  (minor) = 23.91 min.  $^1\text{H NMR}$  (400 MHz,  $\text{CDCl}_3$ )  $\delta$  (ppm) 8.18 – 8.13 (m, 4H), 7.44 – 7.38 (m, 2H), 7.32 – 7.29 (m, 2H), 5.89 (t,  $J = 6.3$  Hz, 1H), 3.97 (s, 3H), 2.47 – 2.42 (m, 2H), 2.10-2.05 (m, 2H), 1.83 - 1.79 (m, 4H).  $^{13}\text{C NMR}$  (100 MHz,  $\text{CDCl}_3$ )  $\delta$  (ppm) 166.1, 164.6, 134.8, 134.1, 133.3, 133.1, 129.67, 129.5, 128.6, 120.3, 119.3, 86.4, 85.0, 64.8, 52.4, 33.9, 24.9, 24.2, 17.1. HRMS (EI):  $m/z$   $[\text{M} + \text{Na}]^+$  calcd for  $\text{C}_{23}\text{H}_{20}\text{ClNNaO}_4$ : 432.0973, found: 432.0970.

**(S)-7-cyano-1-(4-(trifluoromethyl)phenyl)hept-1-yn-3-yl methyl terephthalate 4ia**

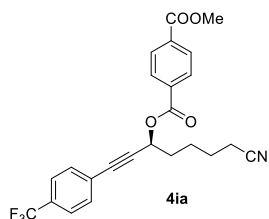

82% isolated yield (36.3 mg), colorless oil,  $[\alpha]_D^{25} = 20.03$  ( $c = 0.5$  in  $\text{CHCl}_3$ ); 96% ee, determined by HPLC analysis (Chiralpak IG column, hexane/*i*-PrOH, 80:20 v/v, flow rate 1.0 mL/min,  $\lambda = 220$  nm, 25 °C),  $t_R$  (minor) = 20.08 min,  $t_R$  (major) = 26.69 min.  $^1\text{H NMR}$  (400 MHz,  $\text{CDCl}_3$ )  $\delta$  (ppm) 8.18 – 8.10 (m, 4H), 7.57 (s, 4H), 5.88 (t,  $J = 6.4$  Hz, 1H), 3.95 (s, 3H), 2.44 – 2.41 (m, 2H), 2.10 -2.04 (m, 2H), 1.84 – 1.76 (m, 4H).  $^{13}\text{C NMR}$  (100 MHz,  $\text{CDCl}_3$ )  $\delta$  (ppm) 166.4, 164.7, 134.3, 133.3, 132.1, 130.5 (d,  $J = 32.7$  Hz), 129.7 (d,  $J = 14.6$  Hz), 125.7, 125.2 (d,  $J = 4.0$  Hz), 119.3, 87.9, 84.8, 64.7, 52.5, 33.9, 24.9, 24.2, 17.1.  $^{19}\text{F NMR}$  (376 MHz,  $\text{CDCl}_3$ )  $\delta$  (ppm) -62.89. HRMS (EI):  $m/z$   $[\text{M} + \text{Na}]^+$  calcd for  $\text{C}_{24}\text{H}_{20}\text{F}_3\text{N}_2\text{NaO}_4$ : 466.1237, found: 466.1235.

**(S)-7-cyano-1-(4-(trifluoromethoxy)phenyl)hept-1-yn-3-yl methyl terephthalate 4ja**

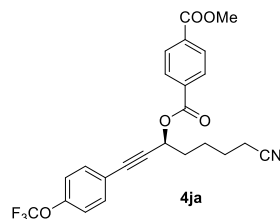

80% isolated yield (36.7 mg), colorless oil,  $[\alpha]_D^{25} = 71.00$  ( $c = 0.5$  in  $\text{CHCl}_3$ ); 92% ee, determined by HPLC analysis (Chiralpak OD column, hexane/*i*-PrOH, 80:20 v/v, flow rate 1.0 mL/min,  $\lambda = 254$  nm, 25 °C),  $t_R$  (major) = 10.28 min,  $t_R$  (minor) = 16.12 min.  $^1\text{H NMR}$  (400 MHz,  $\text{CDCl}_3$ )  $\delta$  (ppm) 8.16 – 8.09 (m, 4H), 7.48 (d,  $J = 8.3$  Hz, 2H), 7.15 (d,  $J = 8.3$  Hz, 2H), 5.87 (t,  $J = 6.3$  Hz, 1H), 3.94 (s, 3H), 2.46 – 2.39 (m, 2H), 2.08 - 2.03 (m, 2H), 1.81 – 1.77 (m, 4H).  $^{13}\text{C NMR}$  (100 MHz,  $\text{CDCl}_3$ )  $\delta$  (ppm) 166.1, 164.7, 149.3, 134.2, 133.4 (d,  $J = 11.0$  Hz), 129.7 (d,  $J = 14.5$  Hz), 120.8, 120.6, 119.3, 86.4, 84.8, 64.8, 52.4, 33.9, 24.9, 24.2, 17.1.  $^{19}\text{F NMR}$  (376 MHz,  $\text{CDCl}_3$ )  $\delta$  (ppm) -57.80. HRMS (EI):  $m/z$   $[\text{M} + \text{Na}]^+$  calcd for  $\text{C}_{24}\text{H}_{20}\text{F}_3\text{NNaO}_5$ : 482.1186, found: 482.1187.

**(S)-7-cyano-1-(4-(methoxycarbonyl)phenyl)hept-1-yn-3-yl methyl terephthalate 4ka**

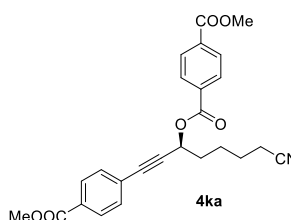

83% isolated yield (35.9 mg), colorless oil,  $[\alpha]_D^{25} = 17.77$  ( $c = 0.5$  in  $\text{CHCl}_3$ ); 90% ee, determined by HPLC analysis (Chiralpak OD column, hexane/*i*-PrOH, 80:20 v/v, flow rate 1.0 mL/min,  $\lambda = 254$  nm, 25 °C),  $t_R$  (major) = 22.76 min,  $t_R$  (minor) = 42.47 min.  $^1\text{H NMR}$  (400 MHz,  $\text{CDCl}_3$ )  $\delta$  (ppm) 8.17 – 8.09 (m, 4H), 7.97 (d,  $J = 8.1$  Hz, 2H), 7.51 (d,  $J = 8.1$  Hz, 2H), 5.88 (t,  $J = 6.3$  Hz, 1H), 3.95 (s, 3H), 3.90 (s, 3H), 2.45 – 2.38 (m, 2H), 2.08 – 2.03 (m, 2H), 1.81 – 1.77 (m, 4H).  $^{13}\text{C NMR}$  (100 MHz,  $\text{CDCl}_3$ )  $\delta$  (ppm) 166.3, 166.1, 164.6, 134.2, 133.3, 131.8, 130.1, 129.7, 129.6, 129.4, 126.5, 119.3, 88.3, 85.3, 64.8, 52.5, 52.2, 33.9, 24.9, 24.2, 17.1. HRMS (EI):  $m/z$   $[\text{M} + \text{Na}]^+$  calcd for  $\text{C}_{25}\text{H}_{23}\text{NNaO}_6$ : 456.1418, found: 456.1417.

**(S)-7-cyano-1-(*m*-tolyl)hept-1-yn-3-yl methyl terephthalate 4la**

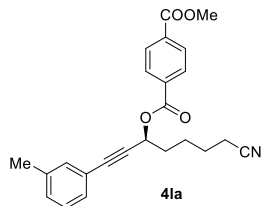

90% isolated yield (26.5 mg), colorless oil,  $[\alpha]_D^{25} = 15.47$  ( $c = 0.5$  in  $\text{CHCl}_3$ ); 93% ee, determined by HPLC analysis (Chiralpak OD column, hexane/*i*-PrOH, 80:20 v/v, flow rate 1.0 mL/min,  $\lambda = 254$  nm, 25 °C),  $t_R$  (major) = 18.07 min,  $t_R$  (minor) = 22.99 min.  $^1\text{H NMR}$  (400 MHz,  $\text{CDCl}_3$ )  $\delta$  (ppm) 8.22 – 8.14 (m, 4H), 7.33 (s, 1H), 7.30 (d,  $J = 3.3$  Hz, 1H), 7.23 (d,  $J = 7.5$  Hz, 1H), 7.18 (d,  $J = 7.7$  Hz, 1H), 5.93 (t,  $J = 6.3$  Hz, 1H), 3.99 (s, 3H), 2.49 – 2.43 (m, 2H), 2.36 (s, 3H), 2.14 – 2.04 (m, 2H), 1.85 – 1.82 (m, 4H).  $^{13}\text{C NMR}$  (100 MHz,  $\text{CDCl}_3$ )  $\delta$  (ppm) 166.1, 164.6, 138.0, 134.1, 133.5, 132.4, 129.7, 129.7, 129.5, 128.9, 128.1, 121.6, 119.3, 86.3, 85.1, 65.0, 52.4, 34.0, 24.9, 24.2, 21.1, 17.1. HRMS (EI):  $m/z$   $[\text{M} + \text{Na}]^+$  calcd for  $\text{C}_{24}\text{H}_{23}\text{NNaO}_4$ : 412.1519, found: 412.1511.

**(S)-7-cyano-1-(3-methoxyphenyl)hept-1-yn-3-yl methyl terephthalate 4ma**

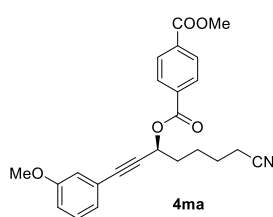

88% isolated yield (35.6 mg), colorless oil,  $[\alpha]_D^{25} = 14.53$  ( $c = 0.5$  in  $\text{CHCl}_3$ ); 96% ee, determined by HPLC analysis (Chiralpak OD column, hexane/*i*-PrOH, 80:20 v/v, flow rate 1.0 mL/min,  $\lambda = 254$  nm, 25 °C),  $t_R$  (major) = 18.03 min,  $t_R$  (minor) = 20.23 min.  $^1\text{H NMR}$  (400 MHz,  $\text{CDCl}_3$ )  $\delta$  (ppm) 8.16 – 8.08 (m, 4H), 7.20 (t,  $J = 8.0$  Hz, 1H), 7.04 (d,  $J = 7.6$  Hz, 1H), 6.98 – 6.97 (m, 1H), 6.89 – 6.85 (m, 1H), 5.87 (t,  $J = 6.3$  Hz, 1H), 3.93 (s, 3H), 3.77 (s, 3H), 2.45 – 2.38 (m, 2H), 2.10 – 1.99 (m, 2H), 1.80 – 1.76 (m, 4H).  $^{13}\text{C NMR}$  (100 MHz,  $\text{CDCl}_3$ )  $\delta$  (ppm) 166.0, 164.6, 159.1, 134.1, 133.4, 129.7, 129.5, 129.3, 124.3, 122.7, 119.3, 116.5, 115.4, 86.0, 85.2, 64.9, 55.2, 52.4, 33.9, 24.9, 24.2, 17.0. HRMS (EI):  $m/z$   $[\text{M} + \text{Na}]^+$  calcd for  $\text{C}_{24}\text{H}_{23}\text{NNaO}_5$ : 428.1468, found: 428.1467.

**(S)-7-cyano-1-(3-fluorophenyl)hept-1-yn-3-yl methyl terephthalate 4na**

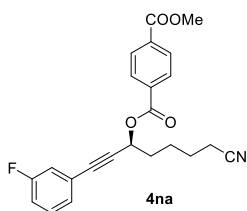

94% isolated yield (37.0 mg), colorless oil,  $[\alpha]_D^{25} = 20.57$  ( $c = 0.5$  in  $\text{CHCl}_3$ ); 96% ee, determined by HPLC analysis (Chiralpak OD column, hexane/*i*-PrOH, 80:20 v/v, flow rate 1.0 mL/min,  $\lambda = 250$  nm, 25 °C),  $t_R$  (major) = 14.13 min,  $t_R$  (minor) = 24.50 min.  $^1\text{H NMR}$  (400 MHz,  $\text{CDCl}_3$ )  $\delta$  (ppm) 8.18 – 8.11 (m, 4H), 7.29 (d,  $J = 6.1$  Hz, 1H), 7.25 (d,  $J = 7.6$  Hz, 1H), 7.18 – 7.15 (m, 1H), 7.05 (t,  $J = 8.4$  Hz, 1H), 5.88 (t,  $J = 6.3$  Hz, 1H), 3.96 (s, 3H), 2.45 – 2.42 (m, 2H), 2.10 – 2.04 (m, 2H), 1.83 – 1.78 (m, 4H).  $^{13}\text{C NMR}$  (100 MHz,  $\text{CDCl}_3$ )  $\delta$  (ppm) 166.1, 164.6, 162.1 (d,  $J = 246.9$  Hz), 134.2, 133.3, 129.9 (d,  $J = 8.6$  Hz), 129.7, 129.5, 127.8, (d,  $J = 3.1$  Hz), 123.6 (d,  $J = 9.3$  Hz), 119.3, 118.9 (d,  $J = 22.9$  Hz), 116.2 (d,  $J = 21.1$  Hz), 86.4, 84.9, 84.8, 64.7, 52.4, 33.9, 24.98, 24.2, 17.1.  $^{19}\text{F NMR}$  (376 MHz,  $\text{CDCl}_3$ )  $\delta$  (ppm) -113.93. HRMS (EI):  $m/z$   $[\text{M} + \text{Na}]^+$  calcd for  $\text{C}_{23}\text{H}_{20}\text{FNNaO}_4$ : 416.1269, found: 416.1265.

**(S)-1-(3-bromophenyl)-7-cyanohept-1-yn-3-yl methyl terephthalate 4oa**

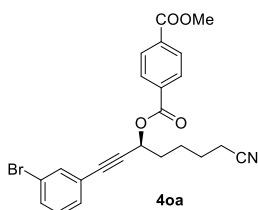

89% isolated yield (40.3 mg), colorless oil,  $[\alpha]_D^{25} = 46.13$  ( $c = 0.5$  in  $\text{CHCl}_3$ ); 95% ee, determined by HPLC analysis (Chiralpak AD column, hexane/*i*-PrOH, 80:20 v/v, flow rate 1.0 mL/min,  $\lambda = 254$  nm, 25 °C),  $t_R$  (minor) = 13.49 min,  $t_R$  (major) = 16.18 min.  $^1\text{H NMR}$  (400 MHz,  $\text{CDCl}_3$ )  $\delta$  (ppm) 8.15 – 8.09 (m, 4H), 7.59 (t,  $J = 1.8$  Hz, 1H), 7.46 – 7.43 (m, 1H), 7.39 – 7.36 (m, 1H), 7.17 (t,  $J = 7.9$  Hz, 1H), 5.85 (t,  $J = 6.3$  Hz, 1H), 3.94 (s, 3H), 2.41 (t,  $J = 6.4$  Hz, 2H), 2.07 – 2.02 (m, 2H), 1.79 – 1.76 (m, 4H).  $^{13}\text{C NMR}$  (100 MHz,  $\text{CDCl}_3$ )  $\delta$  (ppm) 166.1, 164.6, 134.5, 134.1, 133.3, 131.9, 130.4, 129.7, 129.5, 123.8, 122.0, 119.3, 86.8, 84.5, 64.7, 52.4, 33.9, 24.9, 24.2, 17.1. HRMS (EI):  $m/z$   $[\text{M} + \text{Na}]^+$  calcd for  $\text{C}_{23}\text{H}_{20}\text{BrNNaO}_4$ : 476.0468, found: 476.0467.

**(S)-7-cyano-1-(2-methoxyphenyl)hept-1-yn-3-yl methyl terephthalate 4pa**

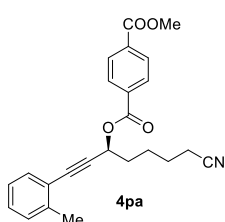

84% isolated yield (32.8 mg), colorless oil,  $[\alpha]_D^{25} = 47.37$  ( $c = 0.5$  in  $\text{CHCl}_3$ ); 98% ee, determined by HPLC analysis (Chiralpak OD column, hexane/*i*-PrOH, 80:20 v/v, flow rate 1.0 mL/min,  $\lambda = 254$  nm, 25 °C),  $t_R$  (major) = 14.09 min,  $t_R$  (minor) = 23.35 min.  $^1\text{H NMR}$  (400 MHz,  $\text{CDCl}_3$ )  $\delta$  (ppm) 7.86 – 7.81 (m, 4H), 7.52 – 7.47 (m, 3H), 7.15 (d,  $J = 3.3$  Hz, 1H), 6.14 – 6.10 (m, 2H), 2.38 (s, 3H), 2.32 (t,  $J = 7.1$  Hz, 2H), 2.19 – 2.12 (m, 1H), 2.05 – 1.97 (m, 1H), 1.76 – 1.61 (m, 3H), 1.55 – 1.46 (m, 1H).  $^{13}\text{C NMR}$  (100 MHz,  $\text{CDCl}_3$ )  $\delta$  (ppm) 166.2, 164.7, 140.5, 134.1, 133.5, 132.1, 129.7, 129.6, 129.4, 128.8, 125.5, 121.6, 119.3, 89.3, 85.3, 65.2, 52.5, 34.1, 25.0, 24.3, 20.6, 17.1. HRMS (EI):  $m/z$   $[\text{M} + \text{Na}]^+$  calcd for  $\text{C}_{24}\text{H}_{23}\text{NNaO}_4$ : 412.1519, found: 412.1513.

**(S)-7-cyano-1-(2-methoxyphenyl)hept-1-yn-3-yl methyl terephthalate 4qa**

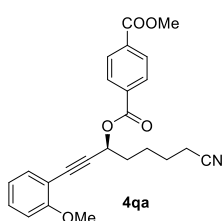

83% isolated yield (33.6 mg), colorless oil,  $[\alpha]_D^{25} = 48.70$  ( $c = 0.5$  in  $\text{CHCl}_3$ ); 94% ee, determined by HPLC analysis (Chiralpak OD column, hexane/*i*-PrOH, 80:20 v/v, flow rate 1.0 mL/min,  $\lambda = 254$  nm, 25 °C),  $t_R$  (major) = 36.75 min,  $t_R$  (minor) = 46.26 min.  $^1\text{H NMR}$  (400 MHz,  $\text{CDCl}_3$ )  $\delta$  (ppm) 8.16 – 8.10 (m, 4H), 7.43 – 7.40 (m, 1H), 7.33 – 7.27 (m, 1H), 6.92 – 6.84 (m, 2H), 5.96 (t,  $J = 6.2$  Hz, 1H), 3.95 (s, 3H), 3.87 (s, 3H), 2.44 – 2.36 (m, 2H), 2.09 –

2.04 (m, 2H), 1.83 – 1.79 (m, 4H). <sup>13</sup>C NMR (100 MHz, CDCl<sub>3</sub>) δ (ppm) 166.3, 164.8, 160.3, 134.1, 133.9, 133.7, 130.4, 129.8, 129.6, 120.4, 119.5, 111.1, 110.6, 65.4, 55.8, 52.5, 34.1, 25.1, 24.3, 17.2. HRMS (EI): m/z [M + Na]<sup>+</sup> calcd for C<sub>24</sub>H<sub>23</sub>NNaO<sub>5</sub>: 428.1468, found: 428.1463.

**(S)-1-(2-chlorophenyl)-7-cyanohept-1-yn-3-yl methyl terephthalate 4ra**

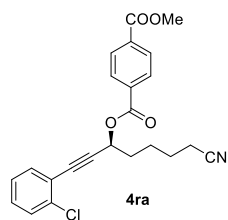

90% isolated yield (36.8 mg), colorless oil, [ $\alpha$ ]<sub>D</sub><sup>25</sup> = -4.00 (c = 0.5 in CHCl<sub>3</sub>); 95% ee, determined by HPLC analysis (Chiralpak OD column, hexane/*i*-PrOH, 80:20 v/v, flow rate 1.0 mL/min,  $\lambda$  = 254 nm, 25 °C), t<sub>R</sub> (major) = 4.95 min, t<sub>R</sub> (minor) = 12.22 min. <sup>1</sup>H NMR (400 MHz, CDCl<sub>3</sub>) δ (ppm) 8.17 – 8.08 (m, 4H), 7.50 – 7.47 (m, 1H), 7.39 (d, *J* = 8.1 Hz, 1H), 7.21 (m, 2H), 5.93 (t, *J* = 6.3 Hz, 1H), 3.95 (s, 3H), 2.42 (t, *J* = 6.3 Hz, 2H), 2.09 – 2.06 (m, 2H), 1.85 – 1.79 (m, 4H). <sup>13</sup>C NMR (100 MHz, CDCl<sub>3</sub>) δ (ppm) 166.2, 164.7, 136.2, 134.2, 133.6, 133.4, 129.9, 129.8, 129.8, 129.6, 129.3, 126.4, 121.8, 119.4, 90.6, 65.0, 52.5, 33.9, 25.0, 24.2, 17.1. HRMS (EI): m/z [M + Na]<sup>+</sup> calcd for C<sub>23</sub>H<sub>20</sub>ClNNaO<sub>4</sub>: 432.0973, found: 432.0972.

**(S)-5-cyano-1-(naphthalen-2-yl)pentyl thiophene-3-carboxylate 4sa**

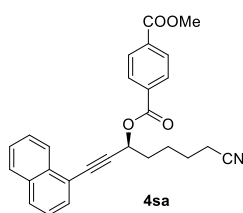

90% isolated yield (31.1 mg), colorless oil, [ $\alpha$ ]<sub>D</sub><sup>25</sup> = 32.97 (c = 0.5 in CHCl<sub>3</sub>); 95% ee, determined by HPLC analysis (Chiralpak IC column, hexane/*i*-PrOH, 80:20 v/v, flow rate 1.0 mL/min,  $\lambda$  = 254 nm, 25 °C), t<sub>R</sub> (minor) = 56.70 min, t<sub>R</sub> (major) = 63.79 min. <sup>1</sup>H NMR (400 MHz, CDCl<sub>3</sub>) δ (ppm) 8.20 – 8.11 (m, 4H), 8.01 (d, *J* = 1.5 Hz, 1H), 7.81 – 7.75 (m, 3H), 7.51 – 7.47 (m, 3H), 5.94 (t, *J* = 6.3 Hz, 1H), 3.95 (s, 3H), 2.45 – 2.39 (m, 2H), 2.12 – 2.07 (m, 2H), 1.83 – 1.79 (m, 4H). <sup>13</sup>C NMR (100 MHz, CDCl<sub>3</sub>) δ (ppm) 166.1, 164.7, 134.1, 133.5, 132.9, 132.7, 132.0, 129.7, 129.5, 128.2, 127.9, 127.7, 127.7, 126.9, 126.6, 119.3, 119.1, 86.5, 85.7, 65.0, 52.4, 34.0, 24.9, 24.3, 17.1. HRMS (EI): m/z [M + Na]<sup>+</sup> calcd for C<sub>27</sub>H<sub>23</sub>NNaO<sub>4</sub>: 448.1519, found: 448.1513.

**(S)-7-cyano-1-(naphthalen-2-yl)hept-1-yn-3-yl methyl terephthalate 4ta**

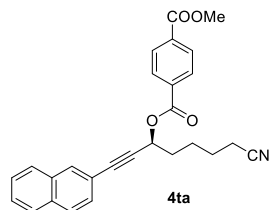

89% isolated yield (37.8 mg), colorless oil, [ $\alpha$ ]<sub>D</sub><sup>25</sup> = 12.10 (c = 0.5 in CHCl<sub>3</sub>); 91% ee, determined by HPLC analysis (Chiralpak OD column, hexane/*i*-PrOH, 80:20 v/v, flow rate 1.0 mL/min,  $\lambda$  = 254 nm, 25 °C), t<sub>R</sub> (major) = 24.10 min, t<sub>R</sub> (minor) = 33.78 min. <sup>1</sup>H NMR (400 MHz, CDCl<sub>3</sub>) δ (ppm) 8.28 (d, *J* = 8.3 Hz, 1H), 8.21 – 8.11 (m, 4H), 7.85 (d, *J* = 8.2 Hz, 2H), 7.71 – 7.60 (m, 1H), 7.60 – 7.56 (m, 1H), 7.54 – 7.50 (m, 1H), 7.44 – 7.40 (m, 1H), 6.03 (t, *J* = 6.3 Hz, 1H), 3.95 (s, 3H), 2.44 (t, *J* = 6.4 Hz, 2H), 2.18 – 2.14 (m, 2H), 1.89 – 1.83 (m, 4H). <sup>13</sup>C NMR (100 MHz, CDCl<sub>3</sub>) δ (ppm) 166.2, 164.8, 134.2, 133.5, 133.3, 133.0, 131.0, 129.8, 129.6, 129.4, 128.3, 127.0, 126.5, 125.8, 125.1, 119.4, 119.4, 90.3, 84.4, 65.3, 52.5, 34.2, 25.0, 24.4 17.2. HRMS (EI): m/z [M + Na]<sup>+</sup> calcd for C<sub>27</sub>H<sub>23</sub>NNaO<sub>4</sub>: 448.1519, found: 448.1520.

**(S)-7-cyano-1-(thiophen-2-yl)hept-1-yn-3-yl methyl terephthalate 4ua**

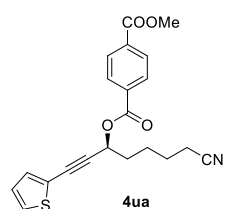

94% isolated yield (35.8 mg), colorless oil, [ $\alpha$ ]<sub>D</sub><sup>25</sup> = 11.90 (c = 0.5 in CHCl<sub>3</sub>); 88% ee, determined by HPLC analysis (Chiralpak OD column, hexane/*i*-PrOH, 80:20 v/v, flow rate 1.0 mL/min,  $\lambda$  = 254 nm, 25 °C), t<sub>R</sub> (major) = 20.34 min, t<sub>R</sub> (minor) = 32.20 min. <sup>1</sup>H NMR (400 MHz, CDCl<sub>3</sub>) δ (ppm) 8.16 – 8.10 (m, 4H), 7.28 (d, *J* = 5.4 Hz, 1H), 7.26 (d, *J* = 3.8 Hz, 1H), 6.98 – 6.96 (m, 1H), 5.90 (t, *J* = 6.3 Hz, 1H), 3.95 (s, 3H), 2.42 (t, *J* = 6.5 Hz, 2H), 2.09 – 2.03 (m, 2H), 1.82 – 1.75 (m, 4H). <sup>13</sup>C NMR (100 MHz, CDCl<sub>3</sub>) δ (ppm) 166.2, 164.7, 134.2, 133.4, 133.1, 129.8, 129.6, 127.9, 127.0, 121.7, 119.3, 89.4, 79.6, 65.0, 52.5, 33.9, 25.0, 24.3, 17.1. HRMS (EI): m/z [M + Na]<sup>+</sup> calcd for C<sub>21</sub>H<sub>19</sub>NNaO<sub>4</sub>S: 404.0927, found: 404.0921.

**(S)-7-cyano-1-(thiophen-3-yl)hept-1-yn-3-yl methyl terephthalate 4va**

80% isolated yield (31.6 mg), colorless oil, [ $\alpha$ ]<sub>D</sub><sup>25</sup> = 11.40 (c = 0.5 in CHCl<sub>3</sub>); 95% ee, determined by HPLC analysis (Chiralpak OD column, hexane/*i*-PrOH, 80:20 v/v, flow rate 1.0 mL/min,  $\lambda$  = 254 nm, 25 °C), t<sub>R</sub> (major) = 20.37 min, t<sub>R</sub>

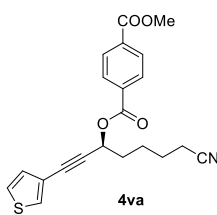

(minor) = 31.98 min.  $^1\text{H}$  NMR (400 MHz,  $\text{CDCl}_3$ )  $\delta$  (ppm) 8.18 – 8.10 (m, 4H), 7.52 – 7.51 (m, 1H), 7.29 – 7.26 (m, 1H), 7.14 – 7.13 (m, 1H), 5.87 (t,  $J$  = 6.3 Hz, 1H), 3.96 (s, 3H), 2.42 (t,  $J$  = 4.4 Hz, 2H), 2.08 – 2.03 (m, 2H), 1.82 – 1.77 (m, 4H).  $^{13}\text{C}$  NMR (100 MHz,  $\text{CDCl}_3$ )  $\delta$  (ppm) 166.1, 164.6, 134.1, 133.4, 129.8, 129.7, 129.5, 125.4, 120.8, 119.3, 85.1, 81.3, 65.0, 52.4, 33.9, 24.9, 24.2, 17.0. HRMS (EI):  $m/z$   $[\text{M} + \text{Na}]^+$  calcd for  $\text{C}_{21}\text{H}_{19}\text{NNaO}_4\text{S}$ : 404.0927, found: 404.0921.

#### (S)-1-cyanotridec-6-yn-5-yl methyl terephthalate 4wa

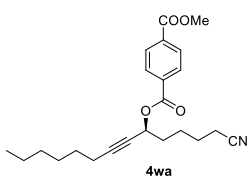

93% isolated yield (33.8 mg), colorless oil,  $[\alpha]_{\text{D}}^{25} = 0.34$  ( $c = 0.5$  in  $\text{CHCl}_3$ ); 18% ee, determined by HPLC analysis (Chiralpak IG column, hexane/*i*-PrOH, 80:20 v/v, flow rate 1.0 mL/min,  $\lambda = 254$  nm, 25 °C),  $t_{\text{R}}$  (minor) = 11.71 min,  $t_{\text{R}}$  (major) = 13.34 min.  $^1\text{H}$  NMR (400 MHz,  $\text{CDCl}_3$ )  $\delta$  (ppm) 8.10 (s, 4H), 5.66 – 5.59 (m, 1H), 3.94 (s, 3H), 2.38 (t,  $J$  = 6.7 Hz, 2H), 2.23 – 2.19 (m, 2H), 1.92 (d,  $J$  = 6.9 Hz, 2H), 1.771– 1.69 (m, 4H), 1.53 – 1.46 (m, 2H), 1.39 – 1.33 (m, 2H), 1.30 – 1.24 (m, 4H), 0.86 (t,  $J$  = 6.7 Hz, 3H).  $^{13}\text{C}$  NMR (100 MHz,  $\text{CDCl}_3$ )  $\delta$  (ppm) 166.2, 164.7, 134.0, 133.7, 129.7, 129.5, 119.4, 87.4, 65.0, 52.4, 34.2, 31.2, 28.4, 28.3, 25.0, 24.2, 22.5, 18.7, 17.1, 14.0. HRMS (EI):  $m/z$   $[\text{M} + \text{Na}]^+$  calcd for  $\text{C}_{23}\text{H}_{29}\text{NNaO}_4$ : 406.1989, found: 406.1994.

#### (S)-9-cyano-1-methoxy-2-(methoxycarbonyl)-1-oxonon-3-yn-5-yl methyl terephthalate 4xa

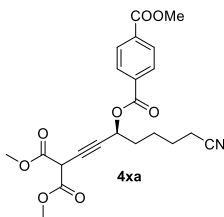

61% isolated yield (30.4 mg), colorless oil,  $[\alpha]_{\text{D}}^{25} = 5.13$  ( $c = 0.5$  in  $\text{CHCl}_3$ ); 72% ee, determined by HPLC analysis (Chiralpak OD column, hexane/*i*-PrOH, 80:20 v/v, flow rate 1.0 mL/min,  $\lambda = 254$  nm, 25 °C),  $t_{\text{R}}$  (major) = 40.29 min,  $t_{\text{R}}$  (minor) = 52.71 min.  $^1\text{H}$  NMR (400 MHz,  $\text{CDCl}_3$ )  $\delta$  (ppm) 8.07 (s, 4H), 5.57 – 5.53 (m, 1H), 3.92 (s, 3H), 3.71 (d,  $J$  = 3.6 Hz, 6H), 3.57 (t,  $J$  = 7.7 Hz, 1H), 2.81 – 2.79 (m, 2H), 2.38 (t,  $J$  = 6.9 Hz, 2H), 1.89 – 1.87 (m, 2H), 1.74 – 1.64 (m, 4H).  $^{13}\text{C}$  NMR (100 MHz,  $\text{CDCl}_3$ )  $\delta$  (ppm) 168.1, 168.0, 166.1, 164.5, 134.0, 133.4, 129.6, 129.5, 129.5, 119.3, 82.4, 79.0, 64.5, 52.7, 52.4, 50.7, 33.8, 24.8, 24.0, 18.7, 17.0. HRMS (EI):  $m/z$   $[\text{M} + \text{Na}]^+$  calcd for  $\text{C}_{22}\text{H}_{23}\text{NNaO}_8$ : 452.1316, found: 452.1319.

#### (S)-5-(1-(tert-butoxycarbonyl)-3-(cyanomethyl)azetid-3-yl)-1-phenylpent-1-yn-3-yl methyl terephthalate 5ba

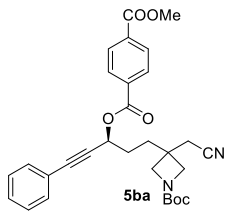

93% isolated yield (47.0 mg), colorless oil,  $[\alpha]_{\text{D}}^{25} = 11.3$  ( $c = 0.5$  in  $\text{CHCl}_3$ ); 91% ee, determined by HPLC analysis (Chiralpak AD column, hexane/*i*-PrOH, 80:20 v/v, flow rate 1.0 mL/min,  $\lambda = 254$  nm, 25 °C),  $t_{\text{R}}$  (minor) = 15.96 min,  $t_{\text{R}}$  (major) = 26.79 min.  $^1\text{H}$  NMR (400 MHz,  $\text{CDCl}_3$ )  $\delta$  (ppm) 8.14– 8.08 (m, 4H), 7.44 (d,  $J$  = 7.0 Hz, 2H), 7.29 (d,  $J$  = 6.8 Hz, 3H), 5.87 (t,  $J$  = 5.5 Hz, 1H), 3.91 (d,  $J$  = 1.9 Hz, 3H), 3.80 – 3.72 (m, 4H), 2.68 (s, 2H), 2.02 (d,  $J$  = 9.7 Hz, 4H), 1.41 (s, 9H).  $^{13}\text{C}$  NMR (100 MHz,  $\text{CDCl}_3$ )  $\delta$  (ppm) 166.1, 164.6, 156.0, 134.2, 133.2, 131.9, 129.8, 129.6, 123.0, 128.3, 128.3, 128.2, 121.6, 116.7, 86.7, 84.9, 80.1, 64.8, 52.5, 42.6, 42.5, 35.1, 31.8, 31.6, 29.8, 28.3, 28.3, 27.7, 25.1. HRMS (EI):  $m/z$   $[\text{M} + \text{Na}]^+$  calcd for  $\text{C}_{30}\text{H}_{32}\text{N}_2\text{NaO}_6$ : 539.2153, found: 539.2157.

#### (S)-5-(1-(tert-butoxycarbonyl)-4-(cyanomethyl)piperidin-4-yl)-1-phenylpent-1-yn-3-yl methyl terephthalate 5ca

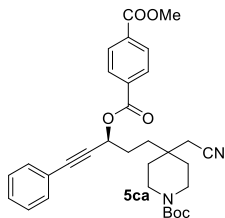

91% isolated yield (49.5 mg), colorless oil,  $[\alpha]_{\text{D}}^{25} = 112.63$  ( $c = 0.5$  in  $\text{CHCl}_3$ ); 87% ee, determined by HPLC analysis (Chiralpak AD column, hexane/*i*-PrOH, 80:20 v/v, flow rate 1.0 mL/min,  $\lambda = 254$  nm, 25 °C),  $t_{\text{R}}$  (minor) = 13.38 min,  $t_{\text{R}}$  (major) = 26.63 min.  $^1\text{H}$  NMR (400 MHz,  $\text{CDCl}_3$ )  $\delta$  (ppm) 8.17 – 8.10 (m, 4H), 7.49 – 7.43 (m, 2H), 7.34 – 7.29 (m, 3H), 5.86 (t,  $J$  = 6.0 Hz, 1H), 3.94 (s, 3H), 3.49 – 3.36 (m, 4H), 2.42 (s, 2H), 1.98 (d,  $J$  = 4.0 Hz, 2H), 1.87 (d,  $J$  = 3.3 Hz, 2H), 1.60 – 1.57 (m, 4H), 1.44 (s, 9H).  $^{13}\text{C}$  NMR (100 MHz,  $\text{CDCl}_3$ )  $\delta$  (ppm) 171.1, 166.2, 164.7, 154.6, 134.2, 133.3, 131.9, 129.8, 129.6, 128.9, 128.3, 121.7, 117.1, 86.4, 85.2, 65.2, 60.4, 52.5, 34.9, 33.9, 31.7, 28.7, 28.3, 25.9, 21.0, 14.2. HRMS (EI):  $m/z$   $[\text{M} + \text{Na}]^+$  calcd for  $\text{C}_{32}\text{H}_{36}\text{N}_2\text{NaO}_6$ : 567.2466, found: 567.2460.



**(2S)-1-(2-(cyanomethyl)cyclopent-3-en-1-yl)-4-phenylbut-3-yn-2-yl methyl terephthalate 5da**

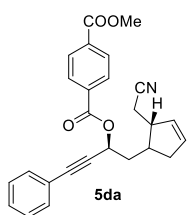

83% isolated yield (34.3 mg), 1:1.2 d.r., colorless oil,  $[\alpha]_D^{25} = 22.33$  ( $c = 0.5$  in  $\text{CHCl}_3$ ); 95% ee/53% ee, determined by HPLC analysis (Chiralpak OD column, hexane/*i*-PrOH, 90:10 v/v, flow rate 0.5 mL/min,  $\lambda = 254$  nm, 25 °C),  $t_R$  (major) = 49.34 min,  $t_R$  (minor) = 74.87 min;  $t_R$  (minor) = 56.83 min,  $t_R$  (major) = 87.02 min.  $^1\text{H NMR}$  (400 MHz,  $\text{CDCl}_3$ )  $\delta$  (ppm) (major + minor) 8.19 – 8.10 (m, 4H), 7.47 (m, 2H), 7.31 (d,  $J = 6.5$  Hz, 3H), 5.96 – 5.91 (m, 1H), 5.88 – 5.85 (m, 1H), 5.67 – 5.64 (m, 1H), 3.94 (s, 3H), 2.87 – 2.75 (m, 2H), 2.57 – 2.42 (m, 2H), 2.35 – 2.30 (m, 2H), 2.27 – 2.21 (m, 1H), 2.17 – 2.11 (m, 1H).  $^{13}\text{C NMR}$  (100 MHz,  $\text{CDCl}_3$ )  $\delta$  (ppm) (major + minor) 166.1, 164.7, 164.6, 134.2, 133.4, 133.4, 132.5, 132.4, 131.9, 131.8, 130.6, 130.5, 129.7, 129.7, 129.6, 129.5, 128.8, 128.8, 128.3, 128.2, 121.8, 118.5, 118.4, 86.5, 86.3, 85.7, 85.4, 64.5, 64.2, 52.4, 48.2, 48.0, 40.4, 40.4, 40.2, 39.9, 39.1, 39.0, 22.7, 22.6. HRMS (EI):  $m/z$   $[\text{M} + \text{Na}]^+$  calcd for  $\text{C}_{26}\text{H}_{23}\text{NNaO}_4$ : 436.1519, found: 436.1520.

**(S)-5-(2-cyanophenyl)-1-phenylpent-1-yn-3-yl methyl terephthalate 5ea**

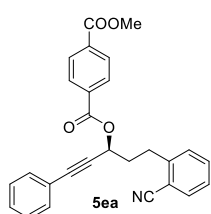

80% isolated yield (33.9 mg), colorless oil,  $[\alpha]_D^{25} = 55.40$  ( $c = 0.5$  in  $\text{CHCl}_3$ ); 95% ee, determined by HPLC analysis (Chiralpak OD column, hexane/*i*-PrOH, 90:10 v/v, flow rate 0.5 mL/min,  $\lambda = 254$  nm, 25 °C),  $t_R$  (major) = 39.14 min,  $t_R$  (minor) = 61.61 min.  $^1\text{H NMR}$  (400 MHz,  $\text{CDCl}_3$ )  $\delta$  (ppm) 8.15 – 8.09 (m, 4H), 7.64 – 7.62 (m, 1H), 7.55 – 7.47 (m, 3H), 7.40 (d,  $J = 7.4$  Hz, 1H), 7.33 – 7.28 (m, 4H), 5.89 (t,  $J = 6.2$  Hz, 1H), 3.95 (s, 3H), 3.20 (t,  $J = 7.9$  Hz, 2H), 2.47 – 2.38 (m, 2H).  $^{13}\text{C NMR}$  (100 MHz,  $\text{CDCl}_3$ )  $\delta$  (ppm) 166.1, 164.6, 144.5, 134.1, 133.4, 133.0, 132.89, 131.9, 129.8, 129.6, 129.5, 128.8, 128.2, 126.9, 121.8, 117.7, 112.4, 86.6, 85.2, 64.7, 52.4, 35.5, 30.1. HRMS (EI):  $m/z$   $[\text{M} + \text{Na}]^+$  calcd for  $\text{C}_{27}\text{H}_{21}\text{NNaO}_4$ : 446.1363, found: 446.1367.

**(3S)-7-cyano-1,6-diphenylhept-1-yn-3-yl methyl terephthalate 5fa**

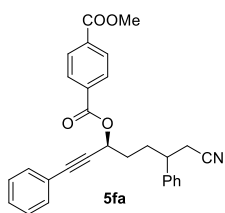

85% isolated yield (38.4 mg), 1:1.2 d.r., colorless oil,  $[\alpha]_D^{25} = 21.50$  ( $c = 0.5$  in  $\text{CHCl}_3$ ); 98% ee/96% ee, determined by HPLC analysis (Chiralpak AZ column, hexane/*i*-PrOH, 90:10 v/v, flow rate 0.5 mL/min,  $\lambda = 254$  nm, 25 °C),  $t_R$  (minor) = 44.73 min,  $t_R$  (major) = 62.35 min;  $t_R$  (minor) = 48.01 min,  $t_R$  (major) = 56.66 min.  $^1\text{H NMR}$  (400 MHz,  $\text{CDCl}_3$ )  $\delta$  (ppm) (major + minor) 8.11 (d,  $J = 3.7$  Hz, 4H), 7.46– 7.43 (m, 2H), 7.38 – 7.34 (m, 3H), 7.31 (d,  $J = 6.4$  Hz, 4H), 7.24 (s, 1H), 5.83 (t,  $J = 6.3$  Hz, 1H), 3.93 (d,  $J = 1.2$  Hz, 3H), 3.10 – 3.02 (m, 1H), 2.64 (d,  $J = 6.9$  Hz, 2H), 2.20 – 2.14 (m, 1H), 2.13 – 2.06 (m, 1H), 1.99 – 1.92 (m, 1H), 1.89 – 1.83 (m, 1H).  $^{13}\text{C NMR}$  (100 MHz,  $\text{CDCl}_3$ )  $\delta$  (ppm) (major + minor) 166.1, 164.5, 164.5, 140.7, 134.0, 134.0, 133.4, 131.8, 131.8, 129.7, 129.6, 129.5, 129.5, 129.0, 128.8, 128.7, 128.2, 127.6, 127.1, 127.1, 121.7, 118.2, 86.2, 86.1, 85.4, 64.9, 64.9, 52.4, 41.7, 41.7, 32.5, 32.4, 30.1, 30.0, 25.3. HRMS (EI):  $m/z$   $[\text{M} + \text{Na}]^+$  calcd for  $\text{C}_{29}\text{H}_{25}\text{NNaO}_4$ : 474.1676, found: 474.1682.

***tert*-butyl (S)-4-(cyanomethyl)-4-(3-((4-methylbenzoyl)oxy)-5-phenylpent-4-yn-1-yl)piperidine-1-carboxylate 5cc**

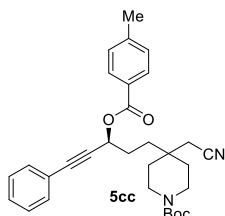

75% isolated yield (37.5 mg), white solid,  $[\alpha]_D^{25} = 21.50$  ( $c = 0.5$  in  $\text{CHCl}_3$ ); 86% ee, determined by HPLC analysis (Chiralpak OX column, hexane/*i*-PrOH, 80:20 v/v, flow rate 0.5 mL/min,  $\lambda = 254$  nm, 25 °C),  $t_R$  (major) = 59.62 min,  $t_R$  (minor) = 64.01 min.  $^1\text{H NMR}$  (400 MHz,  $\text{CDCl}_3$ )  $\delta$  (ppm) 7.99 (d,  $J = 8.2$  Hz, 2H), 7.48 – 7.44 (m, 2H), 7.31 (d,  $J = 5.7$  Hz, 3H), 7.26 (d,  $J = 7.9$  Hz, 2H), 5.86 (t,  $J = 5.9$  Hz, 1H), 3.42 (d,  $J = 6.1$  Hz, 4H), 2.41 (d,  $J = 3.1$  Hz, 5H), 2.00 – 1.94 (m, 2H), 1.89 – 1.82 (m, 2H), 1.61 – 1.54 (m, 4H), 1.45 (s, 9H).  $^{13}\text{C NMR}$  (100 MHz,  $\text{CDCl}_3$ )  $\delta$  (ppm) 165.4, 154.6, 144.0, 131.9, 129.8, 129.1, 128.7, 128.2, 126.8, 121.9, 117.1, 85.9, 85.7, 79.7, 64.4, 33.8, 31.5, 28.7, 28.3, 26.0, 21.6. HRMS (EI):  $m/z$   $[\text{M} + \text{Na}]^+$  calcd for  $\text{C}_{31}\text{H}_{36}\text{N}_2\text{NaO}_4$ : 523.2567, found: 523.2570.

**(S)-methyl (9-oxo-1,9-diphenylnon-1-yn-3-yl) terephthalate 5ga**

70% isolated yield (32.8 mg), colorless oil,  $[\alpha]_D^{25} = 22.00$  ( $c = 0.5$  in  $\text{CHCl}_3$ ); 92% ee, determined by HPLC analysis (Chiralpak AZ column, hexane/*i*-PrOH, 80:20 v/v, flow rate 1.0 mL/min,  $\lambda = 254$  nm, 25 °C),  $t_R$  (minor) = 31.67 min,  $t_R$

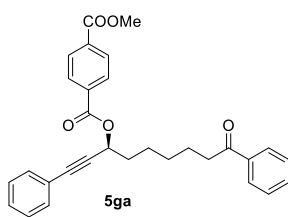

(major) = 38.19 min.  $^1\text{H}$  NMR (400 MHz,  $\text{CDCl}_3$ )  $\delta$  (ppm) 8.23 – 8.06 (m, 4H), 7.95 (d,  $J$  = 7.0 Hz, 2H), 7.55 (t,  $J$  = 7.4 Hz, 1H), 7.50 – 7.39 (m, 4H), 7.30 (d,  $J$  = 6.9 Hz, 3H), 5.87 (t,  $J$  = 6.5 Hz, 1H), 3.95 (s, 3H), 2.99 (t,  $J$  = 7.3 Hz, 2H), 2.07 – 2.01 (m, 2H), 1.84 – 1.76 (m, 2H), 1.70 – 1.62 (m, 2H), 1.54 – 1.47 (m, 2H).  $^{13}\text{C}$  NMR (100 MHz,  $\text{CDCl}_3$ )  $\delta$  (ppm) 200.2, 166.3, 164.8, 136.9, 134.0, 133.7, 132.9, 131.9, 129.8, 129.5, 128.6, 128.6, 128.2, 128.0, 122.1, 65.5, 52.5, 38.3, 34.8, 28.8, 25.0, 24.0. HRMS (EI):  $m/z$   $[\text{M} + \text{Na}]^+$  calcd for  $\text{C}_{30}\text{H}_{28}\text{NaO}_5$ : 491.1829, found: 491.1830.

#### (S)-7-cyano-1-phenylhept-1-yn-3-yl benzoate 7ab

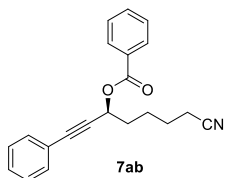

84% isolated yield (26.6 mg), colorless oil,  $[\alpha]_{\text{D}}^{25}$  = -9.23 ( $c$  = 0.5 in  $\text{CHCl}_3$ ); 94% ee, determined by HPLC analysis (Chiralpak OD column, hexane/*i*-PrOH, 80:20 v/v, flow rate 1.0 mL/min,  $\lambda$  = 254 nm, 25 °C),  $t_{\text{R}}$  (minor) = 11.46 min,  $t_{\text{R}}$  (major) = 12.80 min.  $^1\text{H}$  NMR (400 MHz,  $\text{CDCl}_3$ )  $\delta$  (ppm) 8.13 – 8.07 (m, 2H), 7.58 (t,  $J$  = 7.4 Hz, 1H), 7.48 – 7.44 (m, 4H), 7.36 – 7.29 (m, 3H), 5.89 (t,  $J$  = 6.3 Hz, 1H), 2.45 – 2.37 (m, 2H), 2.10 – 1.99 (m, 2H), 1.80 – 1.77 (m, 4H).  $^{13}\text{C}$  NMR (100 MHz,  $\text{CDCl}_3$ )  $\delta$  (ppm) 165.4, 133.2, 131.8, 129.7, 128.7, 128.4, 128.2, 122.0, 119.3, 85.8, 64.4, 34.0, 24.9, 24.2, 17.0. HRMS (EI):  $m/z$   $[\text{M} + \text{Na}]^+$  calcd for  $\text{C}_{21}\text{H}_{19}\text{NNaO}_2$ : 340.1308, found: 340.1306.

#### (S)-7-cyano-1-phenylhept-1-yn-3-yl 4-methylbenzoate 7ac

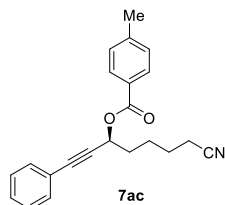

89% isolated yield (29.5 mg), colorless oil,  $[\alpha]_{\text{D}}^{25}$  = 7.03 ( $c$  = 0.5 in  $\text{CHCl}_3$ ); 95% ee, determined by HPLC analysis (Chiralpak OD column, hexane/*i*-PrOH, 80:20 v/v, flow rate 1.0 mL/min,  $\lambda$  = 254 nm, 25 °C),  $t_{\text{R}}$  (minor) = 10.87 min,  $t_{\text{R}}$  (major) = 12.01 min.  $^1\text{H}$  NMR (400 MHz,  $\text{CDCl}_3$ )  $\delta$  (ppm) 7.98 (d,  $J$  = 8.0 Hz, 2H), 7.48 – 7.44 (m, 2H), 7.36 – 7.29 (m, 3H), 7.27 (s, 1H), 7.25 (s, 1H), 5.88 (t,  $J$  = 6.3 Hz, 1H), 2.41 (s, 3H), 2.41 – 2.37 (m, 2H), 2.09 – 1.98 (m, 2H), 1.80 – 1.77 (m, 4H).  $^{13}\text{C}$  NMR (100 MHz,  $\text{CDCl}_3$ )  $\delta$  (ppm) 165.5, 143.9, 131.8, 129.8, 129.7, 129.1, 129.0, 128.6, 128.2, 126.9, 122.0, 119.3, 86.0, 85.7, 64.2, 34.0, 24.9, 24.2, 21.6, 17.0. HRMS (EI):  $m/z$   $[\text{M} + \text{Na}]^+$  calcd for  $\text{C}_{22}\text{H}_{21}\text{NNaO}_2$ : 354.1465, found: 354.1458.

#### (S)-7-cyano-1-phenylhept-1-yn-3-yl 4-methoxybenzoate 7ad

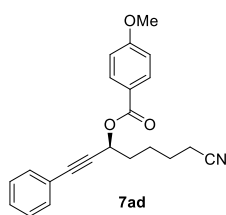

89% isolated yield (30.9 mg), colorless oil,  $[\alpha]_{\text{D}}^{25}$  = 20.53 ( $c$  = 0.5 in  $\text{CHCl}_3$ ); 96% ee, determined by HPLC analysis (Chiralpak OD column, hexane/*i*-PrOH, 90:10 v/v, flow rate 1.0 mL/min,  $\lambda$  = 254 nm, 25 °C),  $t_{\text{R}}$  (minor) = 37.49 min,  $t_{\text{R}}$  (major) = 40.04 min.  $^1\text{H}$  NMR (400 MHz,  $\text{CDCl}_3$ )  $\delta$  (ppm) 8.07 – 8.03 (m, 2H), 7.48 – 7.43 (m, 2H), 7.33 – 7.28 (m, 3H), 6.96 – 6.91 (m, 2H), 5.86 (t,  $J$  = 6.3 Hz, 1H), 3.85 (s, 3H), 2.42 – 2.37 (m, 2H), 2.05 – 2.02 (m, 2H), 1.80 – 1.76 (m, 4H).  $^{13}\text{C}$  NMR (100 MHz,  $\text{CDCl}_3$ )  $\delta$  (ppm) 165.1, 163.5, 131.8, 131.8, 131.8, 131.6, 128.6, 128.2, 128.1, 122.0, 119.4, 113.6, 113.6, 86.1, 85.6, 64.0, 55.4, 34.1, 24.9, 24.2, 17.0. HRMS (EI):  $m/z$   $[\text{M} + \text{Na}]^+$  calcd for  $\text{C}_{22}\text{H}_{21}\text{NNaO}_3$ : 370.1414, found: 370.1409.

#### (S)-7-cyano-1-phenylhept-1-yn-3-yl 4-chlorobenzoate 7ae

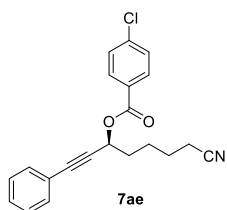

80% isolated yield (28.1 mg), colorless oil,  $[\alpha]_{\text{D}}^{25}$  = 11.57 ( $c$  = 0.5 in  $\text{CHCl}_3$ ); 96% ee, determined by HPLC analysis (Chiralpak OD column, hexane/*i*-PrOH, 90:10 v/v, flow rate 1.0 mL/min,  $\lambda$  = 254 nm, 25 °C),  $t_{\text{R}}$  (minor) = 18.97 min,  $t_{\text{R}}$  (major) = 21.72 min.  $^1\text{H}$  NMR (400 MHz,  $\text{CDCl}_3$ )  $\delta$  (ppm) 8.09 – 7.95 (m, 2H), 7.50 – 7.40 (m, 4H), 7.31 (d,  $J$  = 6.5 Hz, 3H), 5.87 (t,  $J$  = 6.3 Hz, 1H), 2.45 – 2.35 (m, 2H), 2.06 – 2.01 (m, 2H), 1.80 – 1.76 (m, 4H).  $^{13}\text{C}$  NMR (100 MHz,  $\text{CDCl}_3$ )  $\delta$  (ppm) 164.6, 139.7, 131.8, 131.1, 128.7, 128.7, 128.2, 128.1, 121.9, 119.3, 86.0, 85.6, 64.7, 34.0, 24.9, 24.2, 17.0. HRMS (EI):  $m/z$   $[\text{M} + \text{Na}]^+$  calcd for  $\text{C}_{21}\text{H}_{18}\text{ClNNaO}_2$ : 374.0918, found: 374.0913.

#### (S)-7-cyano-1-phenylhept-1-yn-3-yl 4-bromobenzoate 7af

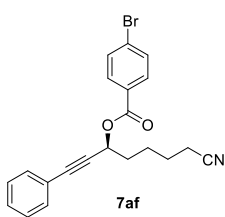

80% isolated yield (31.6 mg), colorless oil,  $[\alpha]_D^{25} = 46.74$  ( $c = 0.5$  in  $\text{CHCl}_3$ ); 95% ee, determined by HPLC analysis (Chiralpak IG column, hexane/*i*-PrOH, 90:10 v/v, flow rate 1.0 mL/min,  $\lambda = 254$  nm, 25 °C),  $t_R$  (minor) = 26.39 min,  $t_R$  (major) = 29.01 min.  $^1\text{H}$  NMR (400 MHz,  $\text{CDCl}_3$ )  $\delta$  (ppm) 7.94 (d,  $J = 8.2$  Hz, 2H), 7.59 (d,  $J = 8.3$  Hz, 2H), 7.47 – 7.44 (m, 2H), 7.31 (d,  $J = 6.4$  Hz, 3H), 5.86 (t,  $J = 6.3$  Hz, 1H), 2.43 – 2.36 (m, 2H), 2.09 – 1.98 (m, 2H), 1.79 – 1.75 (m, 4H).  $^{13}\text{C}$  NMR (100 MHz,  $\text{CDCl}_3$ )  $\delta$  (ppm) 164.7, 131.8, 131.7, 131.2, 128.7, 128.5, 128.3, 128.2, 121.8, 119.3, 86.0, 85.5, 64.7, 33.9, 24.9, 24.1, 17.0. HRMS (EI):  $m/z$   $[\text{M} + \text{Na}]^+$  calcd for  $\text{C}_{21}\text{H}_{18}\text{BrNNaO}_2$ : 418.0413, found: 418.0418.

**(S)-7-cyano-1-phenylhept-1-yn-3-yl 4-(trifluoromethyl)benzoate 7ag**

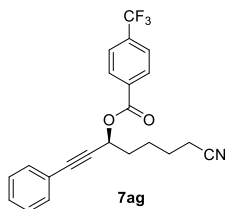

81% isolated yield (31.2 mg), colorless oil,  $[\alpha]_D^{25} = -12.70$  ( $c = 0.5$  in  $\text{CHCl}_3$ ); 96% ee, determined by HPLC analysis (Chiralpak OD column, hexane/*i*-PrOH, 80:20 v/v, flow rate 1.0 mL/min,  $\lambda = 254$  nm, 25 °C),  $t_R$  (minor) = 10.95 min,  $t_R$  (major) = 12.08 min.  $^1\text{H}$  NMR (400 MHz,  $\text{CDCl}_3$ )  $\delta$  (ppm) 8.02 (d,  $J = 8.5$  Hz, 2H), 7.49 – 7.41 (m, 4H), 7.31 (d,  $J = 6.6$  Hz, 3H), 5.87 (t,  $J = 6.3$  Hz, 1H), 2.43 – 2.36 (m, 2H), 2.07 – 2.04 (m, 2H), 1.81 – 1.77 (m, 4H).  $^{13}\text{C}$  NMR (100 MHz,  $\text{CDCl}_3$ )  $\delta$  (ppm) 164.2, 134.6 (q,  $J = 32.6$  Hz), 132.9, 131.8, 130.1, 128.8, 128.3, 125.4 (q,  $J = 3.7$  Hz), 124.9, 122.0 (d,  $J = 37.8$  Hz), 119.3, 86.2, 85.3, 65.1, 34.0, 24.9, 24.2, 17.0.  $^{19}\text{F}$  NMR (376 MHz,  $\text{CDCl}_3$ )  $\delta$  (ppm) -63.09. HRMS (EI):  $m/z$   $[\text{M} + \text{Na}]^+$  calcd for  $\text{C}_{22}\text{H}_{18}\text{F}_3\text{NNaO}_2$ : 408.1182, found: 408.1180.

**(S)-7-cyano-1-phenylhept-1-yn-3-yl [1,1'-biphenyl]-4-carboxylate 7ah**

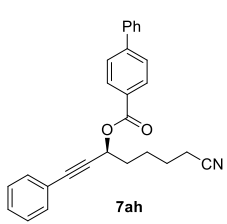

75% isolated yield (29.5 mg), colorless oil,  $[\alpha]_D^{25} = 17.20$  ( $c = 0.5$  in  $\text{CHCl}_3$ ); 96% ee, determined by HPLC analysis (Chiralpak OD column, hexane/*i*-PrOH, 80:20 v/v, flow rate 1.0 mL/min,  $\lambda = 254$  nm, 25 °C),  $t_R$  (minor) = 16.69 min,  $t_R$  (major) = 20.28 min.  $^1\text{H}$  NMR (400 MHz,  $\text{CDCl}_3$ )  $\delta$  (ppm) 8.19 (d,  $J = 8.1$  Hz, 2H), 7.70 (d,  $J = 8.2$  Hz, 2H), 7.66 – 7.63 (m, 2H), 7.49 (t,  $J = 7.8$  Hz, 4H), 7.42 (d,  $J = 7.2$  Hz, 1H), 7.35 – 7.31 (m, 3H), 5.94 (t,  $J = 6.3$  Hz, 1H), 2.44 – 2.38 (m, 2H), 2.11 – 2.05 (m, 2H), 1.86 – 1.78 (m, 4H).  $^{13}\text{C}$  NMR (100 MHz,  $\text{CDCl}_3$ )  $\delta$  (ppm) 165.6, 138.2, 134.0, 131.8, 130.2, 129.6, 128.7, 128.3, 128.2, 126.9, 122.0, 119.3, 85.9, 85.8, 64.3, 34.0, 25.0, 24.2, 21.2, 17.0. HRMS (EI):  $m/z$   $[\text{M} + \text{Na}]^+$  calcd for  $\text{C}_{27}\text{H}_{23}\text{NNaO}_2$ : 416.1621, found: 416.1617.

**(S)-7-cyano-1-phenylhept-1-yn-3-yl 3-methylbenzoate 7ai**

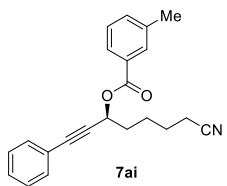

95% isolated yield (31.4 mg), colorless oil,  $[\alpha]_D^{25} = -25.83$  ( $c = 0.5$  in  $\text{CHCl}_3$ ); 96% ee, determined by HPLC analysis (Chiralpak OD column, hexane/*i*-PrOH, 80:20 v/v, flow rate 1.0 mL/min,  $\lambda = 254$  nm, 25 °C),  $t_R$  (minor) = 10.35 min,  $t_R$  (major) = 11.56 min.  $^1\text{H}$  NMR (400 MHz,  $\text{CDCl}_3$ )  $\delta$  (ppm) 7.90 (d,  $J = 7.4$  Hz, 2H), 7.48 – 7.45 (m, 2H), 7.39 (d,  $J = 7.6$  Hz, 1H), 7.36 (d,  $J = 7.4$  Hz, 1H), 7.34 – 7.30 (m, 3H), 5.89 (t,  $J = 6.3$  Hz, 1H), 2.42 (s, 3H), 2.40 – 2.38 (m, 2H), 2.07 – 2.02 (m, 2H), 1.81 – 1.77 (m, 4H).  $^{13}\text{C}$  NMR (100 MHz,  $\text{CDCl}_3$ )  $\delta$  (ppm) 174.4, 141.5, 141.5, 137.5, 133.1, 128.5, 128.0, 127.7, 126.6, 126.3, 126.2, 125.6, 124.3, 123.9, 119.4, 75.7, 43.8, 36.2, 36.1, 35.4, 25.1, 24.6, 17.0. HRMS (EI):  $m/z$   $[\text{M} + \text{Na}]^+$  calcd for  $\text{C}_{22}\text{H}_{21}\text{NNaO}_2$ : 354.1465, found: 354.1470.

**(S)-7-cyano-1-phenylhept-1-yn-3-yl 3-methoxybenzoate 7aj**

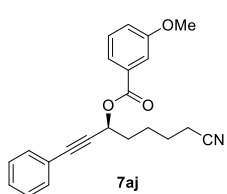

90% isolated yield (31.2 mg), colorless oil,  $[\alpha]_D^{25} = -21.53$  ( $c = 0.5$  in  $\text{CHCl}_3$ ); 96% ee, determined by HPLC analysis (Chiralpak OD column, hexane/*i*-PrOH, 90:10 v/v, flow rate 1.0 mL/min,  $\lambda = 254$  nm, 25 °C),  $t_R$  (minor) = 26.55 min,  $t_R$  (major) = 31.17 min.  $^1\text{H}$  NMR (400 MHz,  $\text{CDCl}_3$ )  $\delta$  (ppm) 7.70 – 7.68 (m, 1H), 7.60 (t,  $J = 1.9$  Hz, 1H), 7.47 – 7.45 (m, 2H), 7.37 (t,  $J = 8.0$  Hz, 1H), 7.34 – 7.29 (m, 3H), 7.14 – 7.11 (m, 1H), 5.88 (t,  $J = 6.3$  Hz, 1H), 3.86 (s, 3H), 2.43 – 2.41 – 2.38 (m, 2H), 2.07 – 2.02 (m, 2H), 1.81 – 1.77 (m, 4H).  $^{13}\text{C}$  NMR (100 MHz,  $\text{CDCl}_3$ )  $\delta$  (ppm) 165.3, 159.5, 131.8, 131.0, 129.4, 128.7, 128.2, 122.1, 122.0, 119.6, 119.3, 114.2, 85.9, 85.8, 64.5, 55.4, 34.0, 24.9, 24.2, 17.0. HRMS (EI):

m/z [M + Na]<sup>+</sup> calcd for C<sub>22</sub>H<sub>21</sub>NNaO<sub>3</sub>: 370.1414, found: 370.1412.

**(S)-7-cyano-1-phenylhept-1-yn-3-yl 3-bromobenzoate 7ak**

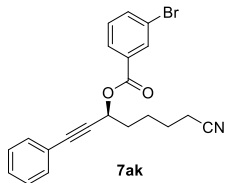

80% isolated yield (31.6 mg), colorless oil,  $[\alpha]_D^{25} = -23.10$  ( $c = 0.5$  in CHCl<sub>3</sub>); 95% ee, determined by HPLC analysis (Chiralpak OD column, hexane/*i*-PrOH, 80:20 v/v, flow rate 1.0 mL/min,  $\lambda = 254$  nm, 25 °C),  $t_R$  (minor) = 11.62 min,  $t_R$  (major) = 14.67 min. <sup>1</sup>H NMR (400 MHz, CDCl<sub>3</sub>)  $\delta$  (ppm) 8.21 (d,  $J = 1.8$  Hz, 1H), 8.02 (d,  $J = 7.8$  Hz, 1H), 7.74 – 7.67 (m, 1H), 7.47 – 7.45 (m, 2H), 7.36 – 7.30 (m, 4H), 5.87 (t,  $J = 6.3$  Hz, 1H), 2.44 – 2.38 (m, 2H), 2.10 – 2.00 (m, 2H), 1.80 – 1.75 (m, 4H). <sup>13</sup>C NMR (100 MHz, CDCl<sub>3</sub>)  $\delta$  (ppm) 164.1, 136.1, 132.6, 131.8, 131.6, 130.0, 128.8, 128.3, 128.2, 122.4, 121.8, 119.3, 86.2, 85.4, 65.0, 34.0, 24.9, 24.2, 17.0. HRMS (EI): m/z [M + Na]<sup>+</sup> calcd for C<sub>21</sub>H<sub>18</sub>BrNNaO<sub>2</sub>: 418.0413, found: 418.0412.

**(S)-7-cyano-1-phenylhept-1-yn-3-yl 3-(methylthio)benzoate 7al**

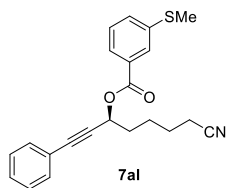

90% isolated yield (32.7 mg), colorless oil,  $[\alpha]_D^{25} = -21.13$  ( $c = 0.5$  in CHCl<sub>3</sub>); 95% ee, determined by HPLC analysis (Chiralpak OD column, hexane/*i*-PrOH, 80:20 v/v, flow rate 1.0 mL/min,  $\lambda = 254$  nm, 25 °C),  $t_R$  (minor) = 15.28 min,  $t_R$  (major) = 18.08 min. <sup>1</sup>H NMR (400 MHz, CDCl<sub>3</sub>)  $\delta$  (ppm) 7.95 (d,  $J = 1.9$  Hz, 1H), 7.84 (d,  $J = 7.6$  Hz, 1H), 7.47 – 7.44 (m, 3H), 7.38 (d,  $J = 7.7$  Hz, 1H), 7.34 – 7.29 (m, 3H), 5.87 (t,  $J = 6.3$  Hz, 1H), 2.53 (s, 3H), 2.40 (t,  $J = 4.4$  Hz, 2H), 2.07 – 2.02 (m, 2H), 1.80 – 1.77 (m, 4H). <sup>13</sup>C NMR (100 MHz, CDCl<sub>3</sub>)  $\delta$  (ppm) 165.1, 139.4, 131.8, 131.0, 130.3, 128.7, 128.7, 128.2, 127.3, 126.2, 121.9, 119.3, 86.0, 85.7, 64.6, 34.0, 25.0, 24.2, 17.1, 15.6. HRMS (EI): m/z [M + Na]<sup>+</sup> calcd for C<sub>22</sub>H<sub>21</sub>N<sub>2</sub>NaO<sub>2</sub>S: 386.1185, found: 386.1183.

**(S)-7-cyano-1-phenylhept-1-yn-3-yl 3-((tert-butoxycarbonyl)amino)benzoate 7am**

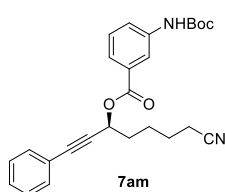

88% isolated yield (38.0 mg), colorless oil,  $[\alpha]_D^{25} = 9.37$  ( $c = 0.5$  in CHCl<sub>3</sub>); 96% ee, determined by HPLC analysis (Chiralpak AD column, hexane/*i*-PrOH, 80:20 v/v, flow rate 1.0 mL/min,  $\lambda = 254$  nm, 25 °C),  $t_R$  (major) = 10.47 min,  $t_R$  (minor) = 12.51 min. <sup>1</sup>H NMR (400 MHz, CDCl<sub>3</sub>)  $\delta$  (ppm) 7.93 (t,  $J = 1.9$  Hz, 1H), 7.76 (t,  $J = 8.9$  Hz, 2H), 7.46 – 7.44 (m, 2H), 7.39 (t,  $J = 8.0$  Hz, 1H), 7.33 – 7.29 (m, 3H), 6.70 (s, 1H), 5.86 (t,  $J = 6.2$  Hz, 1H), 2.45 – 2.38 (m, 2H), 2.06 – 2.01 (m, 2H), 1.81 – 1.78 (m, 4H), 1.52 (s, 9H). <sup>13</sup>C NMR (100 MHz, CDCl<sub>3</sub>)  $\delta$  (ppm) 165.2, 152.6, 138.8, 131.9, 130.5, 129.2, 128.8, 128.3, 124.3, 123.3, 122.1, 119.6, 119.5, 86.0, 85.8, 80.9, 64.6, 34.0, 28.3, 25.0, 24.2, 17.1. HRMS (EI): m/z [M + Na]<sup>+</sup> calcd for C<sub>26</sub>H<sub>28</sub>NNaO<sub>4</sub>: 455.1941, found: 455.1936.

**(S)-7-cyano-1-phenylhept-1-yn-3-yl 2-methylbenzoate 7an**

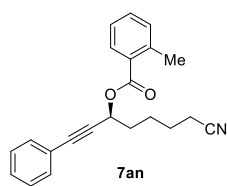

88% isolated yield (29.1 mg), colorless oil,  $[\alpha]_D^{25} = -29.17$  ( $c = 0.5$  in CHCl<sub>3</sub>); 94% ee, determined by HPLC analysis (Chiralpak OD column, hexane/*i*-PrOH, 90:10 v/v, flow rate 1.0 mL/min,  $\lambda = 254$  nm, 25 °C),  $t_R$  (minor) = 18.76 min,  $t_R$  (major) = 20.65 min. <sup>1</sup>H NMR (400 MHz, CDCl<sub>3</sub>)  $\delta$  (ppm) 7.97 (d,  $J = 7.3$  Hz, 1H), 7.48 (d,  $J = 2.0$  Hz, 1H), 7.45 (t,  $J = 2.4$  Hz, 1H), 7.42 (d,  $J = 7.6$  Hz, 1H), 7.37 – 7.31 (m, 3H), 7.27 (d,  $J = 4.9$  Hz, 2H), 5.88 (t,  $J = 6.3$  Hz, 1H), 2.65 (s, 3H), 2.44 – 2.38 (m, 2H), 2.04 (t,  $J = 7.0$  Hz, 2H), 1.82 – 1.78 (m, 4H). <sup>13</sup>C NMR (100 MHz, CDCl<sub>3</sub>)  $\delta$  (ppm) 166.4, 140.4, 132.2, 131.8, 131.7, 130.7, 129.1, 128.7, 128.2, 128.1, 125.7, 122.1, 119.4, 86.0, 85.8, 64.1, 34.1, 25.0, 24.3, 21.8, 17.1. HRMS (EI): m/z [M + Na]<sup>+</sup> calcd for C<sub>22</sub>H<sub>21</sub>NNaO<sub>2</sub>: 354.1465, found: 354.1461.

**(S)-7-cyano-1-phenylhept-1-yn-3-yl 2-chlorobenzoate 7ao**

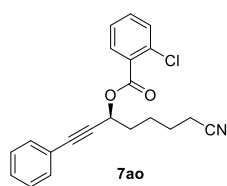

80% isolated yield (28.1 mg), colorless oil,  $[\alpha]_D^{25} = -33.17$  ( $c = 0.5$  in CHCl<sub>3</sub>); 93% ee, determined by HPLC analysis (Chiralpak IG column, hexane/*i*-PrOH, 80:20 v/v, flow rate 1.0 mL/min,  $\lambda = 254$  nm, 25 °C),  $t_R$  (minor) = 30.91 min,  $t_R$  (major) = 34.11 min. <sup>1</sup>H NMR (400 MHz, CDCl<sub>3</sub>)  $\delta$  (ppm) 7.89 – 7.87 (m, 1H), 7.51 – 7.42 (m, 4H), 7.36 – 7.29 (m, 4H), 5.89 (t,  $J = 6.3$  Hz, 1H), 2.47 – 2.37 (m, 2H), 2.12 – 2.00 (m, 2H), 1.87 – 1.76 (m, 4H). <sup>13</sup>C NMR (100 MHz, CDCl<sub>3</sub>)  $\delta$

(ppm) 164.6, 133.8, 132.8, 131.8, 131.5, 131.1, 129.6, 128.7, 128.2, 126.6, 121.9, 119.4, 86.1, 85.4, 65.1, 33.9, 24.9, 24.2, 17.1. HRMS (EI):  $m/z$   $[M + Na]^+$  calcd for  $C_{21}H_{18}ClNNaO_2$ : 374.0918, found: 374.0915.

**(S)-7-cyano-1-phenylhept-1-yn-3-yl benzo[d][1,3]dioxole-4-carboxylate 7ap**

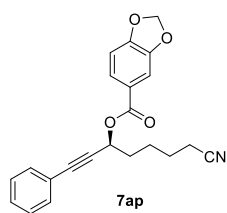

83% isolated yield (30.0 mg), colorless oil,  $[\alpha]_D^{25} = -55.60$  ( $c = 0.5$  in  $CHCl_3$ ); 95% ee, determined by HPLC analysis (Chiralpak OD column, hexane/*i*-PrOH, 80:20 v/v, flow rate 1.0 mL/min,  $\lambda = 254$  nm, 25 °C),  $t_R$  (minor) = 21.69 min,  $t_R$  (major) = 24.78 min.  $^1H$  NMR (400 MHz,  $CDCl_3$ )  $\delta$  (ppm) 7.71 – 7.69 (m, 1H), 7.53 – 7.48 (m, 1H), 7.47 – 7.43 (m, 2H), 7.35 – 7.28 (m, 3H), 6.85 (d,  $J = 8.2$  Hz, 1H), 6.03 (s, 2H), 5.84 (t,  $J = 6.3$  Hz, 1H), 2.38 (d,  $J = 6.5$  Hz, 2H), 2.04 – 1.99 (m, 2H), 1.79 – 1.75 (m, 4H).  $^{13}C$  NMR (100 MHz,  $CDCl_3$ )  $\delta$  (ppm) 164.7, 151.8, 147.7,

131.8, 128.6, 128.2, 125.6, 123.6, 122.0, 119.3, 109.5, 108.0, 101.8, 85.9, 85.8, 64.3, 34.0, 24.9, 24.2, 17.0. HRMS (EI):  $m/z$   $[M + Na]^+$  calcd for  $C_{22}H_{19}NNaO_4$ : 384.1206, found: 384.1204.

**(S)-7-cyano-1-phenylhept-1-yn-3-yl 1-naphthoate 7aq**

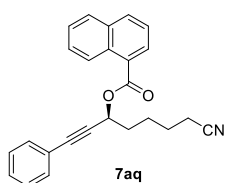

85% isolated yield (31.2 mg), colorless oil,  $[\alpha]_D^{25} = -58.20$  ( $c = 0.5$  in  $CHCl_3$ ); 99% ee, determined by HPLC analysis (Chiralpak OD column, hexane/*i*-PrOH, 90:10 v/v, flow rate 1.0 mL/min,  $\lambda = 254$  nm, 25 °C),  $t_R$  (minor) = 39.13 min,  $t_R$  (major) = 43.33 min.  $^1H$  NMR (400 MHz,  $CDCl_3$ )  $\delta$  (ppm) 8.98 (d,  $J = 8.7$  Hz, 1H), 8.26 (d,  $J = 7.2$  Hz, 1H), 8.05 (d,  $J = 8.2$  Hz, 1H), 7.90 (d,  $J = 8.1$  Hz, 1H), 7.67 – 7.63 (m, 1H), 7.58 – 7.55 (m, 1H), 7.54 – 7.48 (m, 3H), 7.35 – 7.31

(m, 3H), 6.00 (t,  $J = 6.3$  Hz, 1H), 2.44 – 2.38 (m, 2H), 2.16 – 2.07 (m, 2H), 1.85 – 1.81 (m, 4H).  $^{13}C$  NMR (100 MHz,  $CDCl_3$ )  $\delta$  (ppm) 166.3, 133.8, 133.7, 131.9, 131.4, 130.5, 128.7, 128.6, 128.3, 127.9, 126.5, 126.3, 125.6, 124.5, 122.0, 119.4, 86.0, 86.0, 64.5, 34.1, 25.0, 24.4, 17.1. HRMS (EI):  $m/z$   $[M + Na]^+$  calcd for  $C_{25}H_{21}NNaO_2$ : 390.1465, found: 390.1462.

**(S)-7-cyano-1-phenylhept-1-yn-3-yl 1-methyl-1H-indole-2-carboxylate 7ar**

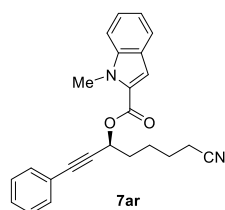

80% isolated yield (29.6 mg), colorless oil,  $[\alpha]_D^{25} = 78.17$  ( $c = 0.5$  in  $CHCl_3$ ); 89% ee, determined by HPLC analysis (Chiralpak AD column, hexane/*i*-PrOH, 80:20 v/v, flow rate 1.0 mL/min,  $\lambda = 254$  nm, 25 °C),  $t_R$  (minor) = 9.59 min,  $t_R$  (major) = 13.02 min.  $^1H$  NMR (400 MHz,  $CDCl_3$ )  $\delta$  (ppm) 7.70 (d,  $J = 7.9$  Hz, 1H), 7.51 – 7.46 (m, 2H), 7.41 – 7.37 (m, 3H), 7.35 – 7.30 (m, 3H), 7.19 – 7.15 (m, 1H), 5.88 (t,  $J = 6.3$  Hz, 1H), 4.11 (s, 3H), 2.45 – 2.39 (m, 2H), 2.10 – 2.01 (m, 2H), 1.83 – 1.80 (m, 4H).  $^{13}C$  NMR (100 MHz,  $CDCl_3$ )  $\delta$  (ppm) 161.0, 139.8, 131.9,

128.7, 128.2, 127.1, 125.7, 125.2, 122.6, 122.0, 120.6, 119.4, 110.8, 110.2, 85.9, 63.9, 34.1, 31.6, 25.0, 24.3, 17.1. HRMS (EI):  $m/z$   $[M + Na]^+$  calcd for  $C_{24}H_{22}N_2NaO_2$ : 393.1573, found: 393.1572.

**(S)-7-cyano-1-phenylhept-1-yn-3-yl 5-methylfuran-2-carboxylate 7as**

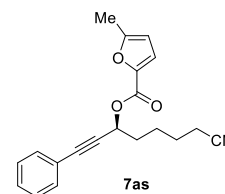

80% isolated yield (25.7mg), colorless oil,  $[\alpha]_D^{25} = 9.17$  ( $c = 0.5$  in  $CHCl_3$ ); 86% ee, determined by HPLC analysis (Chiralpak OD column, hexane/*i*-PrOH, 80:20 v/v, flow rate 1.0 mL/min,  $\lambda = 254$  nm, 25 °C),  $t_R$  (minor) = 12.28 min,  $t_R$  (major) = 15.64 min.  $^1H$  NMR (400 MHz,  $CDCl_3$ )  $\delta$  (ppm) 7.46 – 7.43 (m, 2H), 7.30 (d,  $J = 6.6$  Hz, 3H), 7.15 (d,  $J = 3.4$  Hz, 1H), 6.13 (d,  $J = 3.4$  Hz, 1H), 5.83 (t,  $J = 6.3$  Hz, 1H), 2.38 (s, 5H), 2.03 – 1.98 (m, 2H), 1.80 – 1.70 (m, 4H).  $^{13}C$  NMR (100 MHz,  $CDCl_3$ )  $\delta$  (ppm) 157.7, 157.6, 142.4, 131.8, 128.7, 128.2, 122.0, 120.1, 119.4, 108.5,

86.0, 85.6, 64.1, 34.0, 24.9, 24.2, 17.0, 14.0. HRMS (EI):  $m/z$   $[M + Na]^+$  calcd for  $C_{20}H_{19}NNaO_3$ : 344.1257, found: 344.1253.

**(S)-7-cyano-1-phenylhept-1-yn-3-yl 5-methylthiophene-2-carboxylate 7at**

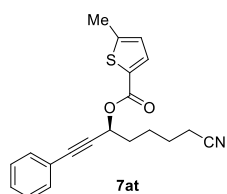

77% isolated yield (25.9 mg), colorless oil,  $[\alpha]_D^{25} = 20.53$  ( $c = 0.5$  in  $CHCl_3$ ); 91% ee, determined by HPLC analysis (Chiralpak OD column, hexane/*i*-PrOH, 80:20 v/v, flow rate 1.0 mL/min,  $\lambda = 254$  nm, 25 °C),  $t_R$  (minor) = 13.86 min,  $t_R$  (major) = 15.86 min.  $^1H$  NMR (400 MHz,  $CDCl_3$ )  $\delta$

(ppm) 7.67 (d,  $J = 3.7$  Hz, 1H), 7.46 – 7.44 (m, 2H), 7.33 – 7.28 (m, 3H), 6.81 – 6.76 (m, 1H), 5.81 (t,  $J = 6.2$  Hz, 1H), 2.53 (s, 3H), 2.39 (t,  $J = 6.6$  Hz, 2H), 2.03 - 1.98 (m, ), 1.80 – 1.74 (m, 4H).  $^{13}\text{C}$  NMR (100 MHz,  $\text{CDCl}_3$ )  $\delta$  (ppm) 161.1, 148.6, 134.4, 131.9, 130.4, 128.7, 128.2, 126.4, 122.0, 119.4, 85.9, 85.8, 64.4, 34.0, 25.0, 24.2, 17.1, 15.8. HRMS (EI):  $m/z$   $[\text{M} + \text{Na}]^+$  calcd for  $\text{C}_{20}\text{H}_{19}\text{NNaO}_2\text{S}$ : 360,1029, found: 360,1028.

**(S)-7-cyano-1-phenylhept-1-yn-3-yl 3,3-dimethylbutanoate 8aa**

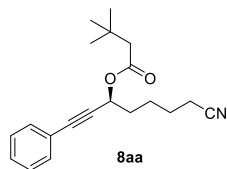

84% isolated yield (26.1 mg), colorless oil,  $[\alpha]_{\text{D}}^{25} = -20.23$  ( $c = 0.5$  in  $\text{CHCl}_3$ ); 88% ee, determined by HPLC analysis (Chiralpak OD column, hexane/*i*-PrOH, 90:10 v/v, flow rate 1.0 mL/min,  $\lambda = 254$  nm, 25 °C),  $t_{\text{R}}$  (major) = 11.74 min,  $t_{\text{R}}$  (minor) = 13.20 min.  $^1\text{H}$  NMR (400 MHz,  $\text{CDCl}_3$ )  $\delta$  (ppm) 7.43 – 7.41 (m, 2H), 7.33 – 7.28 (m, 3H), 5.61 (t,  $J = 6.3$  Hz, 1H), 2.38 (t,  $J = 6.7$  Hz, 2H), 2.25 (d,  $J = 3.2$  Hz, 2H), 1.94 – 1.83 (m, 2H), 1.78 – 1.67 (m, 4H), 1.06 (s, 9H).  $^{13}\text{C}$  NMR (100 MHz,  $\text{CDCl}_3$ )  $\delta$  (ppm) 171.2, 131.7, 128.6, 128.2, 122.0, 119.4, 86.0, 85.4, 63.3, 47.8, 33.8, 31.0, 29.6, 24.9, 24.2, 17.0. HRMS (EI):  $m/z$   $[\text{M} + \text{Na}]^+$  calcd for  $\text{C}_{20}\text{H}_{25}\text{NNaO}_2$ : 334.1778, found: 334.1776.

**(S)-7-cyano-1-phenylhept-1-yn-3-yl pent-4-enoate 8ab**

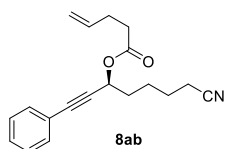

83% isolated yield (24.5 mg), colorless oil,  $[\alpha]_{\text{D}}^{25} = -30.60$  ( $c = 0.5$  in  $\text{CHCl}_3$ ); 96% ee, determined by HPLC analysis (Chiralpak IG column, hexane/*i*-PrOH, 90:10 v/v, flow rate 1.0 mL/min,  $\lambda = 254$  nm, 25 °C),  $t_{\text{R}}$  (minor) = 12.94 min,  $t_{\text{R}}$  (major) = 14.93 min.  $^1\text{H}$  NMR (400 MHz,  $\text{CDCl}_3$ )  $\delta$  (ppm) 7.44 – 7.42 (m, 2H), 7.34 – 7.27 (m, 3H), 5.89 – 5.76 (m, 1H), 5.64 (t,  $J = 6.4$  Hz, 1H), 5.13 – 4.99 (m, 2H), 2.52 – 2.45 (m, 2H), 2.43 – 2.35 (m, 4H), 1.91 – 1.86 (m, , 2H), 1.78 – 1.67 (m, 4H).  $^{13}\text{C}$  NMR (100 MHz,  $\text{CDCl}_3$ )  $\delta$  (ppm) 171.9, 136.3, 131.8, 128.7, 128.2, 121.9, 119.4, 115.6, 85.8, 85.6, 63.7, 33.9, 33.4, 28.7, 24.9, 24.1, 17.0. HRMS (EI):  $m/z$   $[\text{M} + \text{Na}]^+$  calcd for  $\text{C}_{19}\text{H}_{21}\text{NNaO}_2$ : 318.1465, found: 318.1466.

**(S)-7-cyano-1-phenylhept-1-yn-3-yl hept-6-ynoate 8ac**

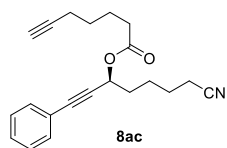

83% isolated yield (26.7 mg), colorless oil,  $[\alpha]_{\text{D}}^{25} = -40.83$  ( $c = 0.5$  in  $\text{CHCl}_3$ ); 95% ee, determined by HPLC analysis (Chiralpak IG column, hexane/*i*-PrOH, 90:10 v/v, flow rate 1.0 mL/min,  $\lambda = 254$  nm, 25 °C),  $t_{\text{R}}$  (minor) = 17.82 min,  $t_{\text{R}}$  (major) = 22.11 min.  $^1\text{H}$  NMR (400 MHz,  $\text{CDCl}_3$ )  $\delta$  (ppm) 7.45 – 7.42 (m, 2H), 7.31 (d,  $J = 6.6$  Hz, 3H), 5.63 (t,  $J = 6.4$  Hz, 1H), 2.41 – 2.37 (m, 4H), 2.24 – 2.20 (m, 2H), 1.95 (t,  $J = 2.7$  Hz, 1H), 1.92 – 1.86 (m, 2H), 1.80 - 1.68 (m, 6H), 1.62 – 1.55 (m, 2H).  $^{13}\text{C}$  NMR (100 MHz,  $\text{CDCl}_3$ )  $\delta$  (ppm) 172.3, 131.8, 128.7, 128.2, 121.9, 119.4, 85.8, 85.6, 83.8, 77.3, 77.0, 76.7, 68.6, 63.7, 33.9, 33.7, 27.7, 24.9, 24.2, 23.9, 18.1, 17.1. HRMS (EI):  $m/z$   $[\text{M} + \text{Na}]^+$  calcd for  $\text{C}_{21}\text{H}_{23}\text{N}_2\text{NaO}_2$ : 344.1621, found: 344.1618.

**(S)-7-cyano-1-phenylhept-1-yn-3-yl 3-phenylpropanoate 8ad**

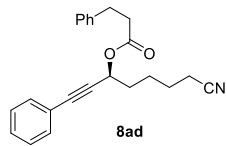

75% isolated yield (35.4 mg), colorless oil,  $[\alpha]_{\text{D}}^{25} = -60.73$  ( $c = 0.5$  in  $\text{CHCl}_3$ ); 90% ee, determined by HPLC analysis (Chiralpak AD column, hexane/*i*-PrOH, 80:20 v/v, flow rate 1.0 mL/min,  $\lambda = 254$  nm, 25 °C),  $t_{\text{R}}$  (minor) = 7.92 min,  $t_{\text{R}}$  (major) = 8.64 min.  $^1\text{H}$  NMR (400 MHz,  $\text{CDCl}_3$ )  $\delta$  (ppm) 7.37 – 7.35 (m, 2H), 7.26 - 7.22 (m, 3H), 7.21 - 7.20 (m, 1H), 7.19 (d,  $J = 2.3$  Hz, 1H), 7.17 – 7.10 (m, 3H), 5.55 (t,  $J = 6.3$  Hz, 1H), 2.91 (t,  $J = 7.7$  Hz, 2H), 2.65 - 2.60 (m, 2H), 2.26 (t,  $J = 7.0$  Hz, 2H), 1.79 - 1.74 (m, 2H), 1.65 – 1.58 (m, 2H), 1.57 – 1.50 (m, 2H).  $^{13}\text{C}$  NMR (100 MHz,  $\text{CDCl}_3$ )  $\delta$  (ppm) 171.8, 140.2, 131.8, 128.7, 128.4, 128.3, 128.2, 126.2, 121.9, 119.4, 85.8, 85.7, 63.8, 35.8, 33.9, 30.8, 24.9, 24.1, 17.0. HRMS (EI):  $m/z$   $[\text{M} + \text{Na}]^+$  calcd for  $\text{C}_{23}\text{H}_{23}\text{NNaO}_2$ : 368.1621, found: 368.1620.

**(S)-7-cyano-1-phenylhept-1-yn-3-yl cyclobutanecarboxylate 8ae**

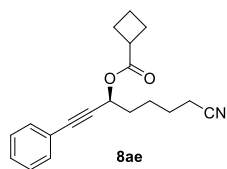

85% isolated yield (25.1 mg), colorless oil,  $[\alpha]_{\text{D}}^{25} = -22.30$  ( $c = 0.5$  in  $\text{CHCl}_3$ ); 98% ee, determined by HPLC analysis (Chiralpak IG column, hexane/*i*-PrOH, 80:20 v/v, flow rate 1.0 mL/min,  $\lambda = 254$  nm, 25 °C),  $t_{\text{R}}$  (minor) = 8.63 min,  $t_{\text{R}}$  (major) = 9.37 min.  $^1\text{H}$  NMR (400 MHz,

CDCl<sub>3</sub>)  $\delta$  (ppm) 7.45 - 7.42 (m, 2H), 7.33 - 7.28 (m, 3H), 5.62 (t,  $J$  = 6.4 Hz, 1H), 3.23 - 3.13 (m, 1H), 2.38 (t,  $J$  = 6.8 Hz, 2H), 2.35 - 2.27 (m, 2H), 2.25 - 2.20 (m, 2H), 2.00 - 1.86 (m, 4H), 1.79 - 1.67 (m, 4H). <sup>13</sup>C NMR (100 MHz, CDCl<sub>3</sub>)  $\delta$  (ppm) 174.3, 131.8, 128.6, 128.2, 122.0, 119.4, 86.0, 85.5, 63.6, 37.9, 33.9, 25.2, 25.0, 24.9, 24.1, 18.3, 17.0. HRMS (EI):  $m/z$  [M + Na]<sup>+</sup> calcd for C<sub>19</sub>H<sub>21</sub>NNaO<sub>2</sub>: 318.1465, found: 318.1466.

**(S)-7-cyano-1-phenylhept-1-yn-3-yl cyclopentanecarboxylate 8af**

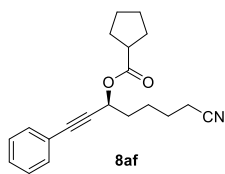

87% isolated yield (26.9 mg), colorless oil,  $[\alpha]_D^{25}$  = -16.50 ( $c$  = 0.5 in CHCl<sub>3</sub>); 92% ee, determined by HPLC analysis (Chiralpak IG column, hexane/*i*-PrOH, 80:20 v/v, flow rate 0.5 mL/min,  $\lambda$  = 254 nm, 25 °C),  $t_R$  (minor) = 17.67 min,  $t_R$  (major) = 19.57 min. <sup>1</sup>H NMR (400 MHz, CDCl<sub>3</sub>)  $\delta$  (ppm) 7.44 - 7.42 (m, 2H), 7.35 - 7.28 (m, 3H), 5.62 (t,  $J$  = 6.4 Hz, 1H), 2.82 - 2.74 (m, 1H), 2.38 (t,  $J$  = 6.8 Hz, 2H), 1.93 - 1.83 (m, 6H), 1.76 - 1.67 (m, 6H), 1.60 - 1.56 (m, 2H). <sup>13</sup>C NMR (100 MHz, CDCl<sub>3</sub>)  $\delta$  (ppm) 175.6, 131.8, 128.6, 128.2, 122.0, 119.4, 86.0, 85.4, 77.3, 77.0, 76.7, 63.5, 43.6, 33.9, 30.0, 29.8, 25.8, 25.7, 24.9, 24.1, 17.0. HRMS (EI):  $m/z$  [M + Na]<sup>+</sup> calcd for C<sub>20</sub>H<sub>23</sub>NNaO<sub>2</sub>: 332.1621, found: 332.1615.

**(S)-7-cyano-1-phenylhept-1-yn-3-yl cyclohexanecarboxylate 8ag**

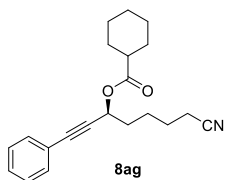

82% isolated yield (26.5 mg), colorless oil,  $[\alpha]_D^{25}$  = -22.43 ( $c$  = 0.5 in CHCl<sub>3</sub>); 96% ee, determined by HPLC analysis (Chiralpak IG column, hexane/*i*-PrOH, 90:10 v/v, flow rate 1.0 mL/min,  $\lambda$  = 254 nm, 25 °C),  $t_R$  (minor) = 12.40 min,  $t_R$  (major) = 14.28 min. <sup>1</sup>H NMR (400 MHz, CDCl<sub>3</sub>)  $\delta$  (ppm) 7.44 - 7.42 (m, 2H), 7.33 - 7.28 (m, 3H), 5.62 (t,  $J$  = 6.3 Hz, 1H), 2.38 (t,  $J$  = 6.8 Hz, 3H), 1.96 - 1.85 (m, 4H), 1.80 - 1.73 (m, 3H), 1.73 - 1.68 (m, 2H), 1.68 - 1.61 (m, 2H), 1.52 - 1.42 (m, 2H), 1.35 - 1.22 (m, 3H). <sup>13</sup>C NMR (100 MHz, CDCl<sub>3</sub>)  $\delta$  (ppm) 174.9, 131.8, 128.6, 128.2, 122.0, 119.4, 86.0, 85.4, 63.3, 43.0, 33.9, 28.9, 28.7, 25.6, 25.3, 25.2, 24.9, 24.1, 17.0. HRMS (EI):  $m/z$  [M + Na]<sup>+</sup> calcd for C<sub>21</sub>H<sub>25</sub>NNaO<sub>2</sub>: 346.1778, found: 346.1780.

**(S)-7-cyano-1-phenylhept-1-yn-3-yl (3S,5S,7S)-adamantane-1-carboxylate 8ah**

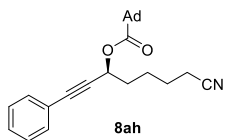

81% isolated yield (30.4 mg), colorless oil,  $[\alpha]_D^{25}$  = 25.14 ( $c$  = 0.5 in CHCl<sub>3</sub>); 90% ee, determined by HPLC analysis (Chiralpak OD column, hexane/*i*-PrOH, 80:20 v/v, flow rate 0.5 mL/min,  $\lambda$  = 254 nm, 25 °C),  $t_R$  (minor) = 19.24 min,  $t_R$  (major) = 20.78 min. <sup>1</sup>H NMR (400 MHz, CDCl<sub>3</sub>)  $\delta$  (ppm) 7.45 - 7.42 (m, 2H), 7.32 - 7.30 (m, 3H), 5.61 (t,  $J$  = 6.3 Hz, 1H), 2.38 (t,  $J$  = 6.8 Hz, 2H), 2.04 - 2.01 (m, 3H), 1.93 (d,  $J$  = 2.9 Hz, 6H), 1.79 - 1.63 (m, 12H). <sup>13</sup>C NMR (100 MHz, CDCl<sub>3</sub>)  $\delta$  (ppm) 176.4, 131.8, 128.6, 128.2, 128.1, 128.1, 122.1, 119.4, 86.2, 85.2, 77.3, 77.0, 76.7, 63.2, 40.7, 38.6, 36.4, 33.8, 27.8, 24.9, 24.1, 17.1. HRMS (EI):  $m/z$  [M + Na]<sup>+</sup> calcd for C<sub>25</sub>H<sub>29</sub>N<sub>2</sub>NaO<sub>2</sub>: 398.2091, found: 398.2098.

**3-((S)-7-cyano-1-phenylhept-1-yn-3-yl) 5-methyl tricyclo[3.1.0.0<sup>1,3</sup>]hexane-3,5-dicarboxylate 8ai**

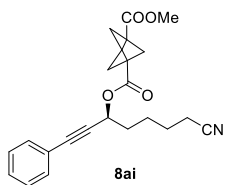

85% isolated yield (32.0 mg), colorless oil,  $[\alpha]_D^{25}$  = -31.90 ( $c$  = 0.5 in CHCl<sub>3</sub>); 96% ee, determined by HPLC analysis (Chiralpak IG column, hexane/*i*-PrOH, 80:20 v/v, flow rate 0.5 mL/min,  $\lambda$  = 254 nm, 25 °C),  $t_R$  (minor) = 25.09 min,  $t_R$  (major) = 32.21 min. <sup>1</sup>H NMR (400 MHz, CDCl<sub>3</sub>)  $\delta$  (ppm) 7.45 - 7.42 (m, 2H), 7.35 - 7.27 (m, 3H), 5.60 (t,  $J$  = 6.4 Hz, 1H), 3.68 (s, 3H), 2.40 - 2.35 (m, 8H), 1.90 (d,  $J$  = 7.5 Hz, 2H), 1.76 - 1.68 (m, 4H). <sup>13</sup>C NMR (100 MHz, CDCl<sub>3</sub>)  $\delta$  (ppm) 169.5, 168.1, 131.8, 128.8, 128.2, 121.8, 119.3, 85.9, 85.4, 64.3, 52.8, 51.8, 37.6, 37.5, 33.8, 29.6, 24.8, 24.1, 17.0. HRMS (EI):  $m/z$  [M + Na]<sup>+</sup> calcd for C<sub>23</sub>H<sub>23</sub>NNaO<sub>4</sub>: 400.1519, found: 400.1517.

**(S)-1-(7-cyano-1-phenylhept-1-yn-3-yl) 4-methyl bicyclo[2.2.2]octane-1,4-dicarboxylate 8aj**

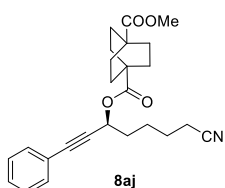

88% isolated yield (35.8 mg), colorless oil,  $[\alpha]_D^{25}$  = -34.87 ( $c$  = 0.5 in CHCl<sub>3</sub>); 98% ee, determined by HPLC analysis (Chiralpak OD column, hexane/*i*-PrOH, 90:10 v/v, flow rate 1.0 mL/min,  $\lambda$  = 254 nm, 25 °C),  $t_R$  (minor) = 38.77 min,  $t_R$  (major) = 41.71 min. <sup>1</sup>H NMR (400 MHz, CDCl<sub>3</sub>)  $\delta$  (ppm) 7.45 - 7.43 (m, 2H), 7.33 - 7.30 (m, 3H), 5.60 (t,  $J$  = 6.4 Hz, 1H), 3.69 (s,

3H), 2.37 (d,  $J = 13.9$  Hz, 8H), 1.93 – 1.87 (m, 2H), 1.79 – 1.63 (m, 5H), 1.25 (s, 2H), 0.89 – 0.85 (m, 1H).  $^{13}\text{C}$  NMR (100 MHz,  $\text{CDCl}_3$ )  $\delta$  (ppm) 169.6, 168.1, 131.9, 128.8, 128.3, 121.9, 119.3, 86.0, 85.4, 64.3, 52.8, 51.8, 37.6, 37.5, 33.8, 24.8, 24.1, 17.1. HRMS (EI):  $m/z$   $[\text{M} + \text{Na}]^+$  calcd for  $\text{C}_{25}\text{H}_{29}\text{NNaO}_4$ : 430.1989, found: 430.1985.

**(S)-7-cyano-1-phenylhept-1-yn-3-yl methyl isophthalate 8ak**

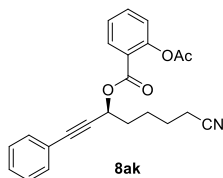

81% isolated yield, (30.4 mg), colorless oil,  $[\alpha]_{\text{D}}^{25} = -31.90$  ( $c = 0.5$  in  $\text{CHCl}_3$ ); 92% ee, determined by HPLC analysis (Chiralpak IG column, hexane/*i*-PrOH, 80:20 v/v, flow rate 1.0 mL/min,  $\lambda = 254$  nm, 25 °C),  $t_{\text{R}}$  (major) = 18.05 min,  $t_{\text{R}}$  (minor) = 20.90 min.  $^1\text{H}$  NMR (400 MHz,  $\text{CDCl}_3$ )  $\delta$  (ppm) 8.08 – 8.06 (m, 1H), 7.61 – 7.56 (m, 1H), 7.47 – 7.45 (m, 2H), 7.36 – 7.31 (m, 4H), 7.13 – 7.31 (m, 1H), 5.86 (t,  $J = 6.3$  Hz, 1H), 2.41 – 2.37 (m, 5H), 2.02 – 1.97 (m, 2H), 1.80 – 1.72 (m, 4H).  $^{13}\text{C}$  NMR (100 MHz,  $\text{CDCl}_3$ )  $\delta$  (ppm) 169.6, 163.4, 150.6, 134.1,

131.9, 131.8, 128.8, 128.3, 126.1, 123.8, 122.9, 121.9, 119.4, 86.1, 85.5, 64.6, 34.0, 24.9, 24.1, 21.1, 17.1. HRMS (EI):  $m/z$   $[\text{M} + \text{Na}]^+$  calcd for  $\text{C}_{23}\text{H}_{21}\text{NNaO}_4$ : 398.1363, found: 398.1372.

**(S)-7-cyano-1-phenylhept-1-yn-3-yl 2-(1-(4-chlorobenzoyl)-5-methoxy-1*H*-indol-3-yl)acetate 8al**

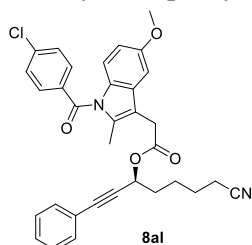

85% isolated yield (40.4 mg), colorless oil,  $[\alpha]_{\text{D}}^{25} = -54.34$  ( $c = 0.5$  in  $\text{CHCl}_3$ ); 96% ee, determined by HPLC analysis (Chiralpak AD column, hexane/*i*-PrOH, 80:20 v/v, flow rate 1.0 mL/min,  $\lambda = 254$  nm, 25 °C),  $t_{\text{R}}$  (major) = 33.42 min,  $t_{\text{R}}$  (minor) = 37.61 min.  $^1\text{H}$  NMR (400 MHz,  $\text{CDCl}_3$ )  $\delta$  (ppm) 7.66 – 7.61 (m, 2H), 7.45 – 7.43 (m, 2H), 7.39 – 7.37 (m, 2H), 7.33 – 7.27 (m, 3H), 7.00 (d,  $J = 2.5$  Hz, 1H), 6.90 (d,  $J = 8.9$  Hz, 1H), 6.69 – 6.66 (m, 1H), 5.63 (t,  $J = 6.3$  Hz, 1H), 3.80 (s, 3H), 3.73 (d,  $J = 1.5$  Hz, 2H), 2.40 (s, 3H), 2.27 (t,  $J = 6.7$  Hz, 2H), 1.90

– 1.85 (m, 2H), 1.68 – 1.56 (m, 4H).  $^{13}\text{C}$  NMR (100 MHz,  $\text{CDCl}_3$ )  $\delta$  (ppm) 169.7, 168.2, 155.9, 139.2, 135.9, 133.7, 131.7, 131.1, 130.7, 130.4, 129.0, 128.7, 128.2, 121.8, 119.3, 114.9, 112.2, 111.5, 101.3, 85.8, 85.5, 64.5, 55.5, 33.8, 30.4, 26.8, 24.8, 24.0, 16.9, 13.3. HRMS (EI):  $m/z$   $[\text{M} + \text{Na}]^+$  calcd for  $\text{C}_{32}\text{H}_{27}\text{ClNNaO}_4$ : 561.1552, found: 561.1553.

**(S)-7-cyano-1-phenylhept-1-yn-3-yl 5-(2,5-dimethylphenoxy)-2,2-dimethylpentanoate 8am**

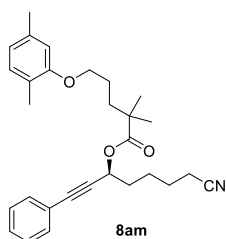

86% isolated yield (33.6 mg), colorless oil,  $[\alpha]_{\text{D}}^{25} = -29.37$  ( $c = 0.5$  in  $\text{CHCl}_3$ ); 90% ee, determined by HPLC analysis (Chiralpak IG column, hexane/*i*-PrOH, 80:20 v/v, flow rate 0.5 mL/min,  $\lambda = 254$  nm, 25 °C),  $t_{\text{R}}$  (minor) = 15.97 min,  $t_{\text{R}}$  (major) = 18.50 min.  $^1\text{H}$  NMR (400 MHz,  $\text{CDCl}_3$ )  $\delta$  (ppm) 7.45 – 7.40 (m, 2H), 7.32 – 7.26 (m, 3H), 7.01 (d,  $J = 7.5$  Hz, 1H), 6.67 (d,  $J = 7.5$  Hz, 1H), 6.60 (s, 1H), 5.63 (t,  $J = 6.4$  Hz, 1H), 3.95 – 3.91 (m, 2H), 2.37 (t,  $J = 6.7$  Hz, 2H), 2.31 (s, 3H), 2.17 (s, 3H), 1.94 – 1.89 (m, 2H), 1.83 – 1.68 (m, 8H), 1.28 (s, 6H).  $^{13}\text{C}$  NMR (100 MHz,  $\text{CDCl}_3$ )  $\delta$  (ppm) 176.6, 156.8, 136.4, 131.7, 130.2, 128.6, 128.2, 123.4, 122.1, 120.6,

119.3, 111.8, 86.0, 85.5, 67.8, 63.7, 42.1, 37.1, 33.8, 25.2, 25.1, 24.9, 24.8, 24.2, 21.3, 17.0, 15.7. HRMS (EI):  $m/z$   $[\text{M} + \text{Na}]^+$  calcd for  $\text{C}_{29}\text{H}_{35}\text{NNaO}_3$ : 468.2509, found: 468.2505.



## 5. Synthetic Applications of the Reaction

### 5.1 Gram-scale reaction

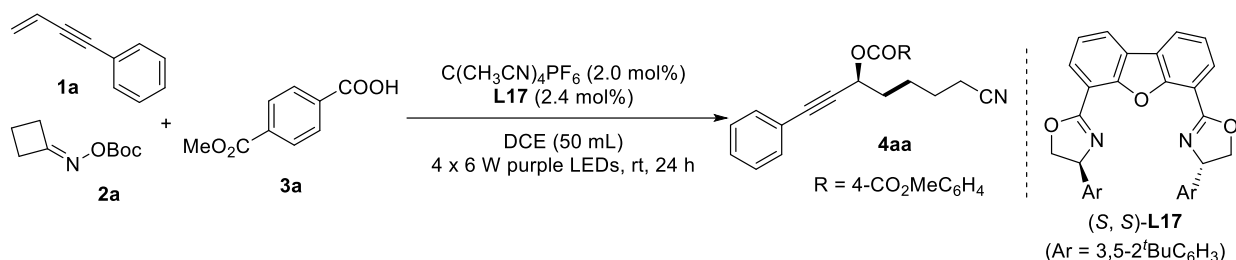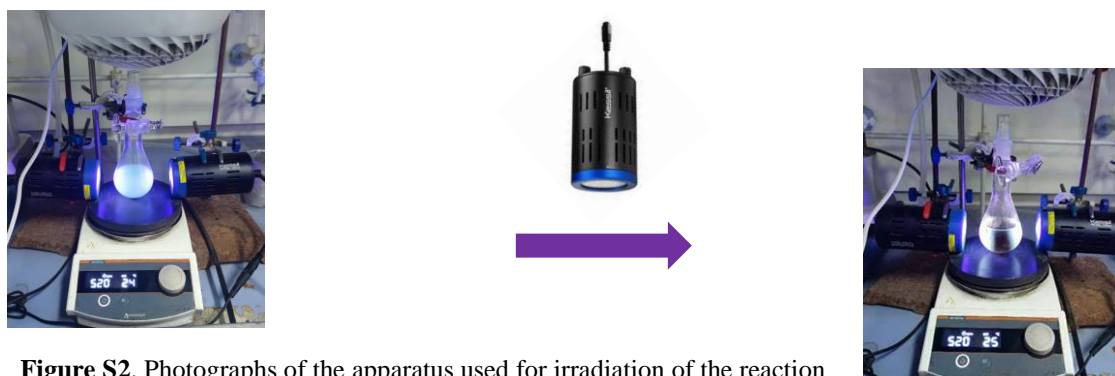

**Figure S2.** Photographs of the apparatus used for irradiation of the reaction

system.

In a flame-dried 100 mL Shrek bottle equipped with a magnetic stirrer bar was charged sequentially with  $\text{Cu}(\text{CH}_3\text{CN})_4\text{PF}_6$  (37.3 mg, 0.10 mmol) and chiral ligand **L17** (81.9 mg, 0.12 mmol), followed by the addition of DCE (50.0 mL). Then the mixture was stirred at room temperature for 30 min. To the resulting mixture, **3a** (900 mg, 5.0 mmol), **1a** (1.92 g, 15.0 mmol) and **2a** (1.85g, 10.0 mmol) were added. Then, the resulting mixture was degassed (3 times) under argon atmosphere. At last, the mixture was stirred at a distance of ~4 cm from a 20 W Kessil purple LEDs at room temperature for 36 h. The product was purified by flash column chromatography on silica gel to afford the desired product **4aa** (1.69 g, 90% yield, 93% ee) with petroleum ether and ethyl acetate (7:1, v/v).

## 6. Mechanistic Investigation

### 6.1 Radical trapping experiments

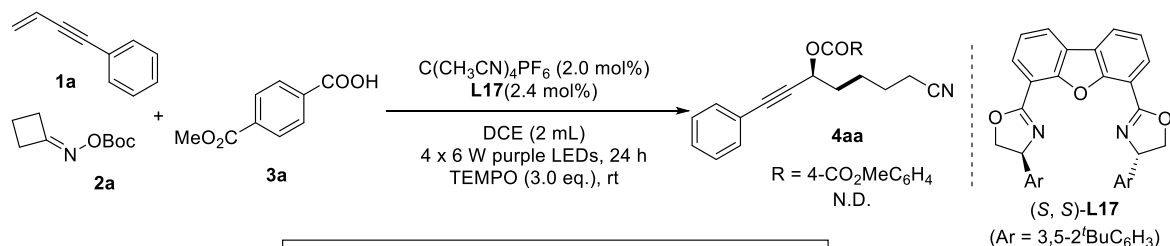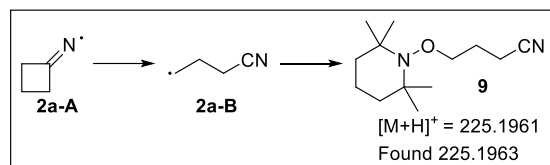

In a flame-dried 10 mL Schlenk tube equipped with a magnetic stirrer bar was charged sequentially with  $\text{Cu}(\text{CH}_3\text{CN})_4\text{PF}_6$  (0.75mg, 0.0020 mmol) and chiral ligand **L17** (1.64 mg, 0.0024 mmol), followed by the addition of DCE (2.0 mL). Then the mixture was stirred at room temperature for 30 min. To the resulting mixture, **3a** (18.0 mg, 0.10

mmol), **1a** (30.4 mg, 0.30 mmol), **2a** (37.0 mg, 0.20 mmol) and TEMPO (46.9 mg, 0.3 mmol) were added. Then, the resulting mixture was degassed (3 times) under argon atmosphere. At last, the mixture was stirred at a distance of ~1 cm from 4 x 6 W purple LEDs at room temperature for 24 h.

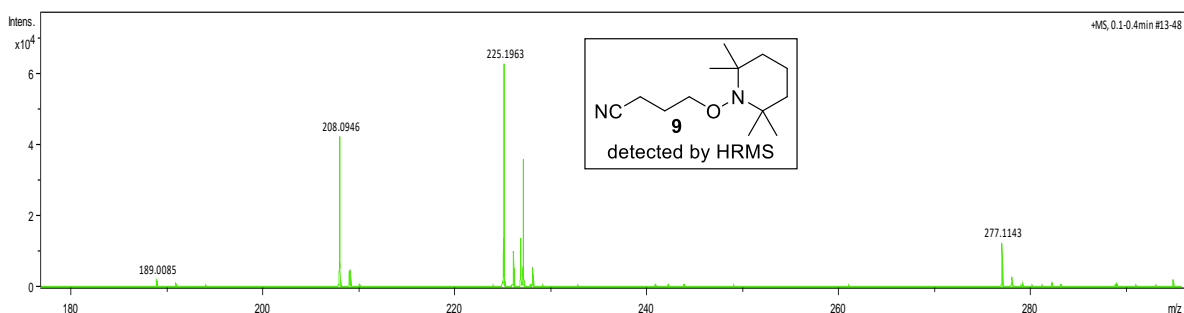

## 6.2 Non-linear effect experiments

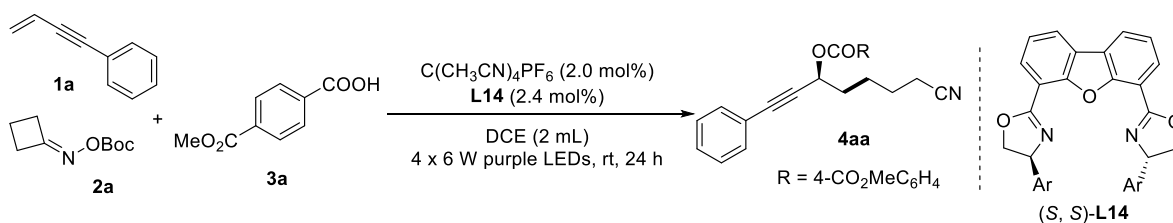

In a flame-dried 10 mL Schlenk tube equipped with a magnetic stirrer bar was charged sequentially with  $\text{Cu}(\text{CH}_3\text{CN})_4\text{PF}_6$  (0.75mg, 0.0020 mmol) and chiral ligand **L14** (1.64 mg, 0.0024 mmol), followed by the addition of DCE (2.0 mL). Then the mixture was stirred at room temperature for 30 min. To the resulting mixture, **3a** (18.0 mg, 0.10 mmol), **1a** (30.4 mg, 0.30 mmol) and **2a** (37.0 mg, 0.20 mmol) were added. Then, the resulting mixture was degassed (3 times) under argon atmosphere. At last, the mixture was stirred at a distance of ~1 cm from 4 x 6 W purple LEDs at 0 °C for 24 h. The product was purified by flash column chromatography on silica gel to afford the desired product with petroleum ether and ethyl acetate (7:1, v/v).

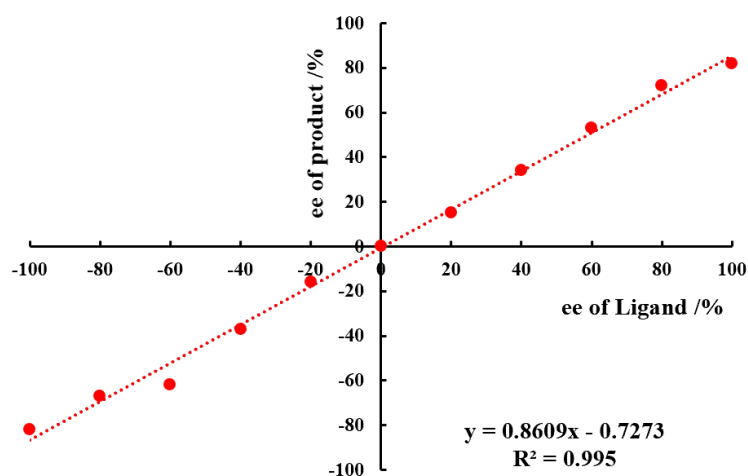

**Figure S3.** Relationship between ee values of ligand and product **4aa**

### 6.3 UV-Vis absorption spectra of the reaction components

UV vis absorption studies were conducted to probe the role of the copper salt, chiral ligand and acid under this photocatalytic system. Absorption experiments were performed on a Agilent Cary 60 UV-Vis spectrophotometer.

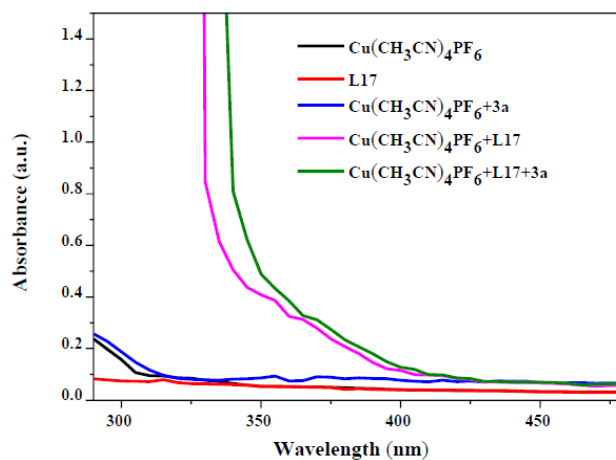

**Figure S4.** UV-Vis spectra of substrate  $\text{Cu}(\text{CH}_3\text{CN})_4\text{PF}_6$ , chiral ligand **L17**, chiral copper complexes [ $\text{Cu}(\text{CH}_3\text{CN})_4\text{PF}_6 + p\text{-COOMeC}_6\text{H}_4\text{COOH}$ ] (1:2), [ $\text{Cu}(\text{CH}_3\text{CN})_4\text{PF}_6 + \text{L17}$ ] (1:1), [ $\text{Cu}(\text{CH}_3\text{CN})_4\text{PF}_6 + \text{L17} + p\text{-COOMeC}_6\text{H}_4\text{COOH}$ ] (1:1:2) in DCE. All the samples were prepared as a 1.0 mM solution and used freshly for the measurement. All solutions were scanned from 200 to 800 nm.

**Preparation of the samples for UV-Vis spectra measurement** (All the samples were used freshly for UV-Vis spectra measurement):

**$\text{Cu}(\text{CH}_3\text{CN})_4\text{PF}_6$  in DCE (1.0 mM):**  $\text{Cu}(\text{CH}_3\text{CN})_4\text{PF}_6$  (2.68 mg, 0.0072 mmol) was dissolved in anhydrous DCE (6.0 mL).

**chiral ligand L17 in DCE (1.0 mM):** chiral ligand **L17** (4.91 mg, 0.0072 mmol) was dissolved in anhydrous DCE (6.0 mL).

**[ $\text{Cu}(\text{CH}_3\text{CN})_4\text{PF}_6 + p\text{-COOMeC}_6\text{H}_4\text{COOH}$ ] (1:2) in DCE (1.0 mM):**  $\text{Cu}(\text{CH}_3\text{CN})_4\text{PF}_6$  (2.68 mg, 0.0072 mmol),  $p\text{-COOMeC}_6\text{H}_4\text{COOH}$  (2.59 mg, 0.0144 mmol) was dissolved in anhydrous DCE (6.0 mL) and stirred at room temperature for 1 h.

**copper complexes [ $\text{Cu}(\text{CH}_3\text{CN})_4\text{PF}_6 + \text{L17}$ ] (1:1) in DCE (1.0 mM):**  $\text{Cu}(\text{CH}_3\text{CN})_4\text{PF}_6$  (2.68 mg, 0.0072 mmol) and chiral ligand **L17** (4.91 mg, 0.0072 mmol) was dissolved in anhydrous DCE (6.0 mL) and stirred at room temperature for 1 h.

**[ $\text{Cu}(\text{CH}_3\text{CN})_4\text{PF}_6 + \text{L17} + p\text{-COOMeC}_6\text{H}_4\text{COOH}$ ] (1:1:2) in DCE (1.0 mM):**  $\text{Cu}(\text{CH}_3\text{CN})_4\text{PF}_6$  (2.68 mg, 0.0072 mmol), chiral ligand **L17** (4.91 mg, 0.0072 mmol) and  $p\text{-COOMeC}_6\text{H}_4\text{COOH}$  (2.59 mg, 0.0144 mmol) was dissolved in anhydrous DCE (6.0 mL) and stirred at room temperature for 1 h.

**Remarks:** All of the individual  $p\text{-COOMeC}_6\text{H}_4\text{COOH}$ ,  $\text{Cu}(\text{CH}_3\text{CN})_4\text{PF}_6$ , chiral ligand **L17** showed no spectra feature in the visible light region. However, in situ generated chiral copper complex with acid ([ $\text{Cu}(\text{CH}_3\text{CN})_4\text{PF}_6 + \text{L17}$ ] (1:1) and [ $\text{Cu}(\text{CH}_3\text{CN})_4\text{PF}_6 + \text{L17} + p\text{-COOMeC}_6\text{H}_4\text{COOH}$ ](1:1:2)) exhibited significant absorption enhancement in the range of 350-450 nm.

## 7. Determination of the Absolute Configuration of Product **5cc**

Single crystals of  $\text{C}_{31}\text{H}_{36}\text{N}_2\text{O}_4$  (**5cc**). A suitable crystal was selected on a Bruker APEX-II CCD diffractometer. The crystal was kept at 100 K during data collection.

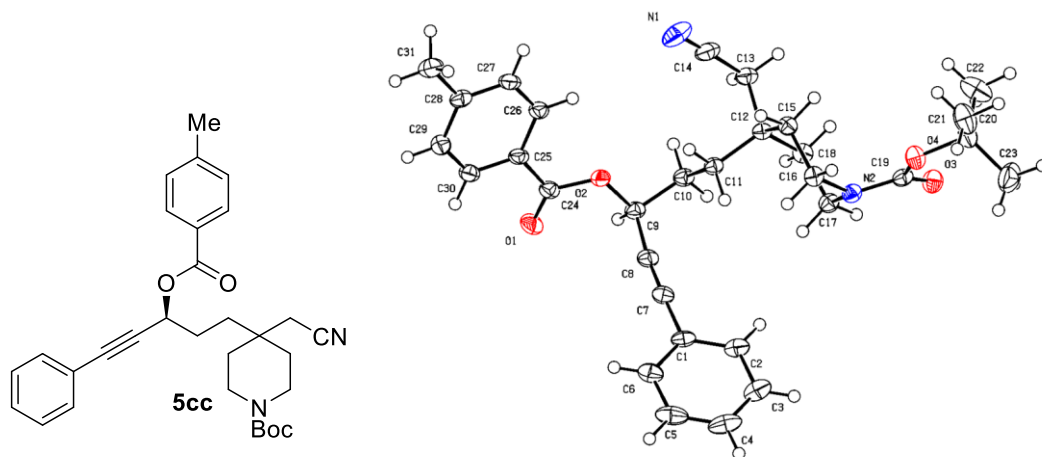

**Figure S5.** X-ray crystal structure of **5cc**

Crystal Data for  $C_{31}H_{36}N_2O_4$  ( $M = 500.62$  g/mol): monoclinic, space group  $P2_1$  (no. 4),  $a = 15.3918(2)$  Å,  $b = 5.81640(10)$  Å,  $c = 15.5214(2)$  Å,  $\beta = 94.6890(10)^\circ$ ,  $V = 1384.90(3)$  Å<sup>3</sup>,  $Z = 2$ ,  $T = 108(12)$  K,  $\mu(\text{Cu K}\alpha) = 0.631$  mm<sup>-1</sup>,  $D_{\text{calc}} = 1.201$  g/cm<sup>3</sup>, 6414 reflections measured ( $5.714^\circ \leq 2\theta \leq 143.062^\circ$ ), 3681 unique ( $R_{\text{int}} = 0.0296$ ,  $R_{\text{sigma}} = 0.0467$ ) which were used in all calculations. The final  $R_1$  was 0.0340 ( $I > 2\sigma(I)$ ) and  $wR_2$  was 0.0892 (all data).

## References

- (1) Y. Li, D. Shi, X. He, Y. Wang, Y. Tang, J. Zhang and S. Xu, Redox-Neutral Annulation of Alkynylcyclopropanes with N-Aryloxyamides via Rhodium(III)-Catalyzed Sequential C–H/C–C Activation, *J. Org. Chem.*, 2019, **84**, 1588–1595.
- (2) P.-Z. Wang, X. Wu, Y. Cheng, M. Jiang, W.-J. Xiao and J.-R. Chen, Photoinduced Copper-Catalyzed Asymmetric Three-Component Coupling of 1,3-Dienes: An Alternative to Kharasch–Sosnovsky Reaction, *Angew. Chem. Int. Ed.*, 2021, **60**, 22956–22962.
- (3) (a) M.-C. Ye, B. Li, J. Zhou, X.-L. Sun and Y. Tang, Modular Synthesis of Chiral Homo- and Heterotrissoxazolines.† Improving the Enantioselectivity in the Asymmetric Michael Addition of Indole to Benzylidene Malonate, *J. Org. Chem.*, 2005, **70**, 6108–6110. (b) W. Zhang, L. Wu, P. Chen and G. Liu, Enantioselective Arylation of Benzylic C–H Bonds by Copper-Catalyzed Radical Relay, *Angew. Chem. Int. Ed.*, 2019, **58**, 6425–6429.
- (4) (a) B. Li, Z. Chao, C. Li and Z. Gu, Cu-Catalyzed Enantioselective Ring Opening of Cyclic Diaryliodoniums toward the Synthesis of Chiral Diarylmethanes, *J. Am. Chem. Soc.*, 2018, **140**, 9400–9403. (b) S.-S. Li and J.-B. Wang, Cu(I)/Chiral Bisoxazoline-Catalyzed Enantioselective Sommelet–Hauser Rearrangement of Sulfonium Ylides, *J. Org. Chem.*, 2020, **85**, 12343–12358.
- (5) L. Ge, H. Zhou, M.-F. Chiou, H. Jiang, W. Jian, C. Ye, X. Li, X. Zhu, H. Xiong, Y. Li, L. Song, X. Zhang, and H. Bao, Iron-catalysed asymmetric carboazidation of styrenes, *Nat. Catal.*, 2021, **4**, 28–35.

## 8. Copies of NMR Spectra

$^1\text{H}$  NMR (400 MHz,  $\text{CDCl}_3$ ) and  $^{13}\text{C}$  NMR (100 MHz,  $\text{CDCl}_3$ ) spectra of product L17

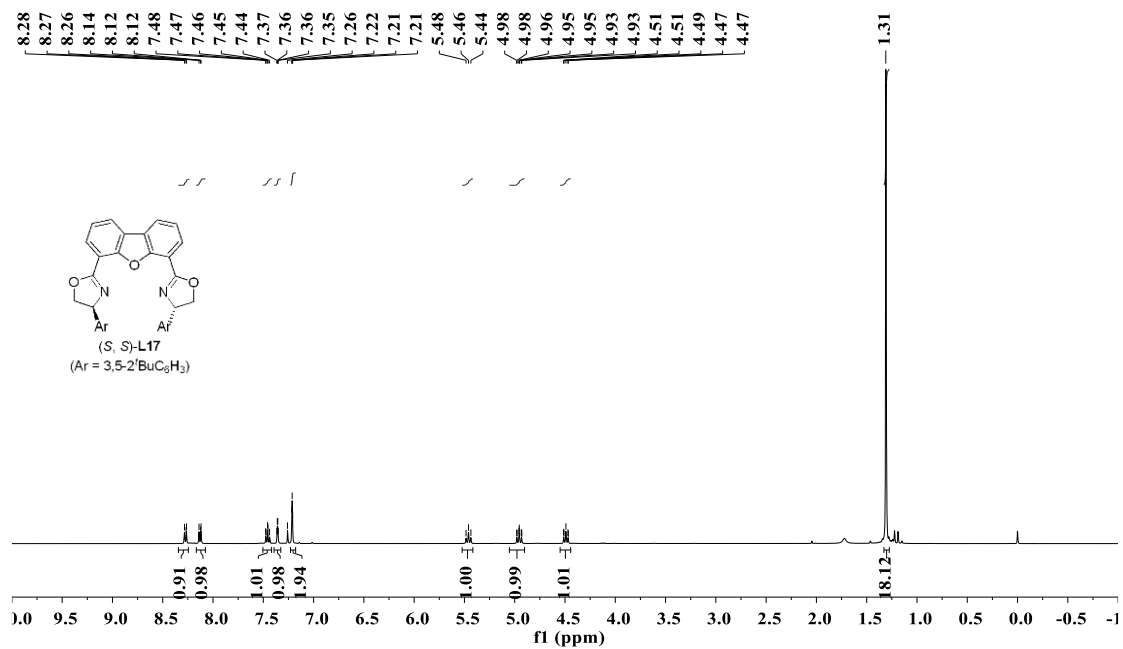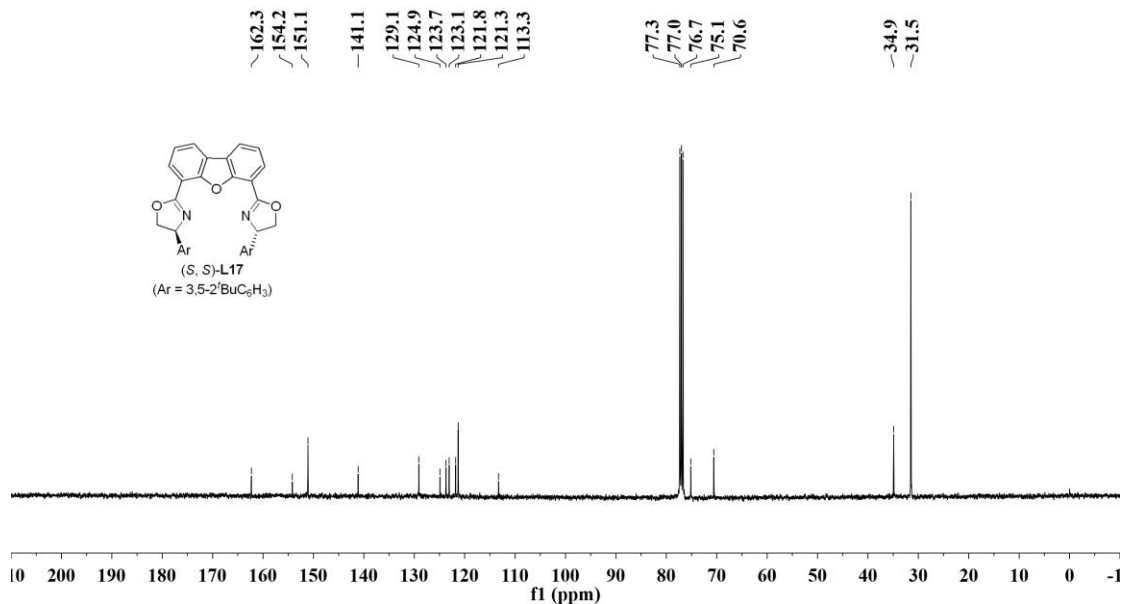

<sup>1</sup>H NMR (400 MHz, CDCl<sub>3</sub>) and <sup>13</sup>C NMR (100 MHz, CDCl<sub>3</sub>) spectra of product 4aa

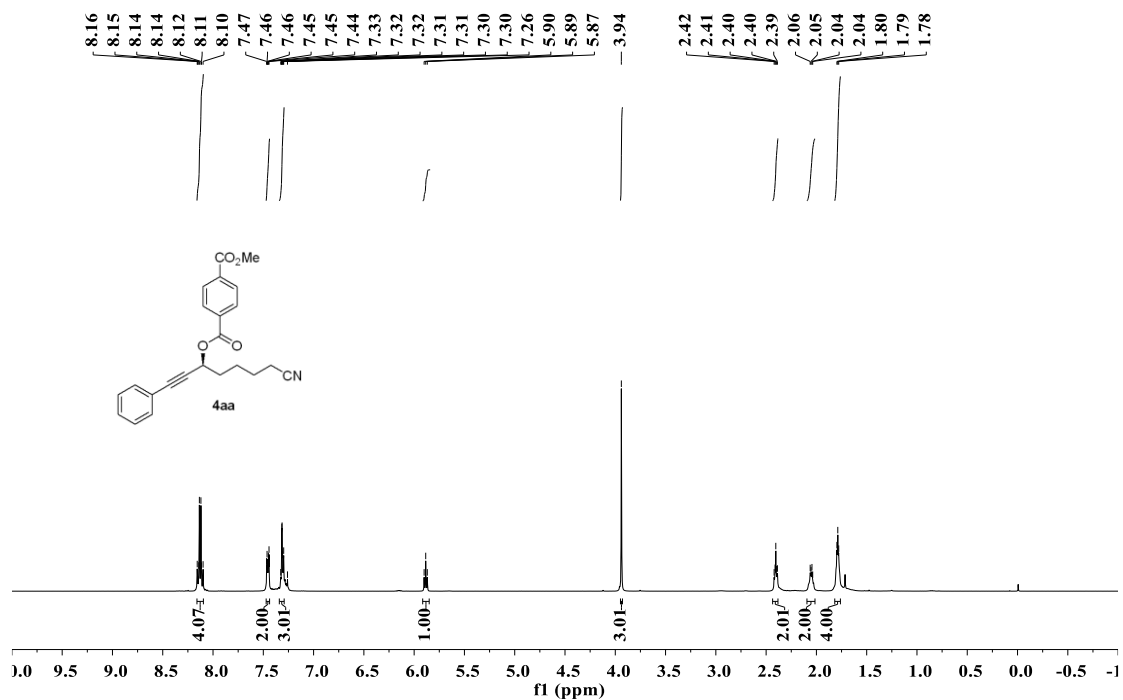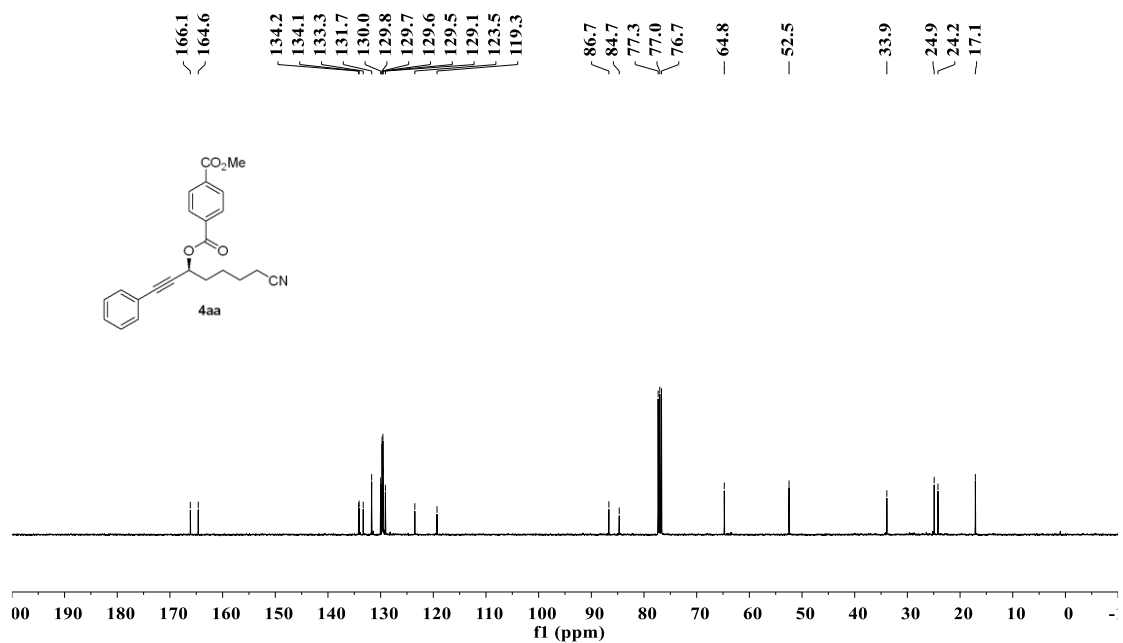

<sup>1</sup>H NMR (400 MHz, CDCl<sub>3</sub>) and <sup>13</sup>C NMR (100 MHz, CDCl<sub>3</sub>) spectra of product 4ba

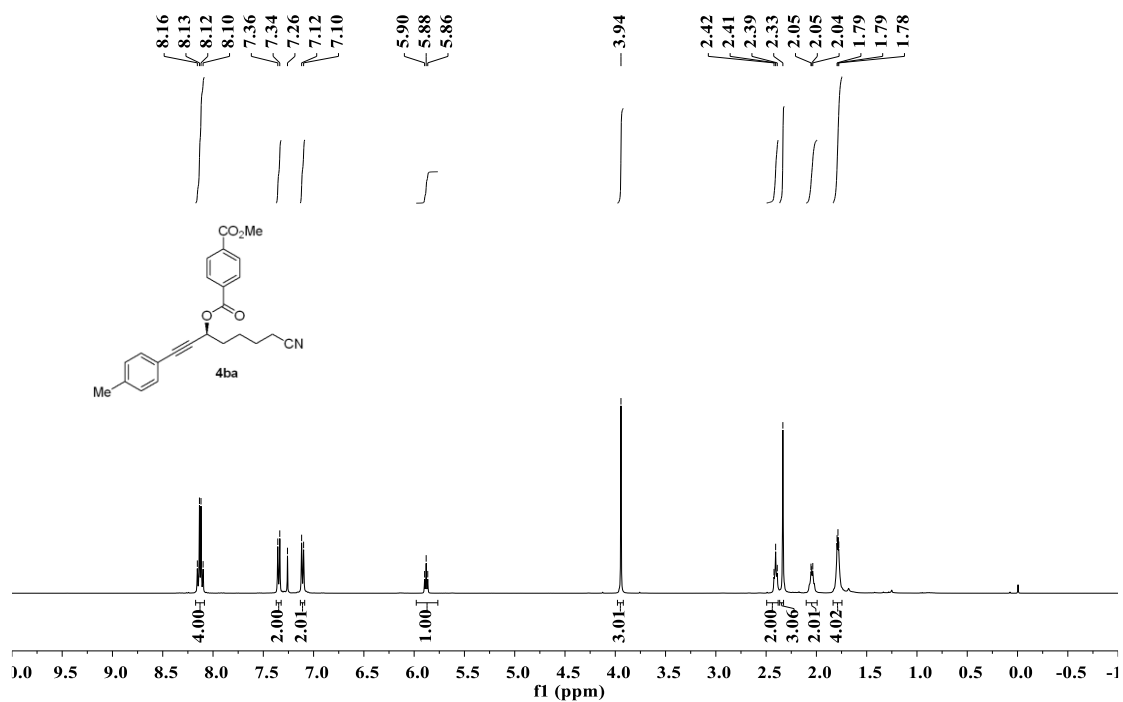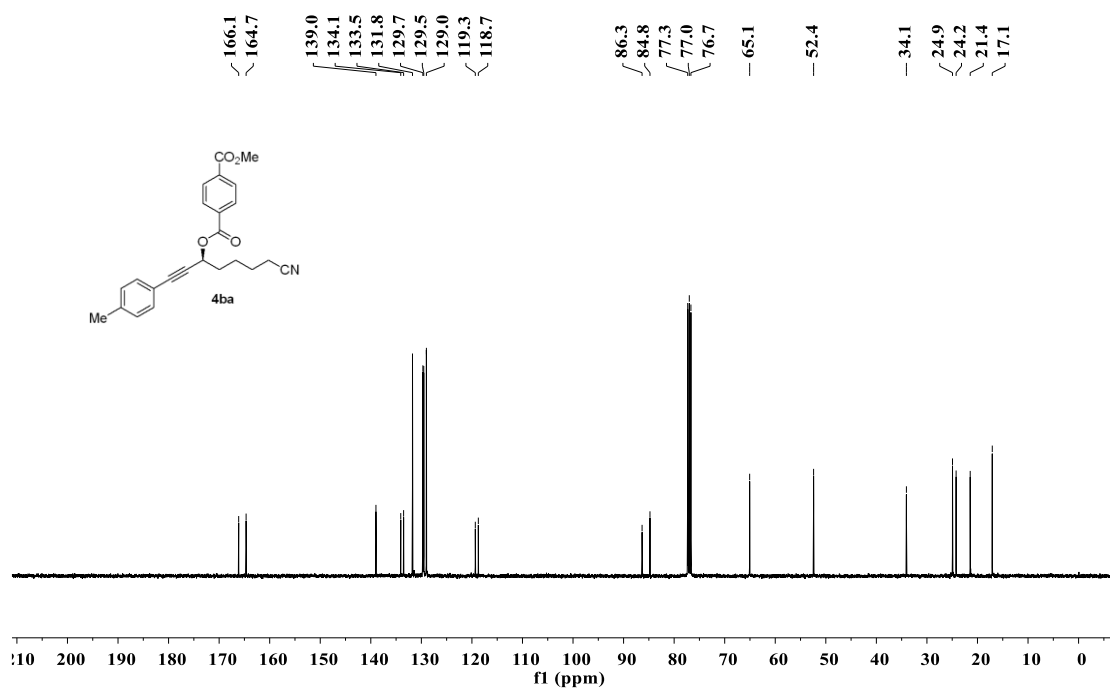

<sup>1</sup>H NMR (400 MHz, CDCl<sub>3</sub>) and <sup>13</sup>C NMR (100 MHz, CDCl<sub>3</sub>) spectra of product 4ca

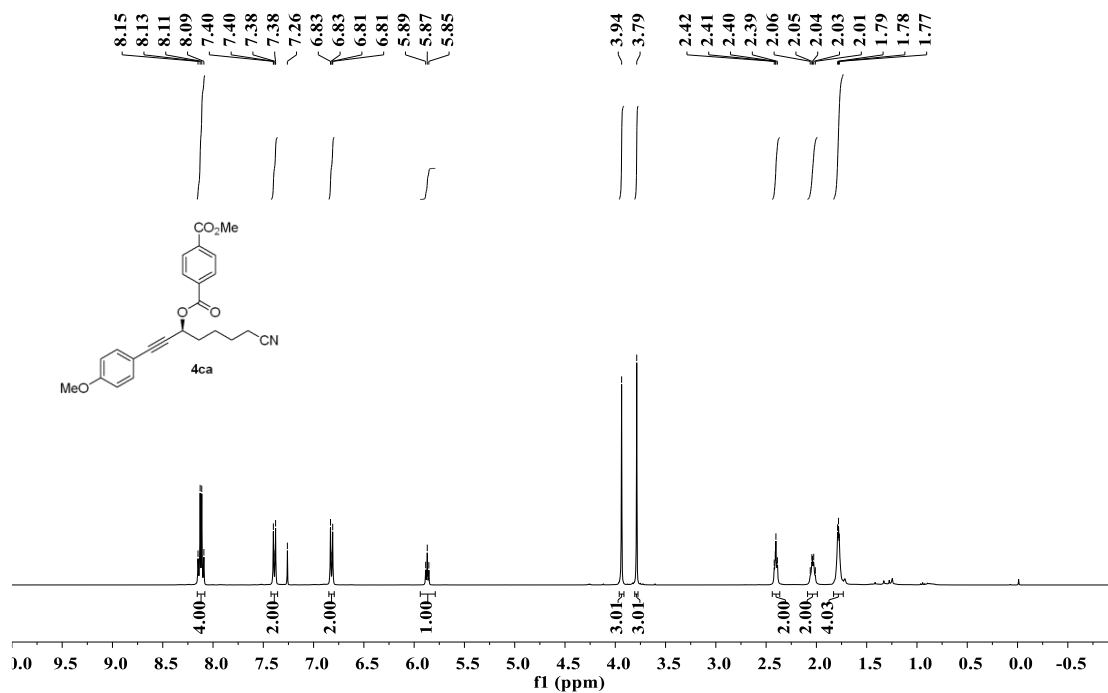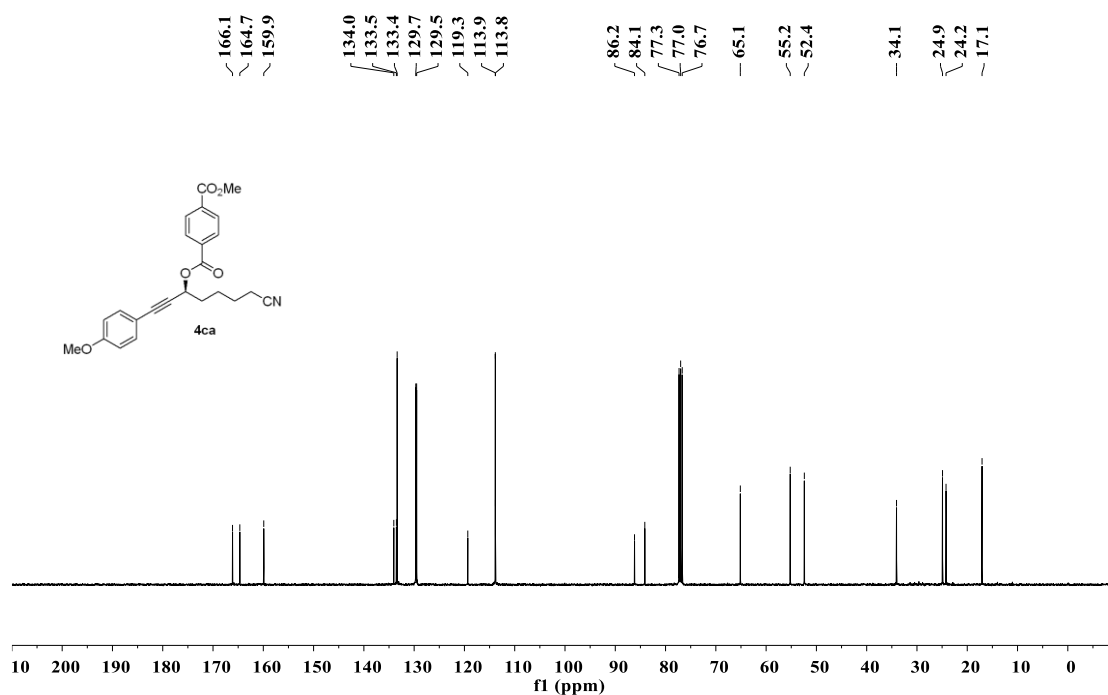



<sup>1</sup>H NMR (400 MHz, CDCl<sub>3</sub>) and <sup>13</sup>C NMR (100 MHz, CDCl<sub>3</sub>) spectra of product 4da

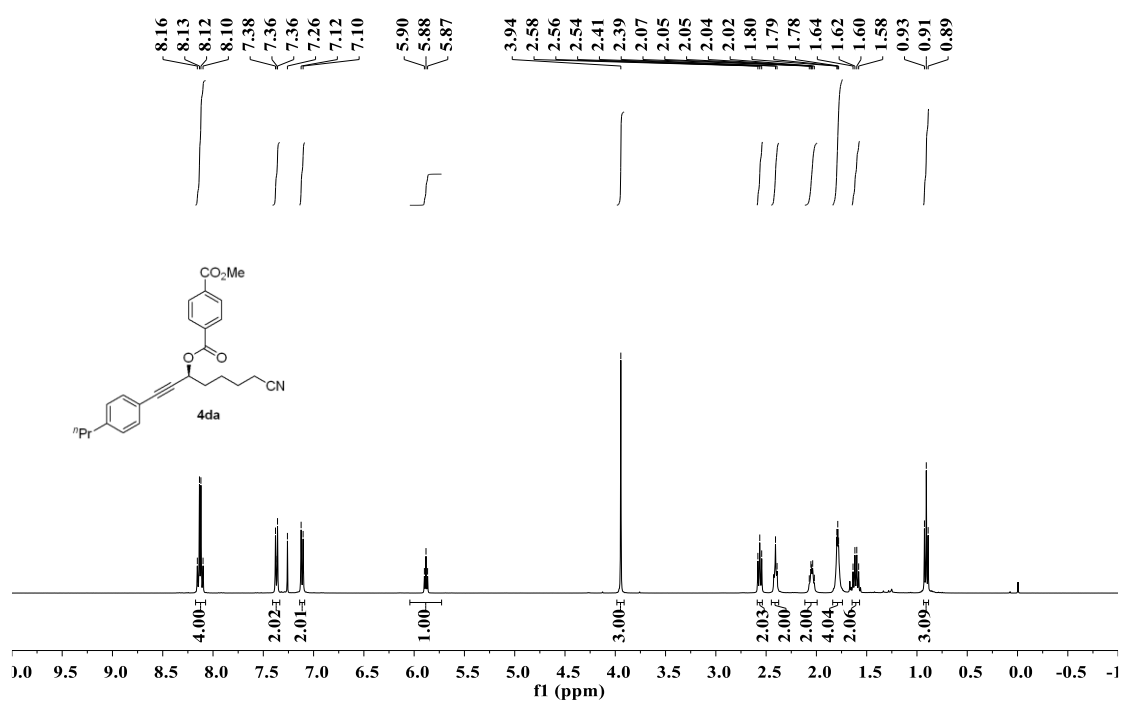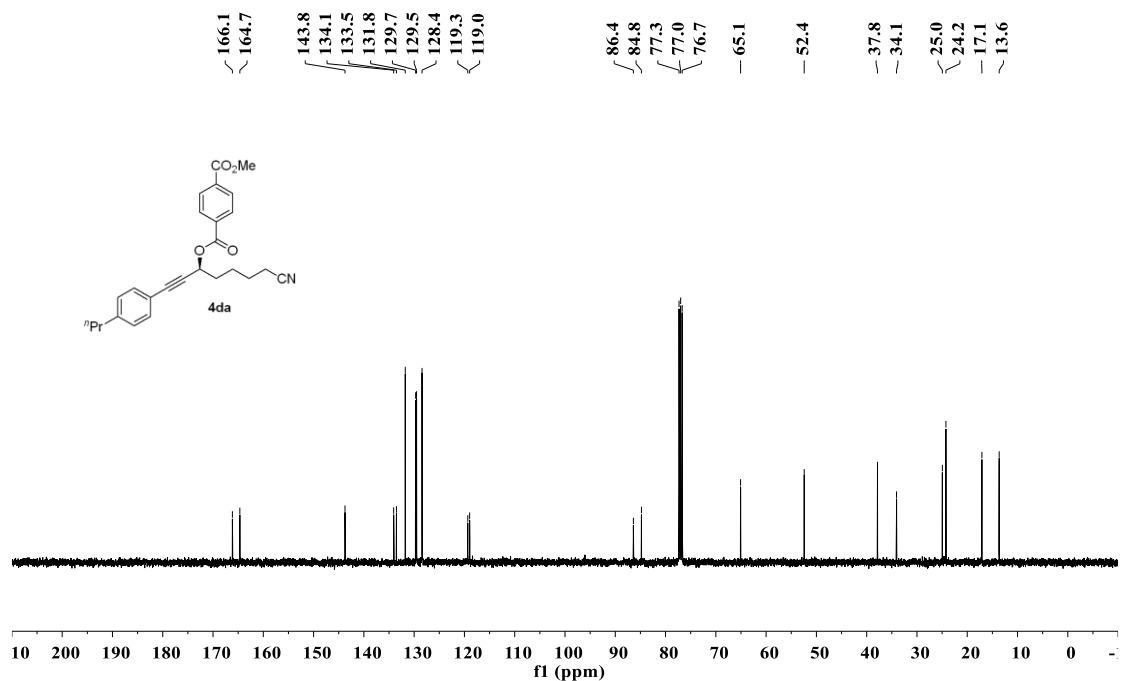

<sup>1</sup>H NMR (400 MHz, CDCl<sub>3</sub>) and <sup>13</sup>C NMR (100 MHz, CDCl<sub>3</sub>) spectra of product 4ea

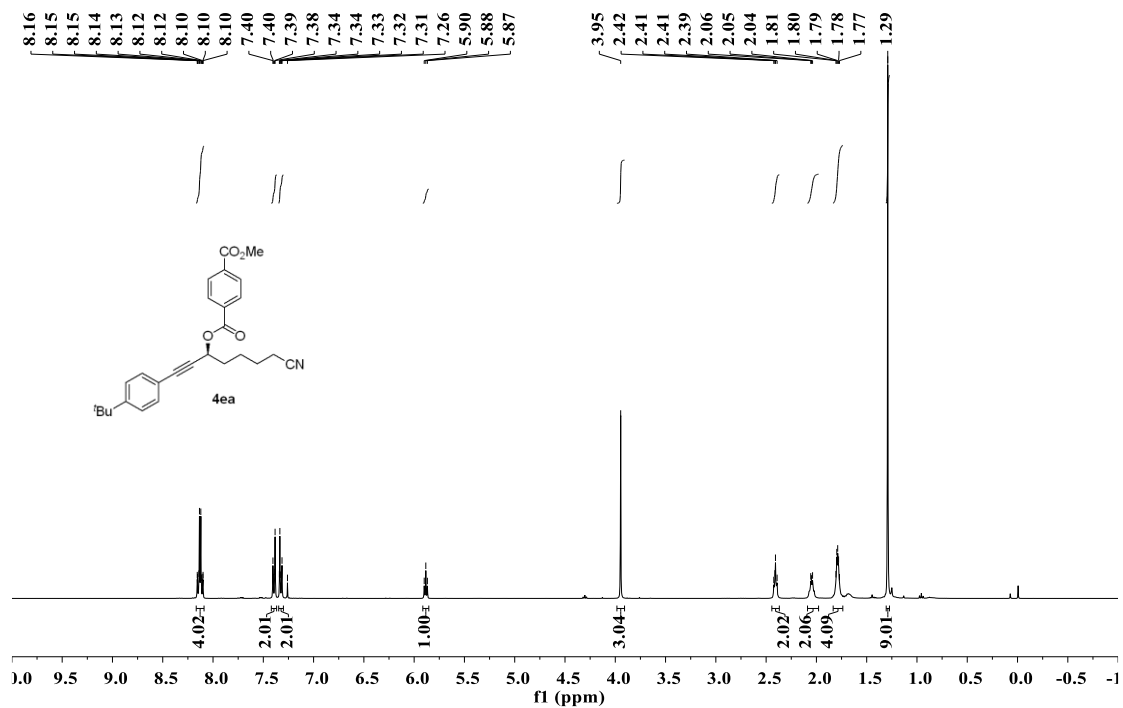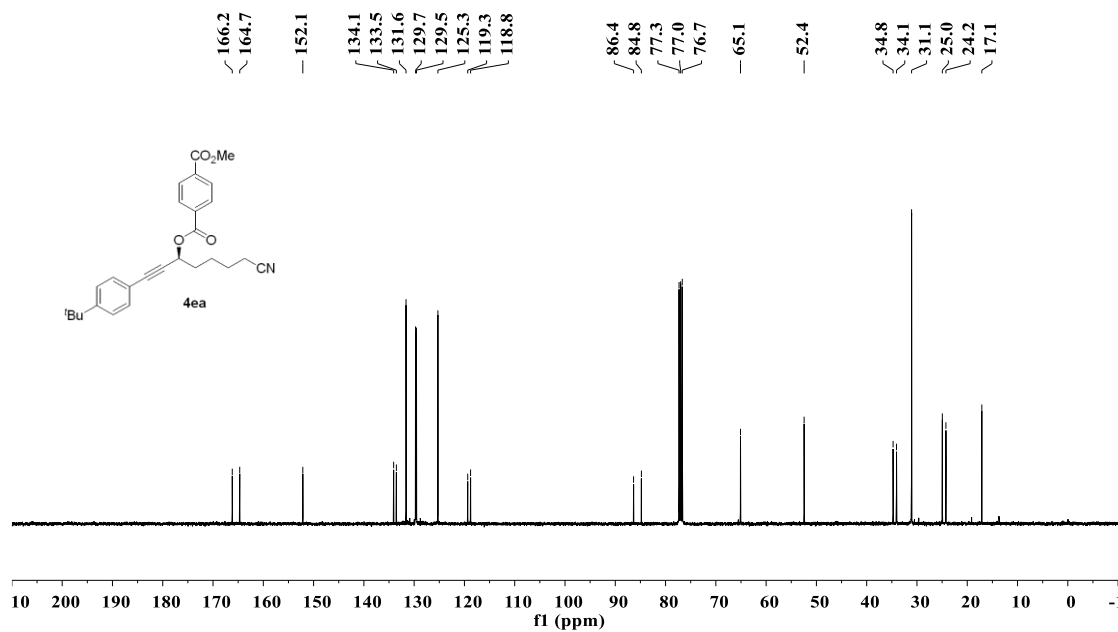

<sup>1</sup>H NMR (400 MHz, CDCl<sub>3</sub>) and <sup>13</sup>C NMR (100 MHz, CDCl<sub>3</sub>) spectra of product 4fa

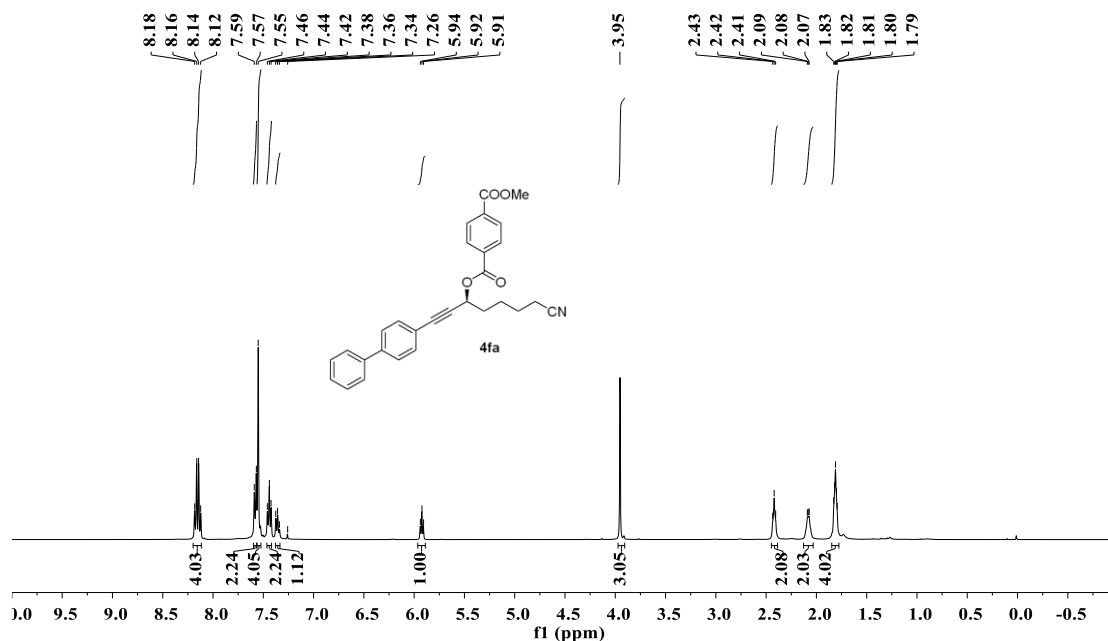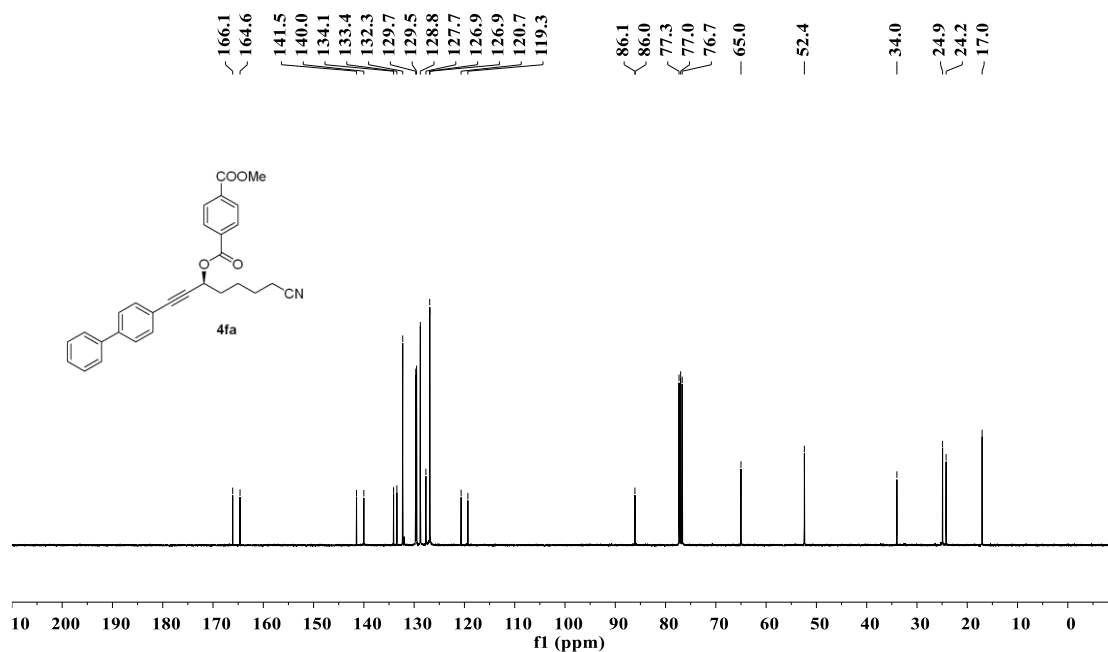

<sup>1</sup>H NMR (400 MHz, CDCl<sub>3</sub>), <sup>13</sup>C NMR (100 MHz, CDCl<sub>3</sub>) and <sup>19</sup>F (376 MHz) spectra of product **4ga**

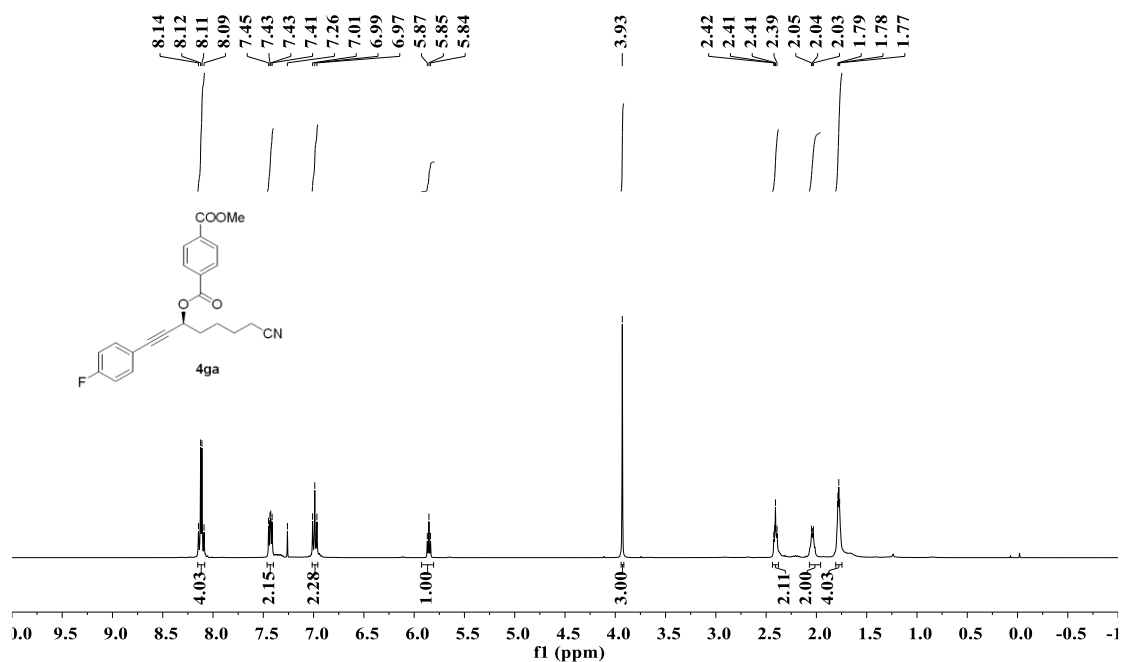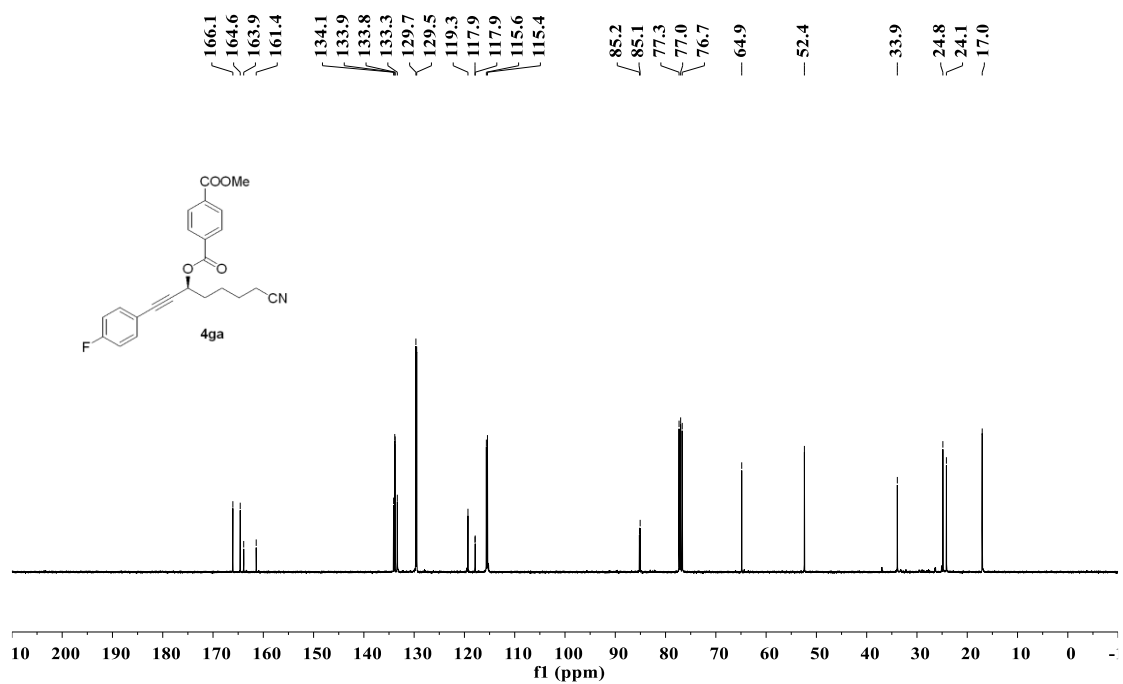

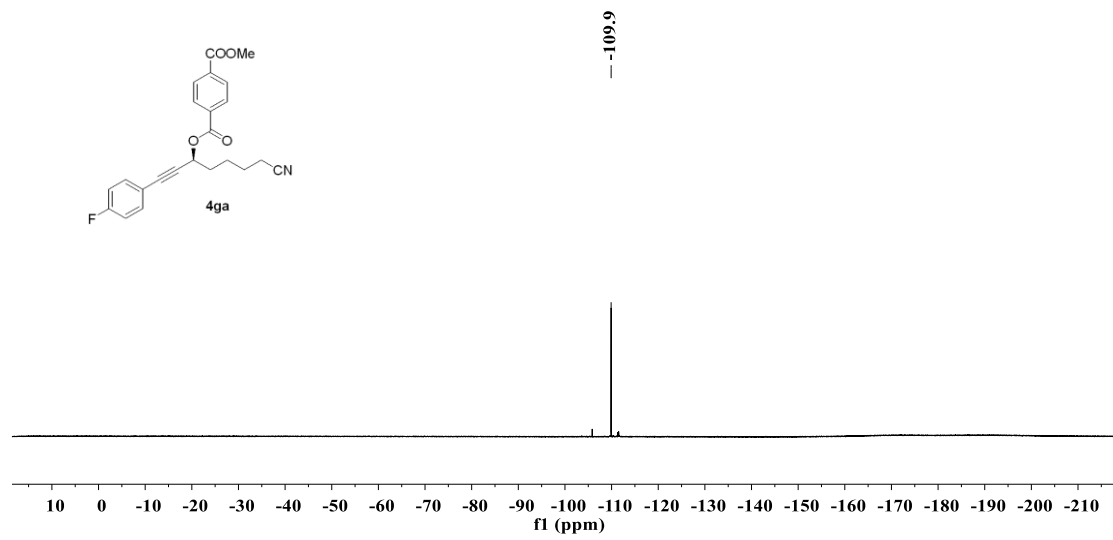

<sup>1</sup>H NMR (400 MHz, CDCl<sub>3</sub>) and <sup>13</sup>C NMR (100 MHz, CDCl<sub>3</sub>) spectra of product 4ha

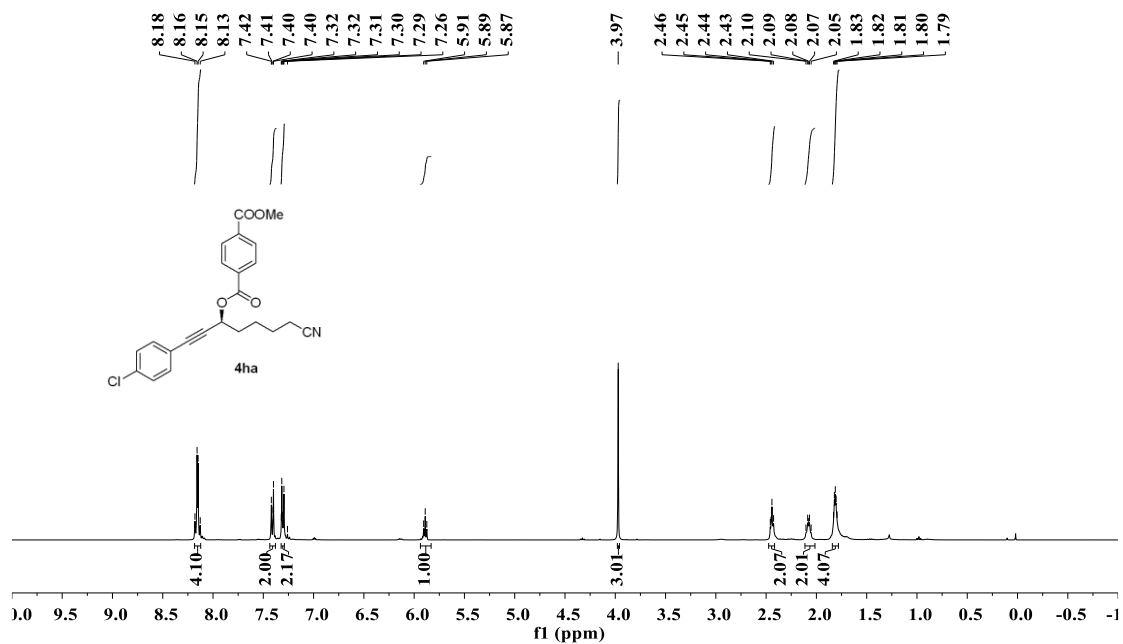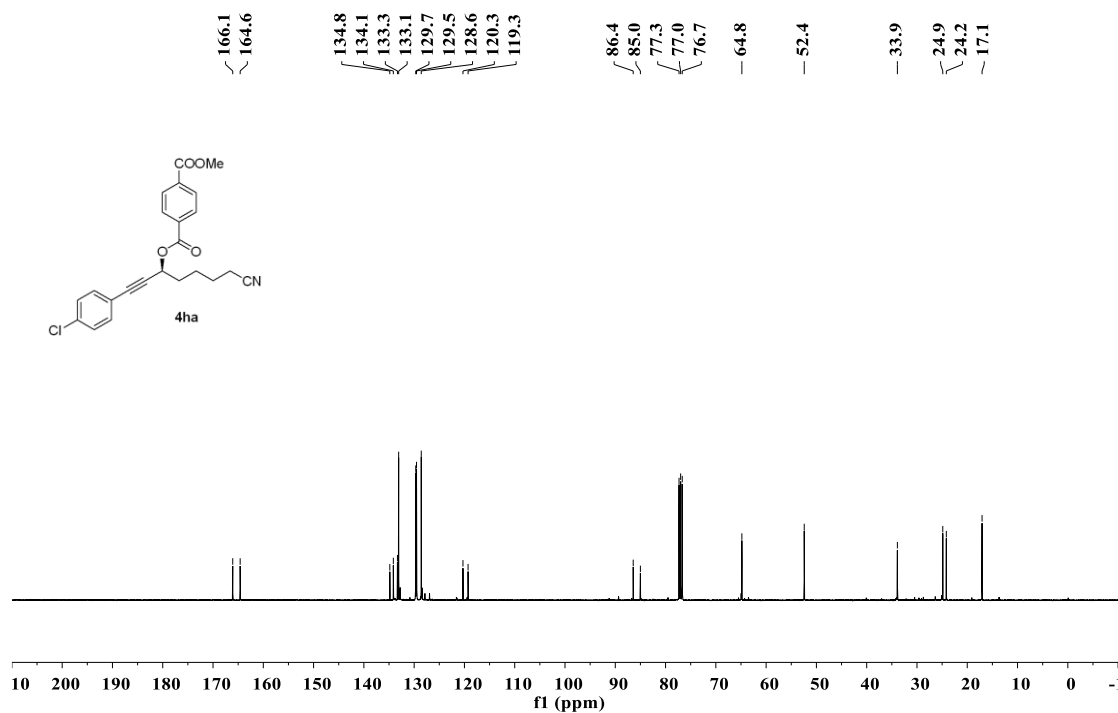

<sup>1</sup>H NMR (400 MHz, CDCl<sub>3</sub>), <sup>13</sup>C NMR (100 MHz, CDCl<sub>3</sub>) and <sup>19</sup>F (376 MHz) spectra of product 4ia

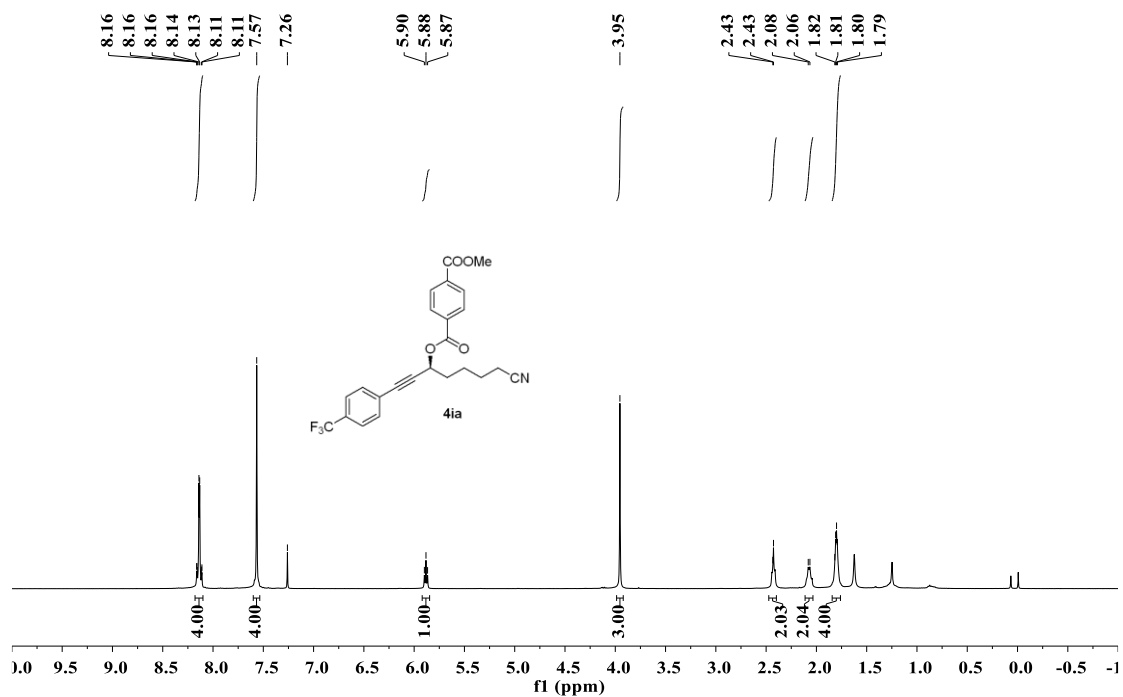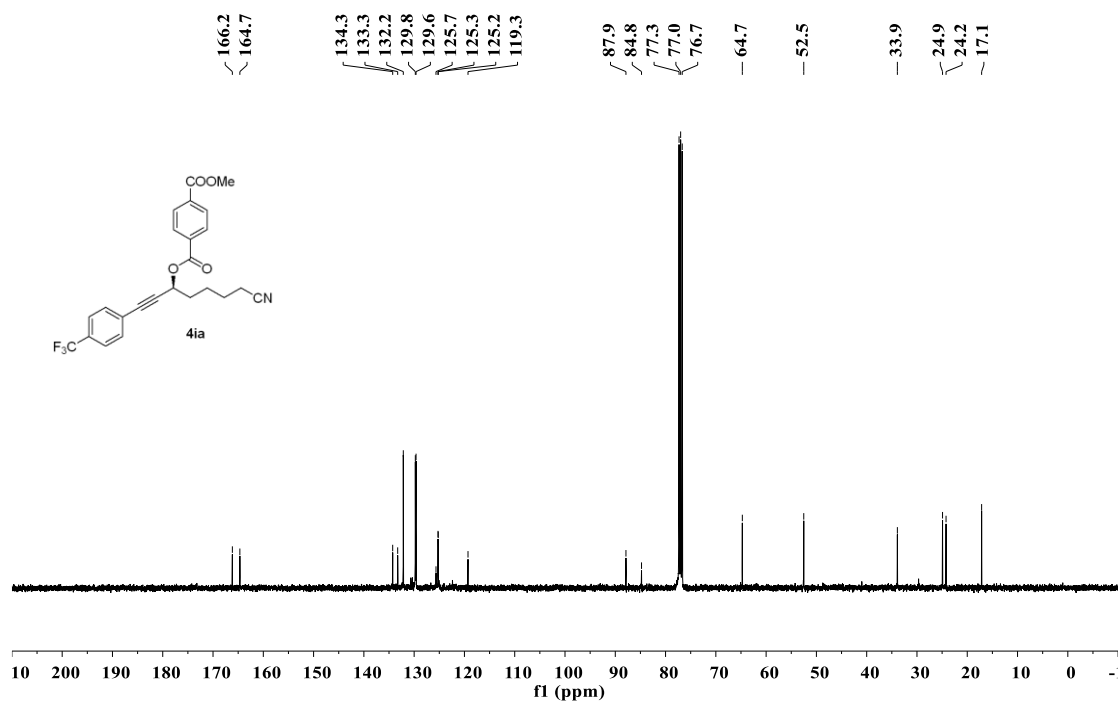

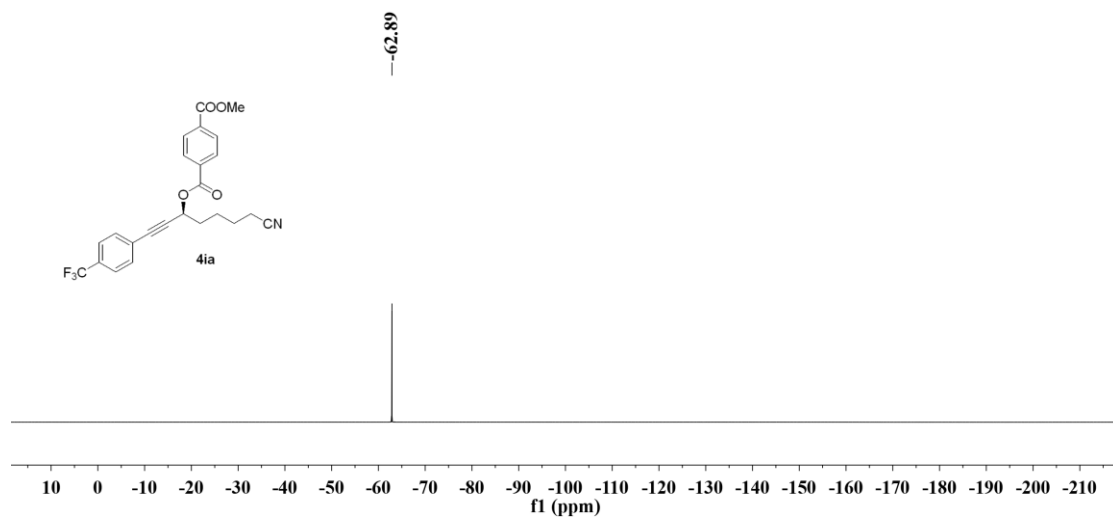



<sup>1</sup>H NMR (400 MHz, CDCl<sub>3</sub>), <sup>13</sup>C NMR (100 MHz, CDCl<sub>3</sub>) and <sup>19</sup>F (376 MHz) spectra of product 4ja

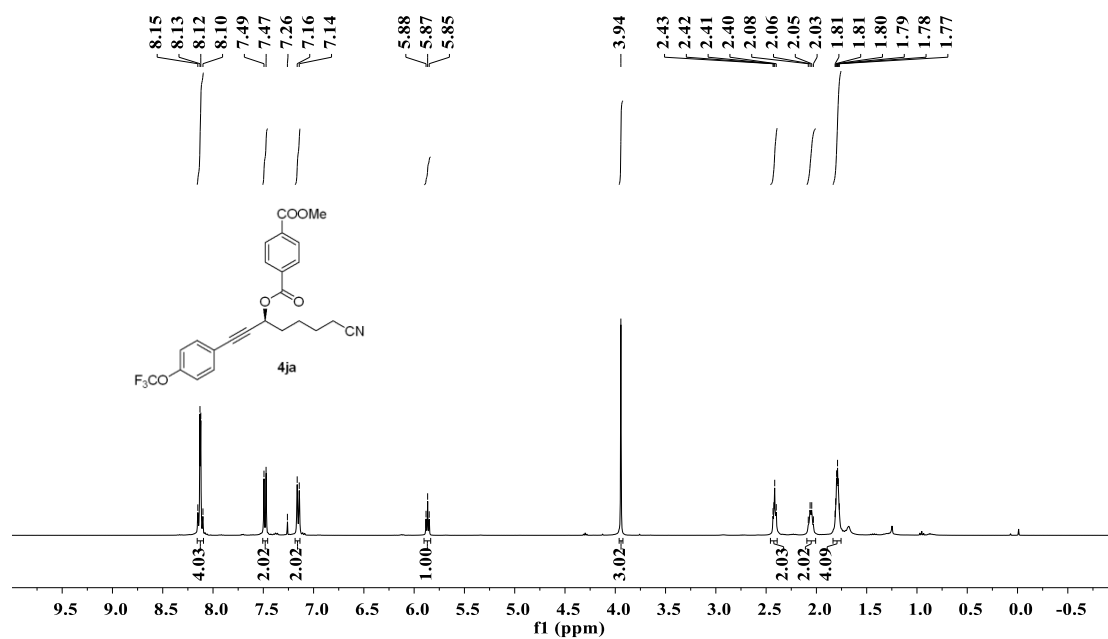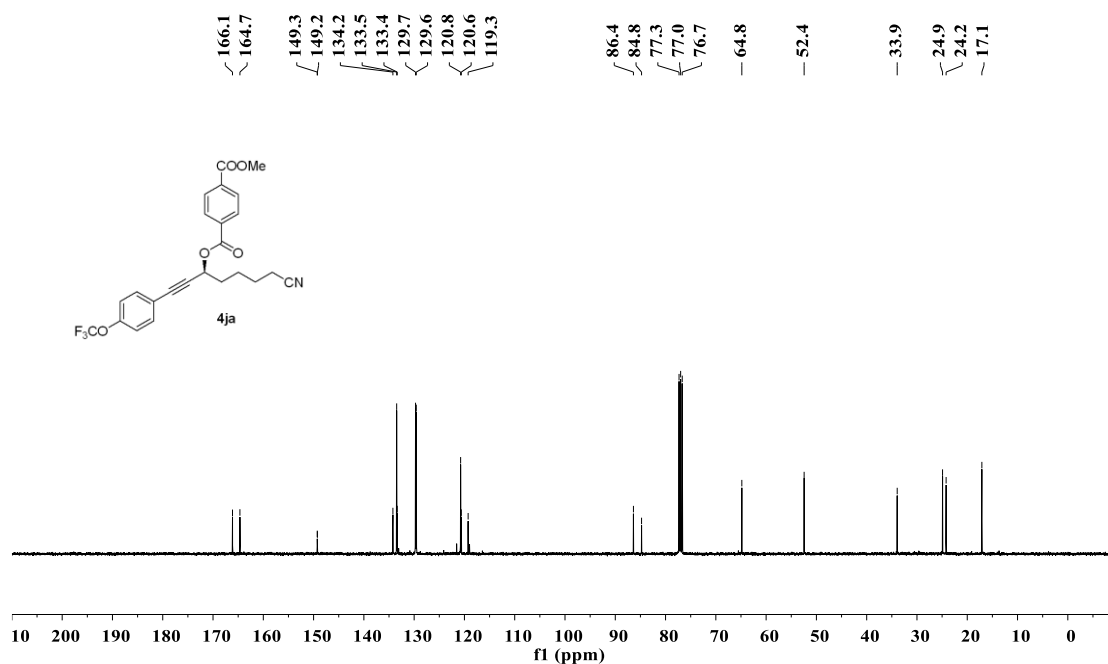

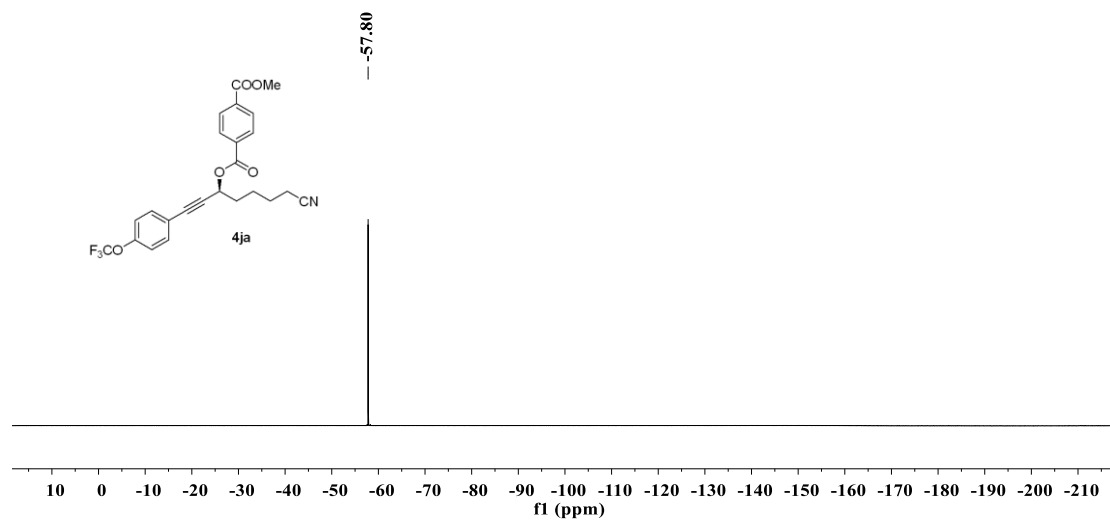

<sup>1</sup>H NMR (400 MHz, CDCl<sub>3</sub>) and <sup>13</sup>C NMR (100 MHz, CDCl<sub>3</sub>) spectra of product 4ka

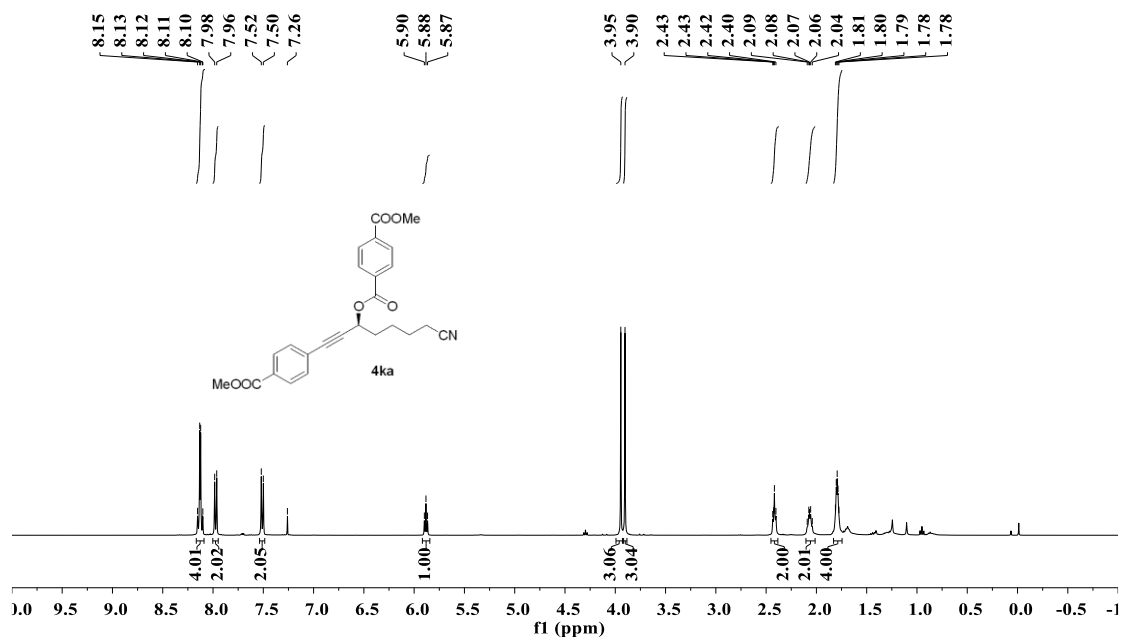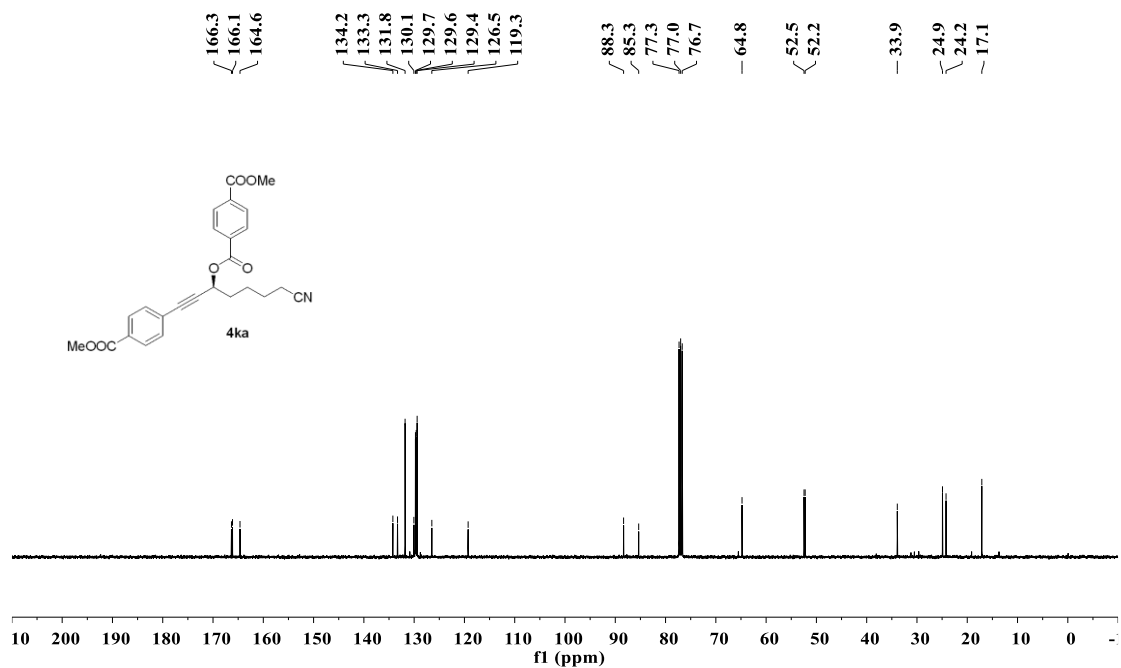

<sup>1</sup>H NMR (400 MHz, CDCl<sub>3</sub>) and <sup>13</sup>C NMR (100 MHz, CDCl<sub>3</sub>) spectra of product 4a

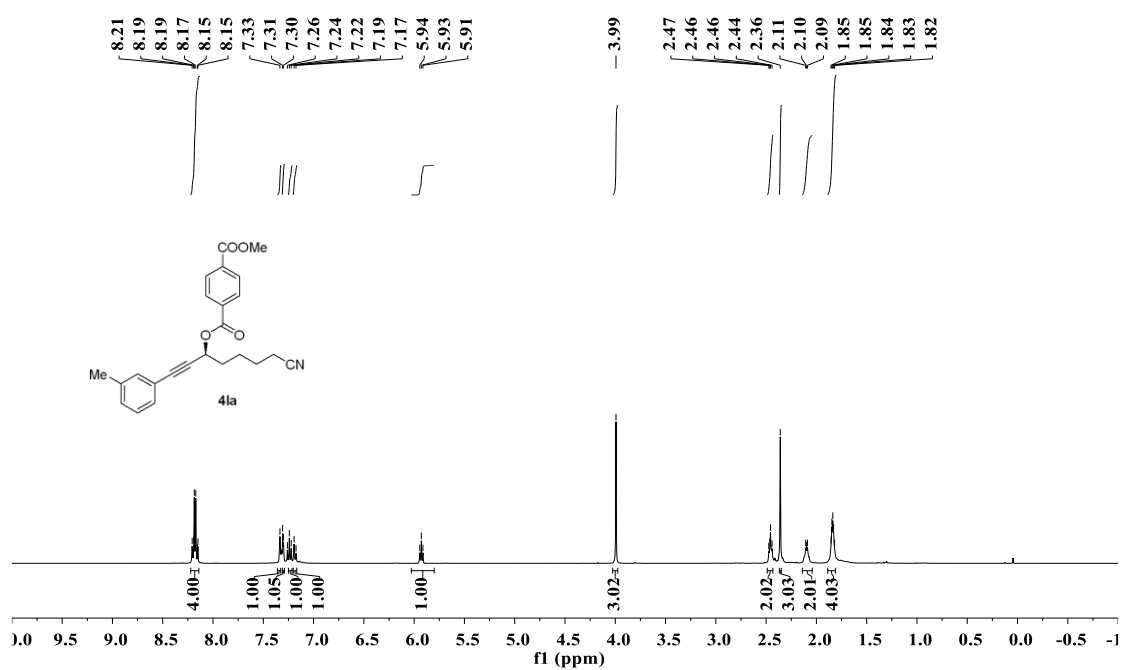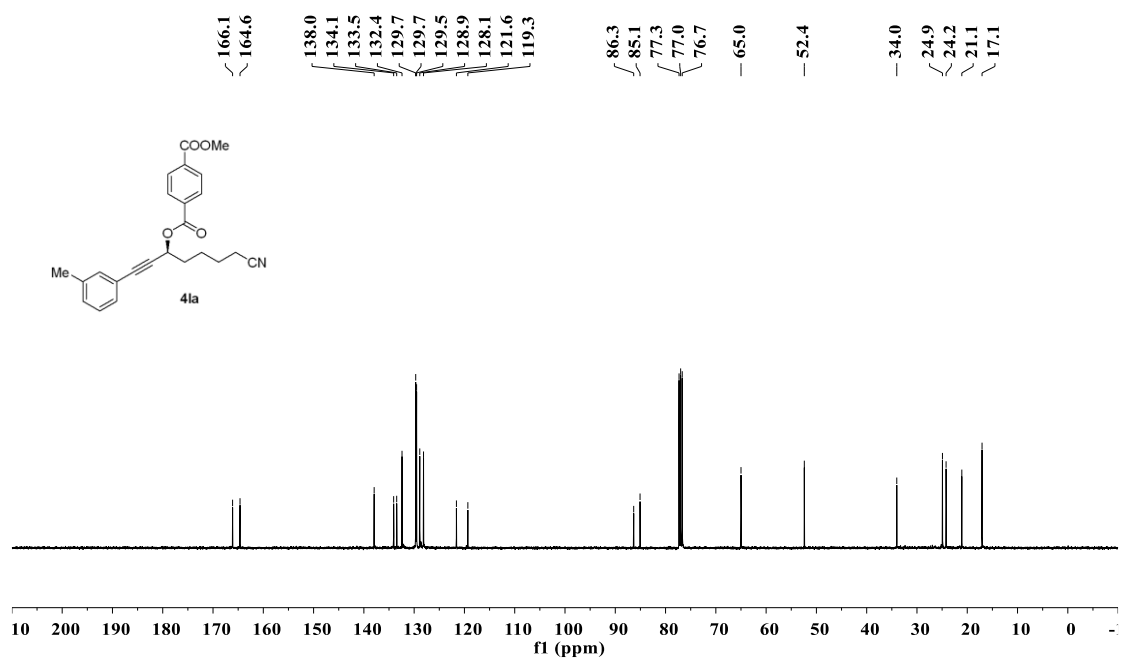

<sup>1</sup>H NMR (400 MHz, CDCl<sub>3</sub>) and <sup>13</sup>C NMR (100 MHz, CDCl<sub>3</sub>) spectra of product 4ma

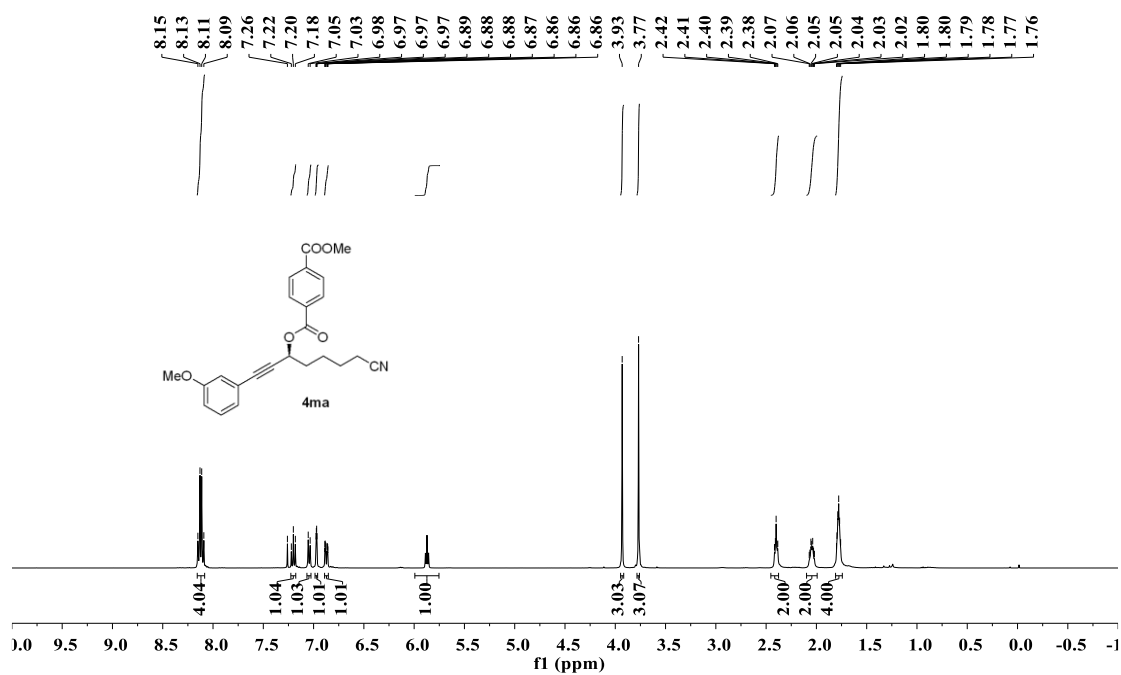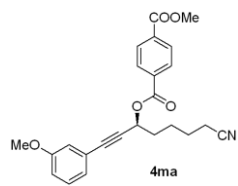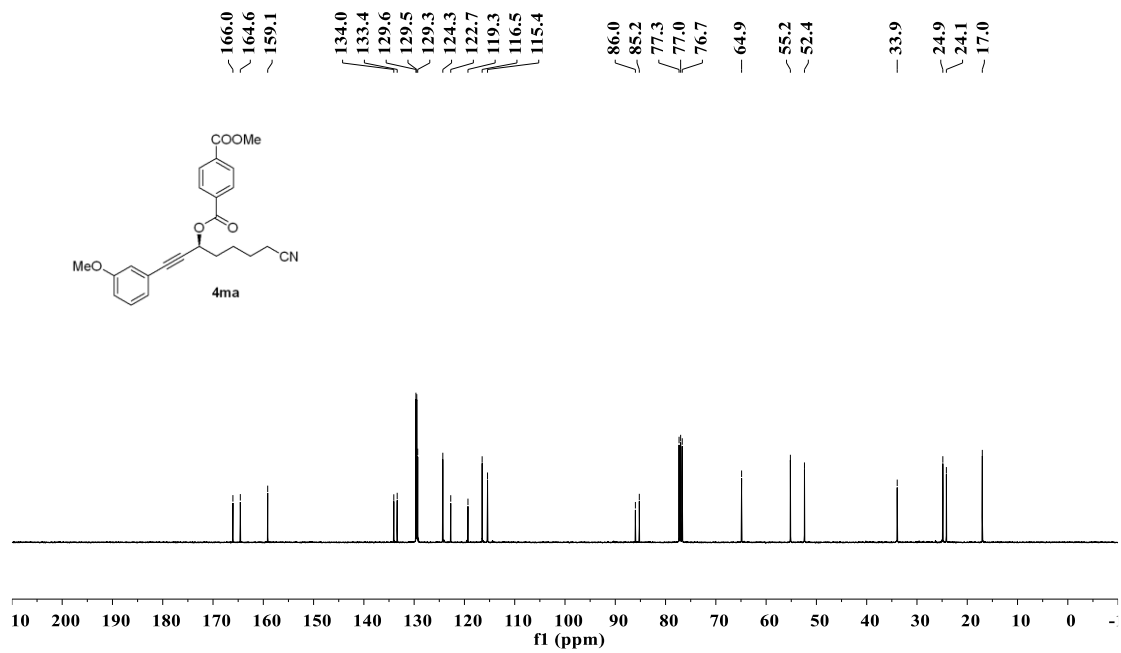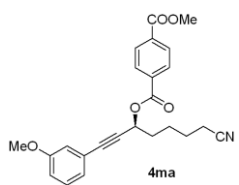

<sup>1</sup>H NMR (400 MHz, CDCl<sub>3</sub>), <sup>13</sup>C NMR (100 MHz, CDCl<sub>3</sub>) and <sup>19</sup>F NMR (376 MHz, CDCl<sub>3</sub>) of product 4na

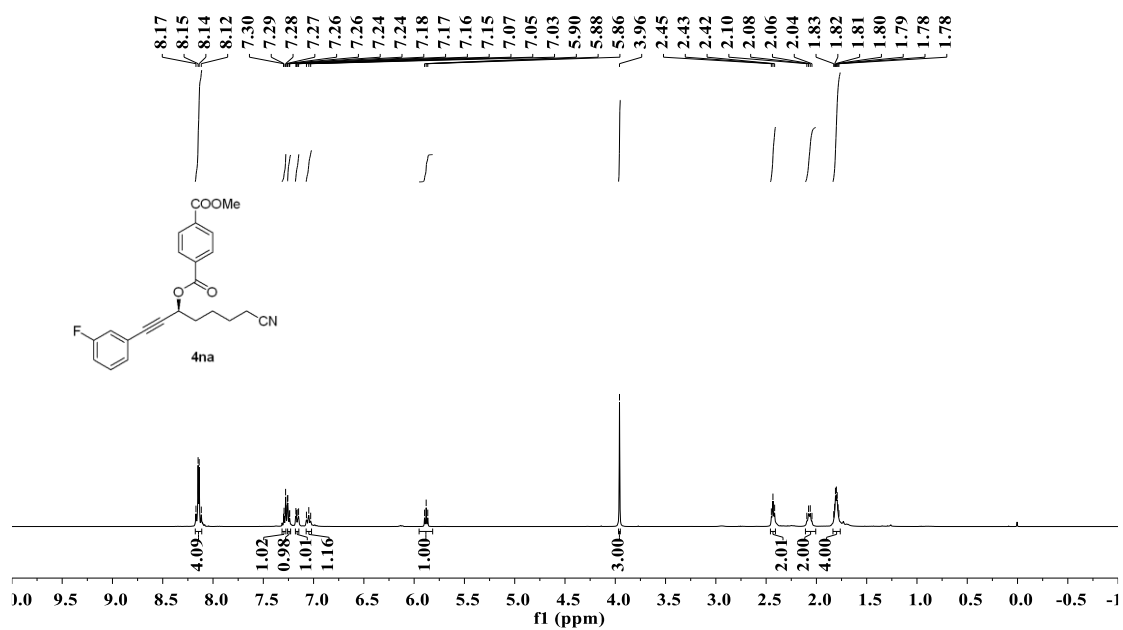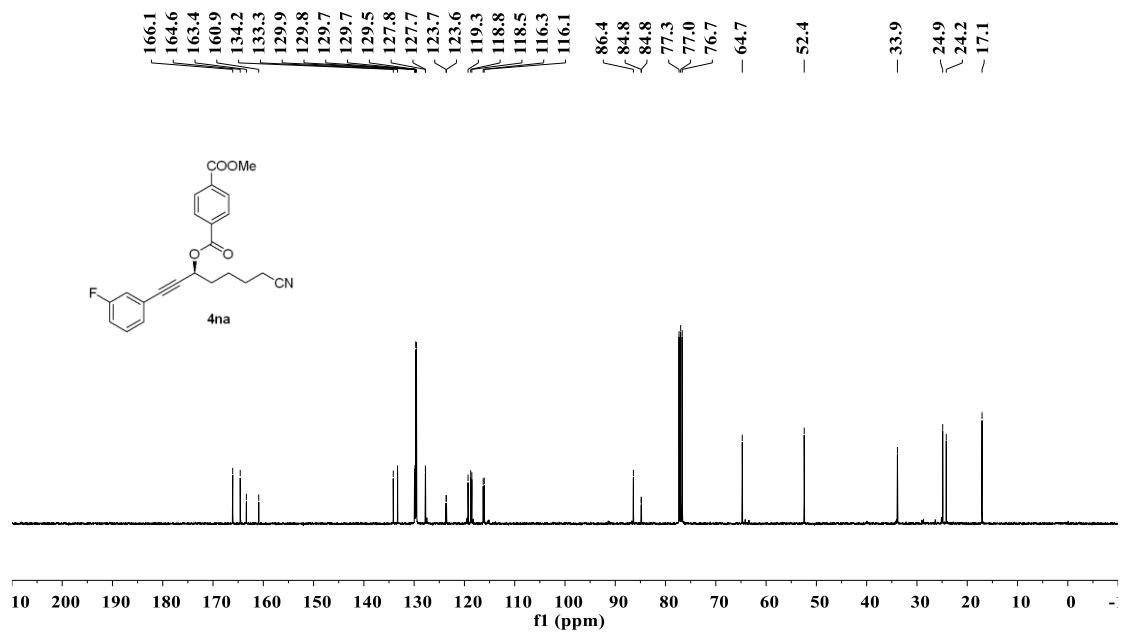

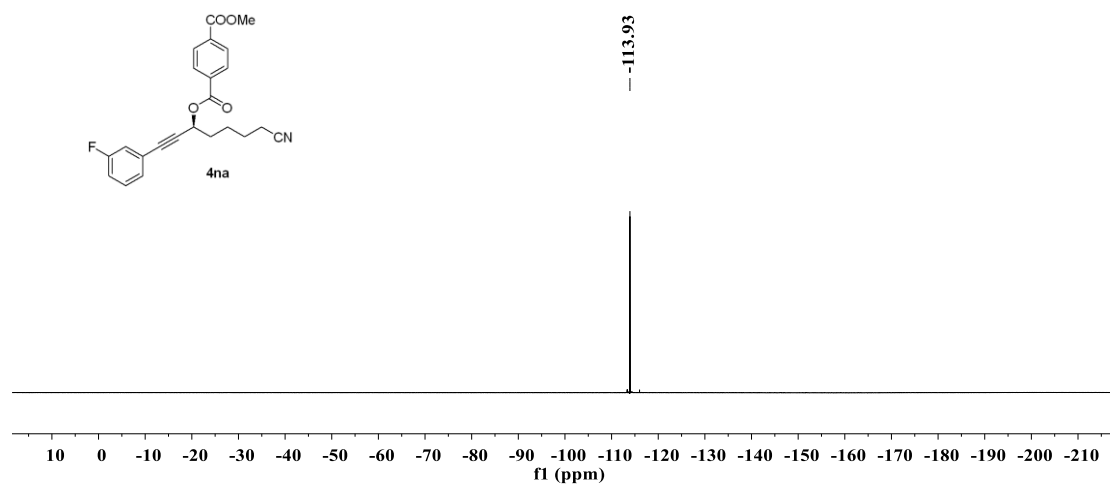

<sup>1</sup>H NMR (400 MHz, CDCl<sub>3</sub>) and <sup>13</sup>C NMR (100 MHz, CDCl<sub>3</sub>) spectra of product 4oa

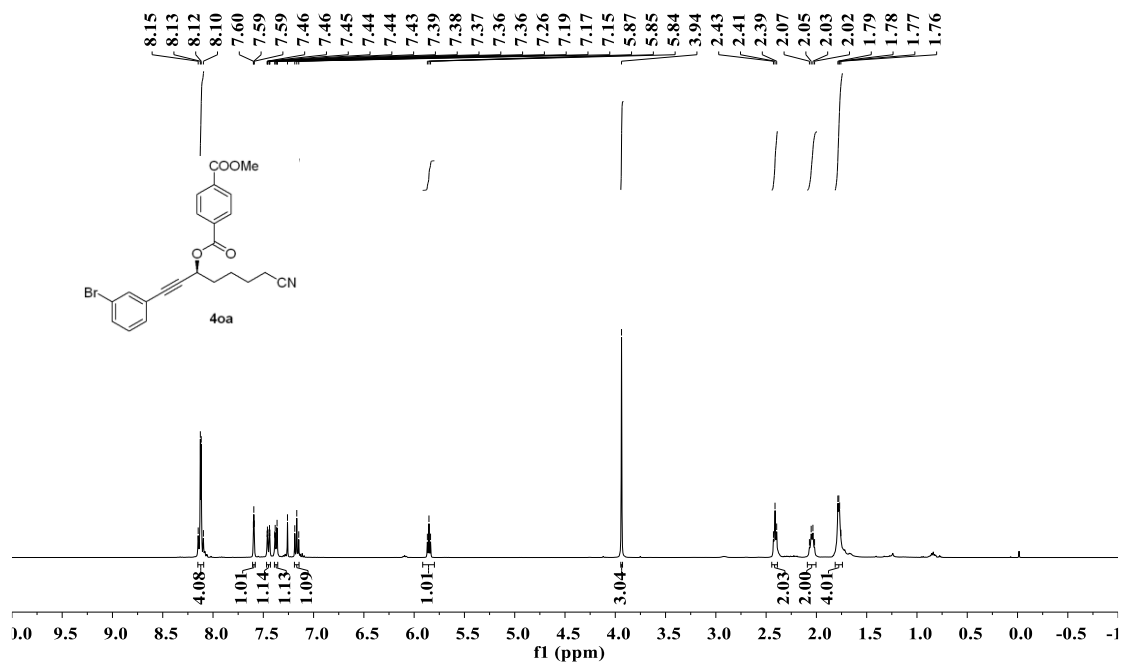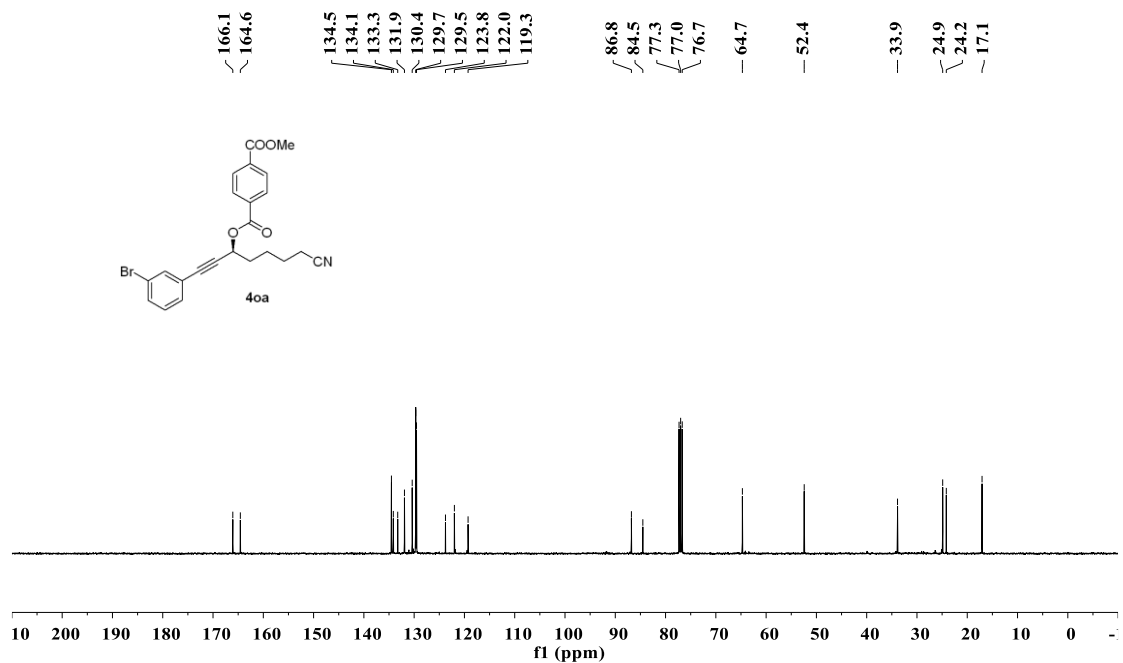



<sup>1</sup>H NMR (400 MHz, CDCl<sub>3</sub>) and <sup>13</sup>C NMR (100 MHz, CDCl<sub>3</sub>) spectra of product 4pa

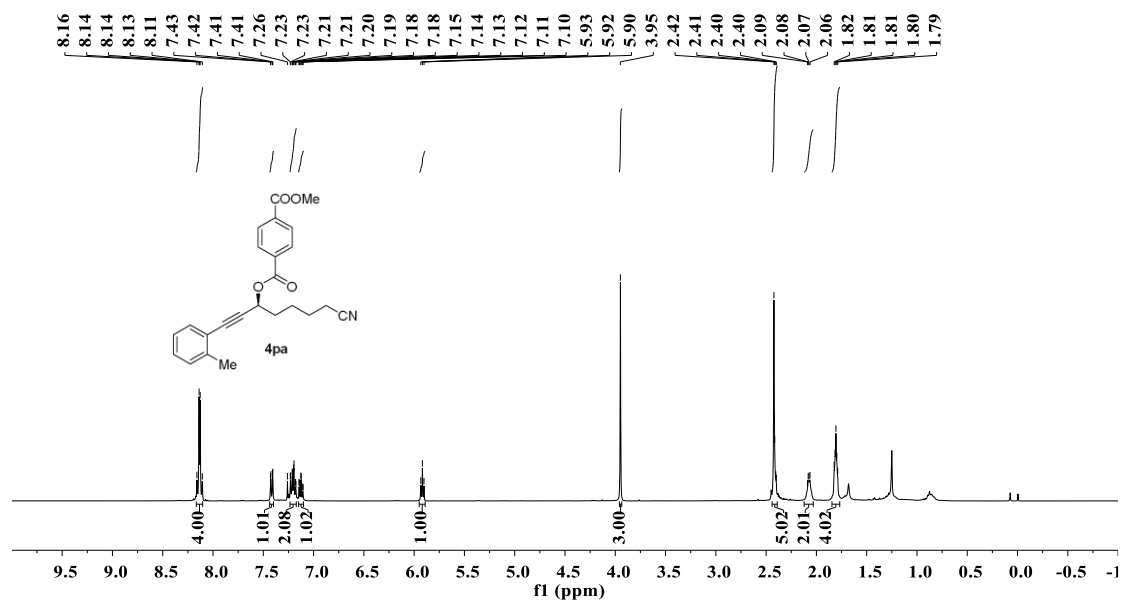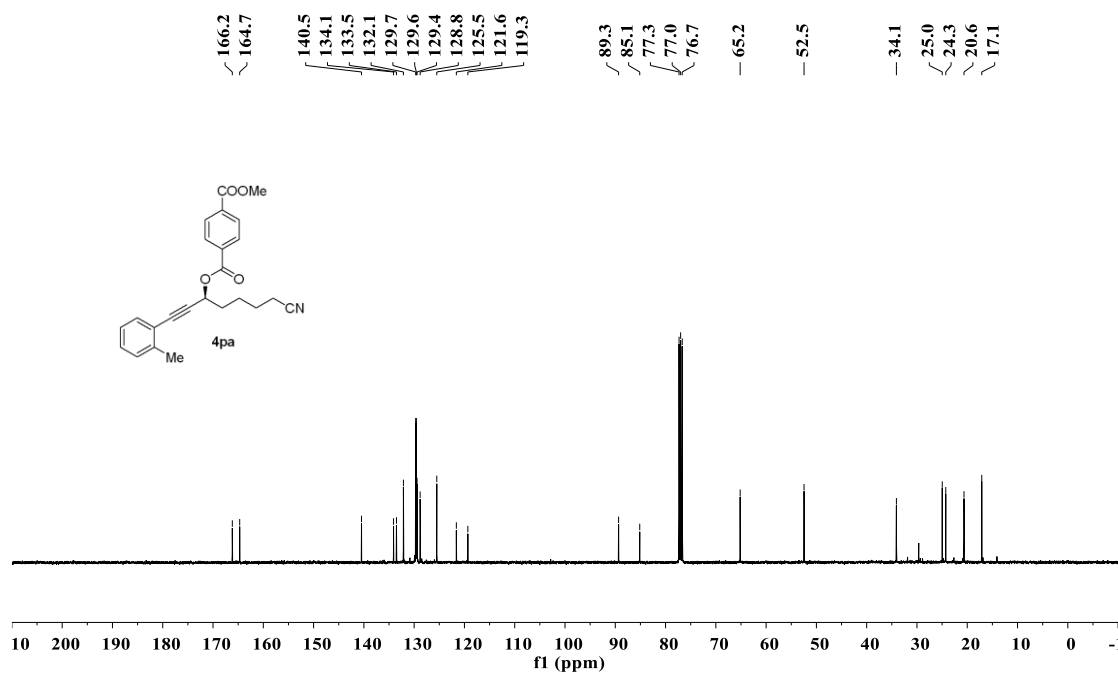

<sup>1</sup>H NMR (400 MHz, CDCl<sub>3</sub>) and <sup>13</sup>C NMR (100 MHz, CDCl<sub>3</sub>) spectra of product 4qa

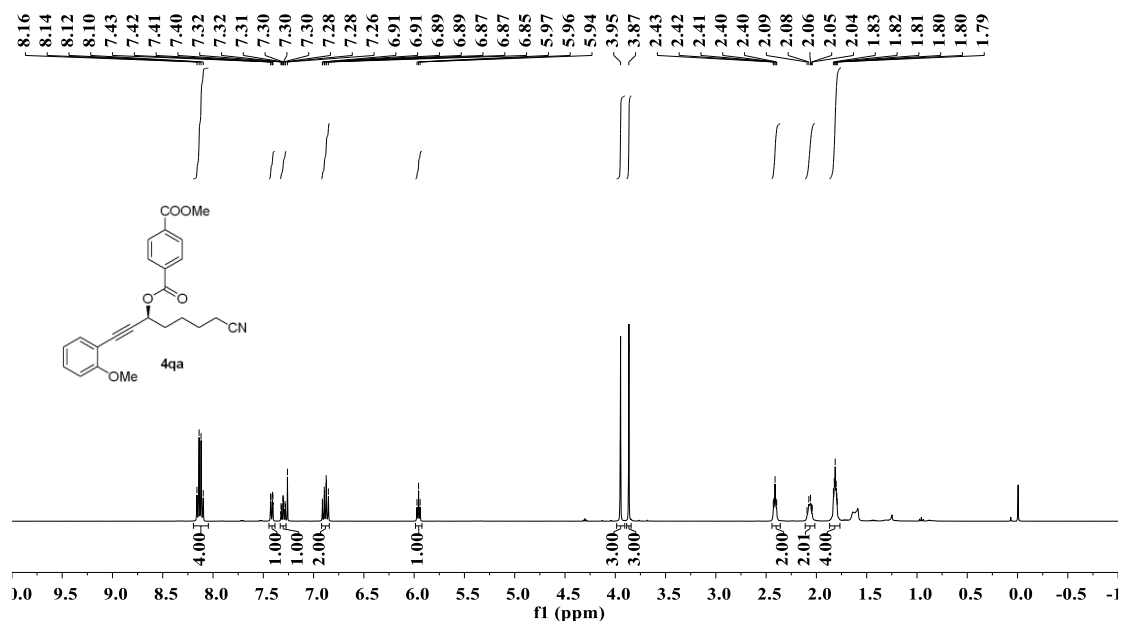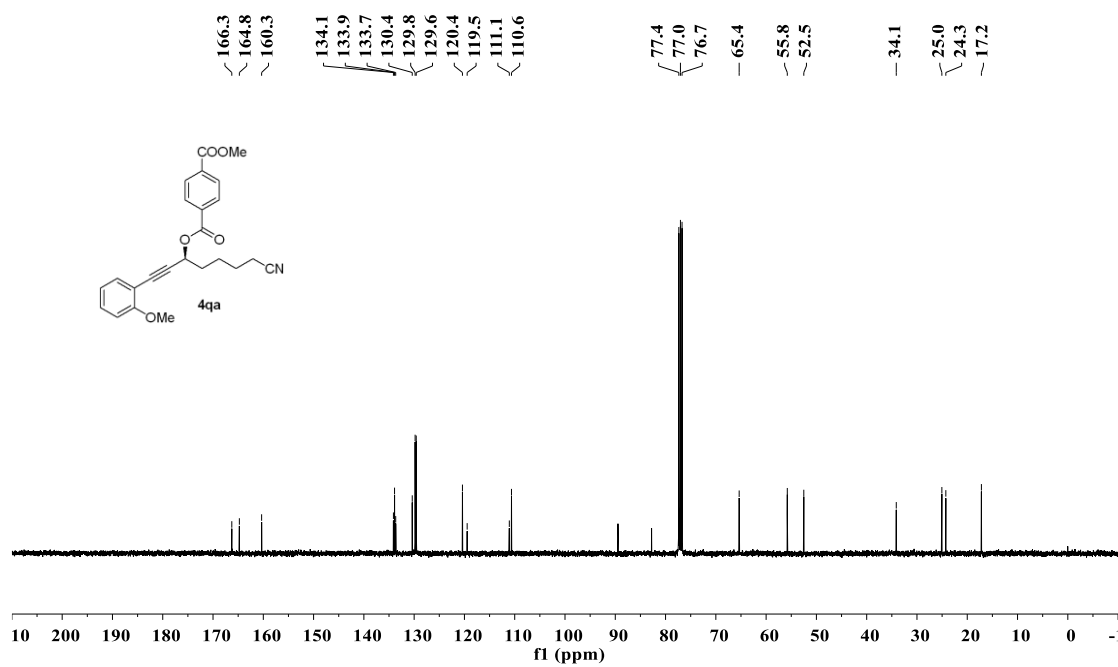

$^1\text{H}$  NMR (400 MHz,  $\text{CDCl}_3$ ) and  $^{13}\text{C}$  NMR (100 MHz,  $\text{CDCl}_3$ ) spectra of product 4ra

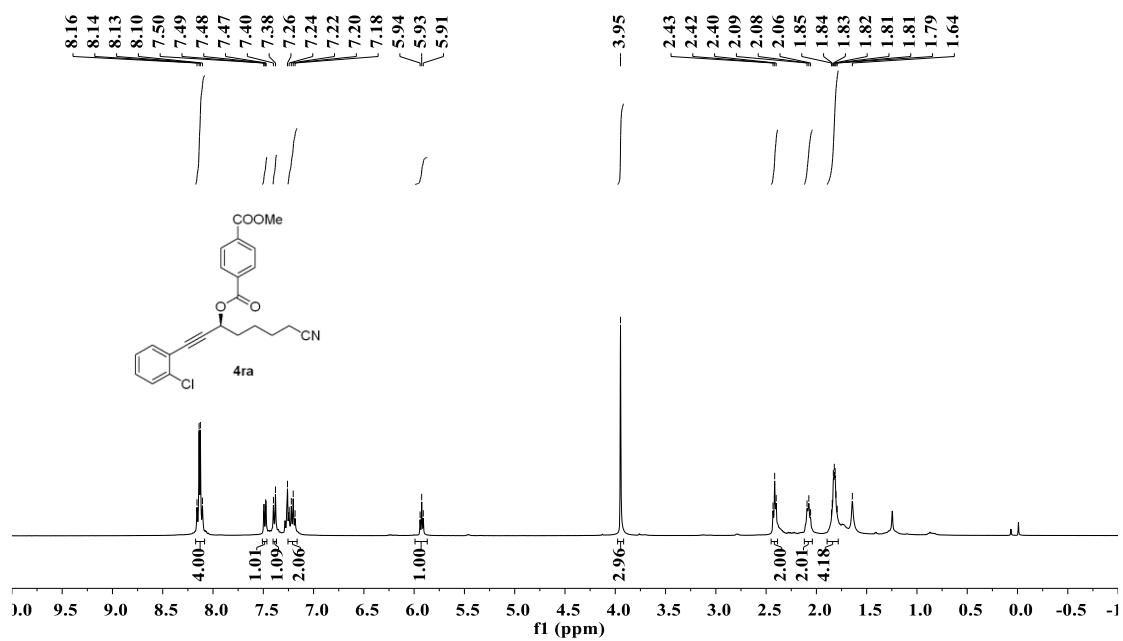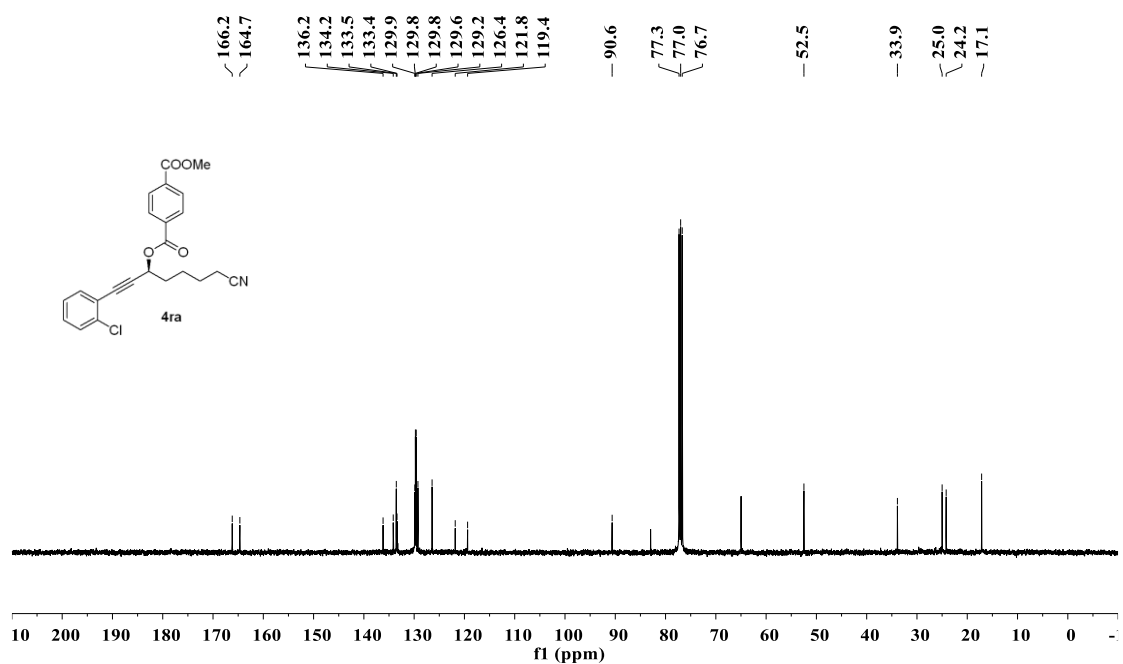

$^1\text{H}$  NMR (400 MHz,  $\text{CDCl}_3$ ) and  $^{13}\text{C}$  NMR (100 MHz,  $\text{CDCl}_3$ ) spectra of product 4sa

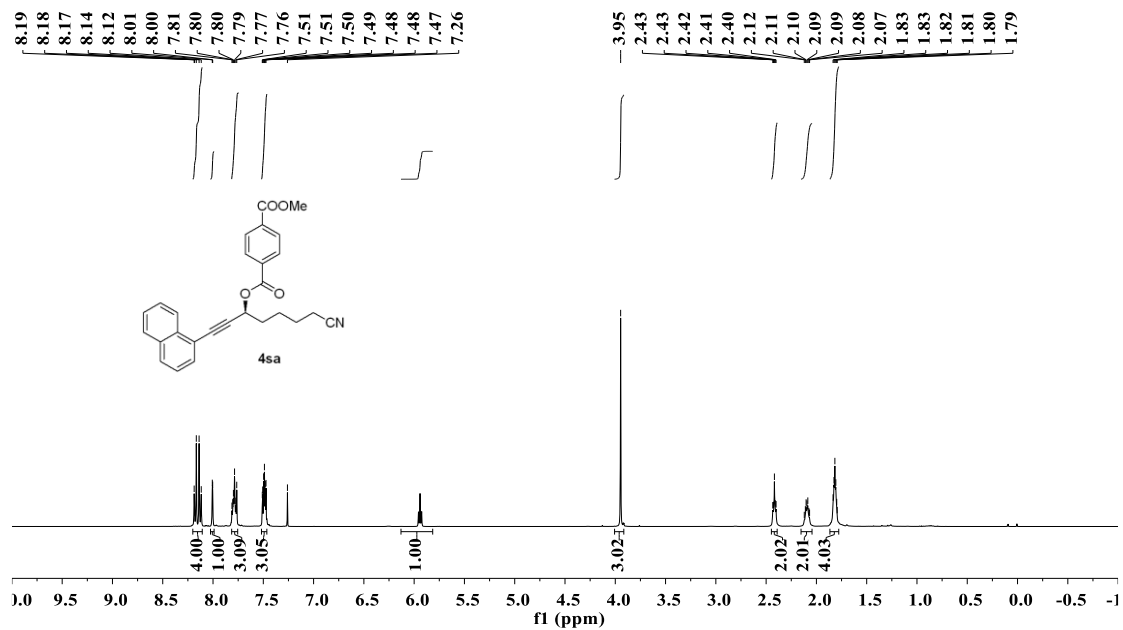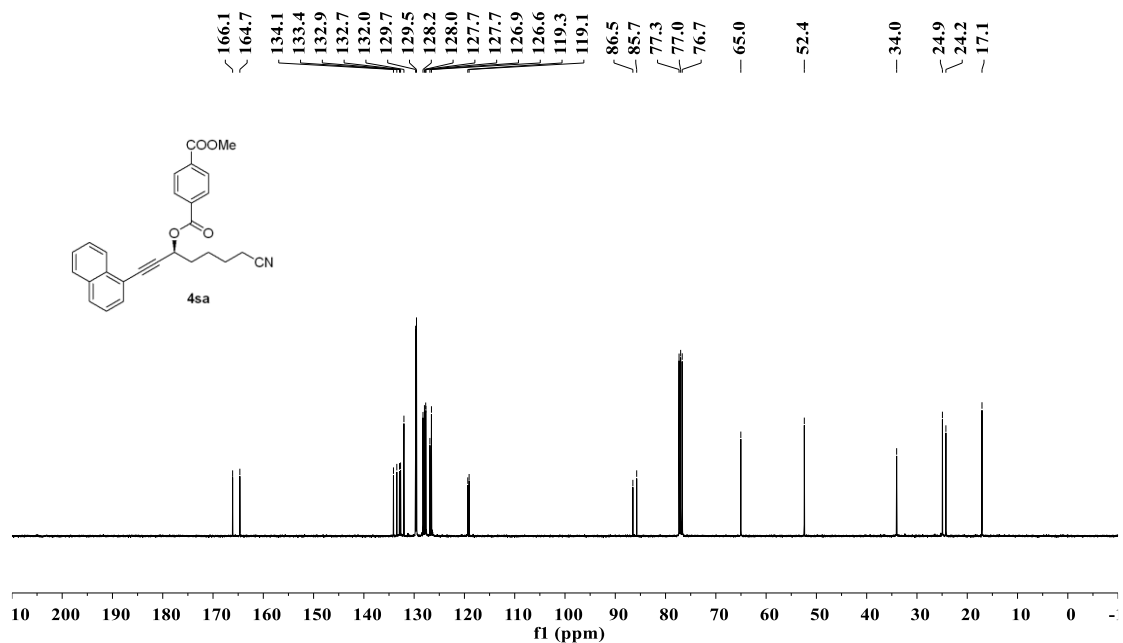

<sup>1</sup>H NMR (400 MHz, CDCl<sub>3</sub>) and <sup>13</sup>C NMR (100 MHz, CDCl<sub>3</sub>) spectra of product 4ta

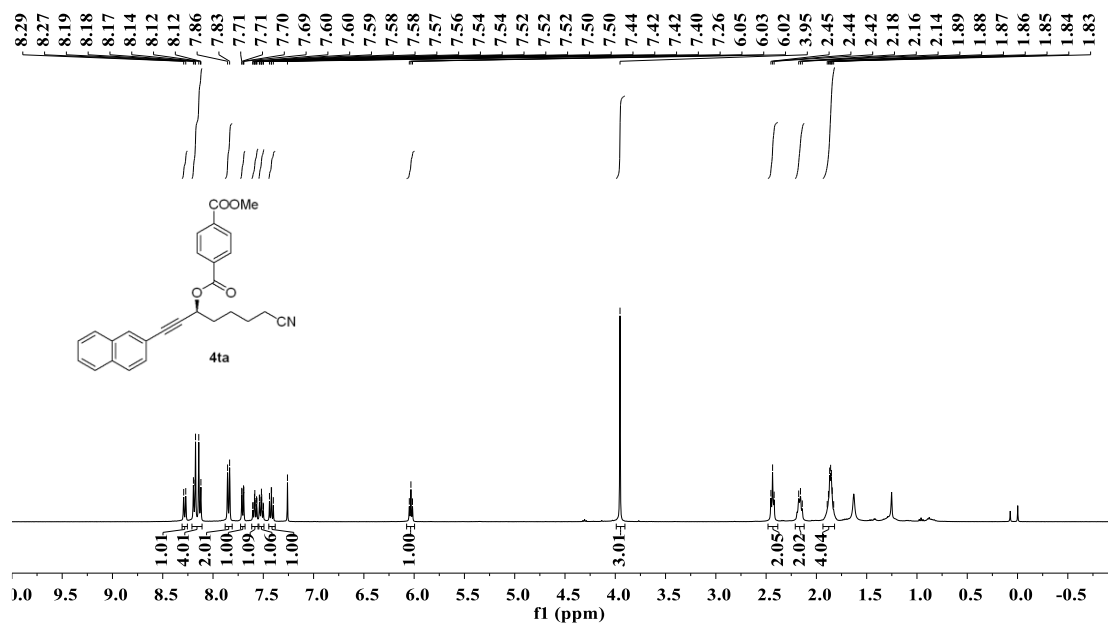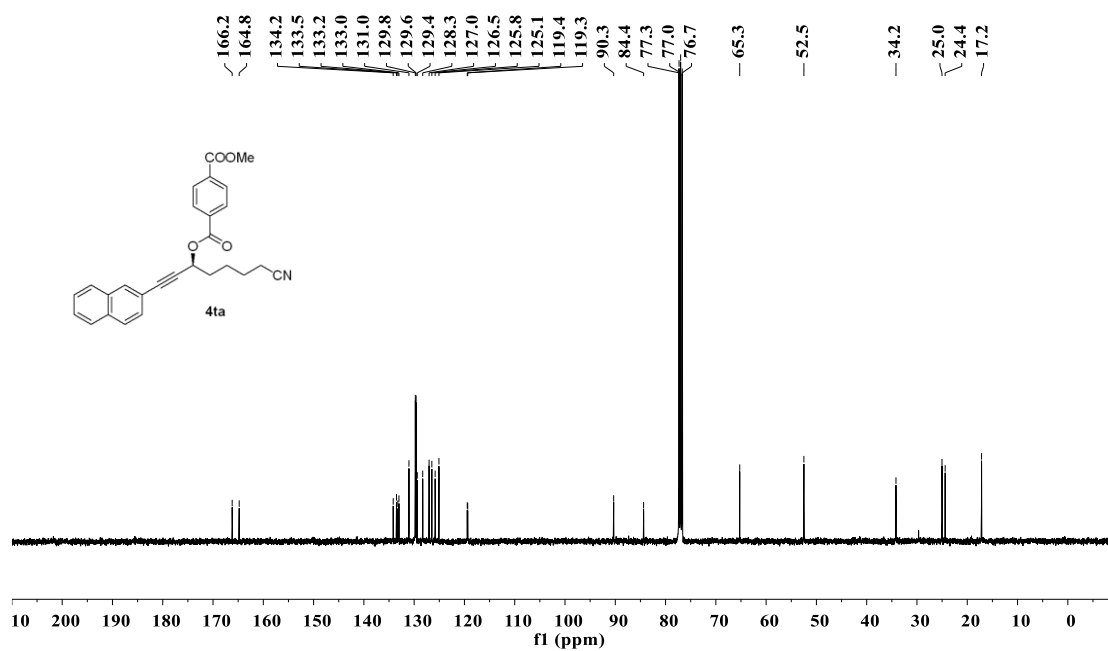

$^1\text{H}$  NMR (400 MHz,  $\text{CDCl}_3$ ) and  $^{13}\text{C}$  NMR (100 MHz,  $\text{CDCl}_3$ ) spectra of product 4ua

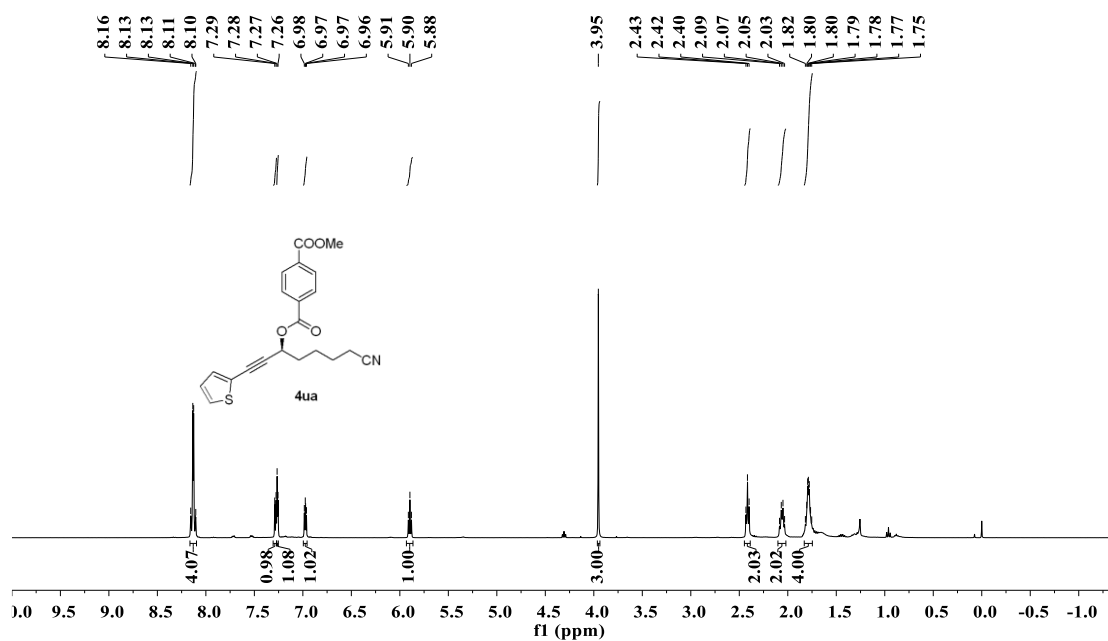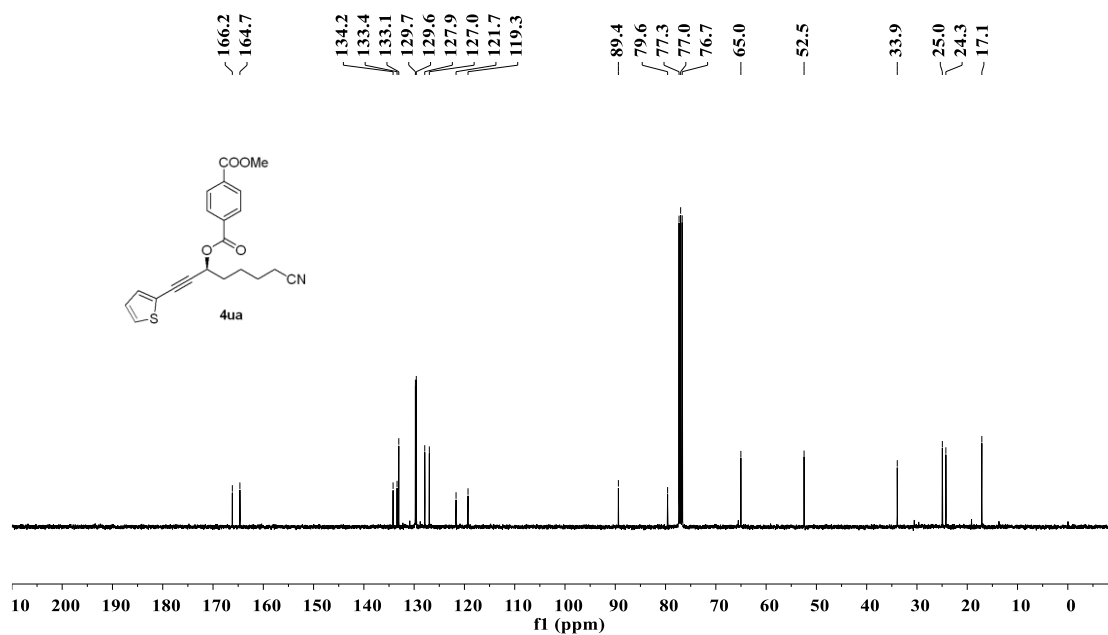

<sup>1</sup>H NMR (400 MHz, CDCl<sub>3</sub>) and <sup>13</sup>C NMR (100 MHz, CDCl<sub>3</sub>) spectra of product 4va

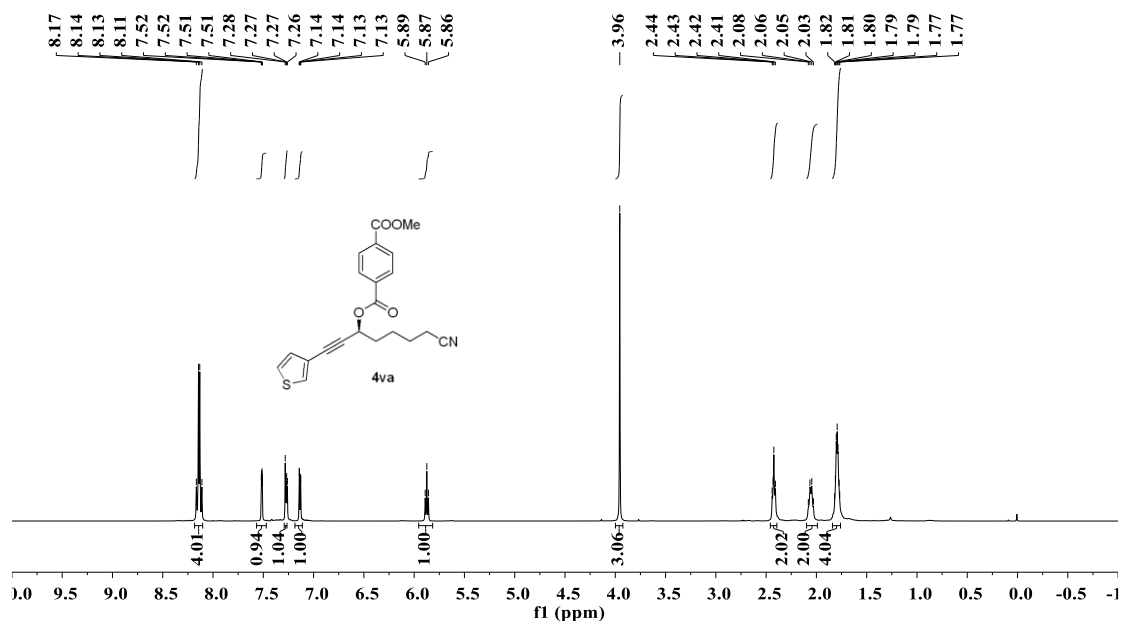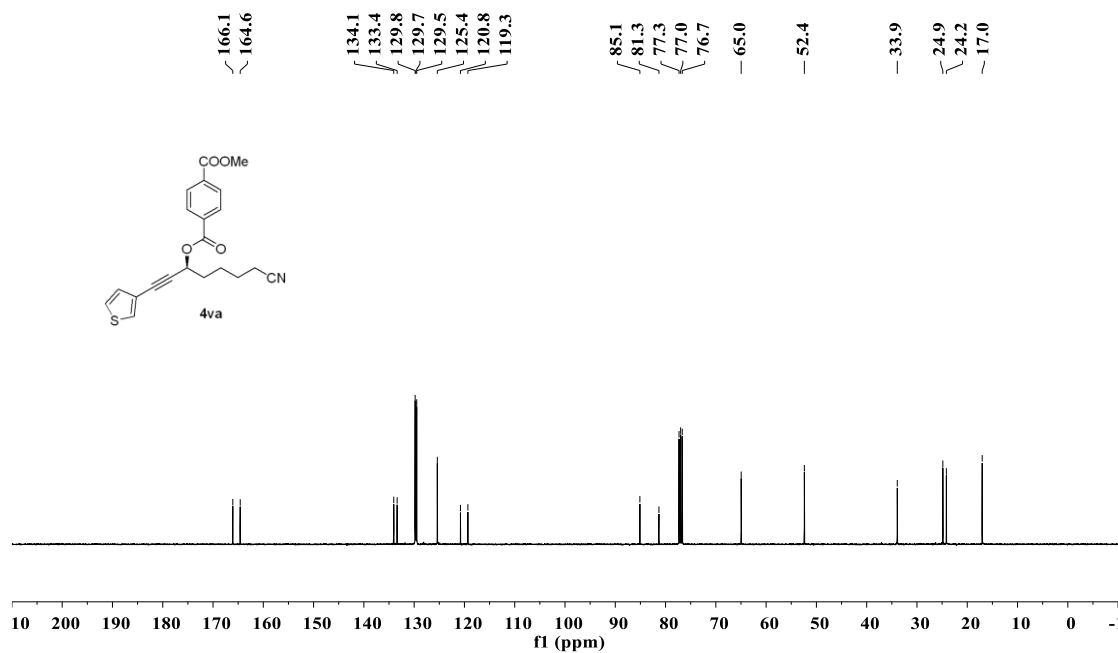

<sup>1</sup>H NMR (400 MHz, CDCl<sub>3</sub>) and <sup>13</sup>C NMR (100 MHz, CDCl<sub>3</sub>) spectra of product 4wa

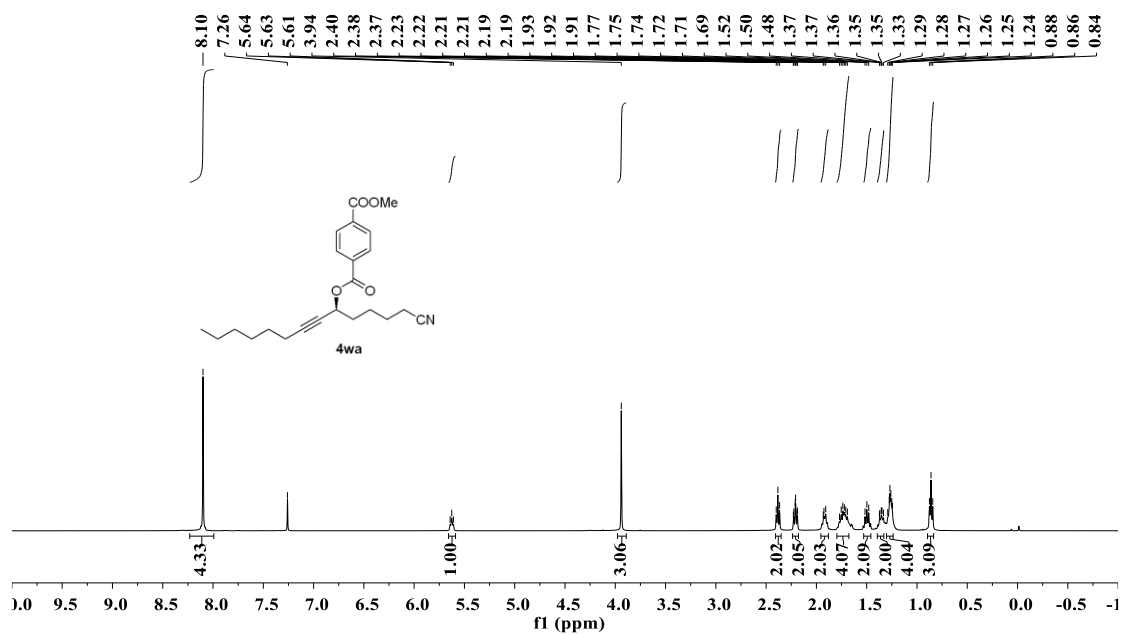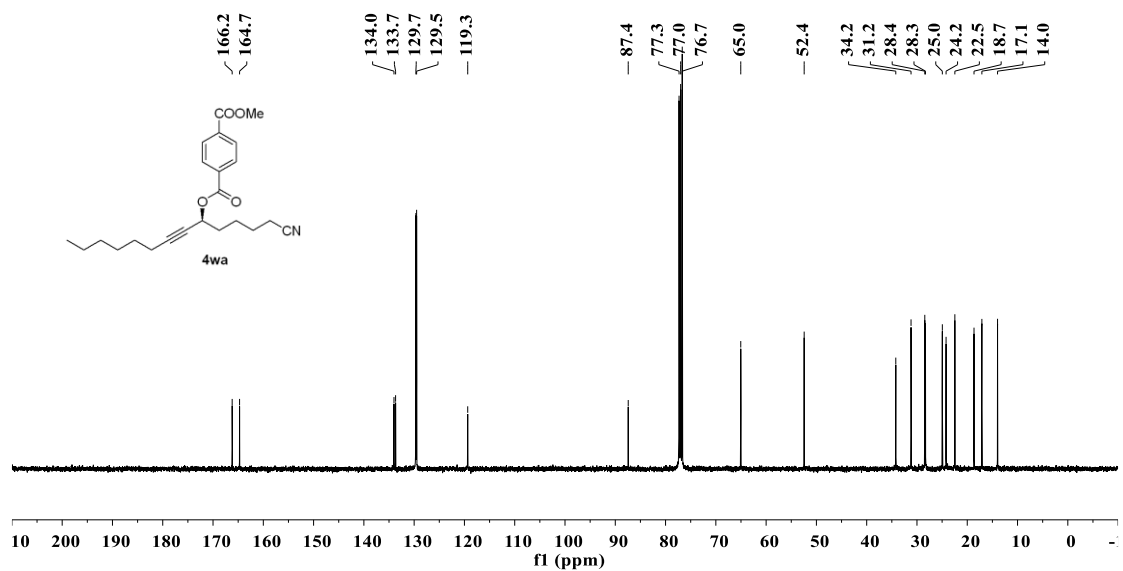



<sup>1</sup>H NMR (400 MHz, CDCl<sub>3</sub>) and <sup>13</sup>C NMR (100 MHz, CDCl<sub>3</sub>) spectra of product 4xa

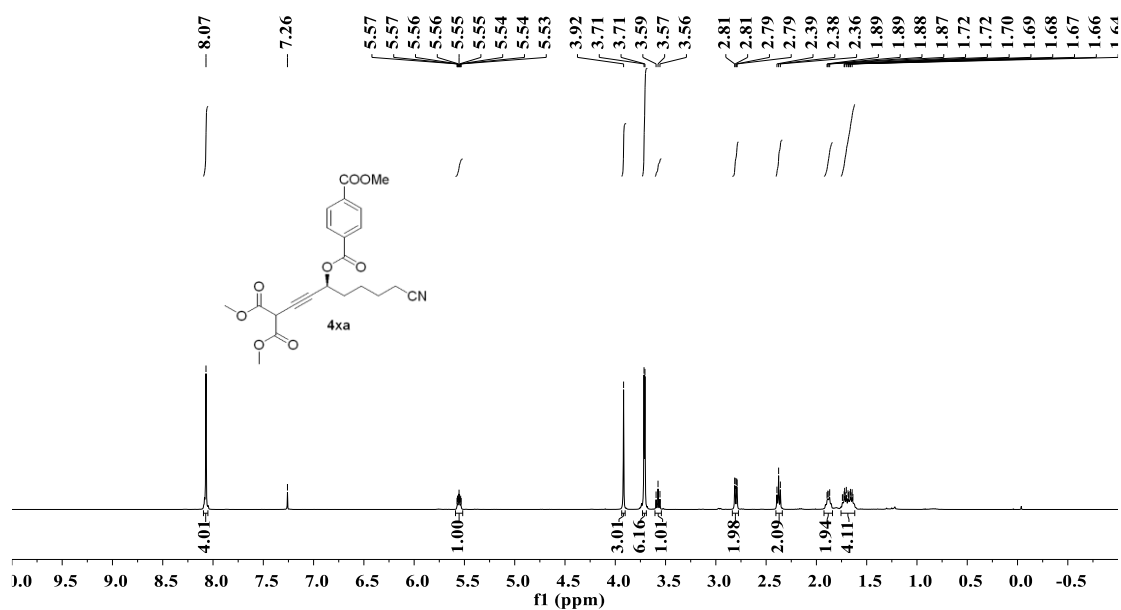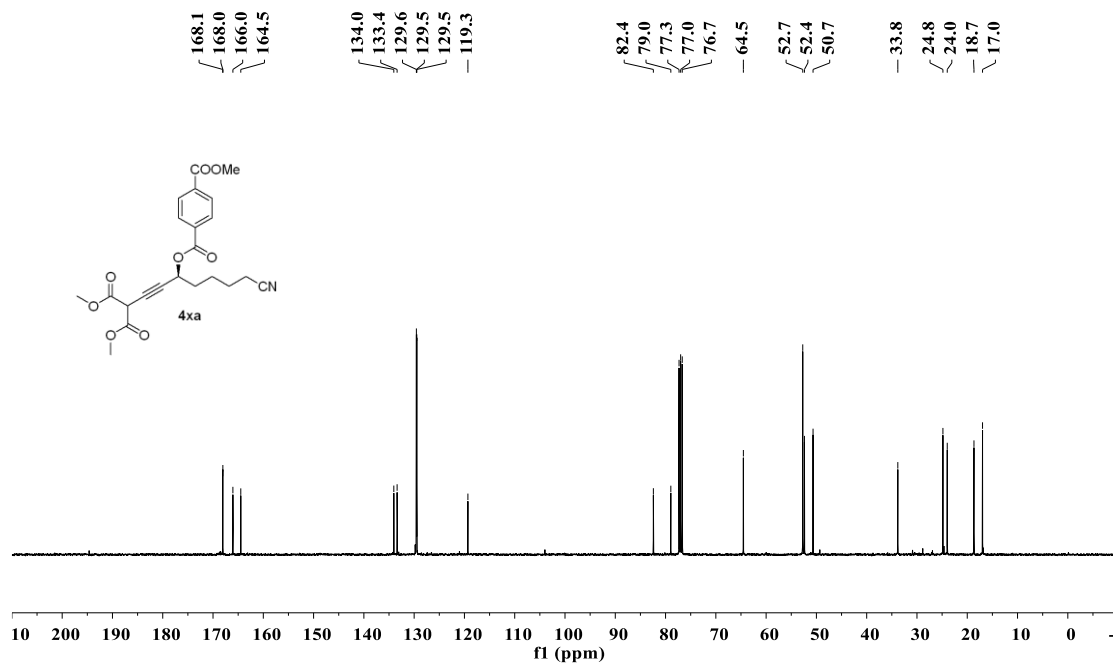

<sup>1</sup>H NMR (400 MHz, CDCl<sub>3</sub>) and <sup>13</sup>C NMR (100 MHz, CDCl<sub>3</sub>) spectra of product 5ba

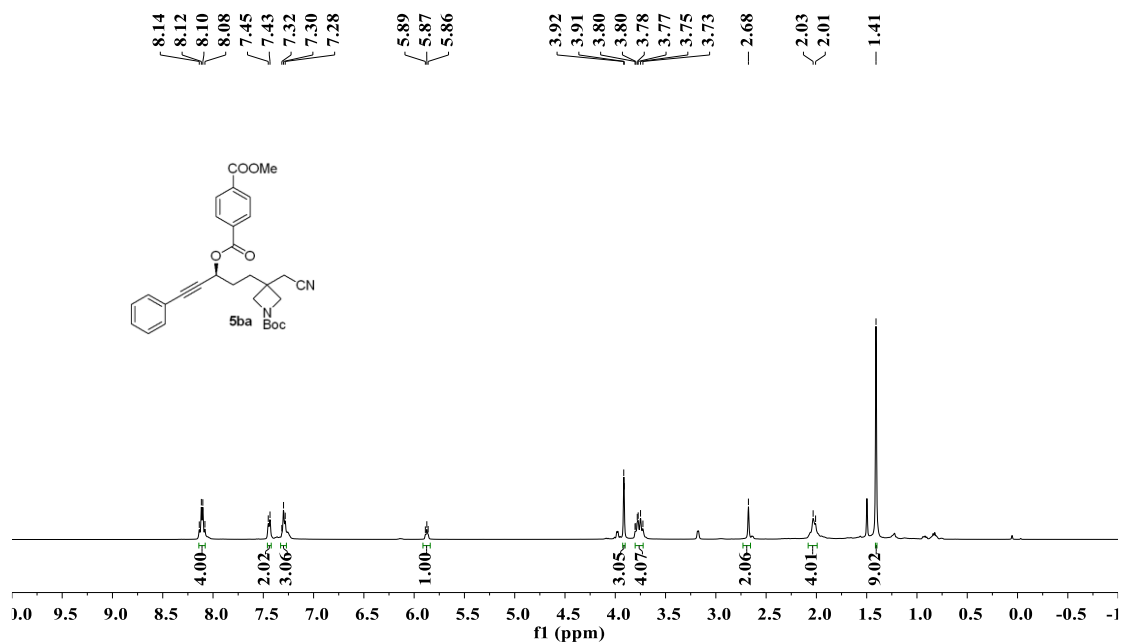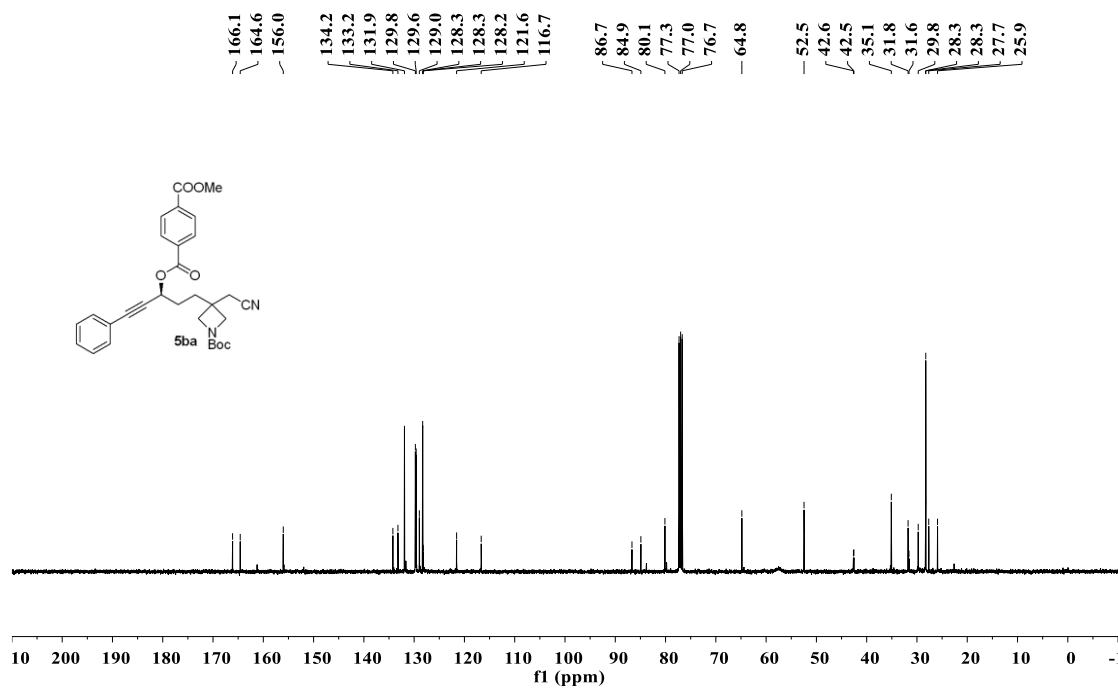

<sup>1</sup>H NMR (400 MHz, CDCl<sub>3</sub>) and <sup>13</sup>C NMR (100 MHz, CDCl<sub>3</sub>) spectra of product 5ca

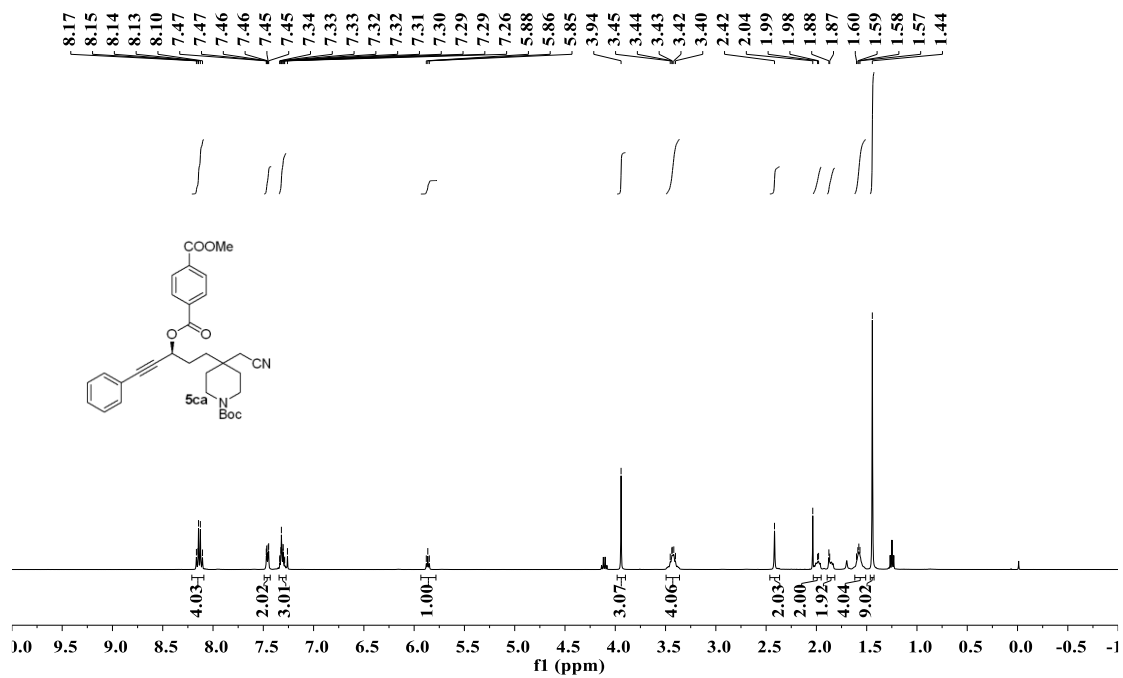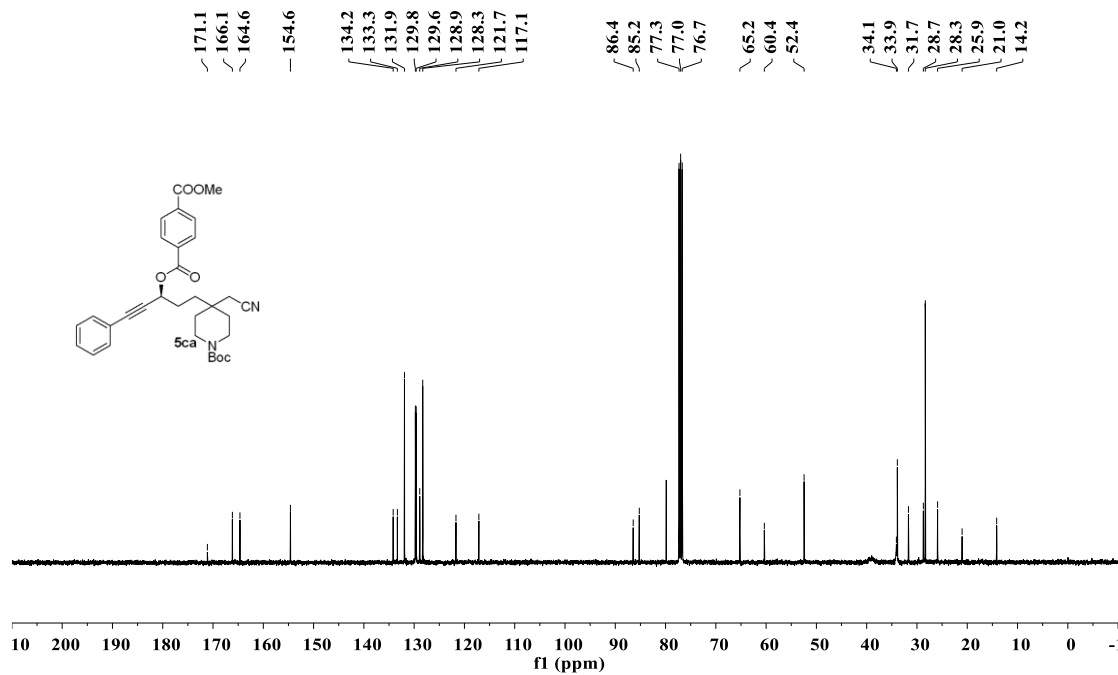

<sup>1</sup>H NMR (400 MHz, CDCl<sub>3</sub>) and <sup>13</sup>C NMR (100 MHz, CDCl<sub>3</sub>) spectra of product 5da

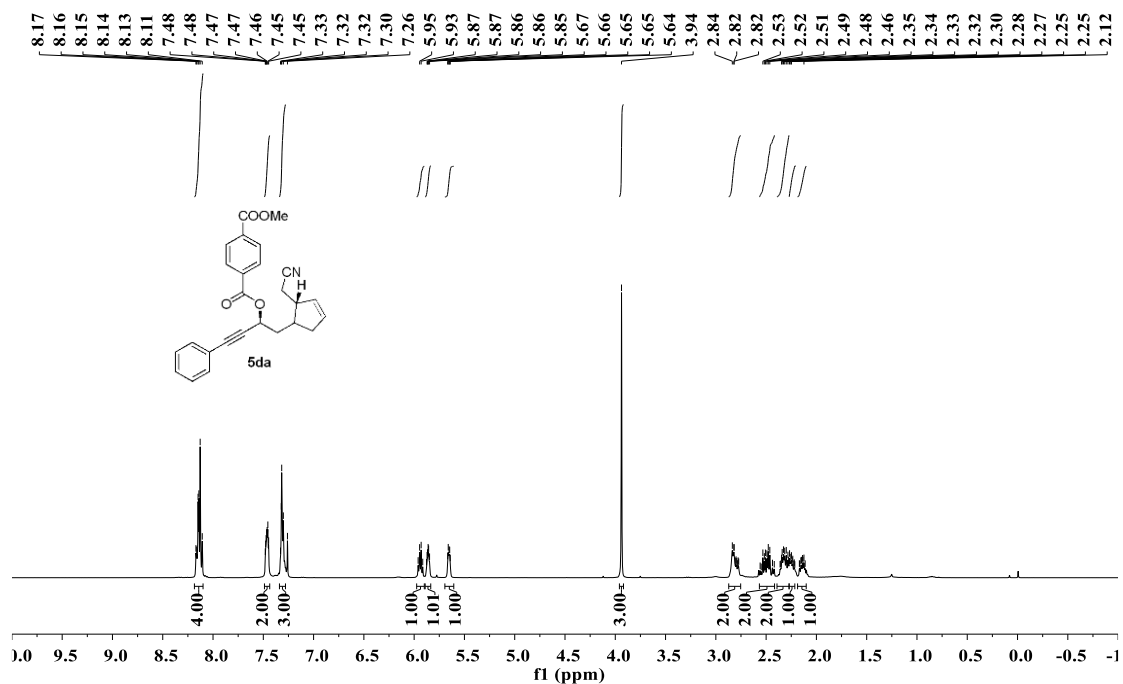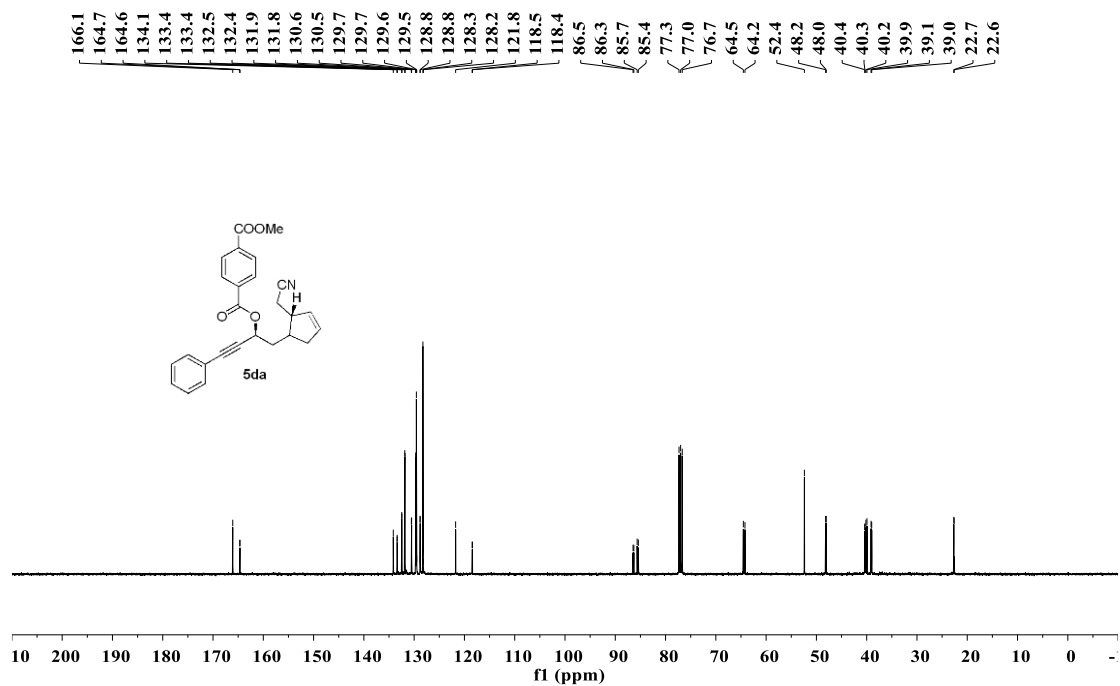

<sup>1</sup>H NMR (400 MHz, CDCl<sub>3</sub>) and <sup>13</sup>C NMR (100 MHz, CDCl<sub>3</sub>) spectra of product 5ea

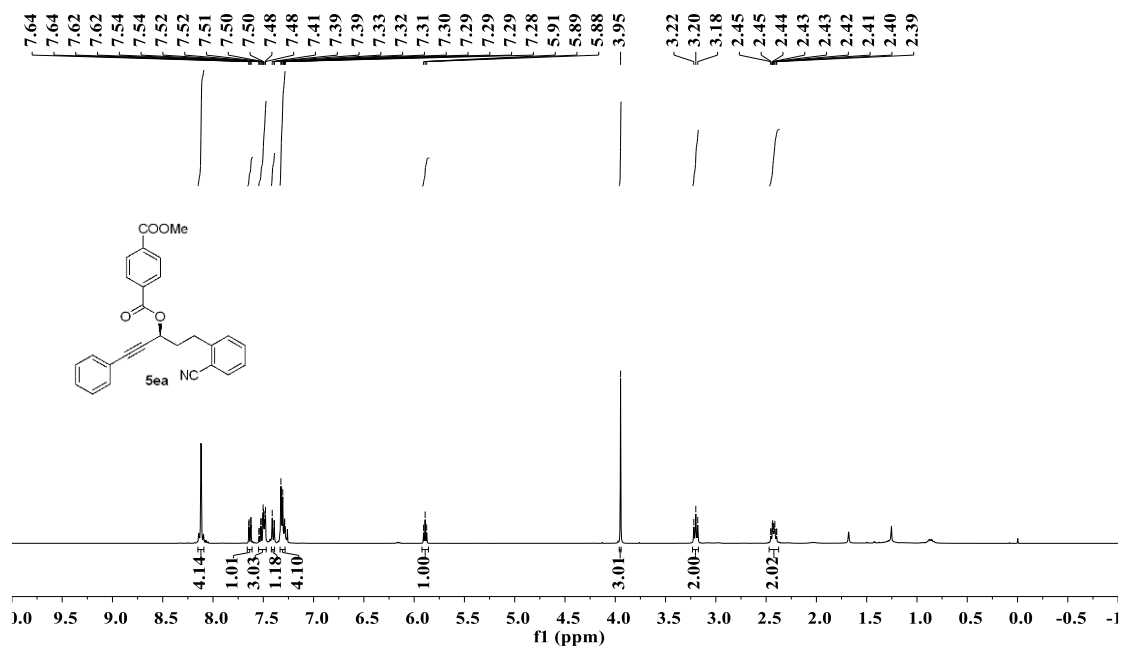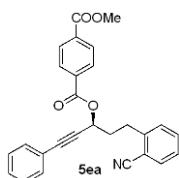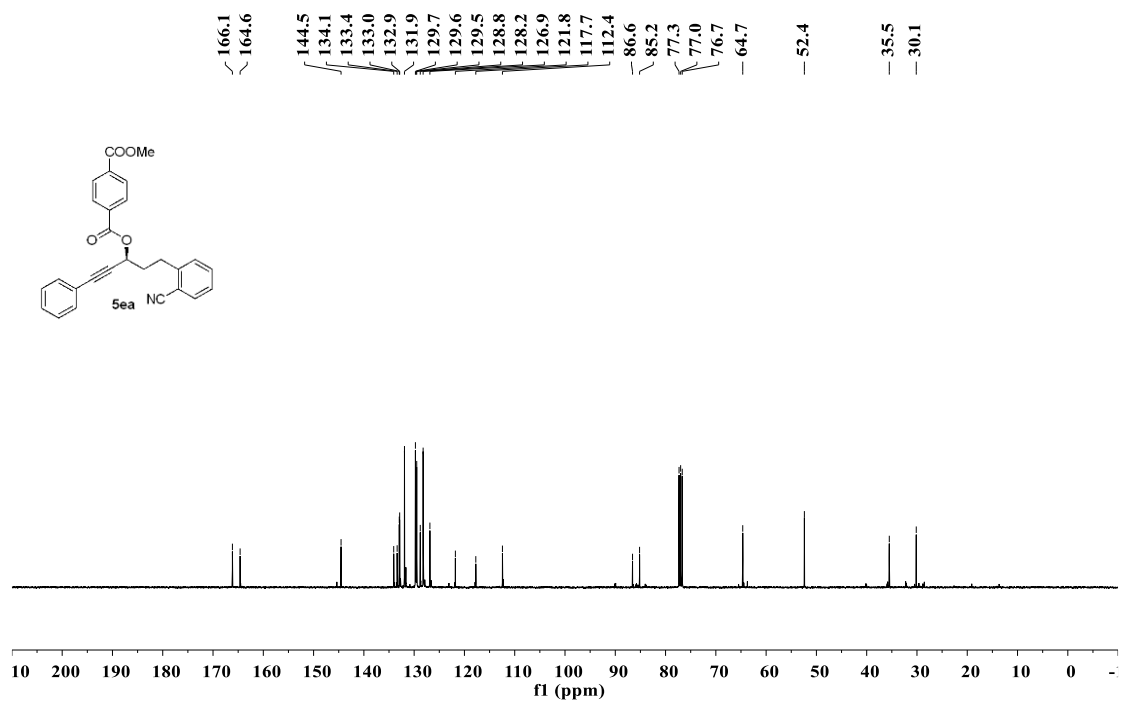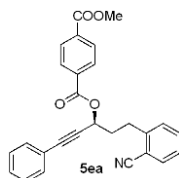

<sup>1</sup>H NMR (400 MHz, CDCl<sub>3</sub>) and <sup>13</sup>C NMR (100 MHz, CDCl<sub>3</sub>) spectra of product 5fa

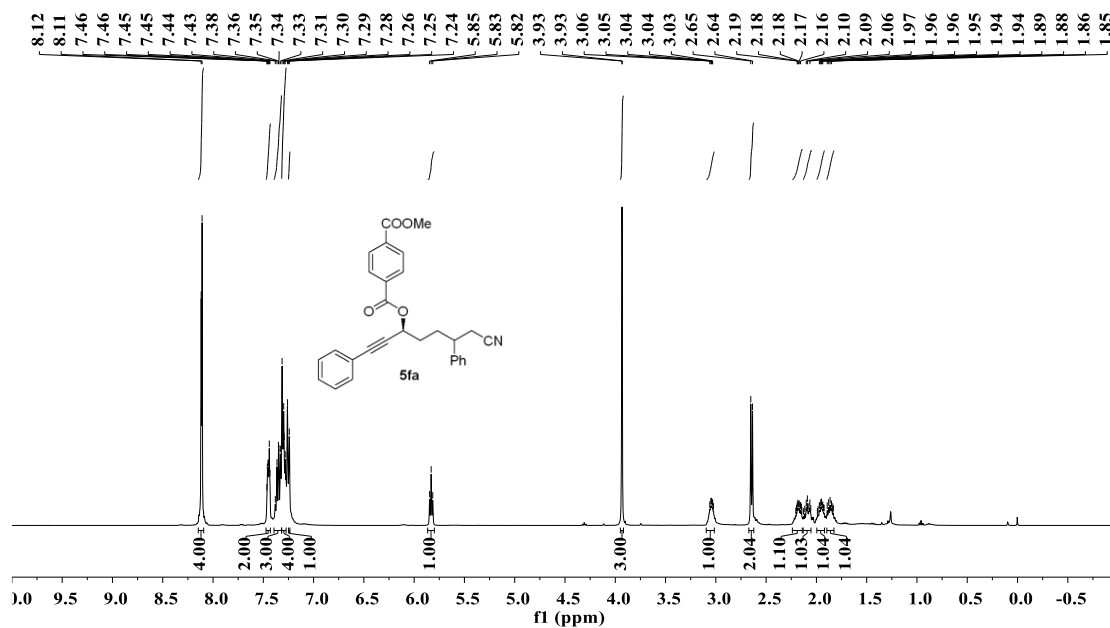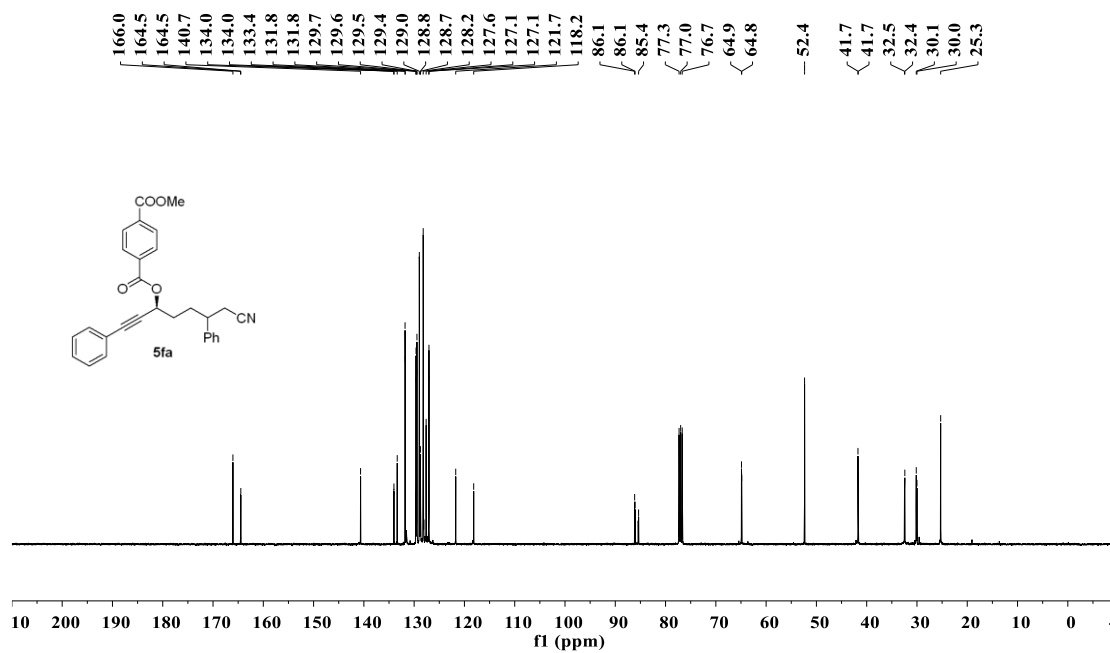

$^1\text{H}$  NMR (400 MHz,  $\text{CDCl}_3$ ) and  $^{13}\text{C}$  NMR (100 MHz,  $\text{CDCl}_3$ ) spectra of product **5cc**

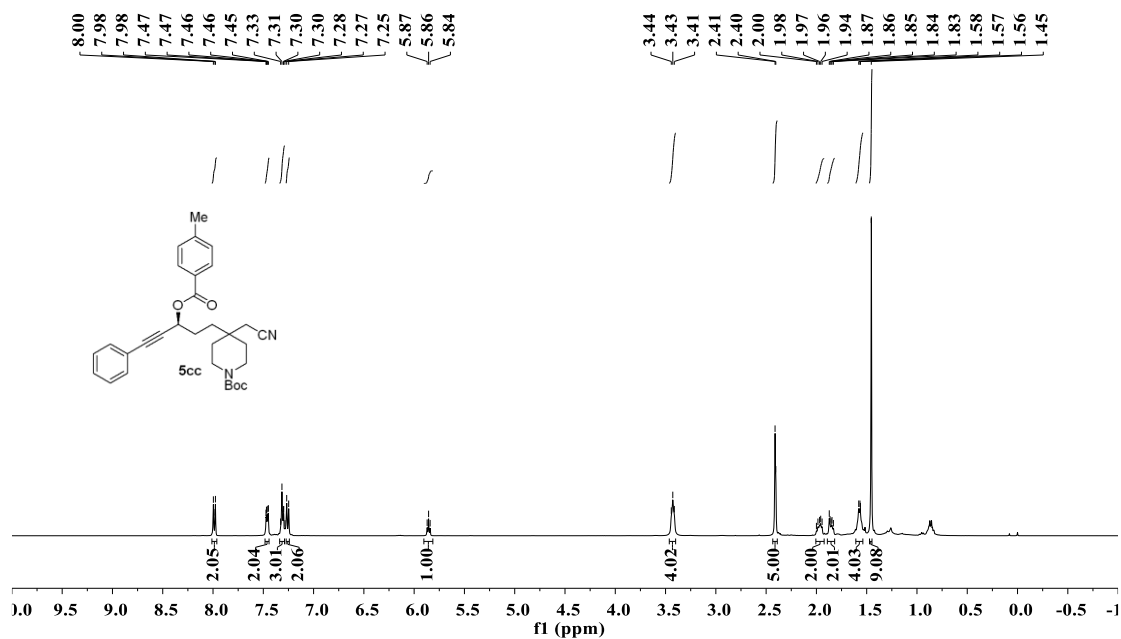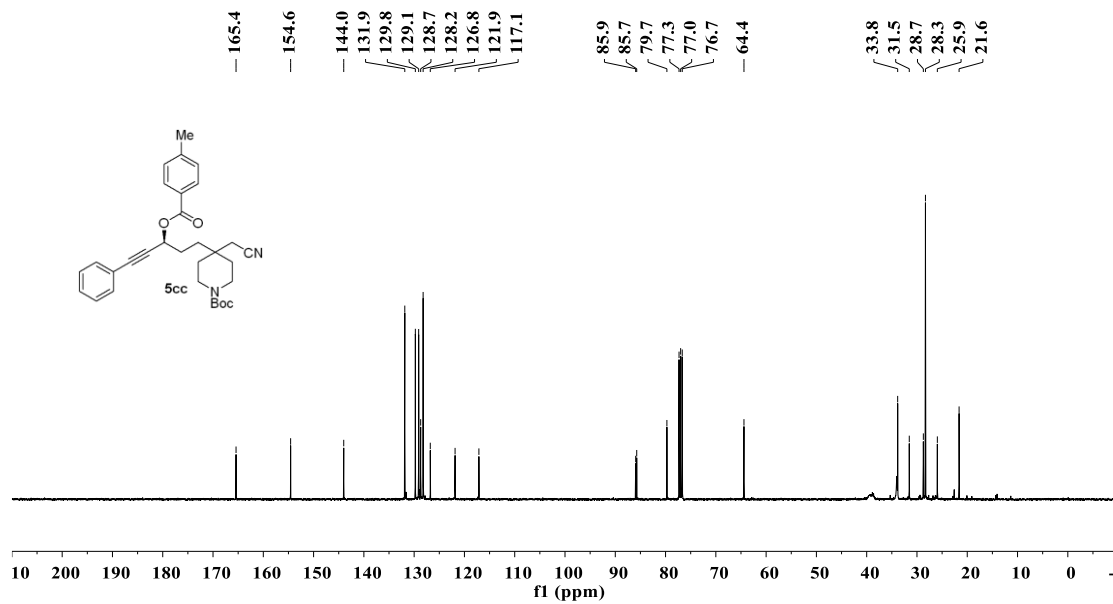

<sup>1</sup>H NMR (400 MHz, CDCl<sub>3</sub>) and <sup>13</sup>C NMR (100 MHz, CDCl<sub>3</sub>) spectra of product 5ga

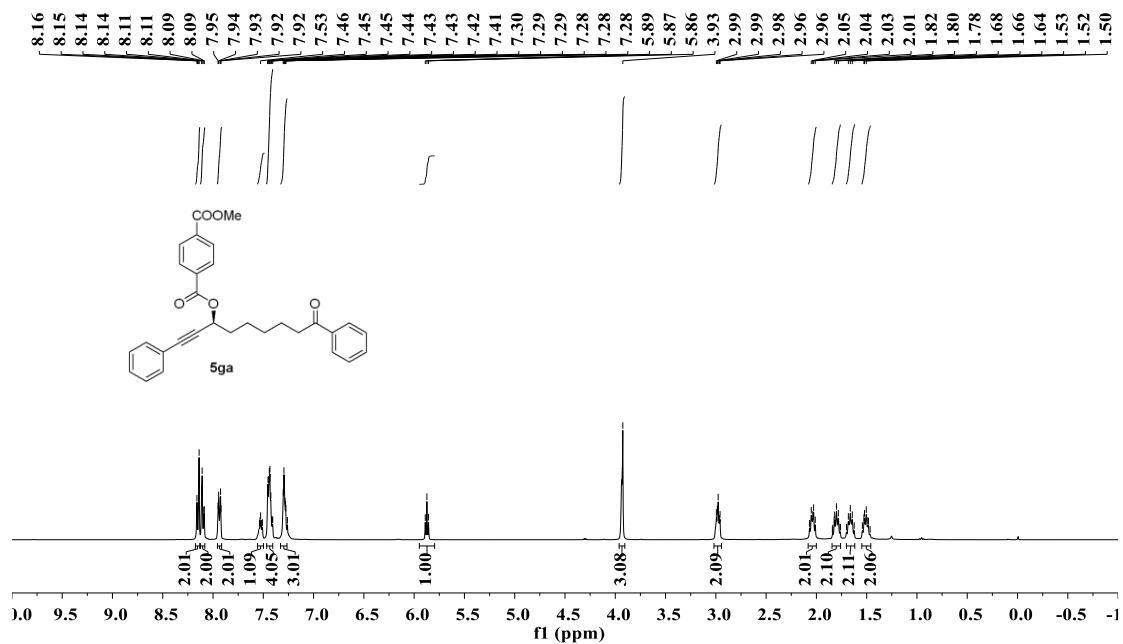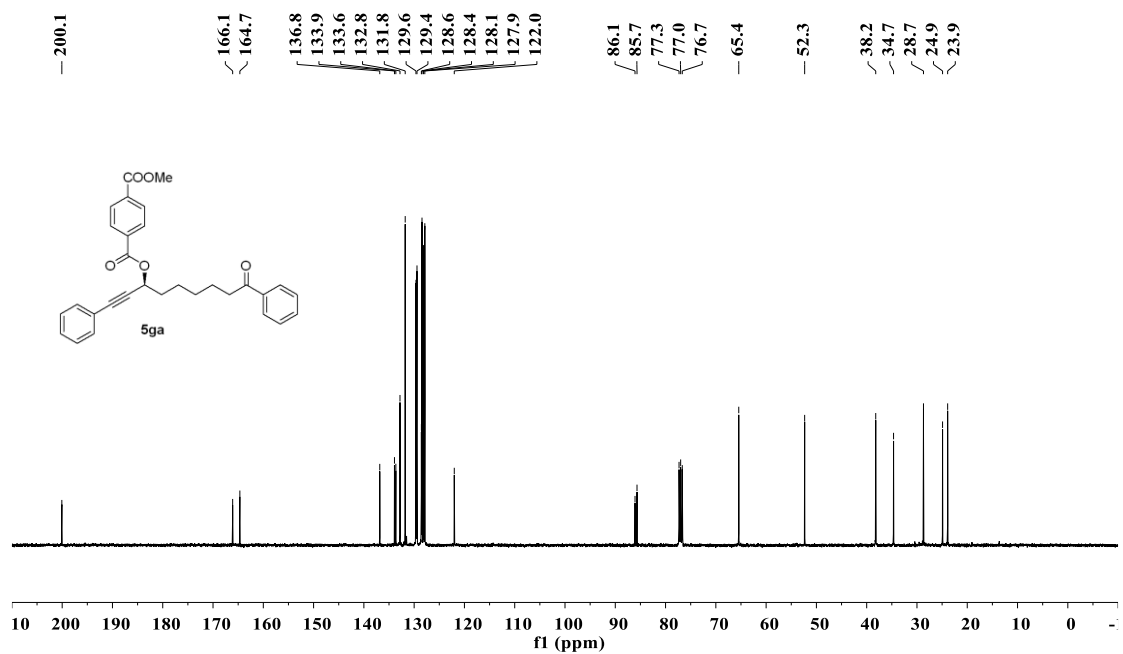



<sup>1</sup>H NMR (400 MHz, CDCl<sub>3</sub>) and <sup>13</sup>C NMR (100 MHz, CDCl<sub>3</sub>) spectra of product 7ab

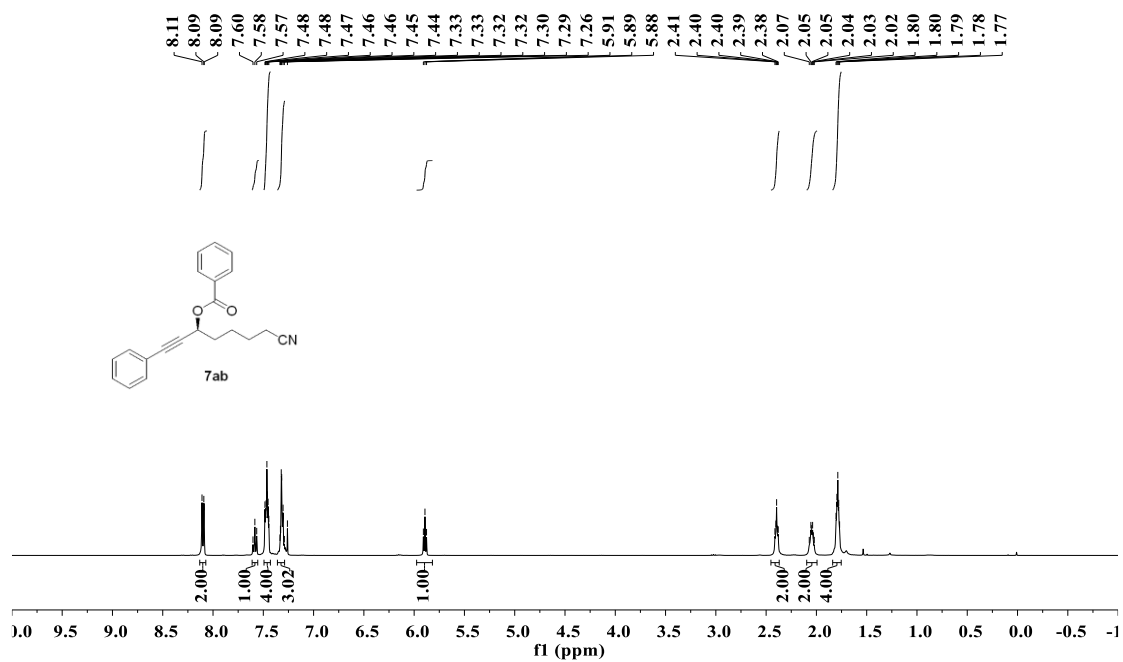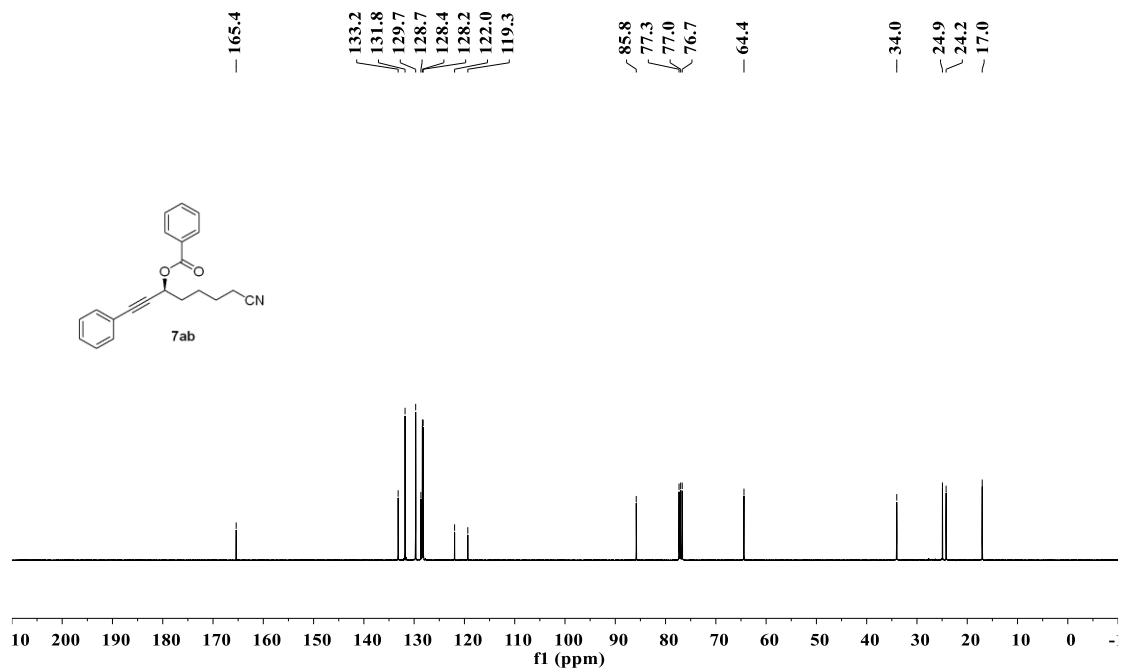

$^1\text{H}$  NMR (400 MHz,  $\text{CDCl}_3$ ) and  $^{13}\text{C}$  NMR (100 MHz,  $\text{CDCl}_3$ ) spectra of product **7ac**

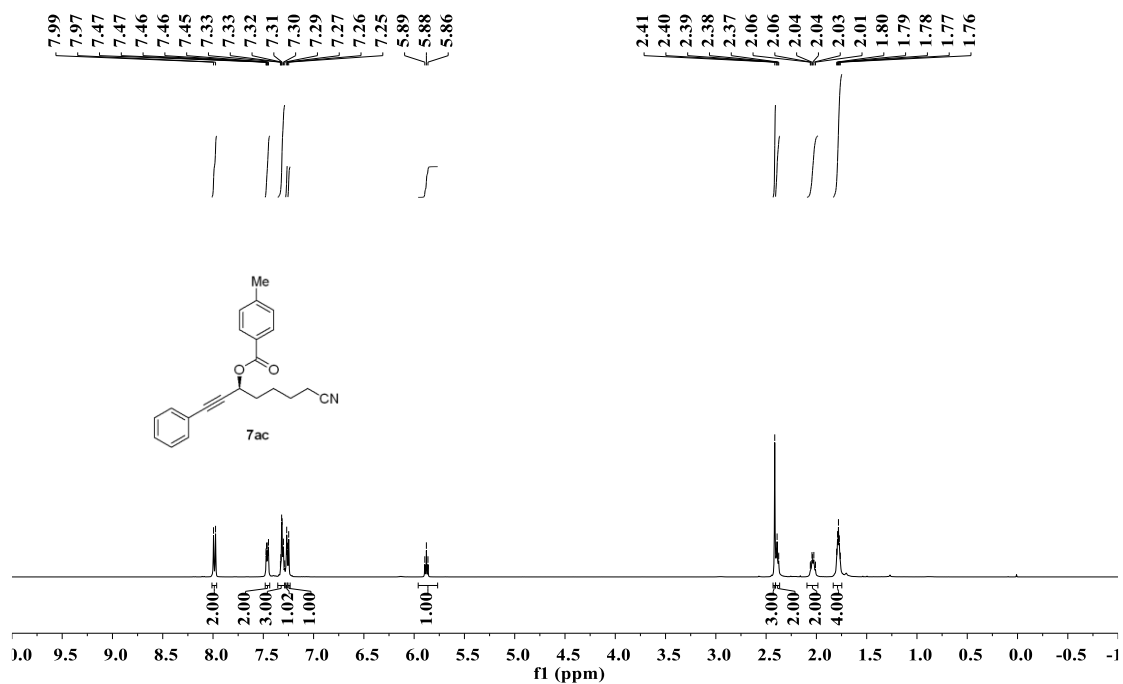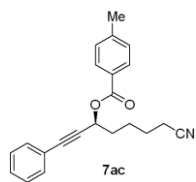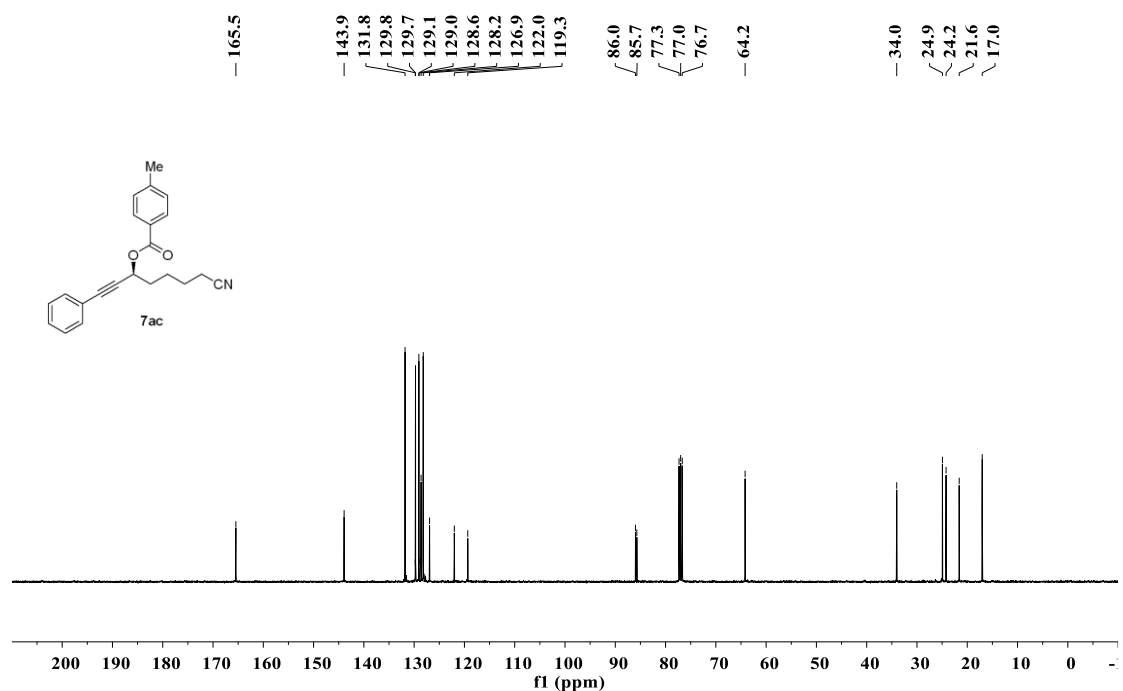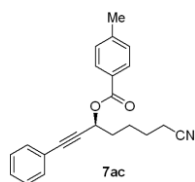

<sup>1</sup>H NMR (400 MHz, CDCl<sub>3</sub>) and <sup>13</sup>C NMR (100 MHz, CDCl<sub>3</sub>) spectra of product 7ad

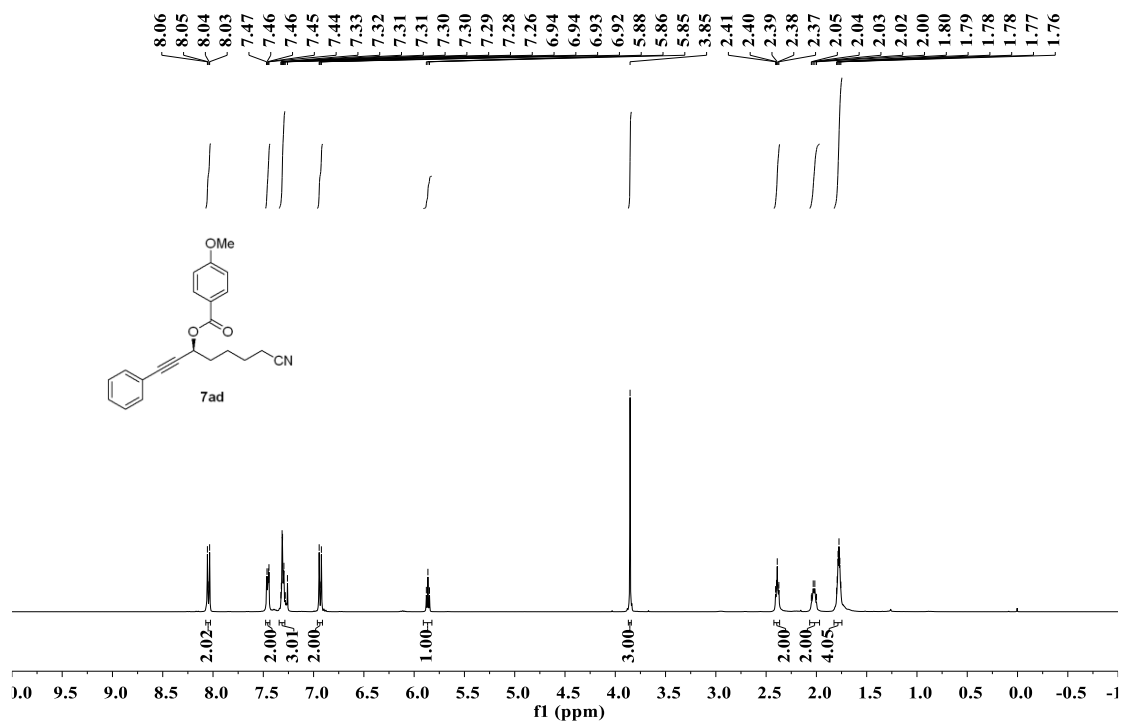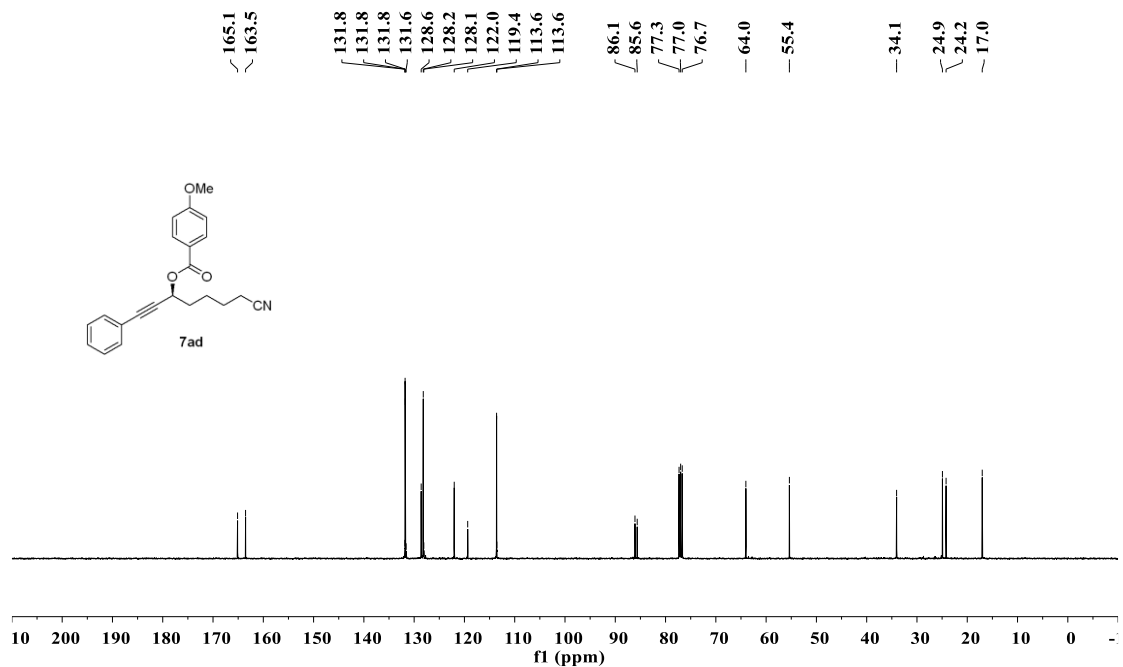

$^1\text{H}$  NMR (400 MHz,  $\text{CDCl}_3$ ) and  $^{13}\text{C}$  NMR (100 MHz,  $\text{CDCl}_3$ ) spectra of product 7ae

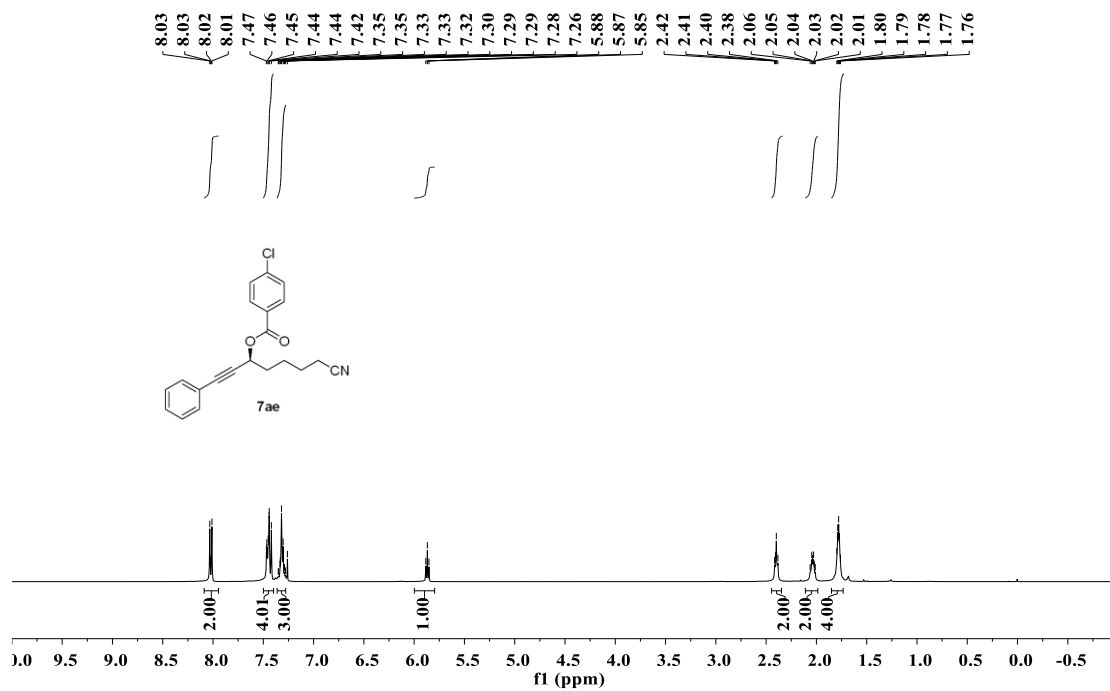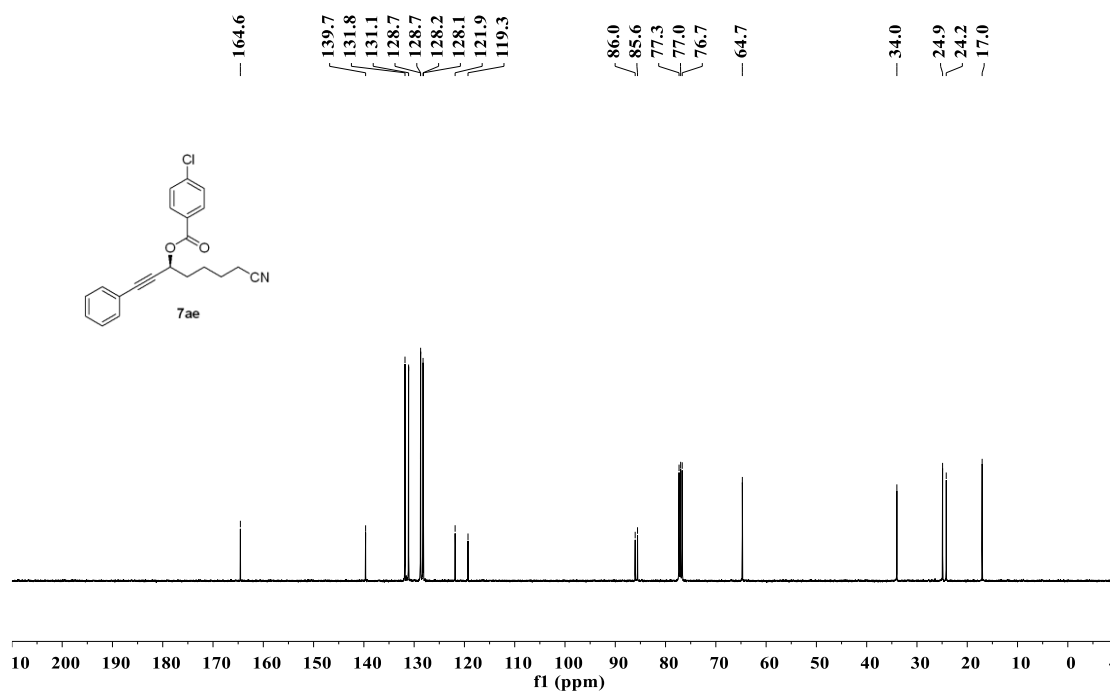

<sup>1</sup>H NMR (400 MHz, CDCl<sub>3</sub>) and <sup>13</sup>C NMR (100 MHz, CDCl<sub>3</sub>) spectra of product 7af

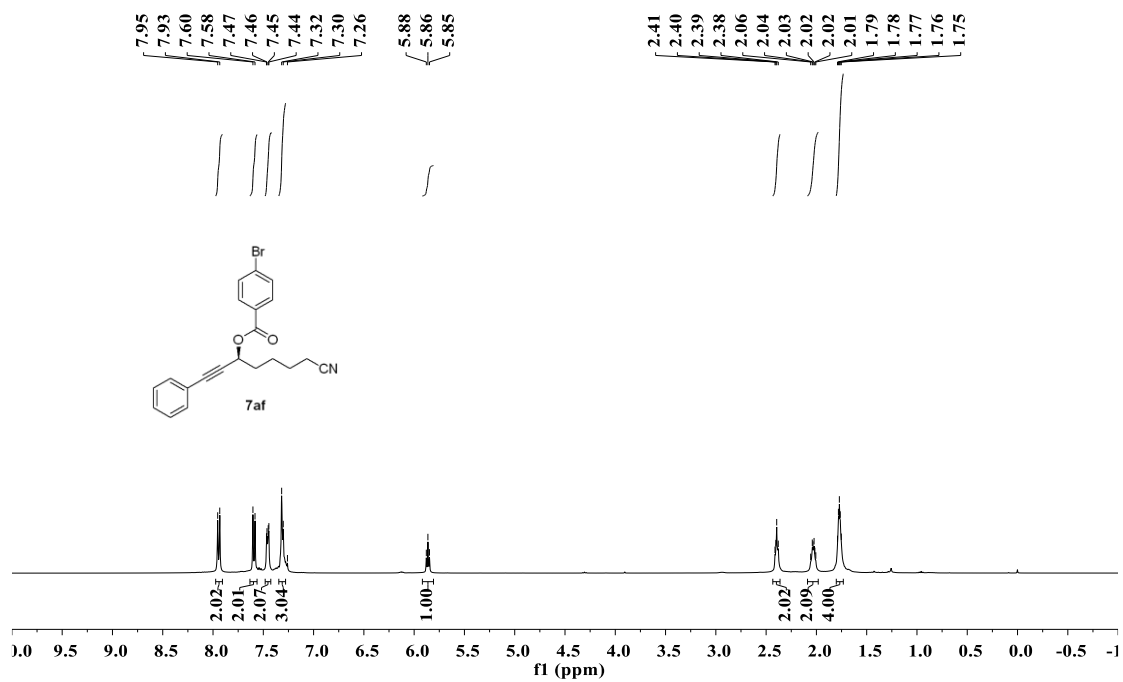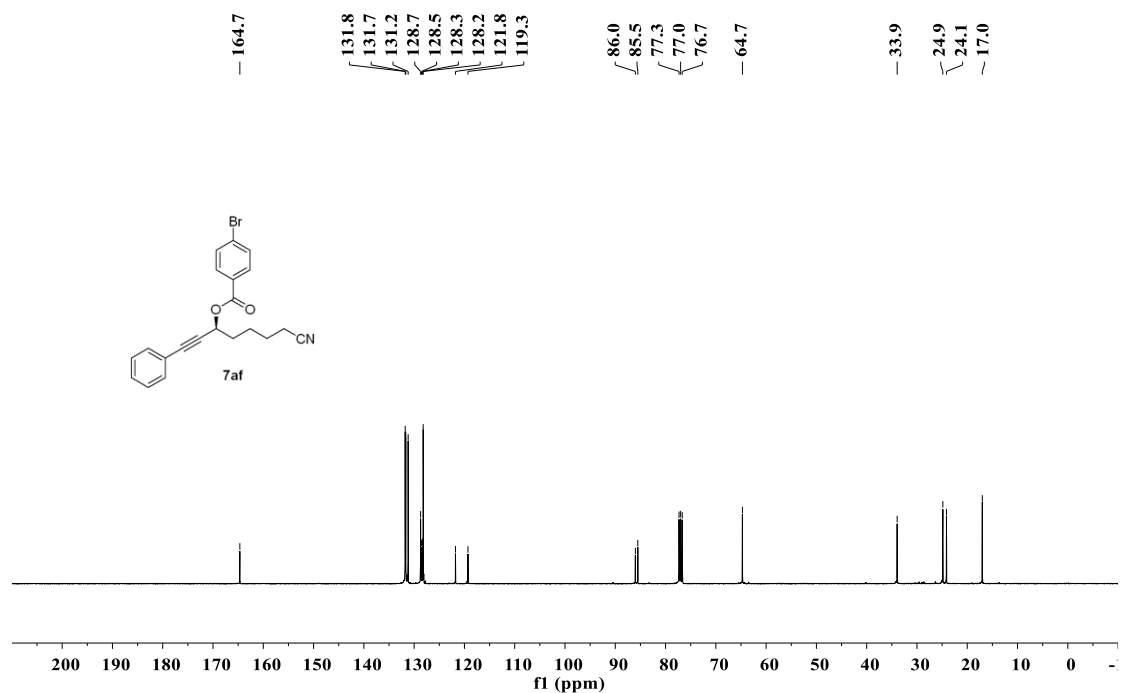

<sup>1</sup>H NMR (400 MHz, CDCl<sub>3</sub>), <sup>13</sup>C NMR (100 MHz, CDCl<sub>3</sub>) and <sup>19</sup>F (376 MHz) spectra of product 7ag

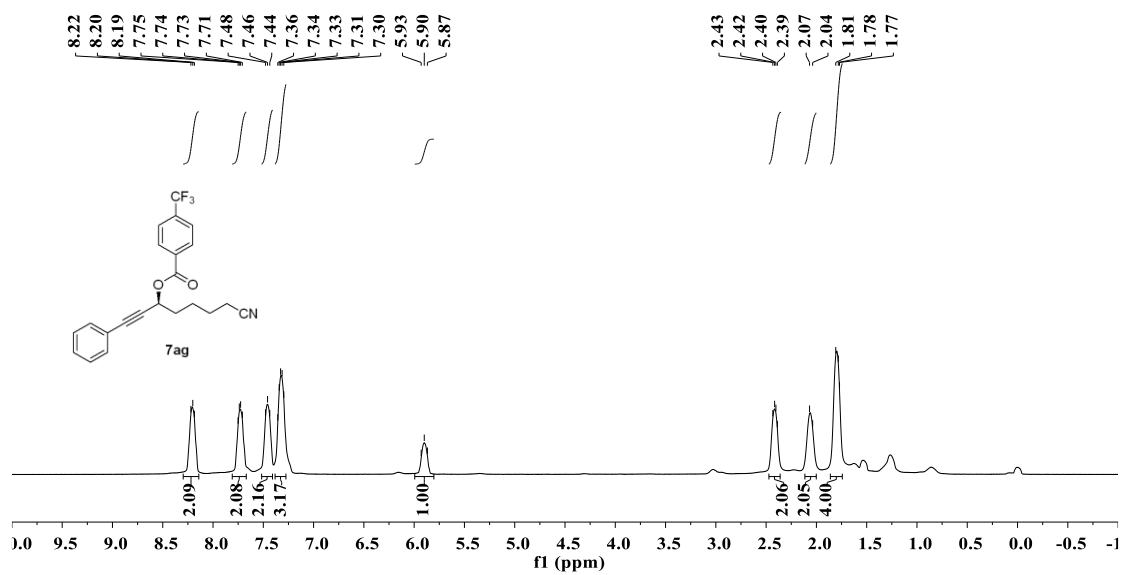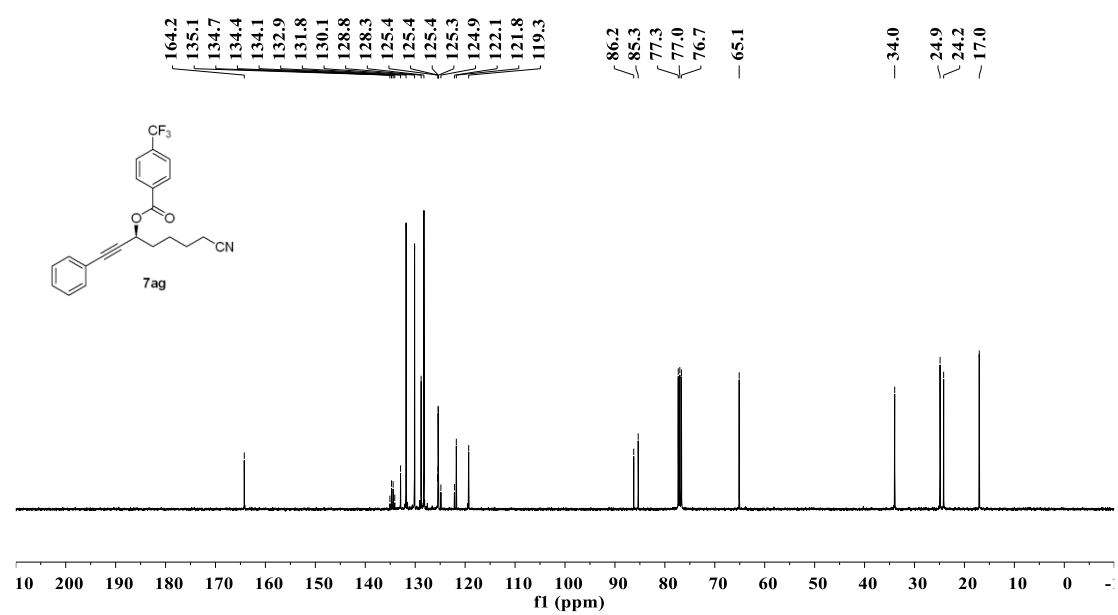

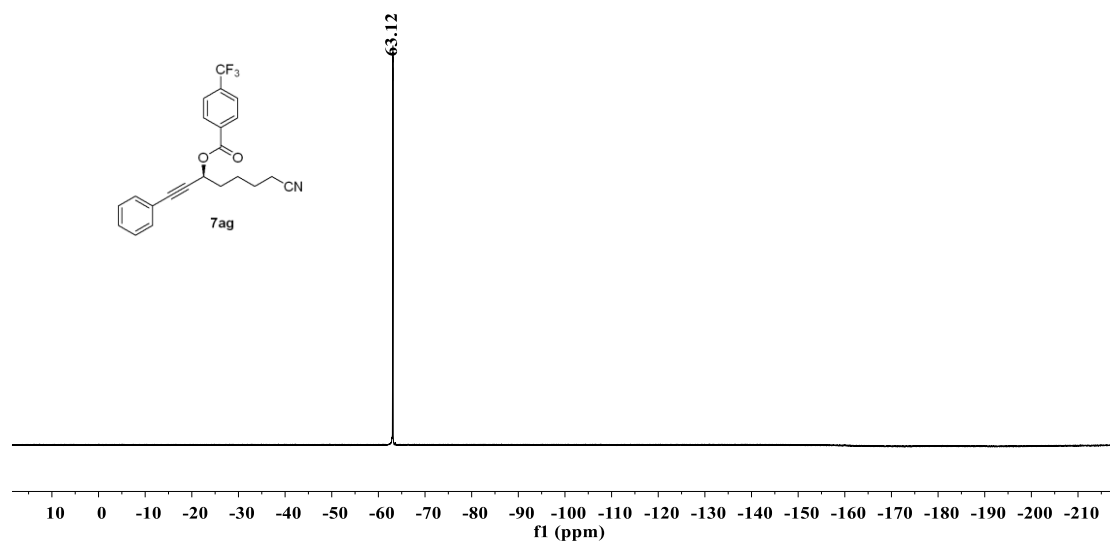

<sup>1</sup>H NMR (400 MHz, CDCl<sub>3</sub>) and <sup>13</sup>C NMR (100 MHz, CDCl<sub>3</sub>) spectra of product 7ah

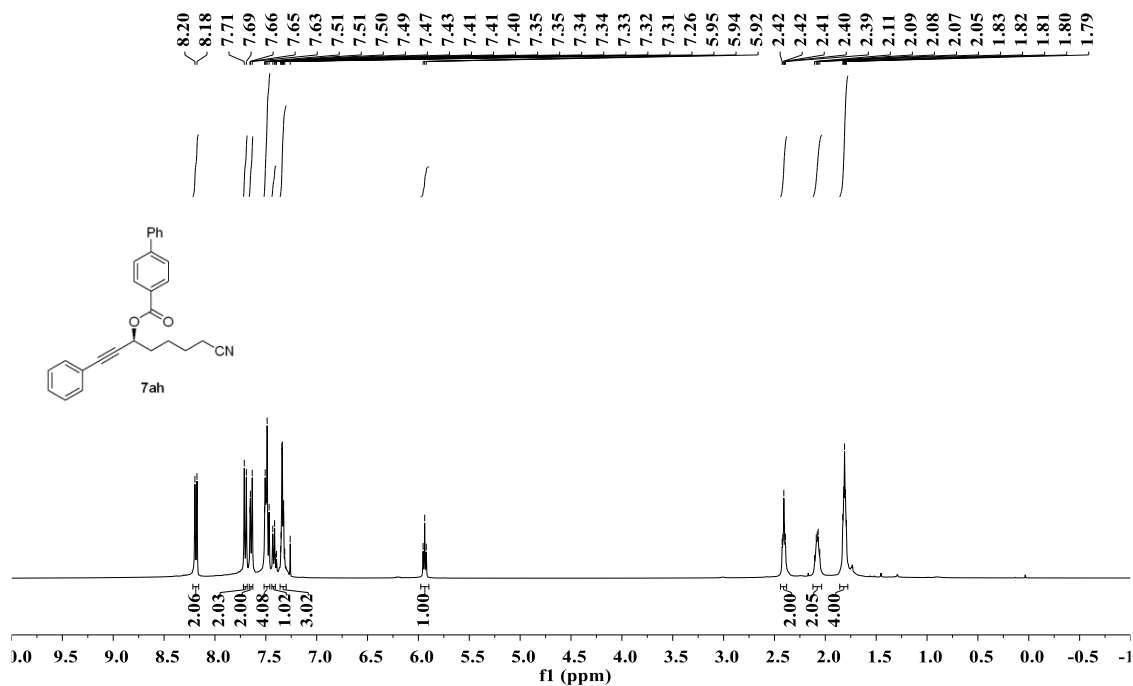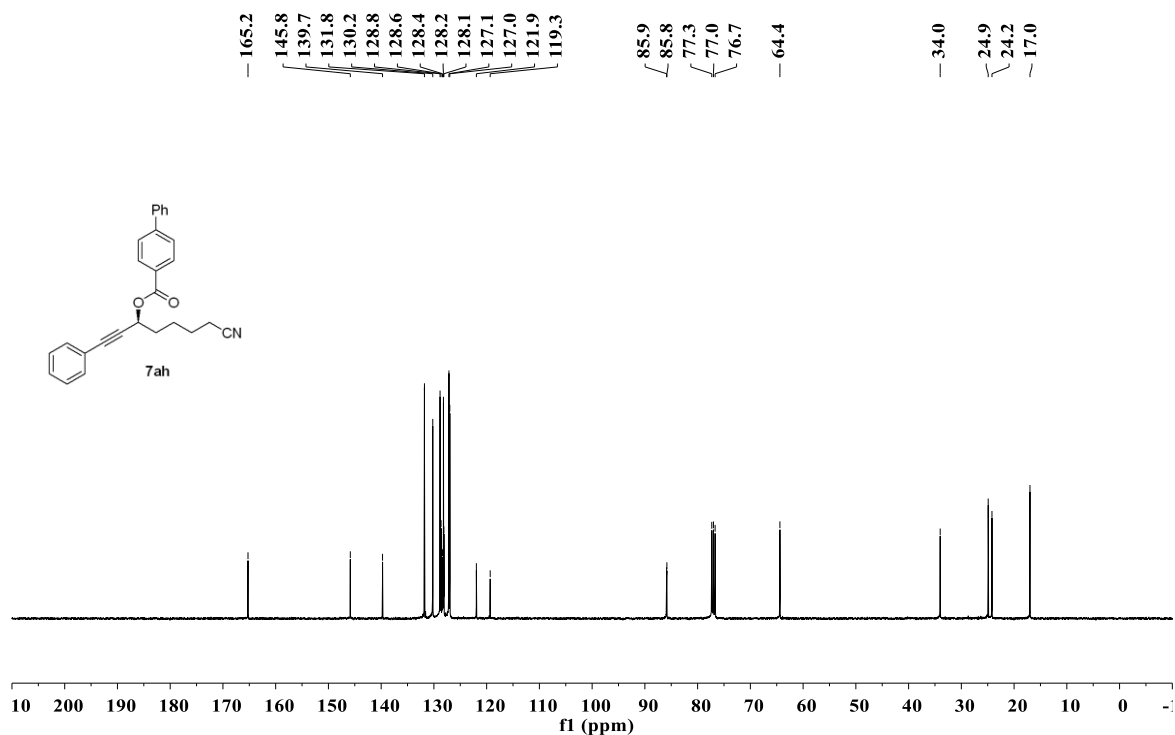



<sup>1</sup>H NMR (400 MHz, CDCl<sub>3</sub>) and <sup>13</sup>C NMR (100 MHz, CDCl<sub>3</sub>) spectra of product 7ai

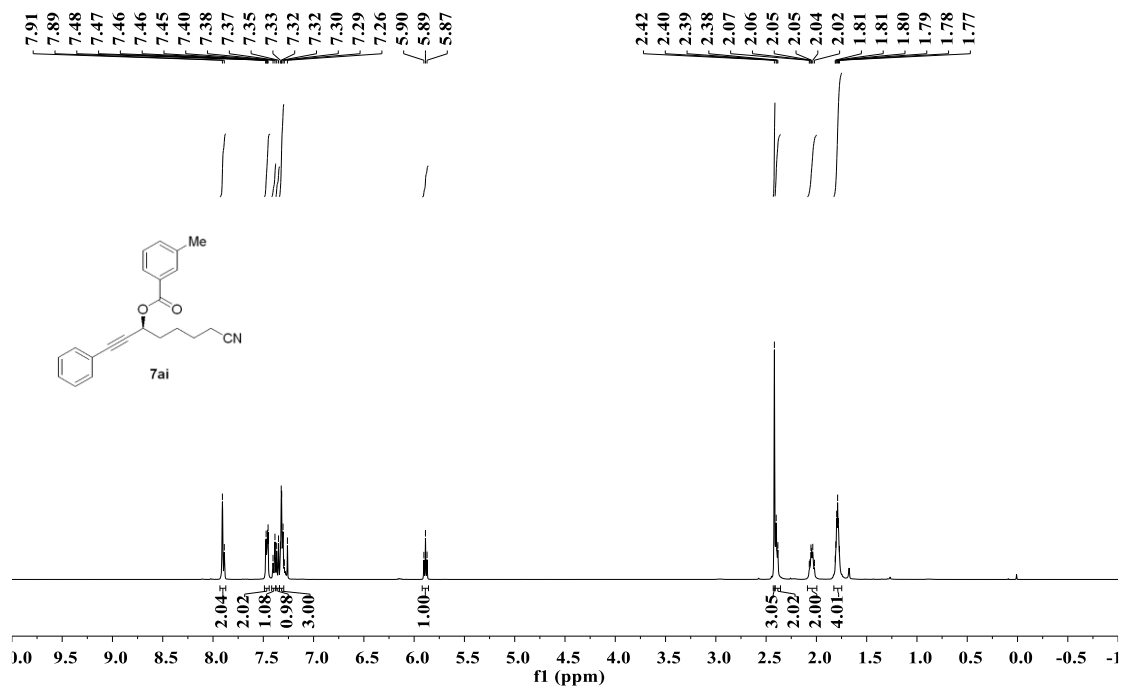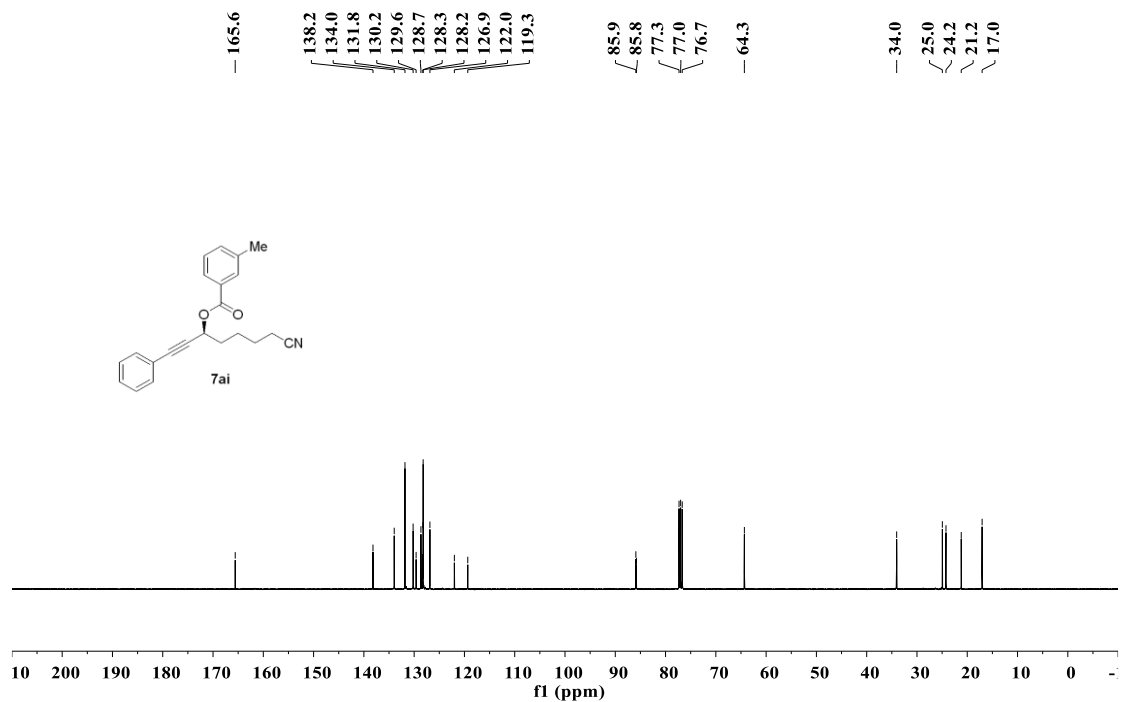

<sup>1</sup>H NMR (400 MHz, CDCl<sub>3</sub>) and <sup>13</sup>C NMR (100 MHz, CDCl<sub>3</sub>) of product 7aj

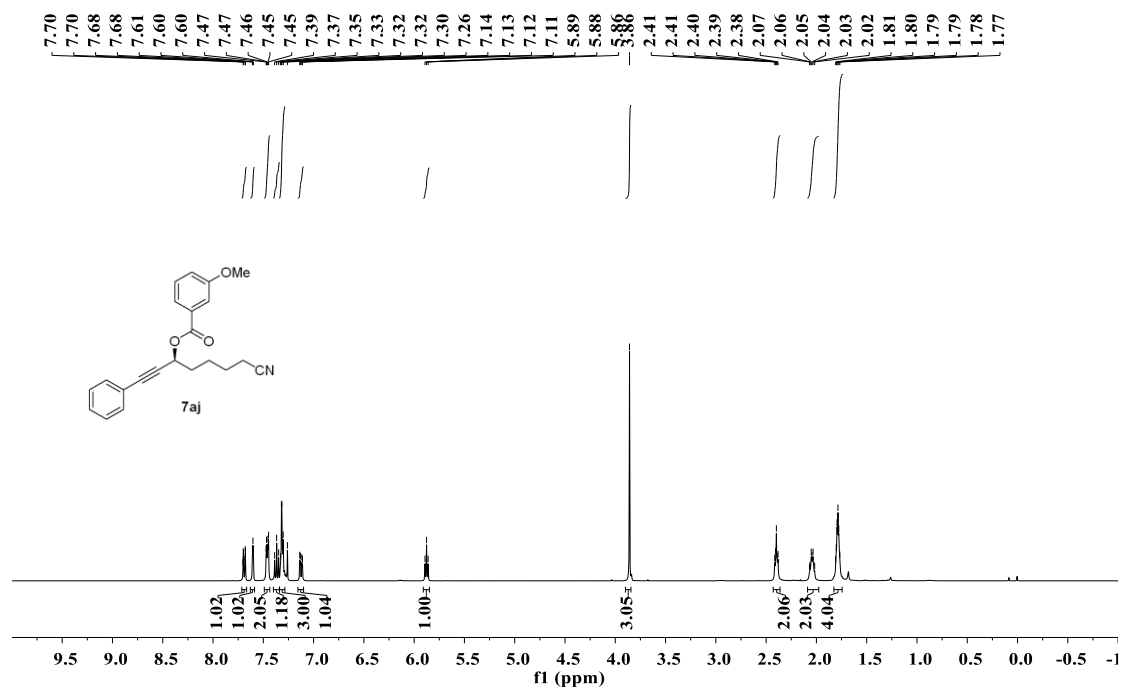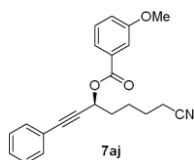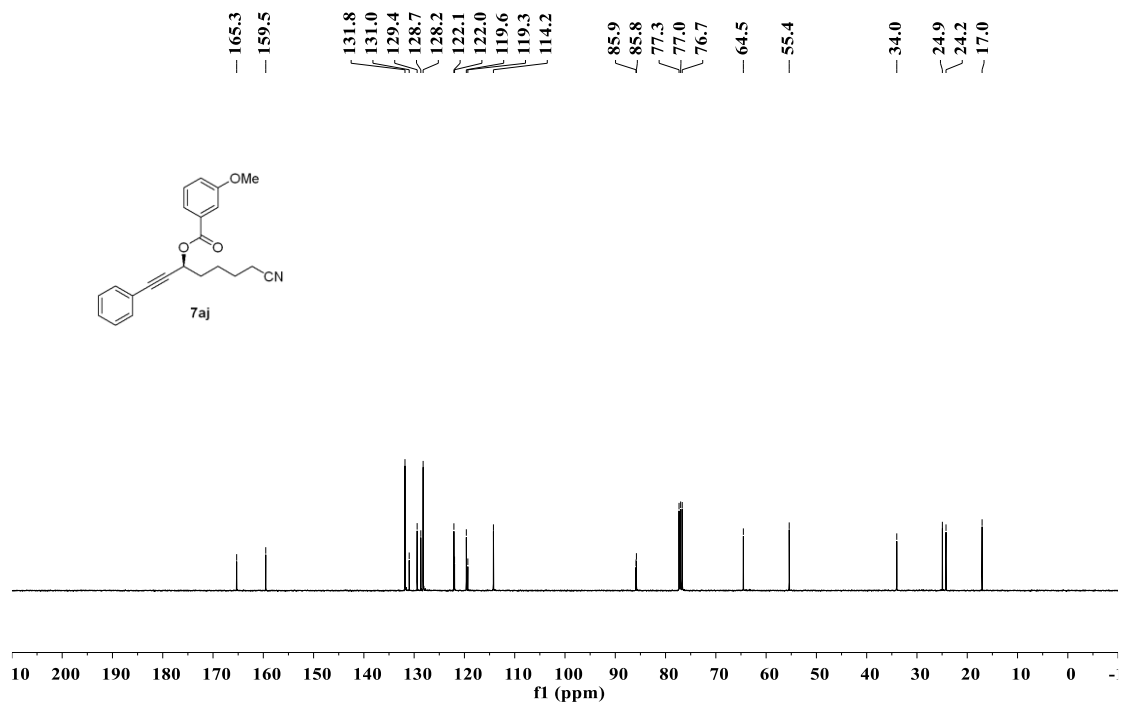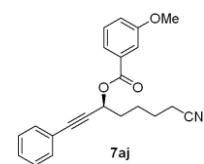

<sup>1</sup>H NMR (400 MHz, CDCl<sub>3</sub>) and <sup>13</sup>C NMR (100 MHz, CDCl<sub>3</sub>) spectra of product 7ak

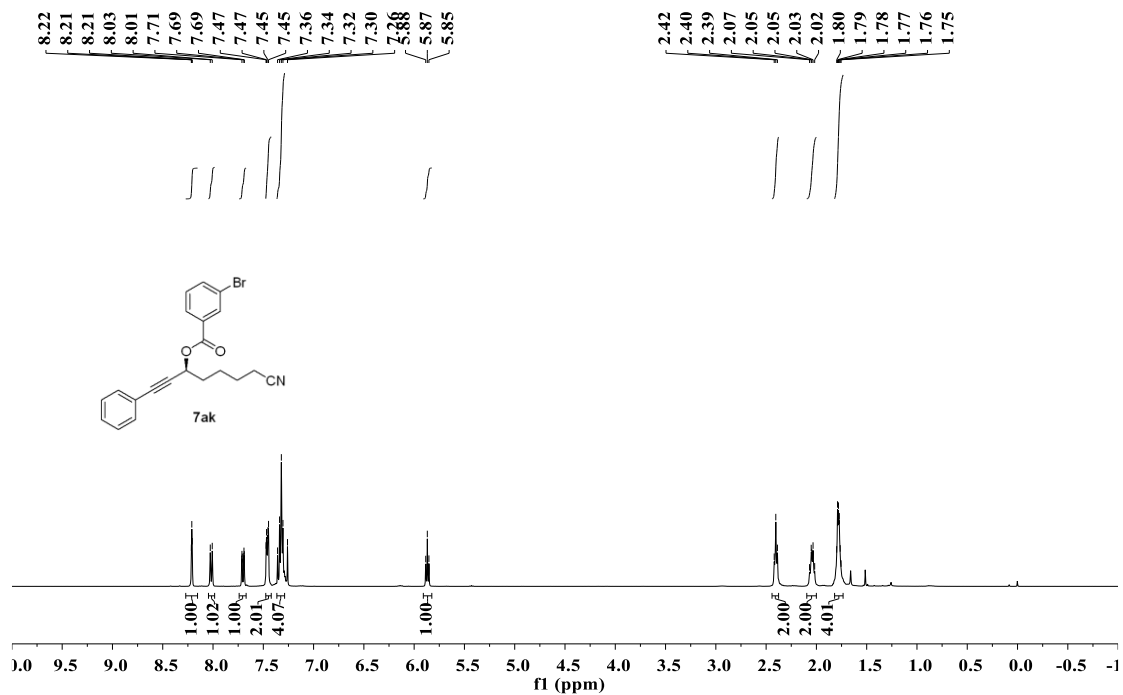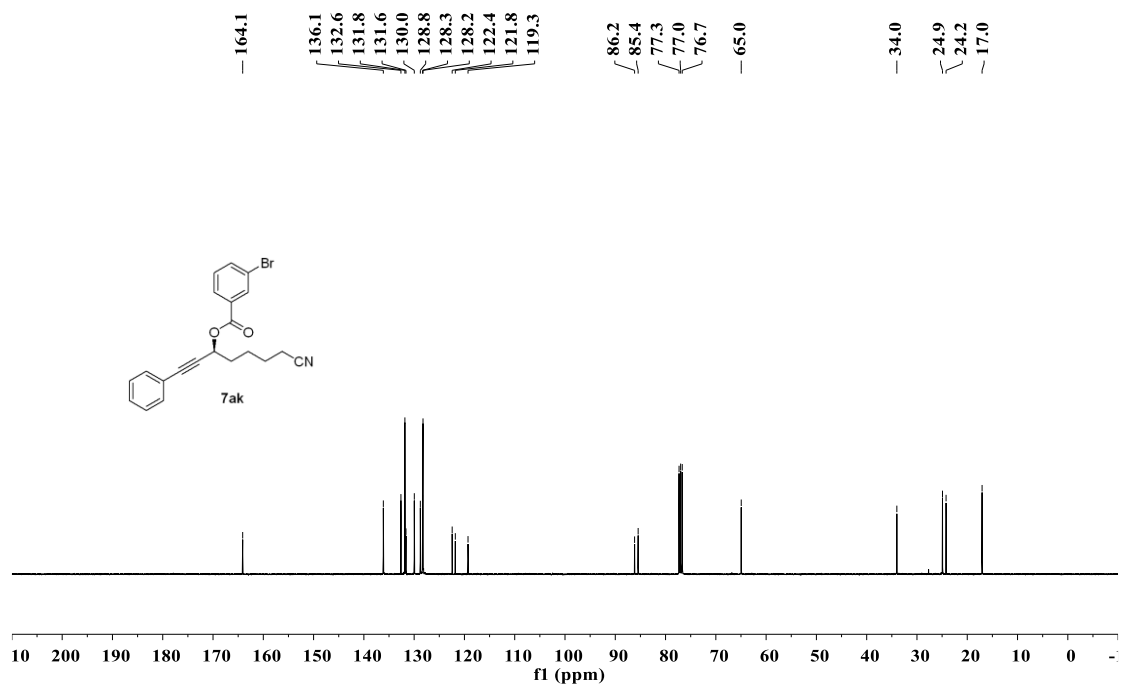

<sup>1</sup>H NMR (400 MHz, CDCl<sub>3</sub>) and <sup>13</sup>C NMR (100 MHz, CDCl<sub>3</sub>) spectra of product 7al

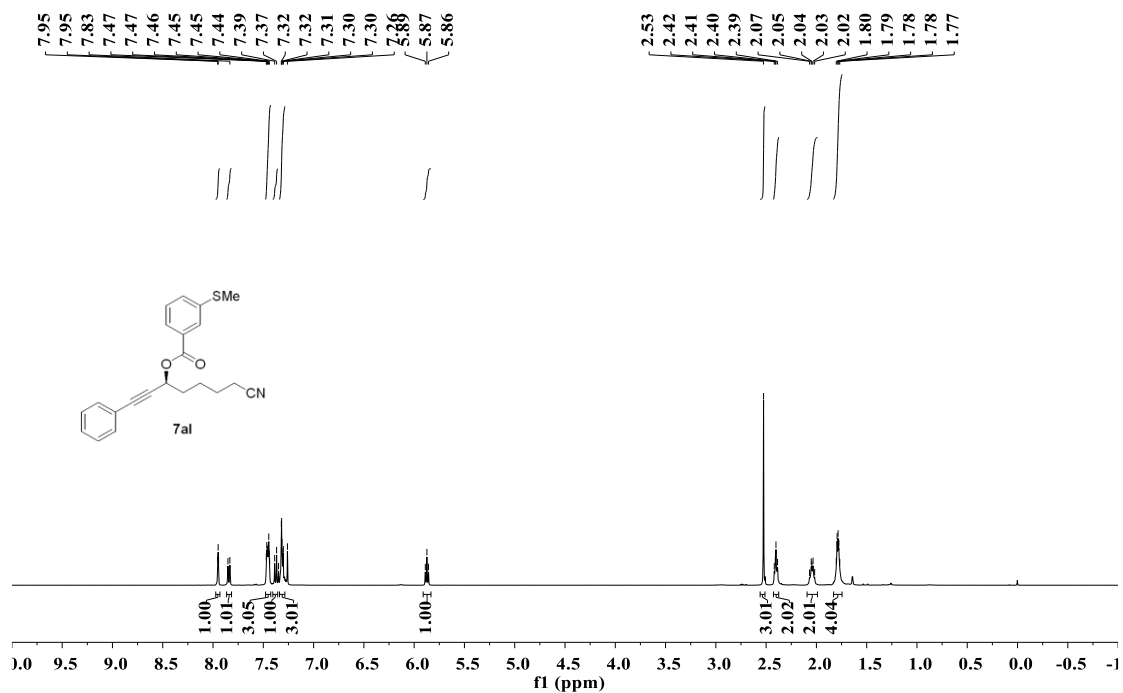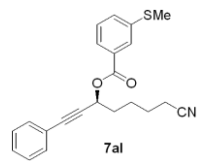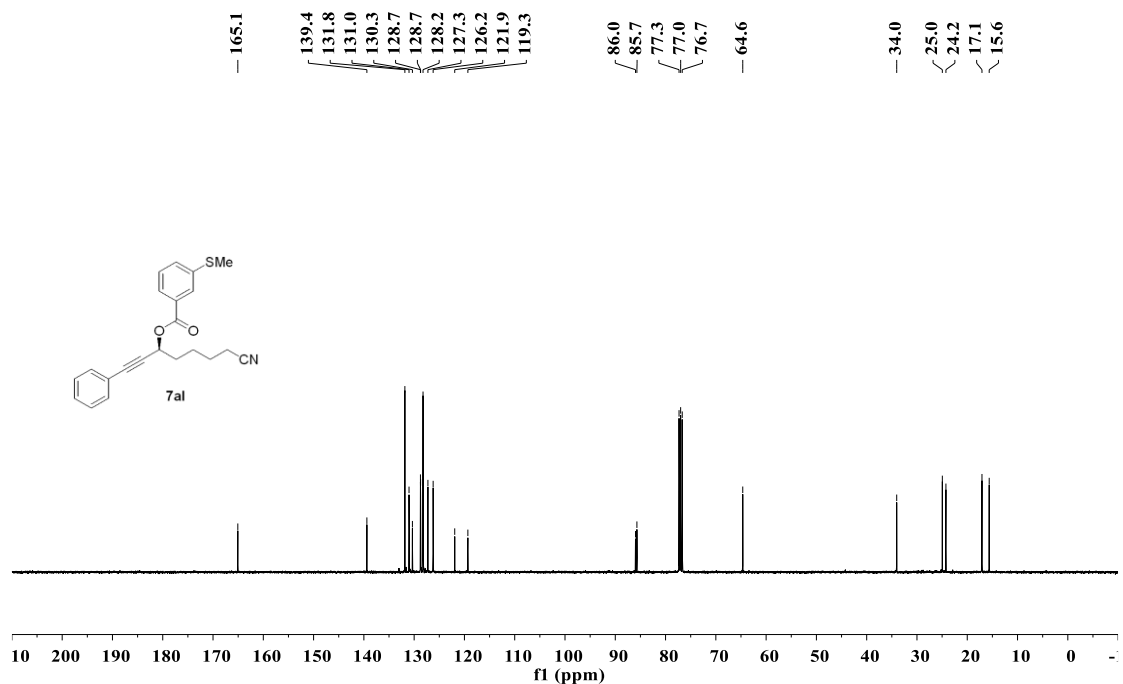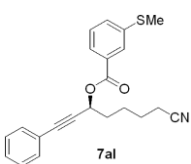

<sup>1</sup>H NMR (400 MHz, CDCl<sub>3</sub>) and <sup>13</sup>C NMR (100 MHz, CDCl<sub>3</sub>) spectra of product 7am

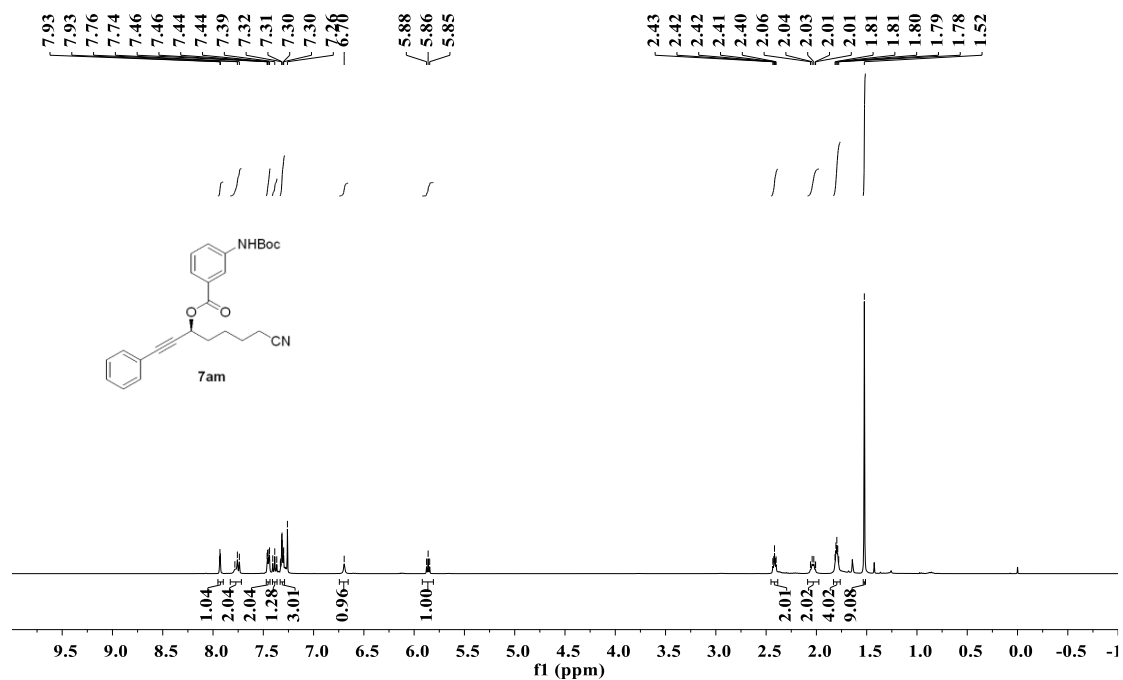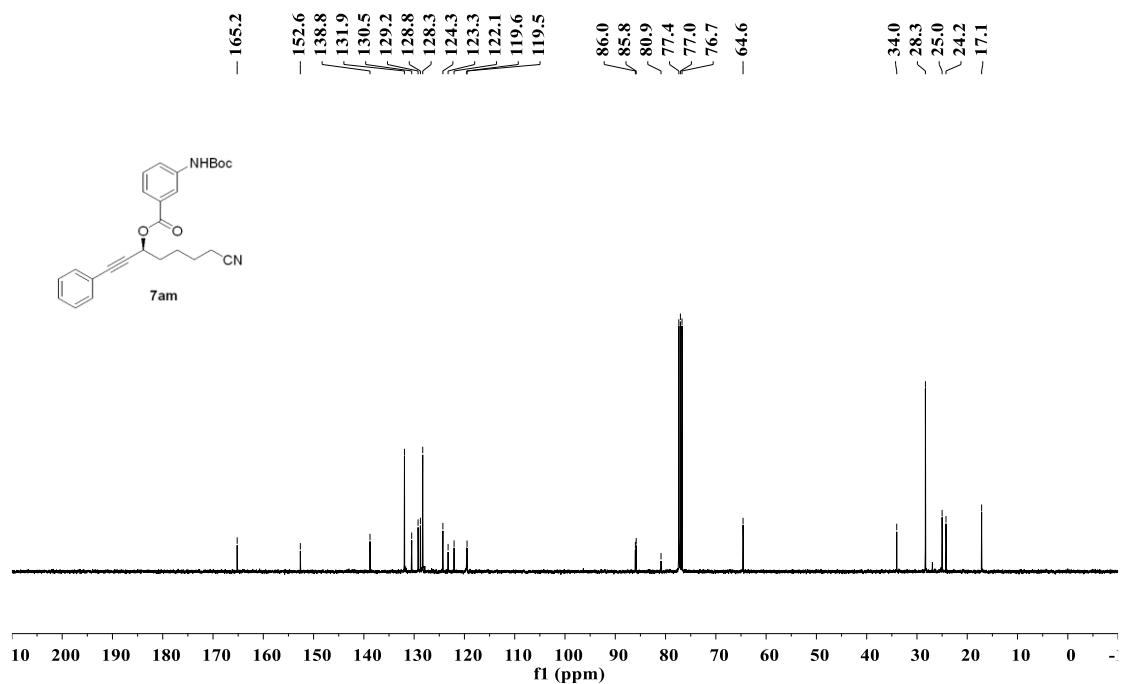

<sup>1</sup>H NMR (400 MHz, CDCl<sub>3</sub>) and <sup>13</sup>C NMR (100 MHz, CDCl<sub>3</sub>) spectra of product 7an

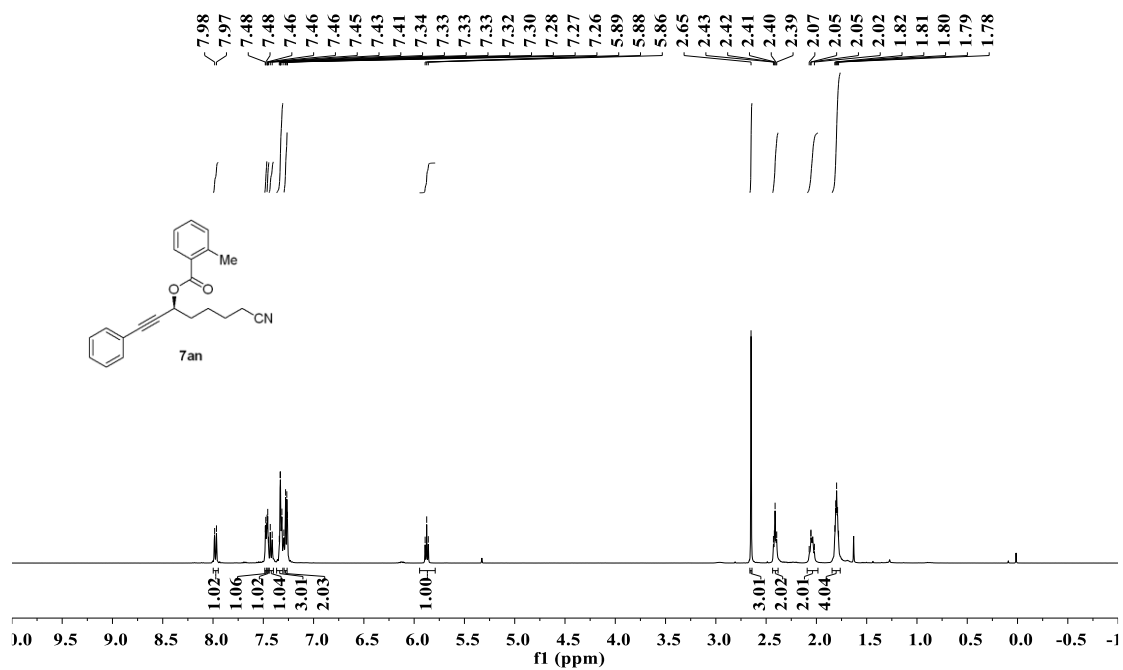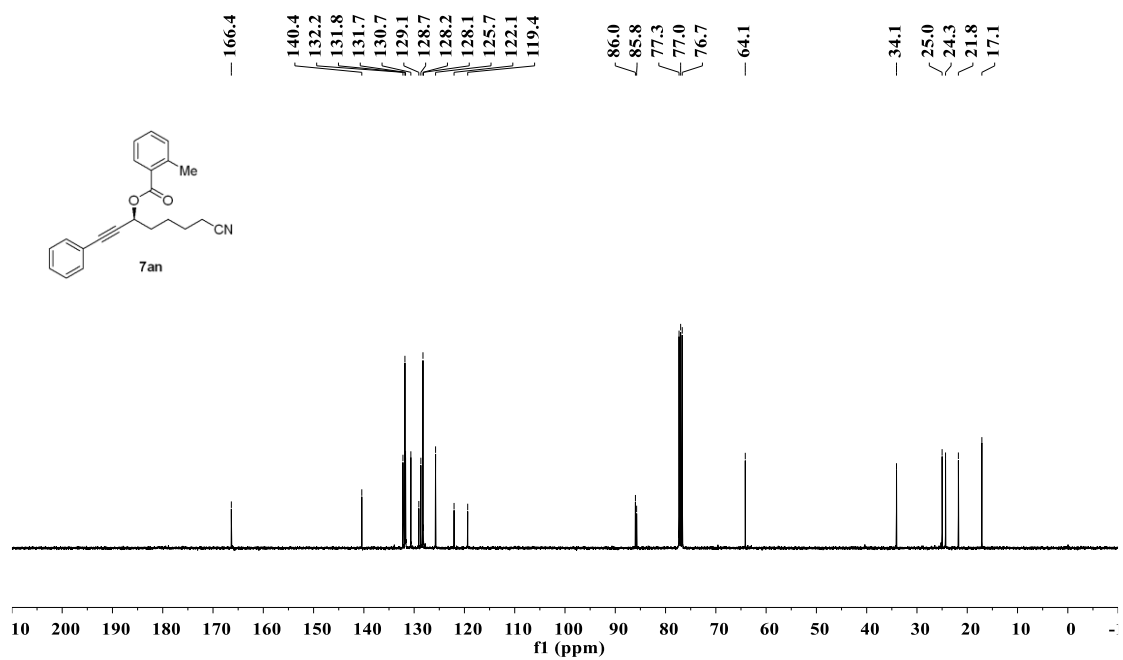

$^1\text{H}$  NMR (400 MHz,  $\text{CDCl}_3$ ) and  $^{13}\text{C}$  NMR (100 MHz,  $\text{CDCl}_3$ ) spectra of product 7ao

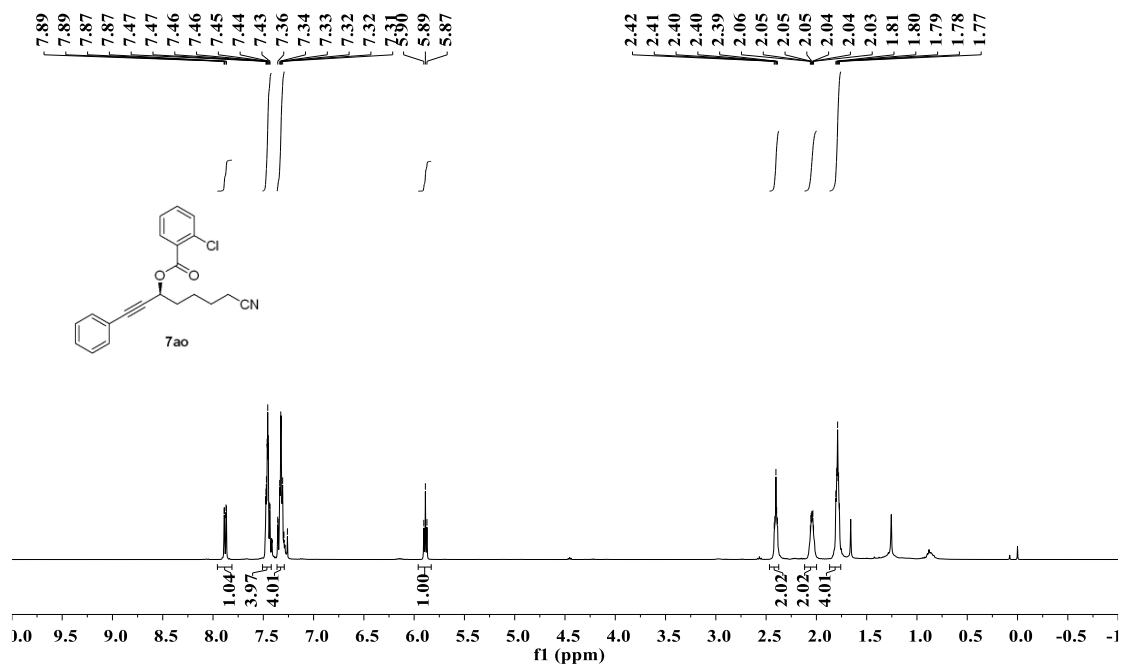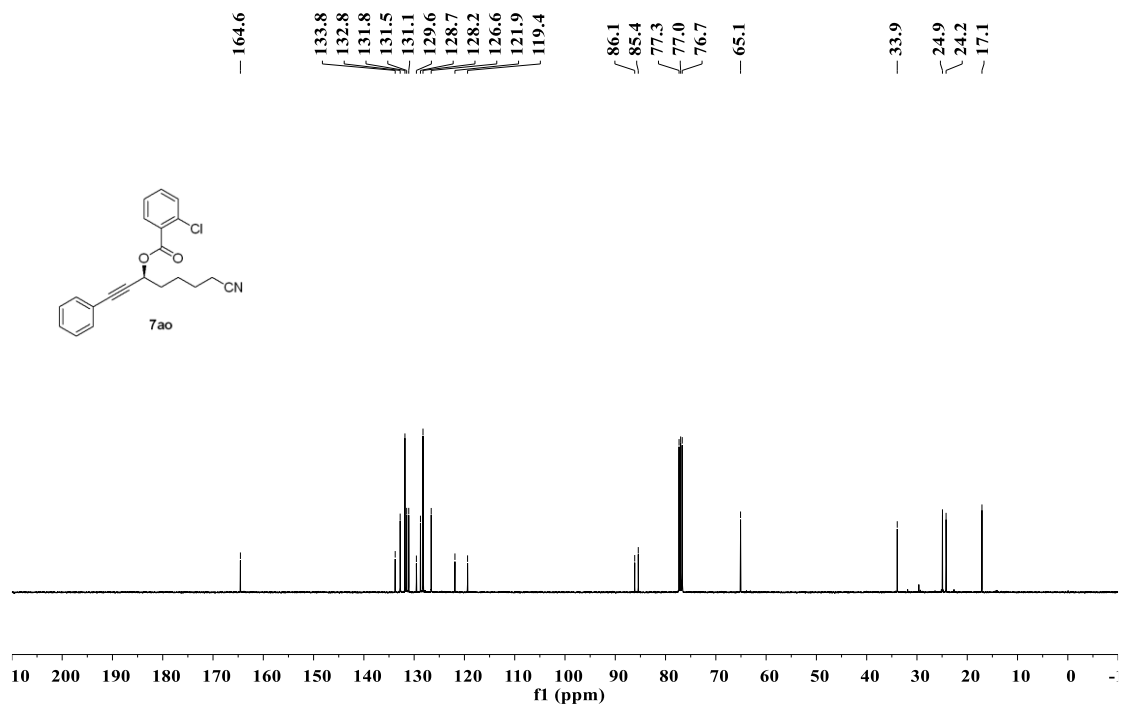

<sup>1</sup>H NMR (400 MHz, CDCl<sub>3</sub>) and <sup>13</sup>C NMR (100 MHz, CDCl<sub>3</sub>) spectra of product 7ap

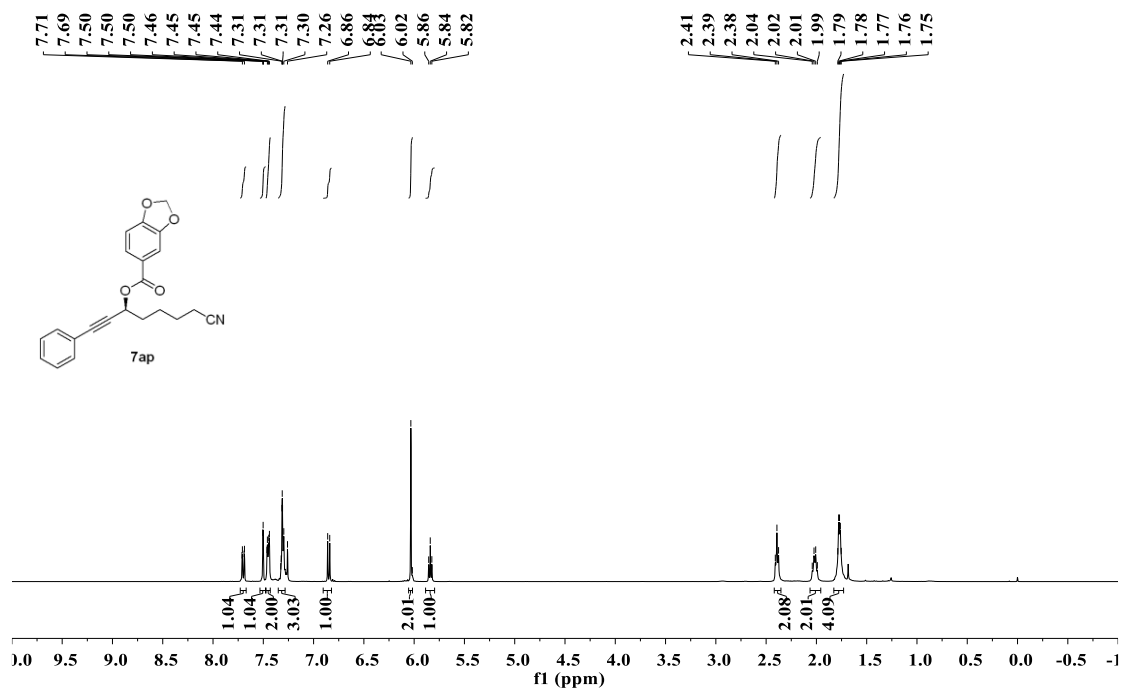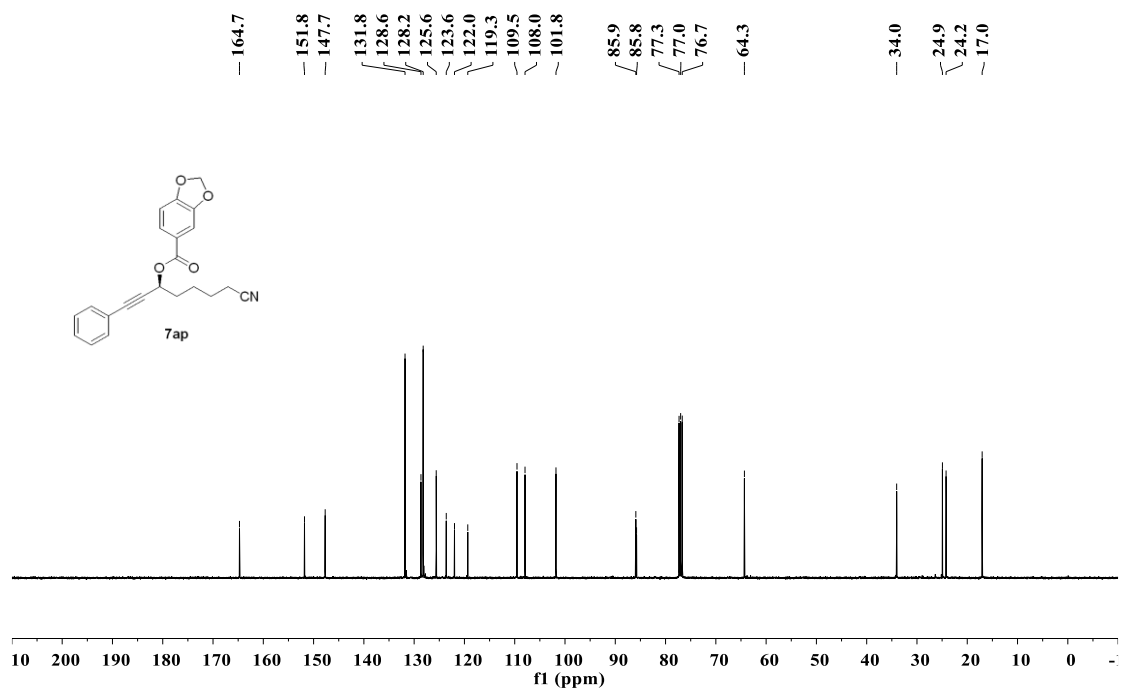



$^1\text{H}$  NMR (400 MHz,  $\text{CDCl}_3$ ) and  $^{13}\text{C}$  NMR (100 MHz,  $\text{CDCl}_3$ ) spectra of product 7aq

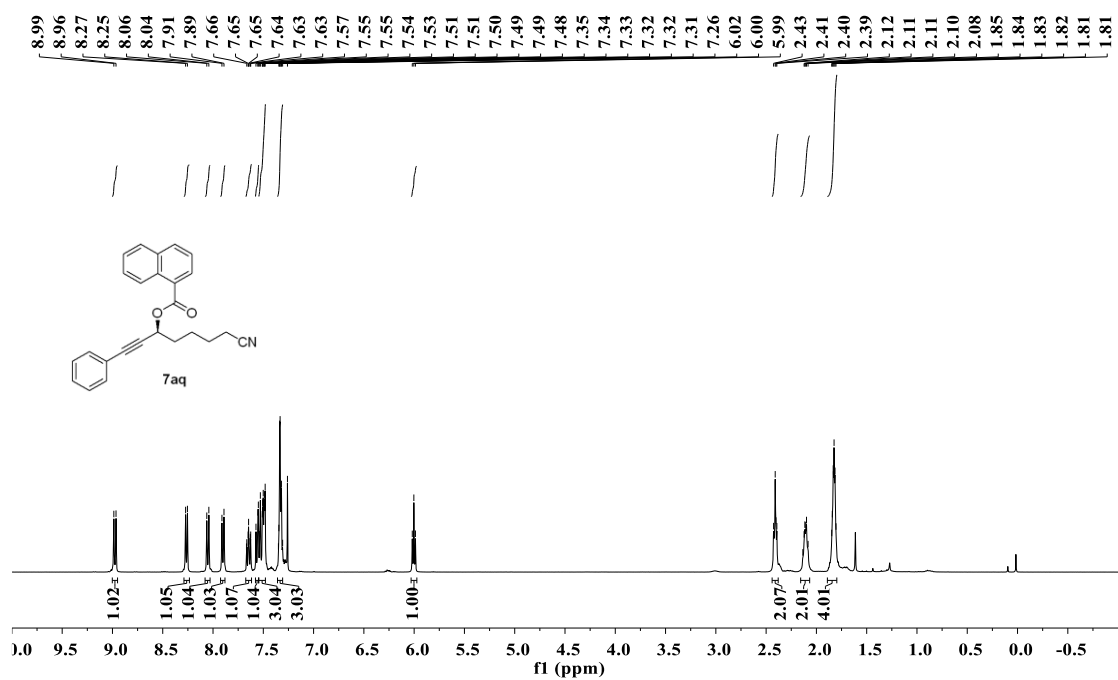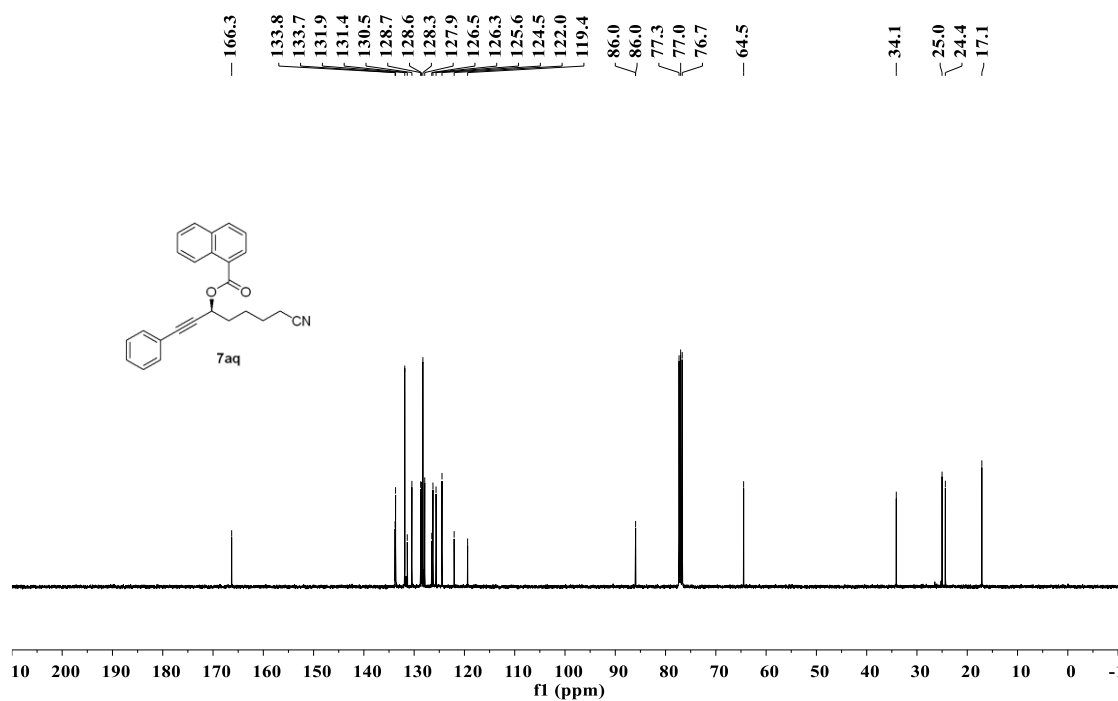

<sup>1</sup>H NMR (400 MHz, CDCl<sub>3</sub>) and <sup>13</sup>C NMR (100 MHz, CDCl<sub>3</sub>) spectra of product 7ar

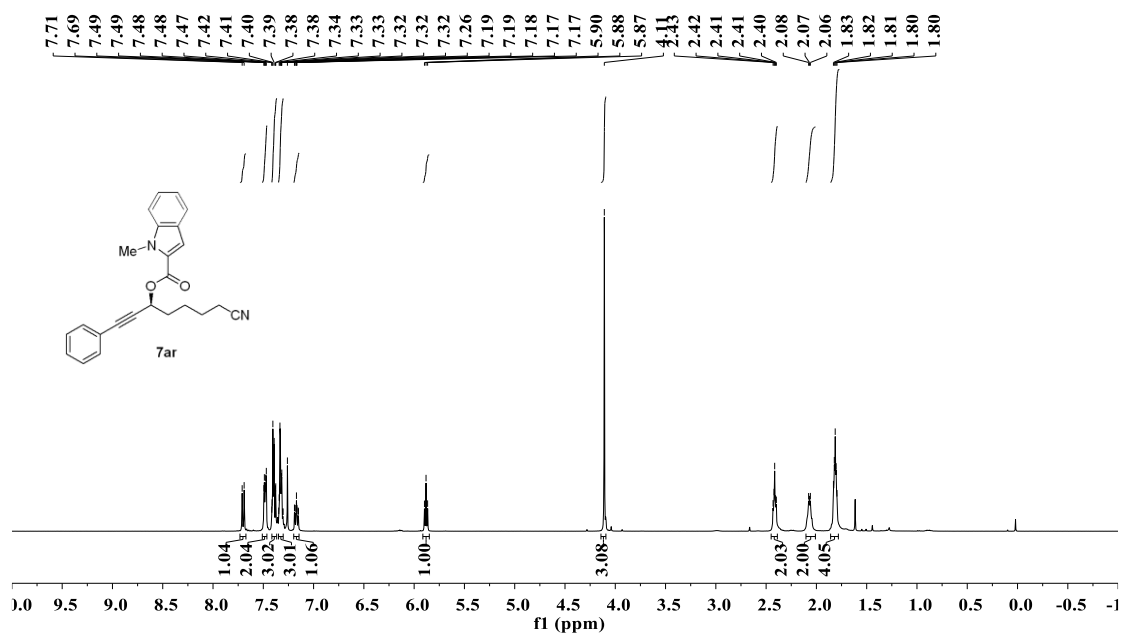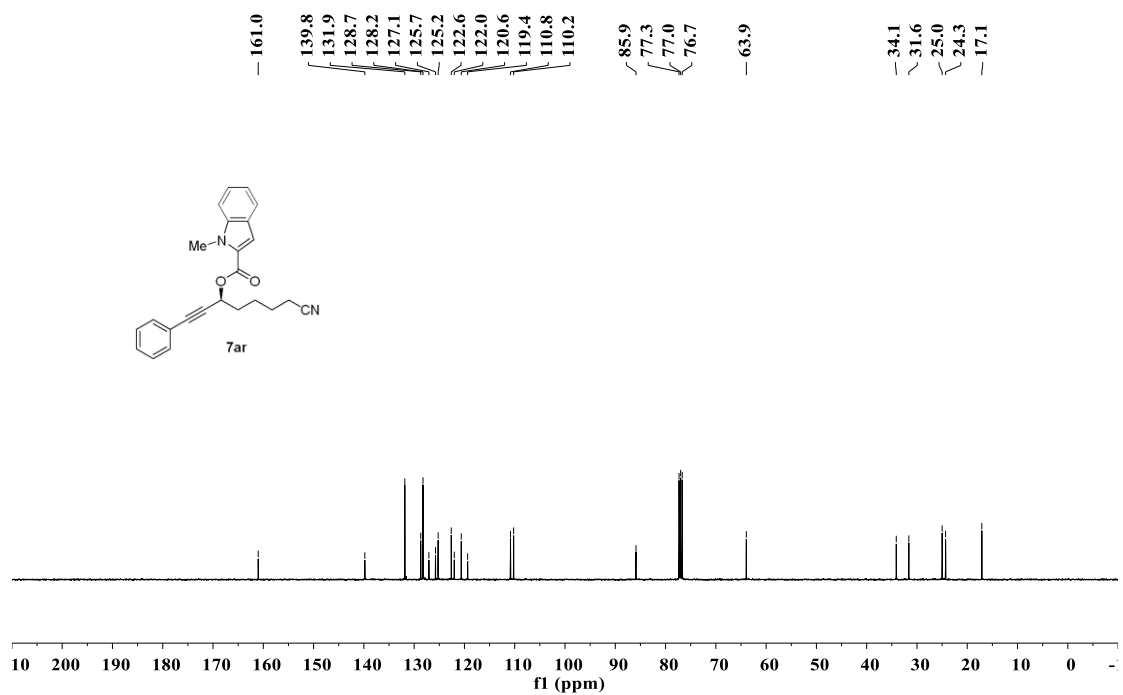

<sup>1</sup>H NMR (400 MHz, CDCl<sub>3</sub>) and <sup>13</sup>C NMR (100 MHz, CDCl<sub>3</sub>) spectra of product 7as

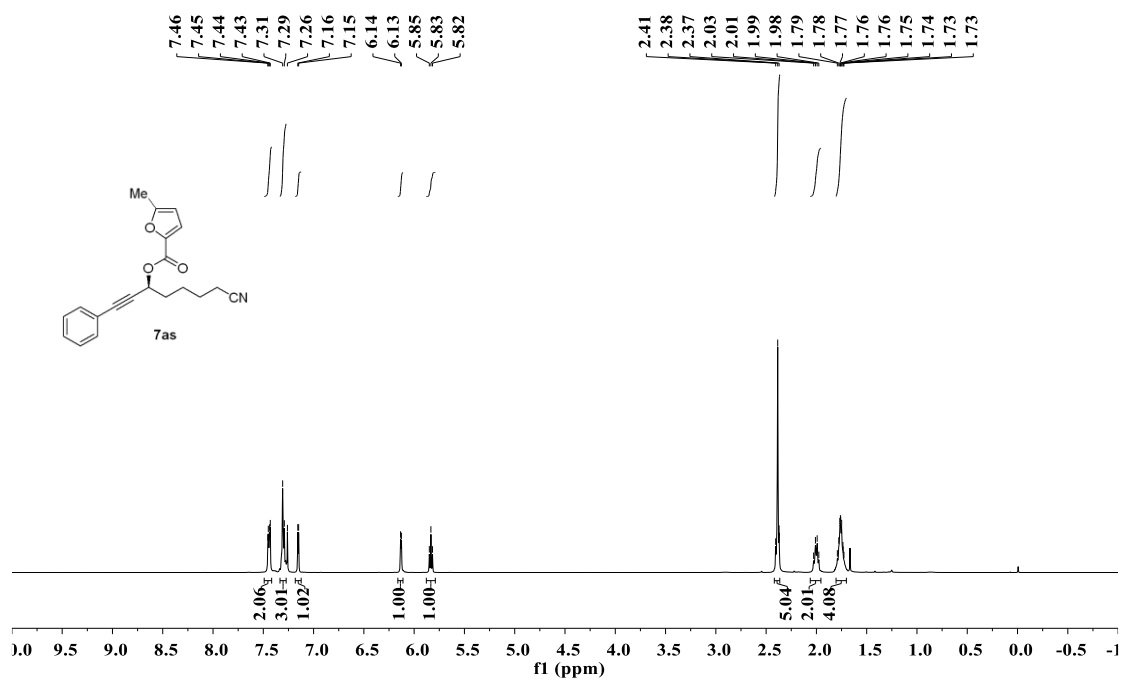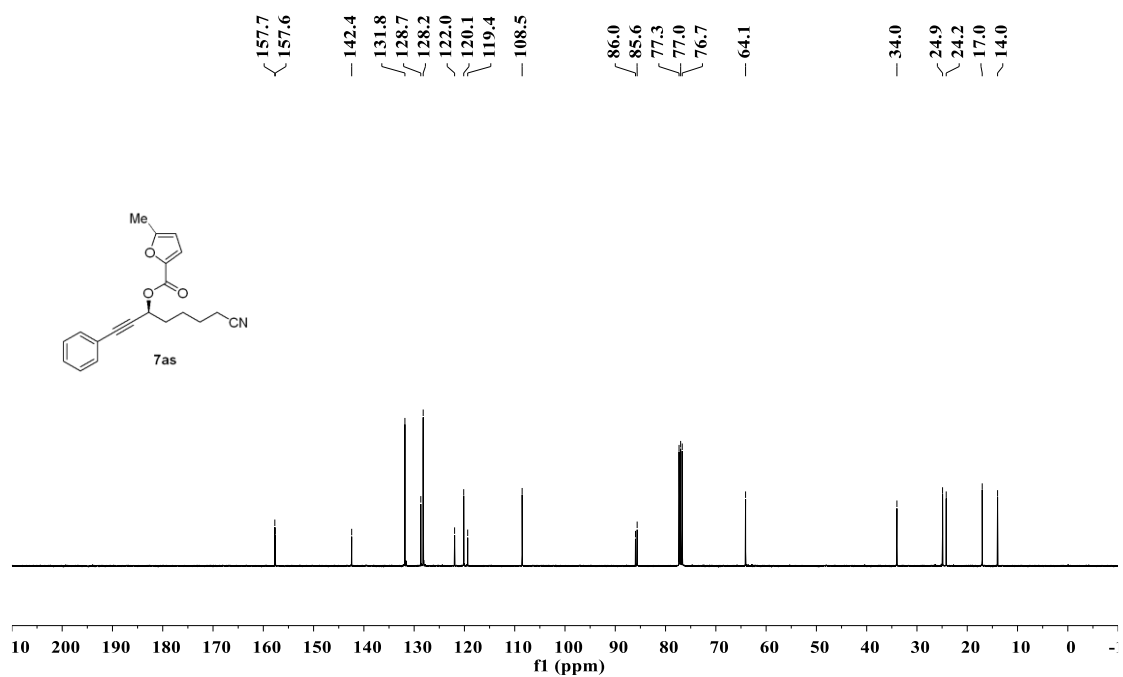

<sup>1</sup>H NMR (400 MHz, CDCl<sub>3</sub>) and <sup>13</sup>C NMR (100 MHz, CDCl<sub>3</sub>) spectra of product 7at

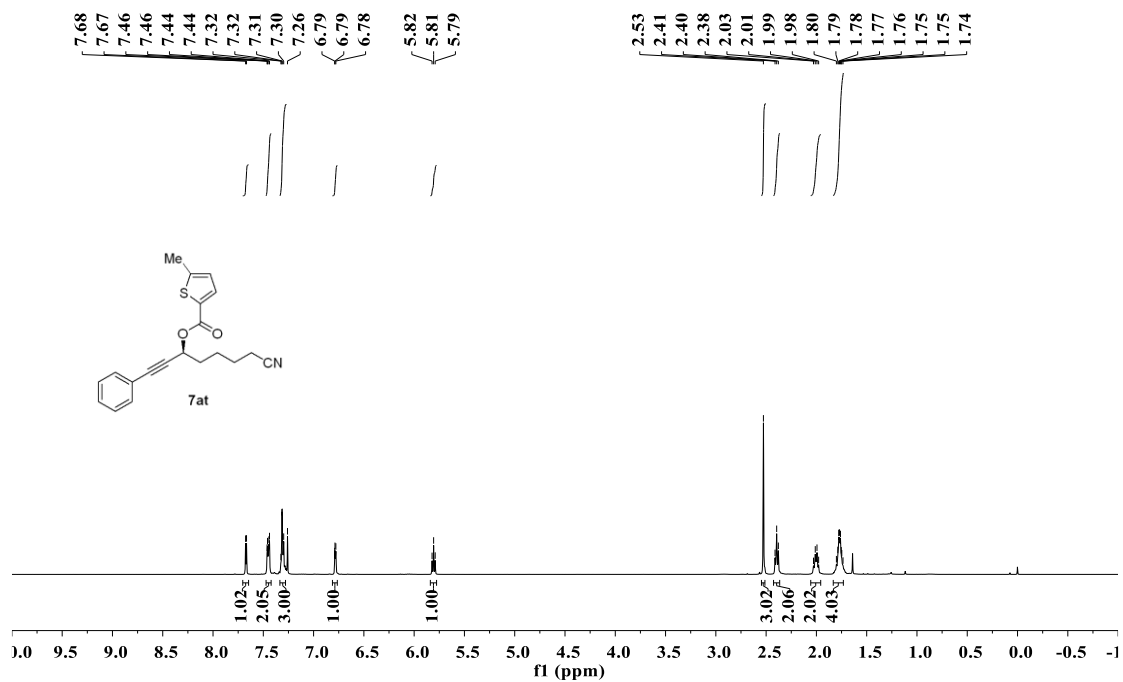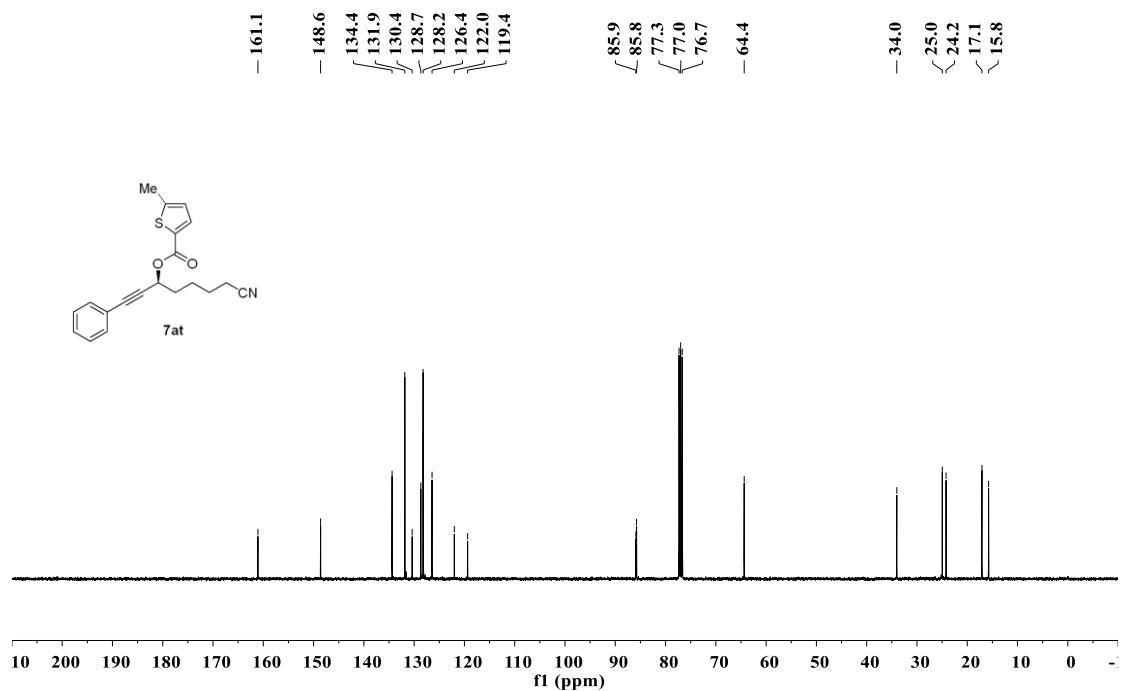

<sup>1</sup>H NMR (400 MHz, CDCl<sub>3</sub>) and <sup>13</sup>C NMR (100 MHz, CDCl<sub>3</sub>) spectra of product 8aa

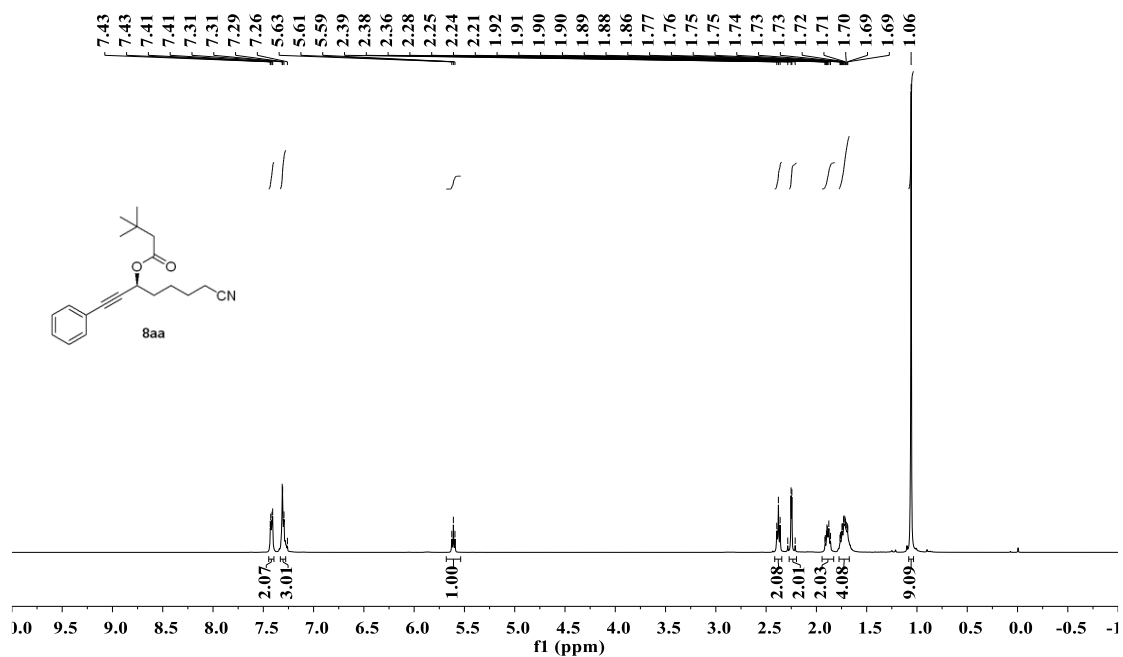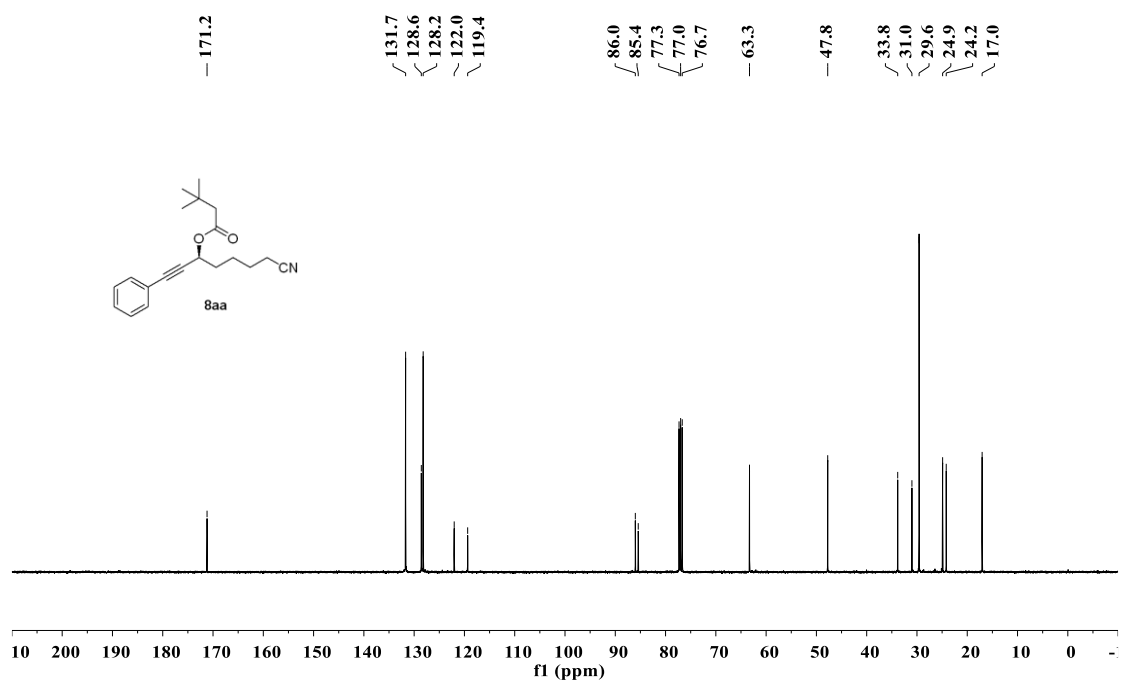

<sup>1</sup>H NMR (400 MHz, CDCl<sub>3</sub>) and <sup>13</sup>C NMR (100 MHz, CDCl<sub>3</sub>) spectra of product 8ab

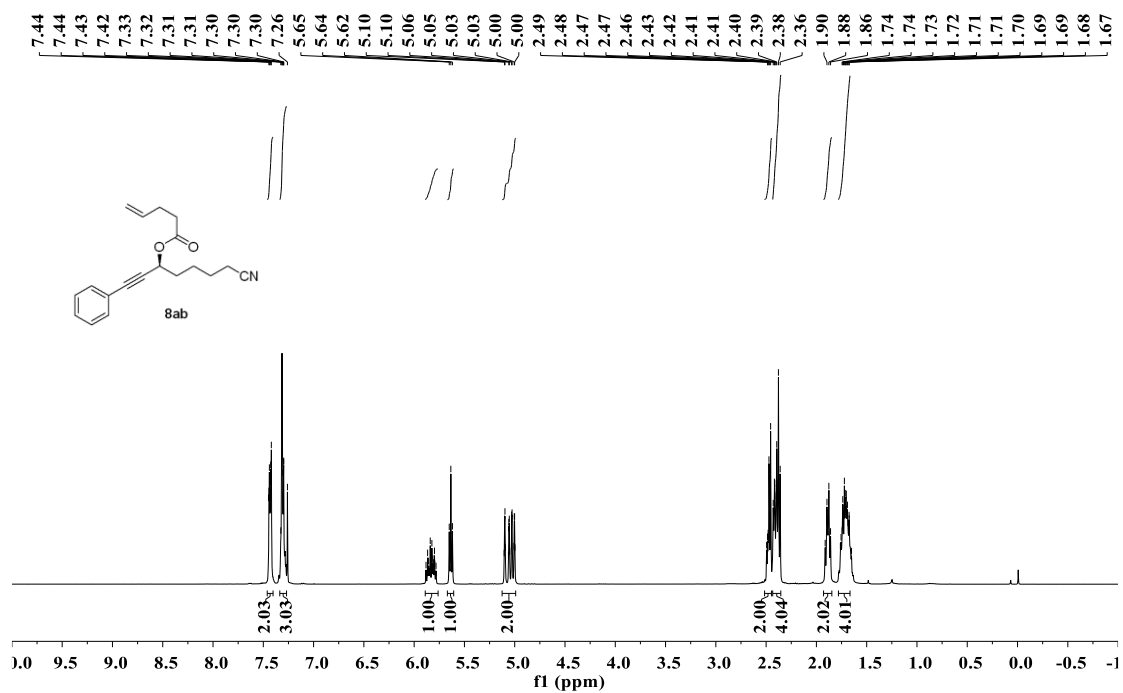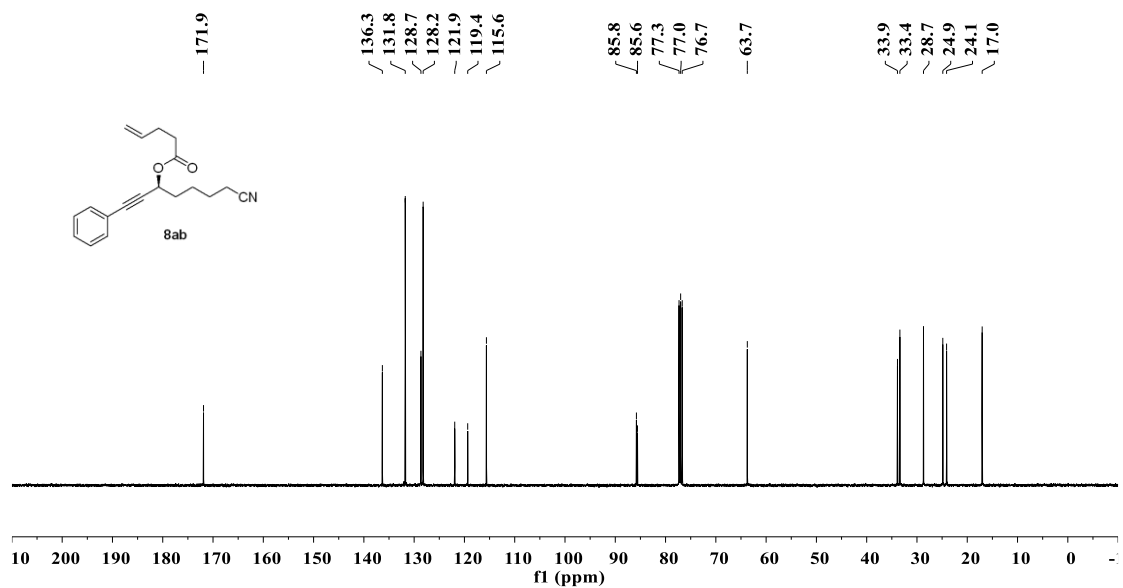

<sup>1</sup>H NMR (400 MHz, CDCl<sub>3</sub>) and <sup>13</sup>C NMR (100 MHz, CDCl<sub>3</sub>) spectra of product 8ac

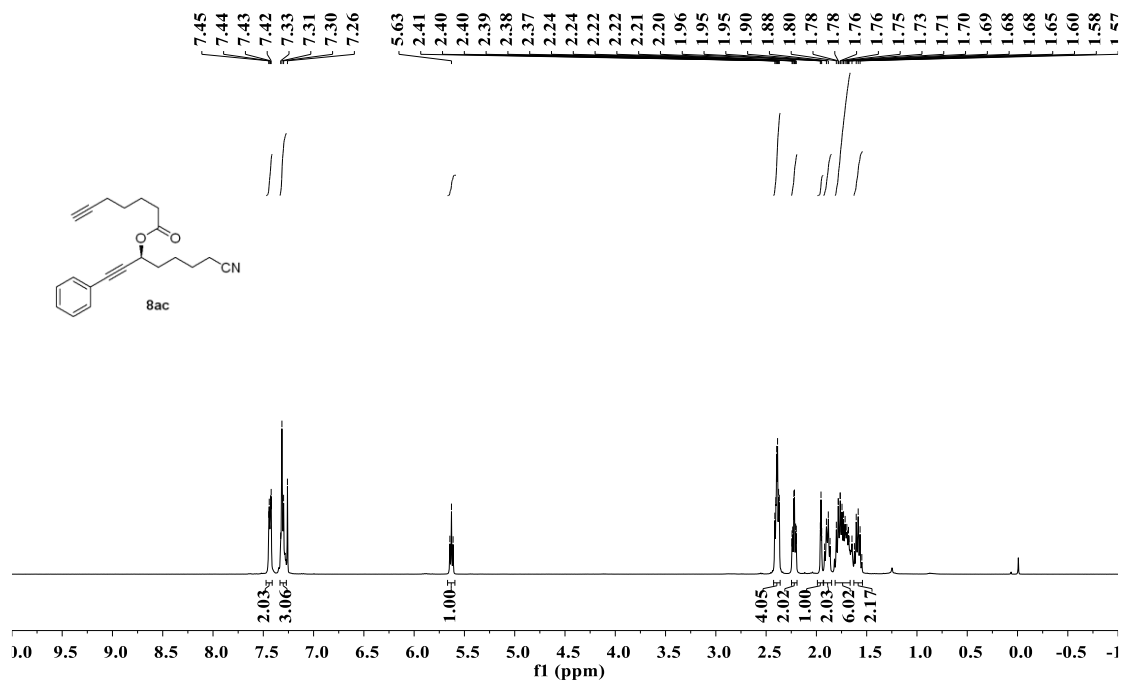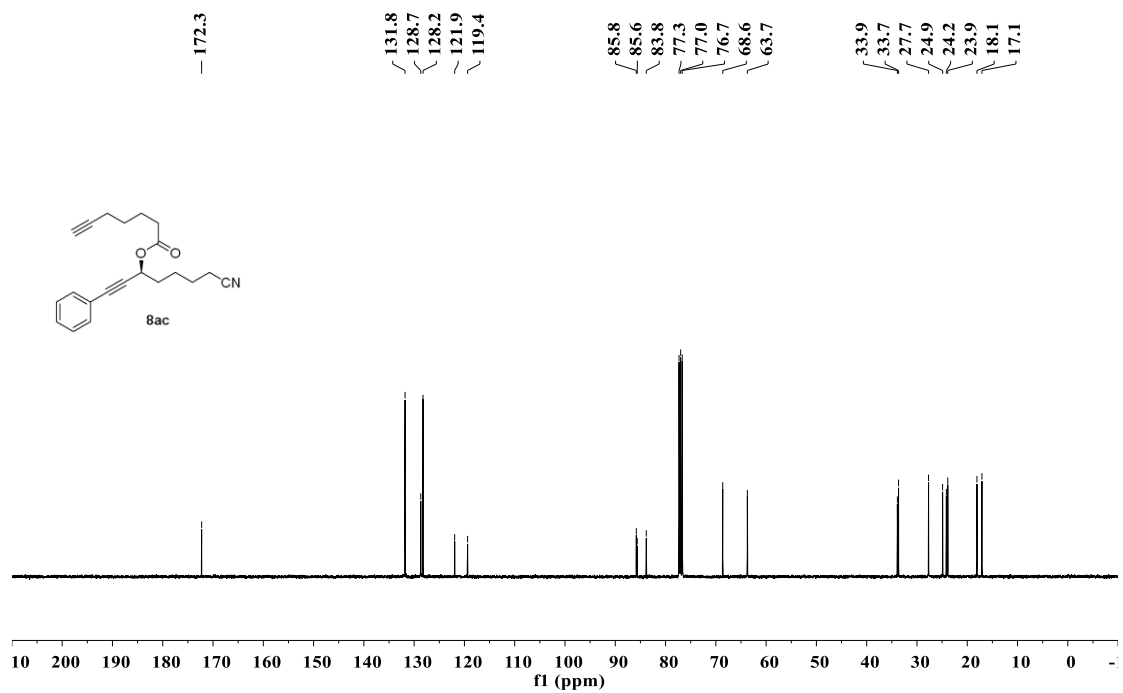

<sup>1</sup>H NMR (400 MHz, CDCl<sub>3</sub>) and <sup>13</sup>C NMR (100 MHz, CDCl<sub>3</sub>) spectra of product 8ad

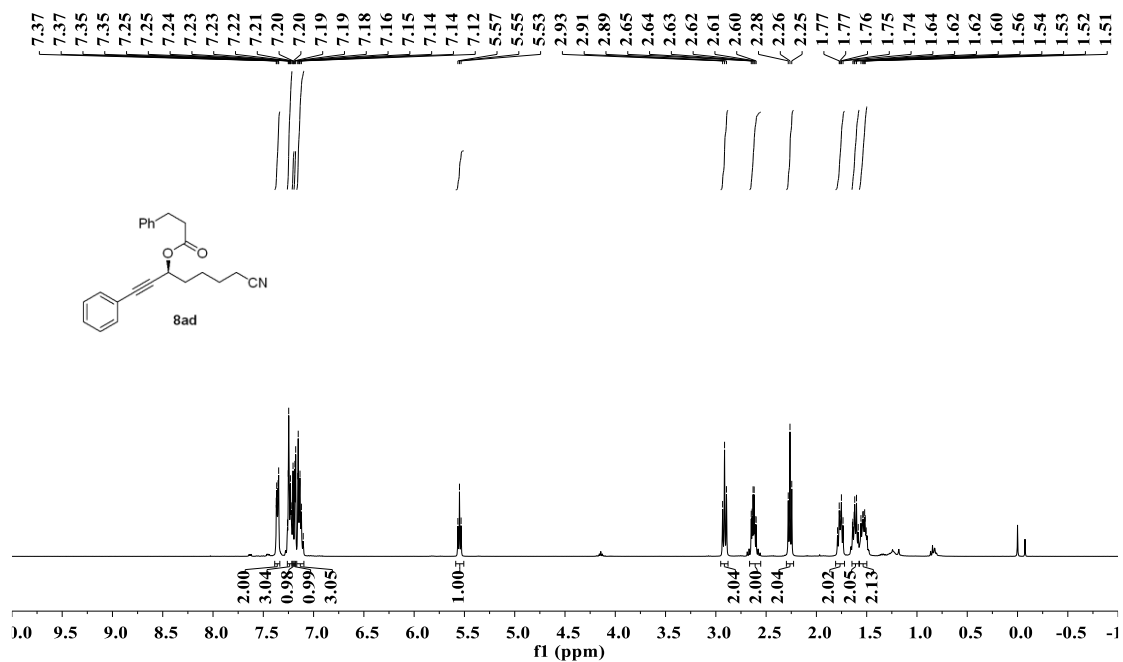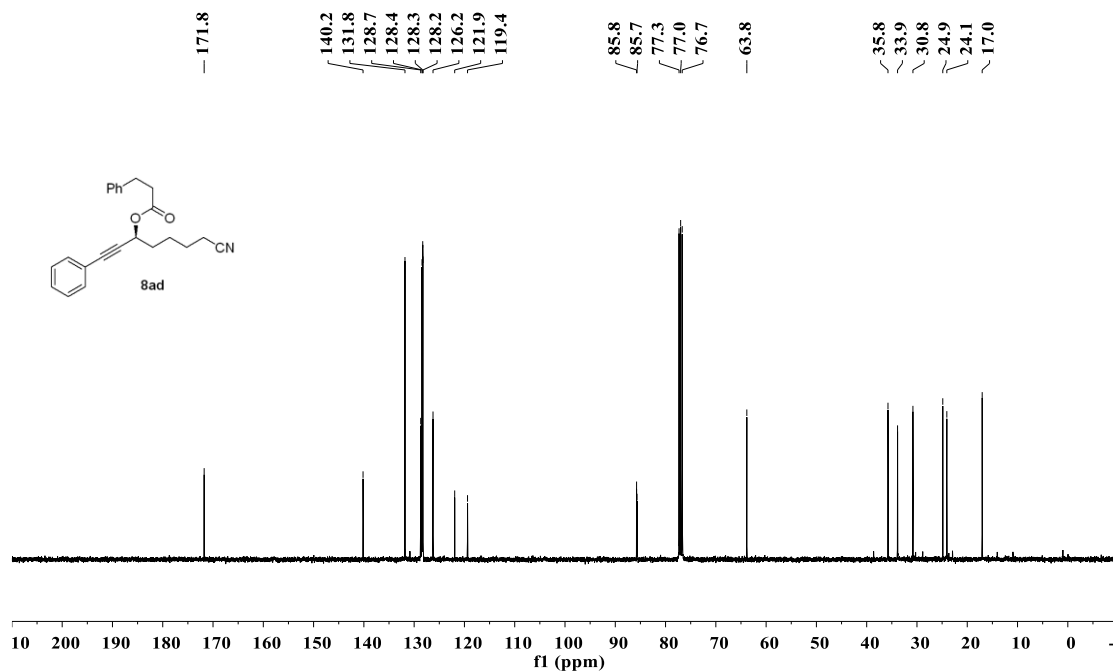



<sup>1</sup>H NMR (400 MHz, CDCl<sub>3</sub>) and <sup>13</sup>C NMR (100 MHz, CDCl<sub>3</sub>) spectra of product 8ae

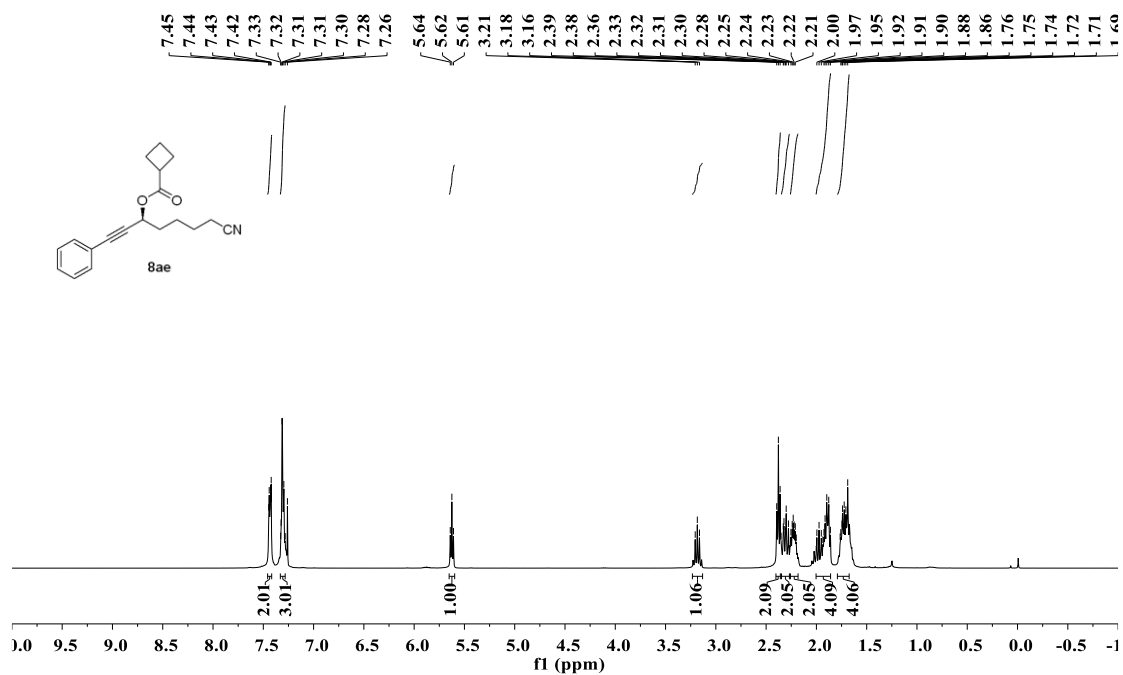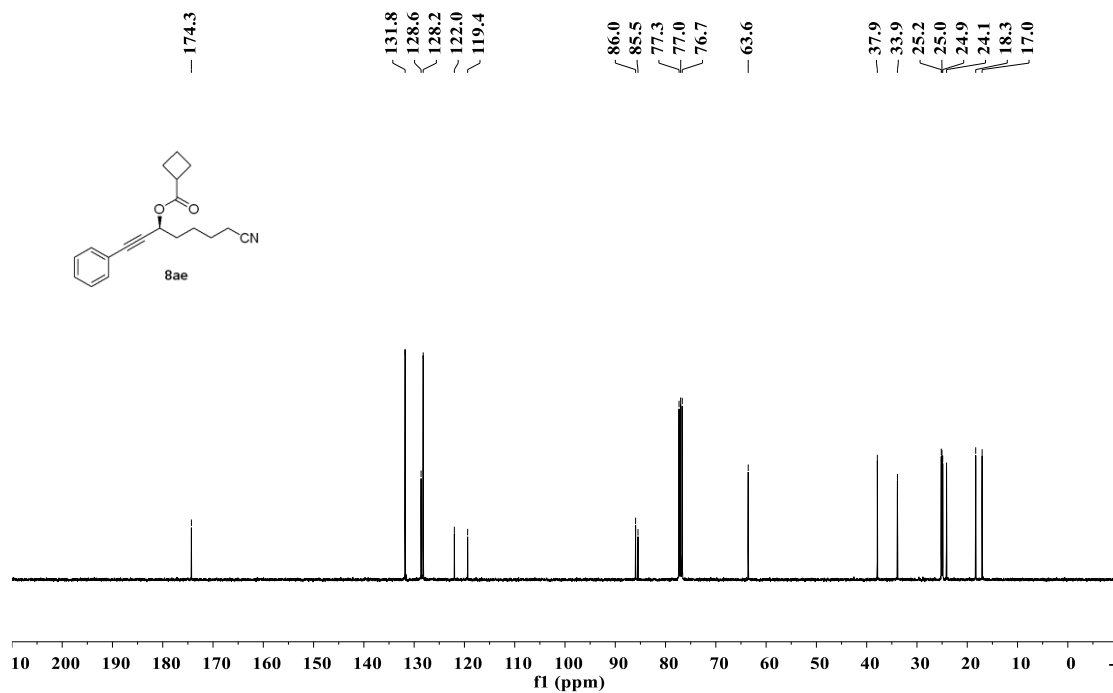

<sup>1</sup>H NMR (400 MHz, CDCl<sub>3</sub>) and <sup>13</sup>C NMR (100 MHz, CDCl<sub>3</sub>) spectra of product 8af

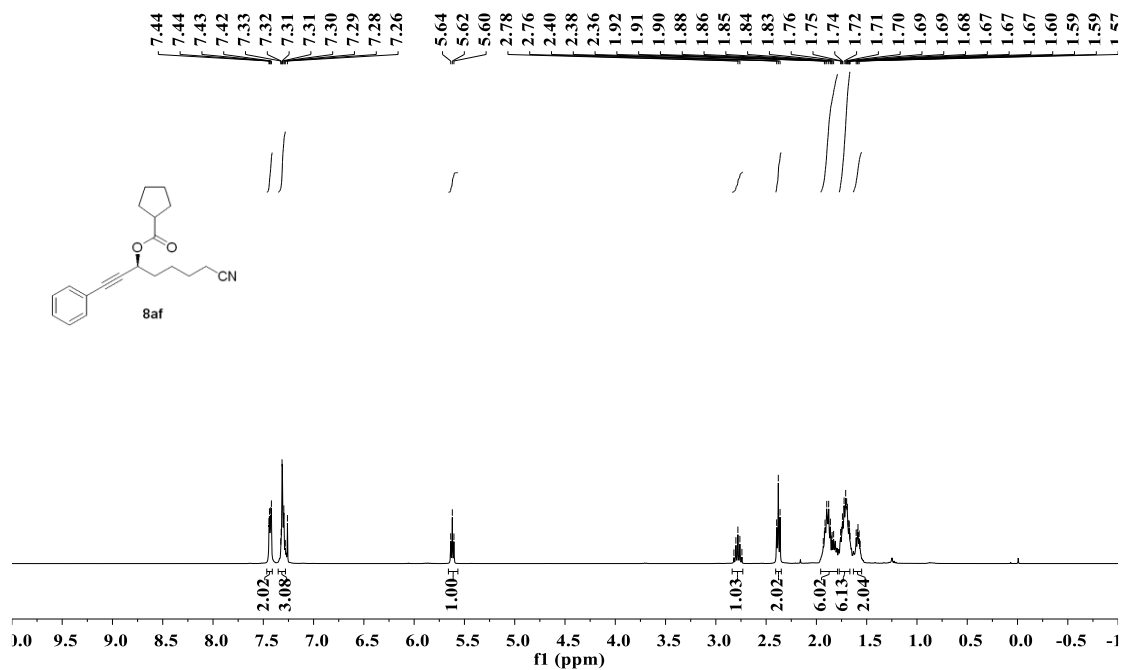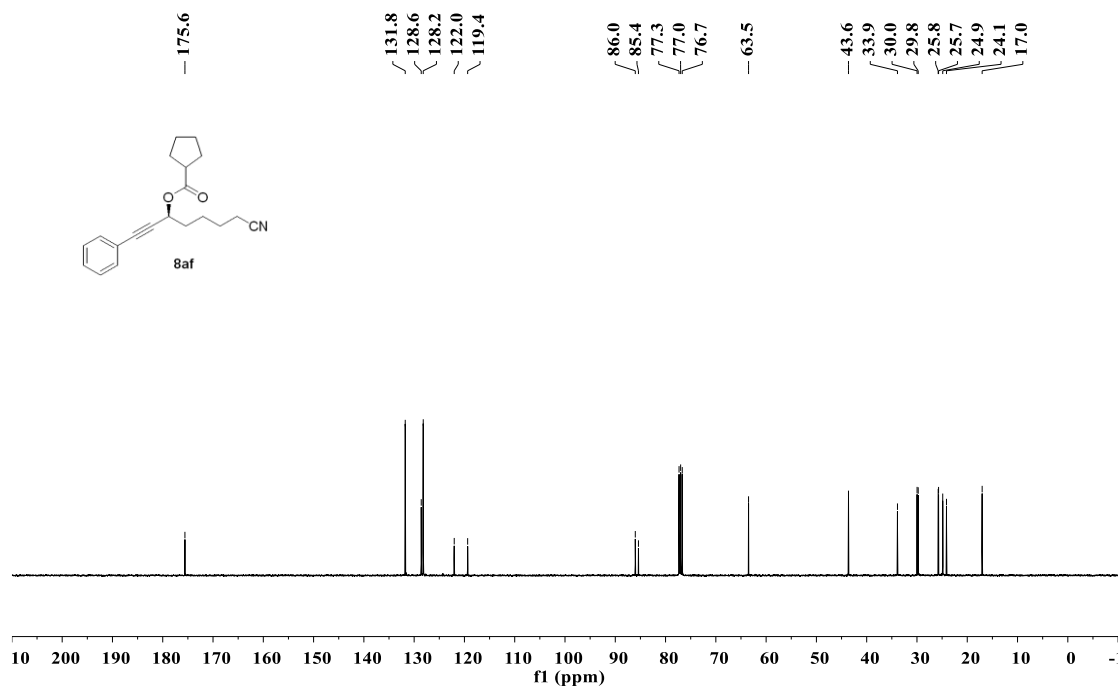

<sup>1</sup>H NMR (400 MHz, CDCl<sub>3</sub>) and <sup>13</sup>C NMR (100 MHz, CDCl<sub>3</sub>) spectra of product 8ag

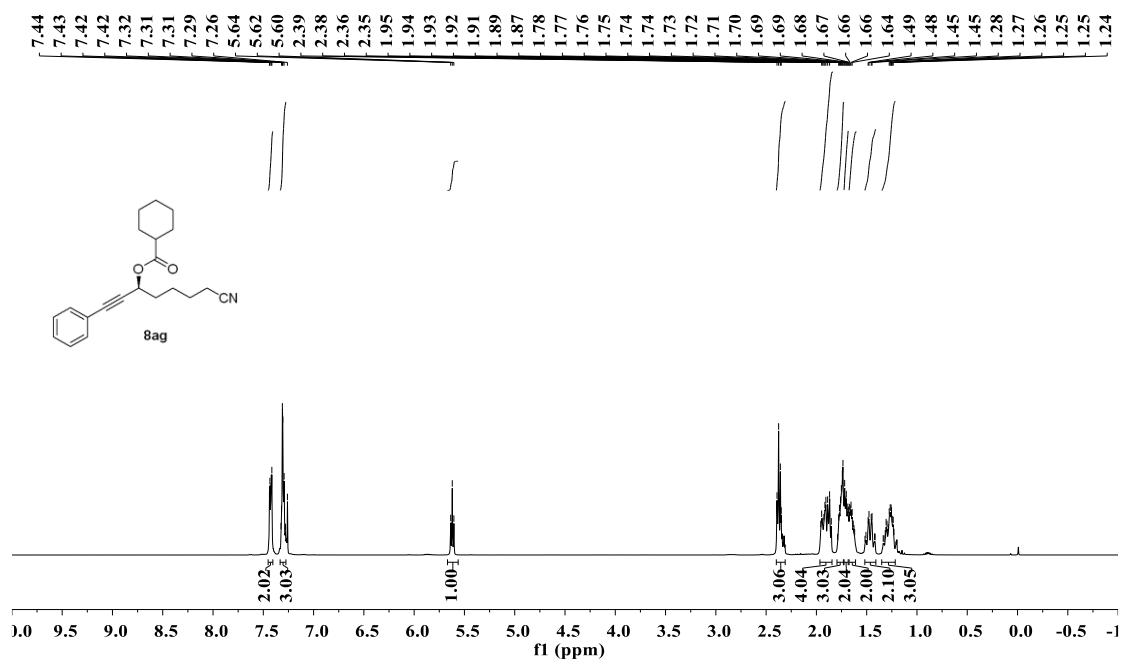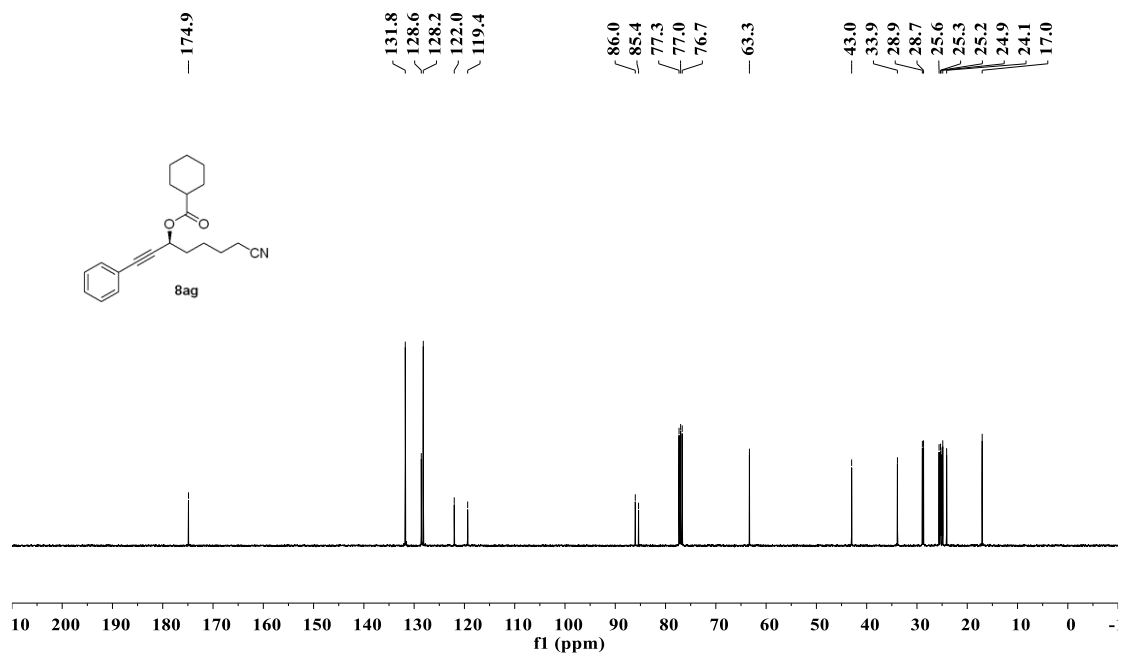

<sup>1</sup>H NMR (400 MHz, CDCl<sub>3</sub>) and <sup>13</sup>C NMR (100 MHz, CDCl<sub>3</sub>) spectra of product 8ah

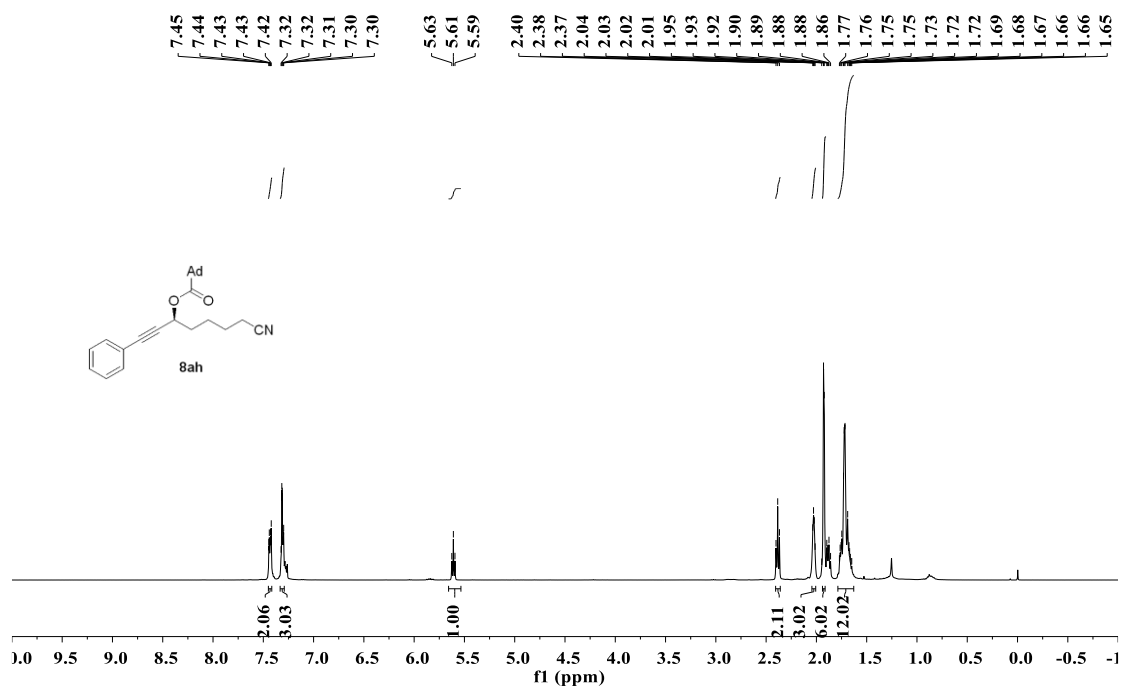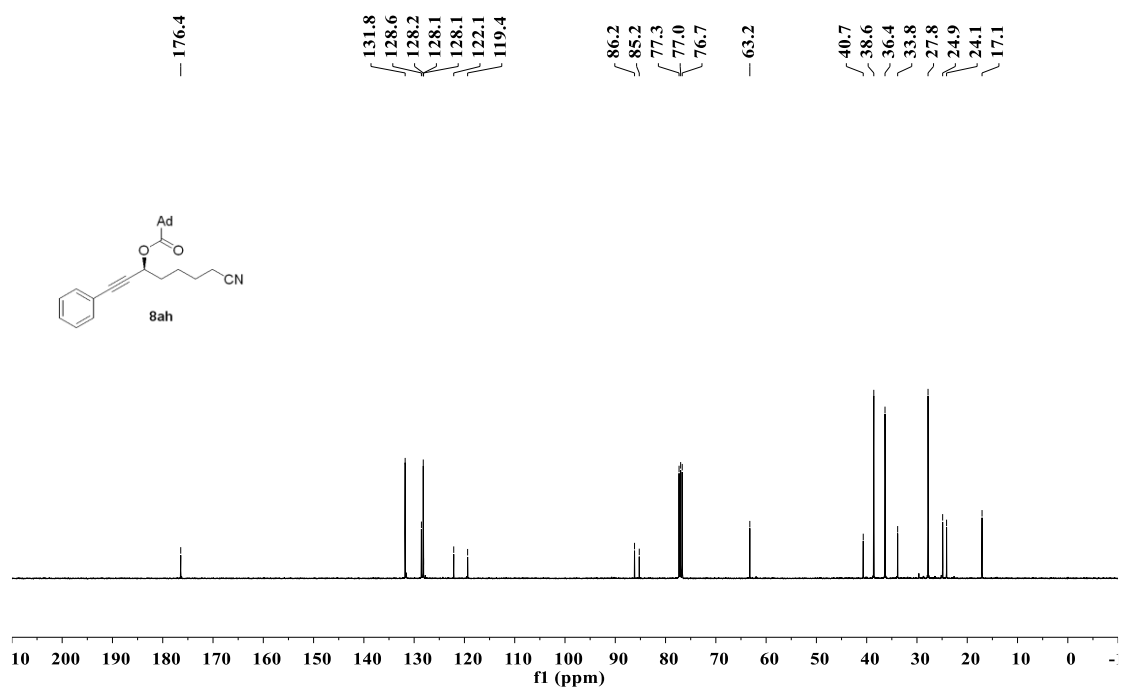

<sup>1</sup>H NMR (400 MHz, CDCl<sub>3</sub>) and <sup>13</sup>C NMR (100 MHz, CDCl<sub>3</sub>) spectra of product 8ai

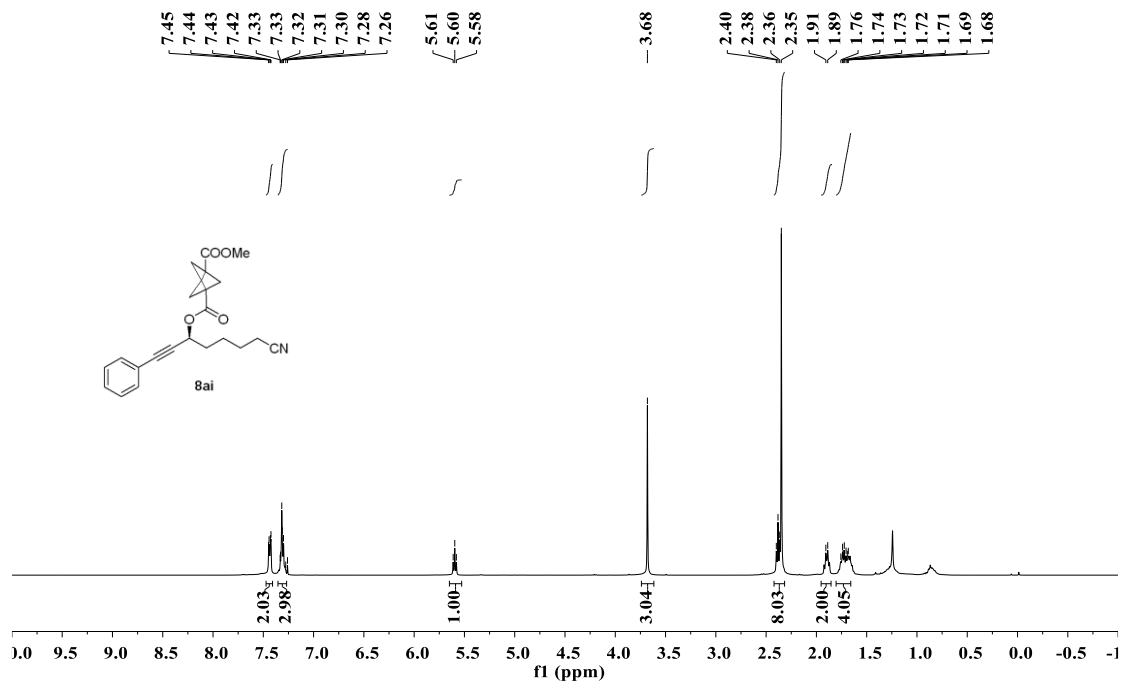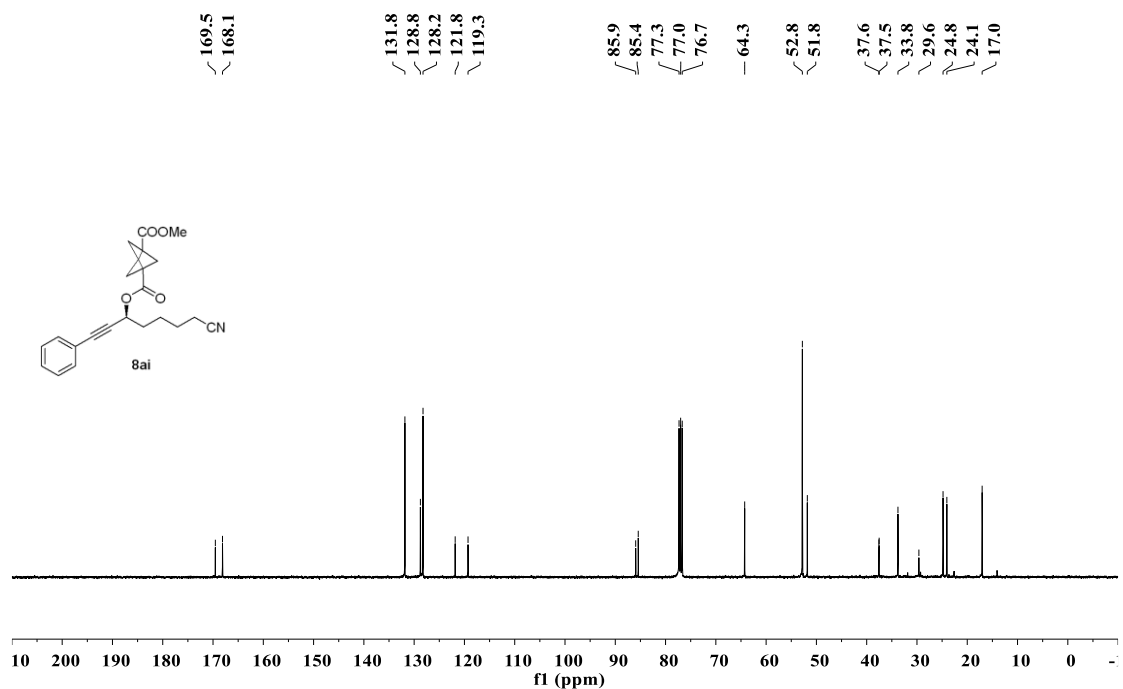

<sup>1</sup>H NMR (400 MHz, CDCl<sub>3</sub>) and <sup>13</sup>C NMR (100 MHz, CDCl<sub>3</sub>) spectra of product 8aj

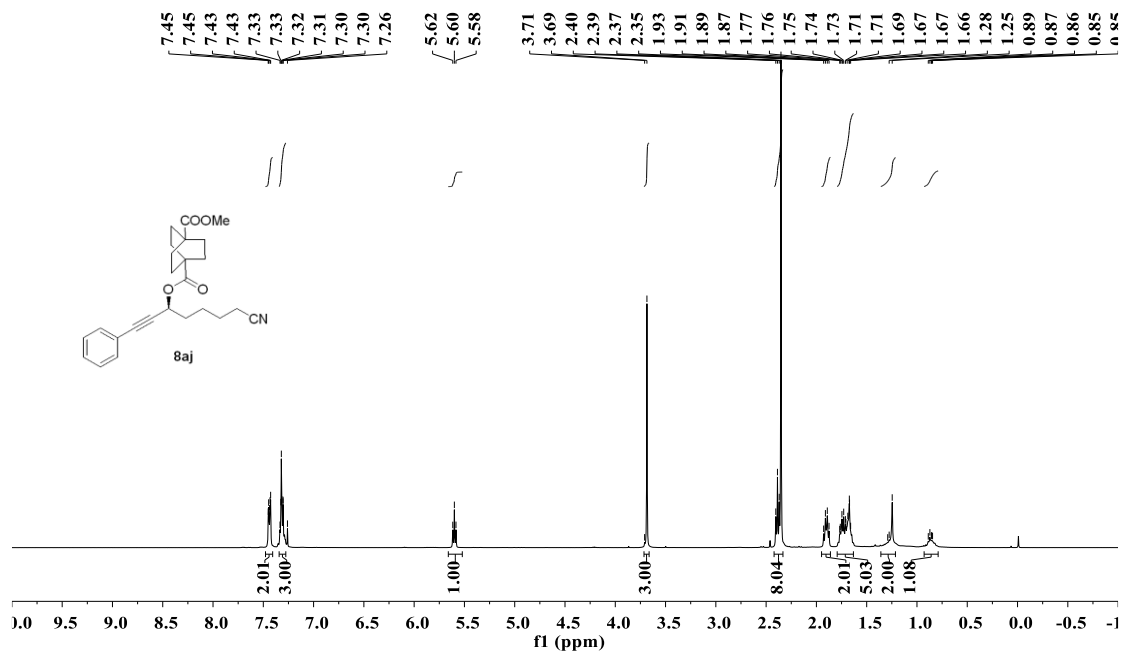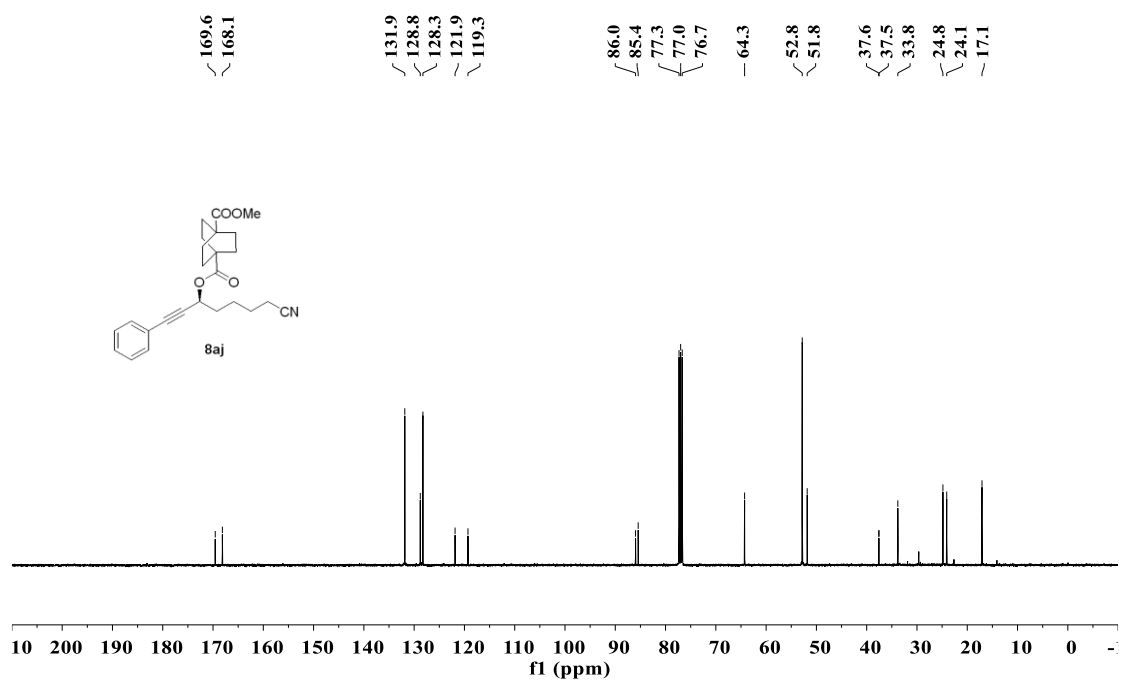

<sup>1</sup>H NMR (400 MHz, CDCl<sub>3</sub>) and <sup>13</sup>C NMR (100 MHz, CDCl<sub>3</sub>) spectra of product 8ak

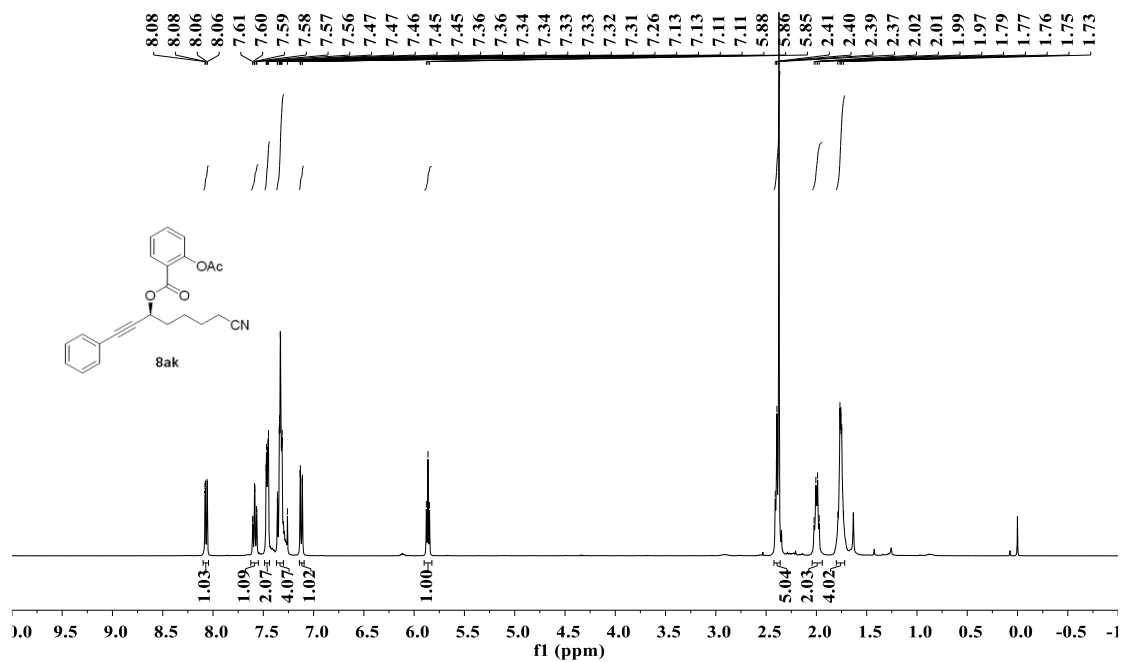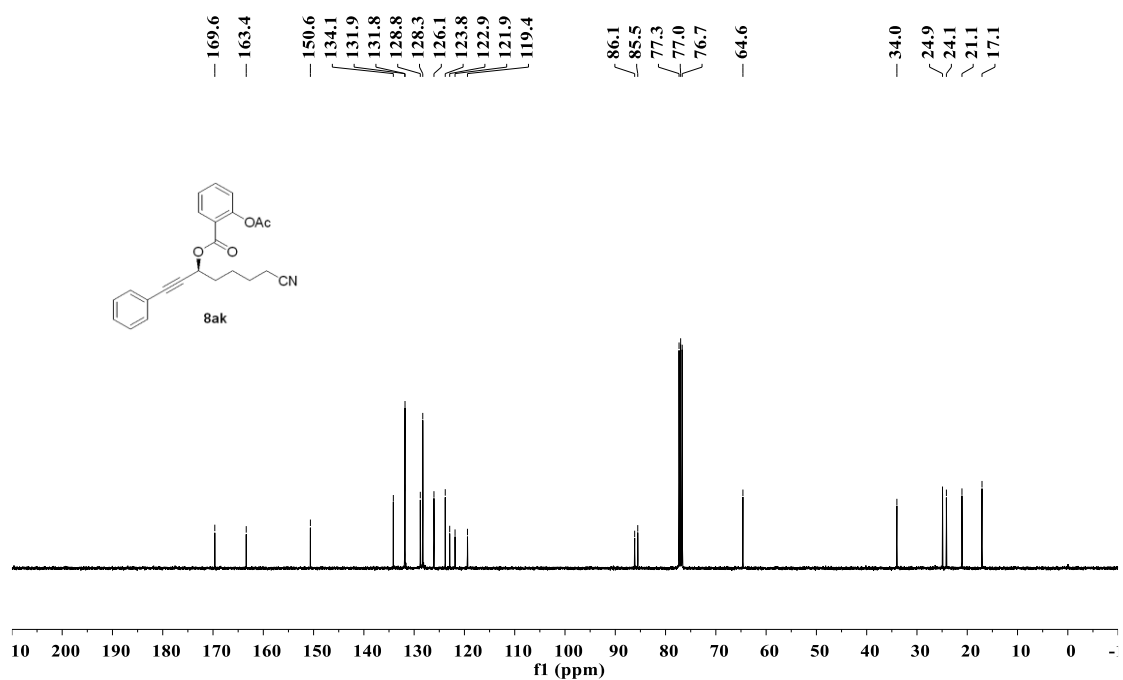

<sup>1</sup>H NMR (400 MHz, CDCl<sub>3</sub>) and <sup>13</sup>C NMR (100 MHz, CDCl<sub>3</sub>) spectra of product 8al

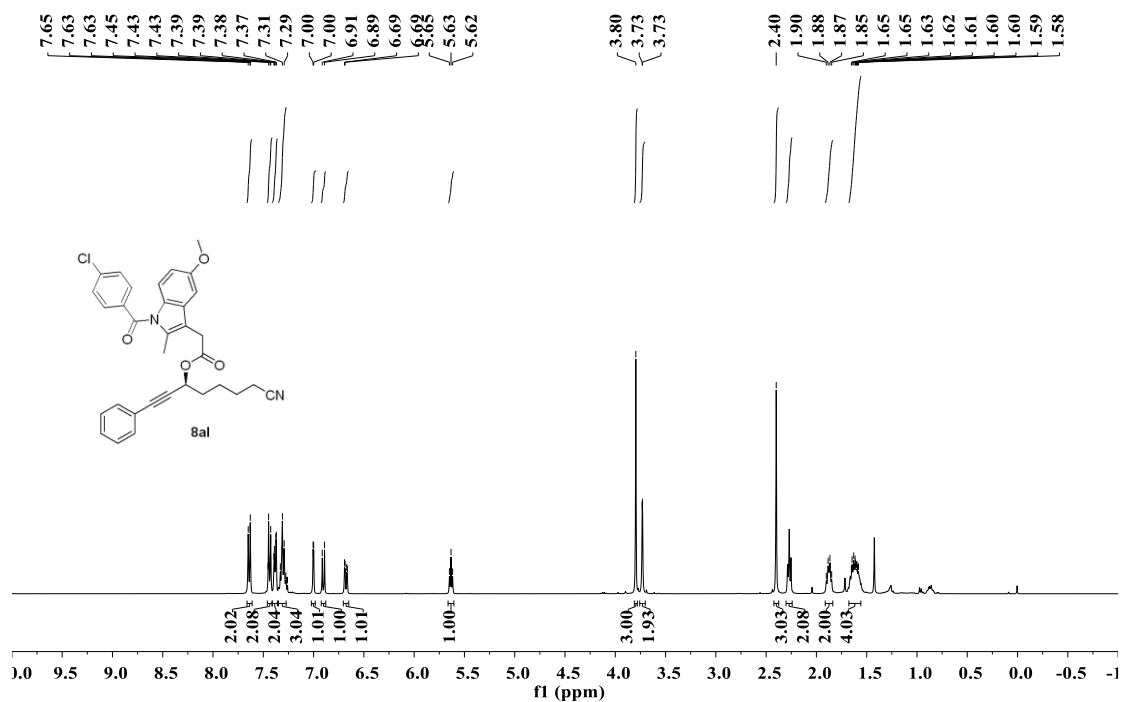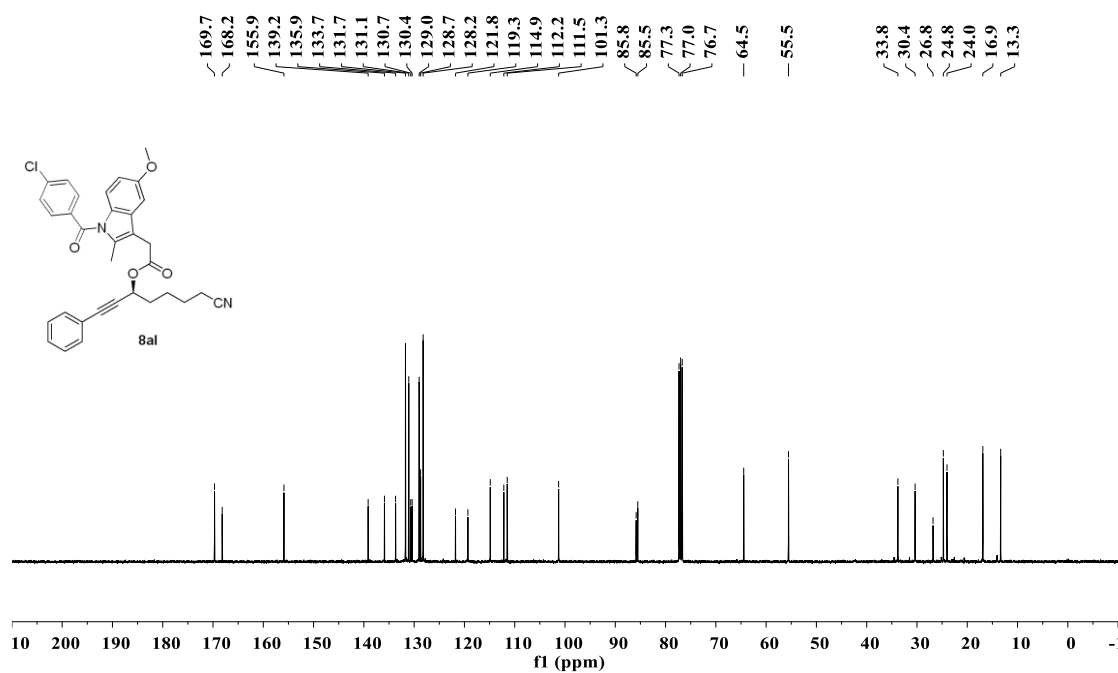



<sup>1</sup>H NMR (400 MHz, CDCl<sub>3</sub>) and <sup>13</sup>C NMR (100 MHz, CDCl<sub>3</sub>) spectra of product 8am

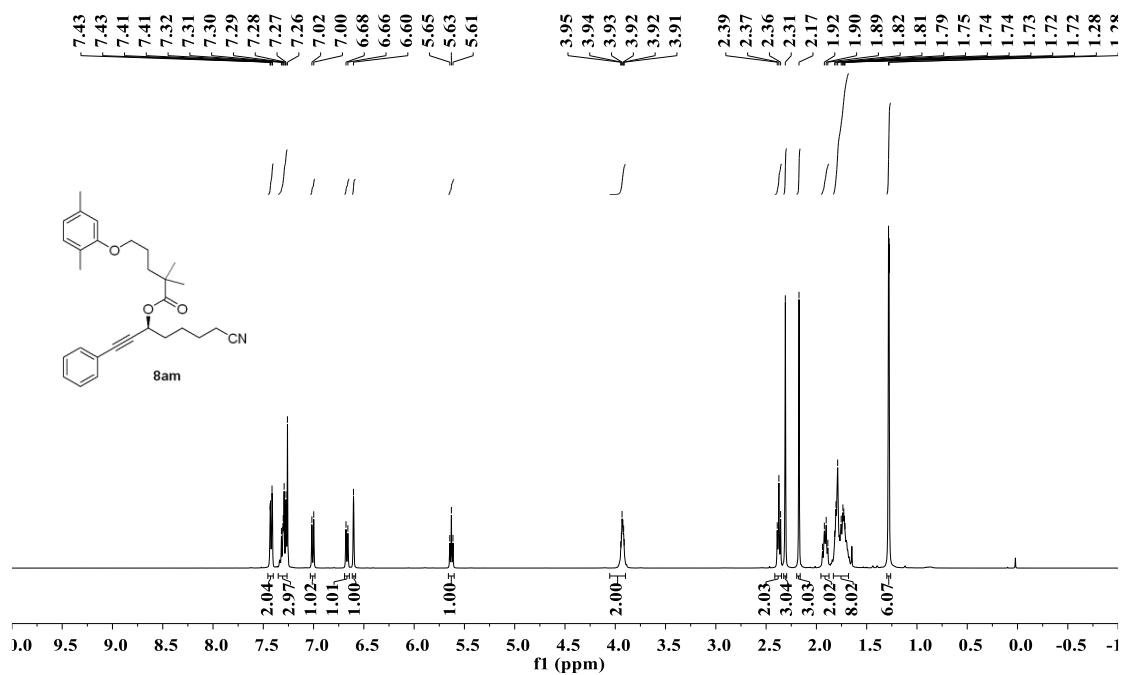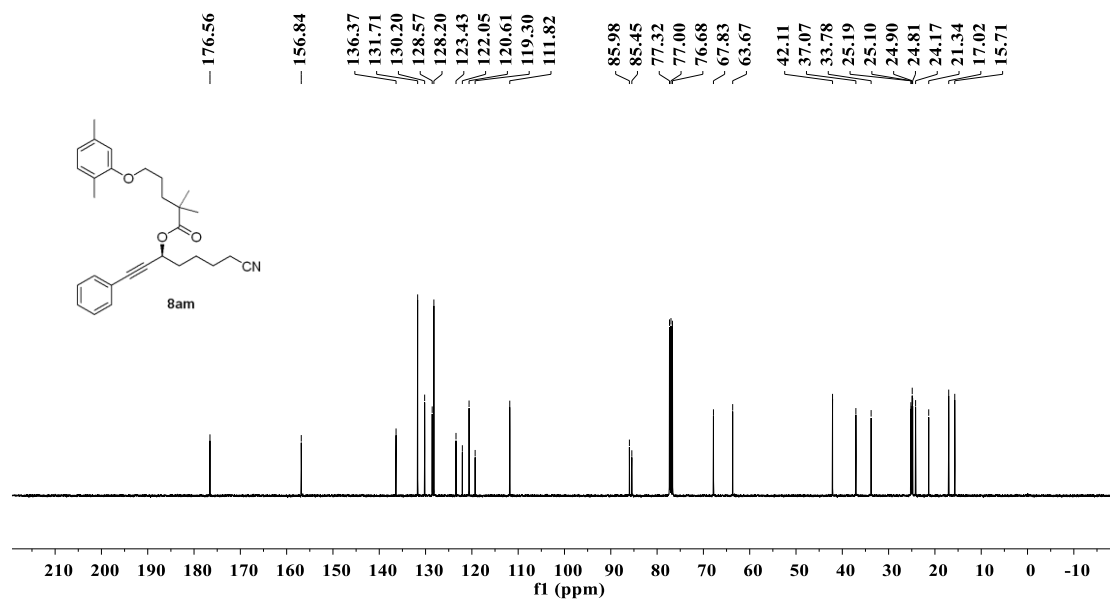

## 9. Copies of HPLC chromatograms

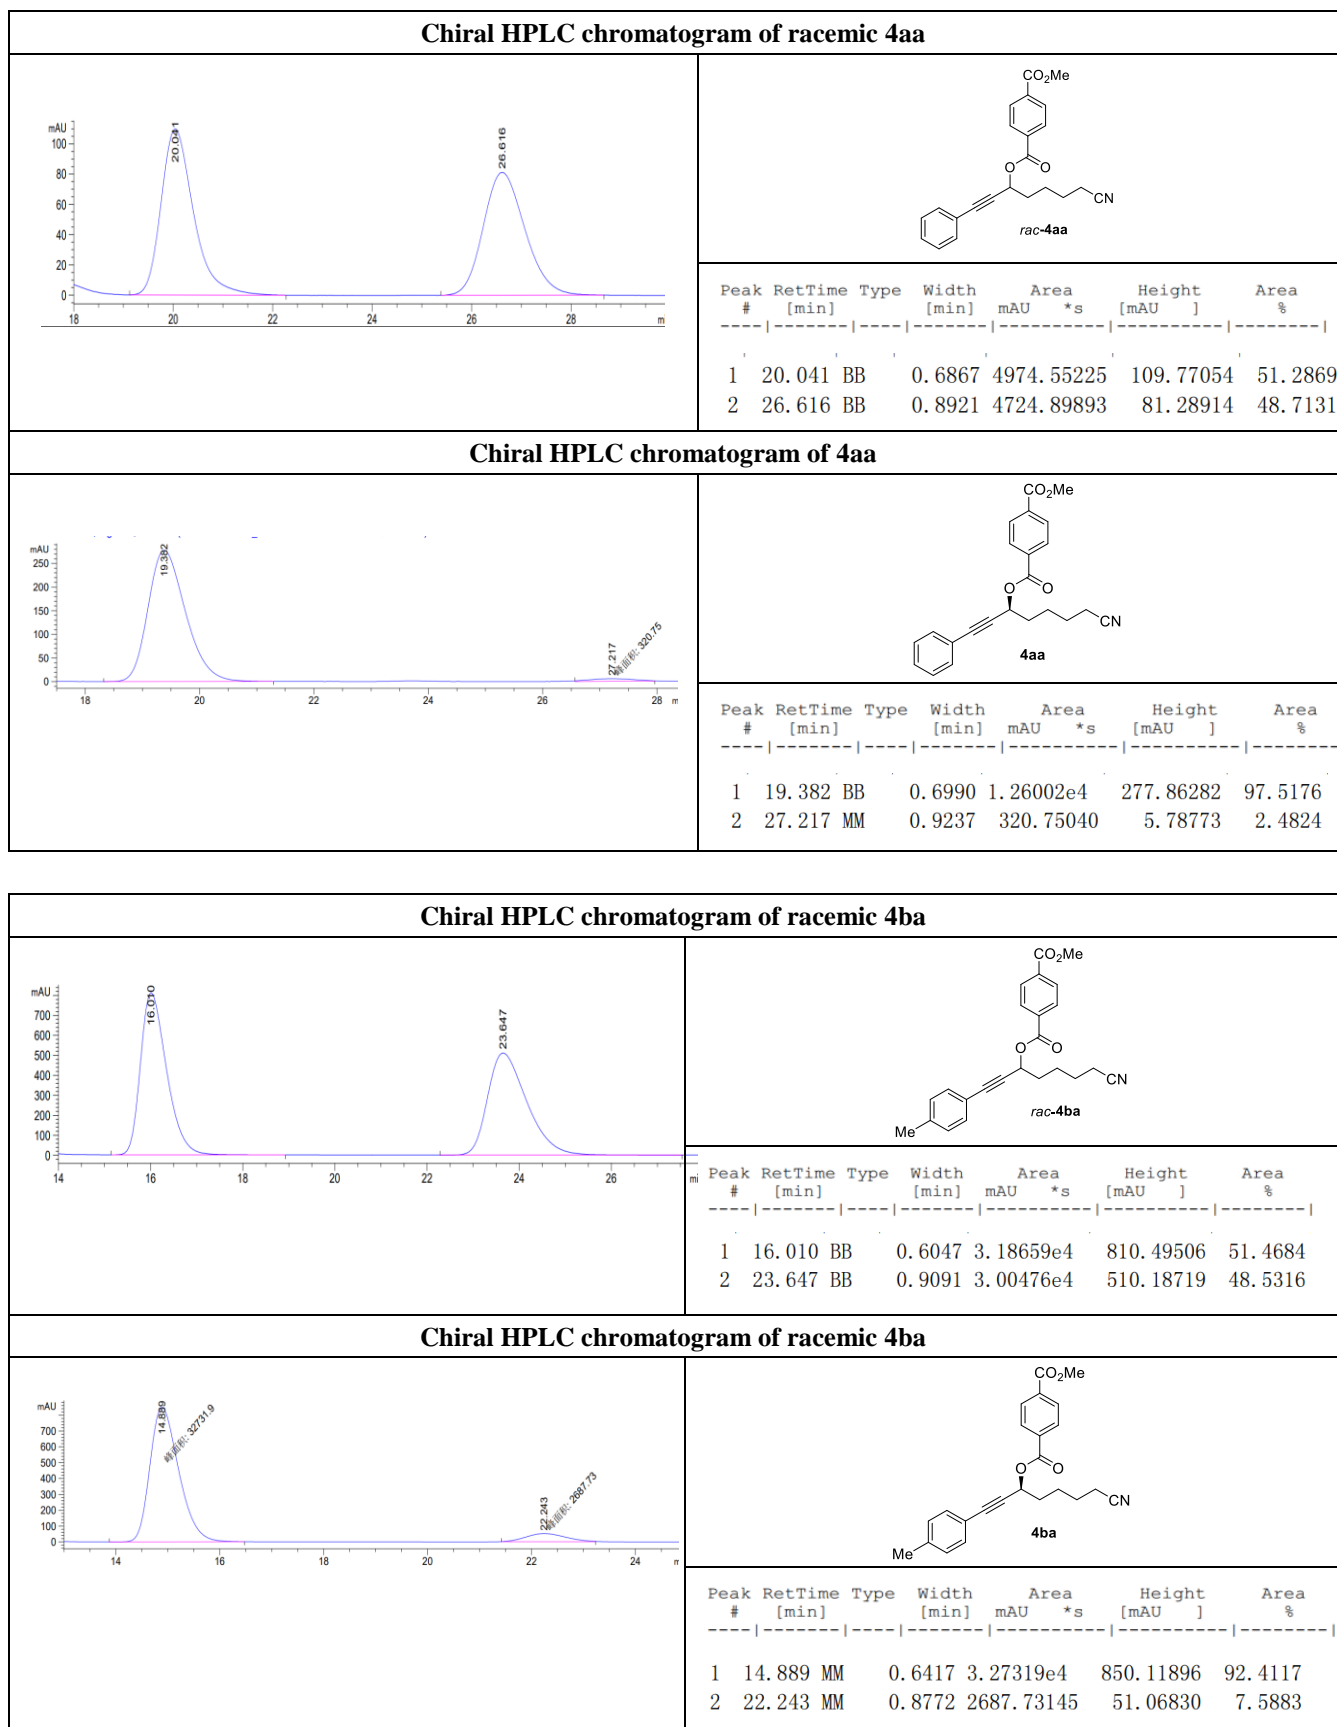

### Chiral HPLC chromatogram of racemic 4ca

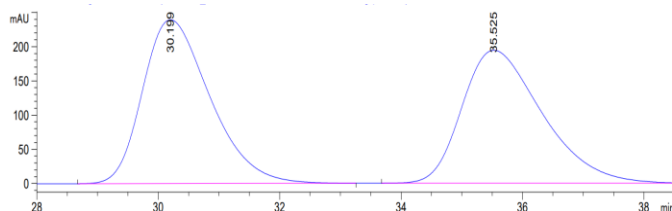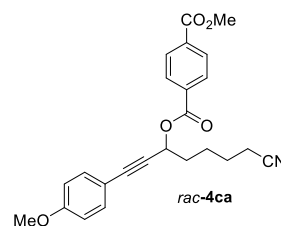

| Peak # | RetTime [min] | Type | Width [min] | Area mAU *s | Height [mAU] | Area %  |
|--------|---------------|------|-------------|-------------|--------------|---------|
| 1      | 30.199        | BB   | 1.1747      | 1.84832e4   | 239.40404    | 50.8421 |
| 2      | 35.525        | BB   | 1.3588      | 1.78709e4   | 194.34470    | 49.1579 |

### Chiral HPLC chromatogram of 4ca

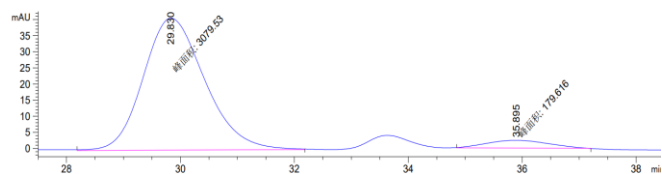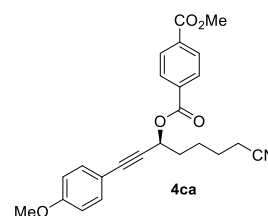

| Peak # | RetTime [min] | Type | Width [min] | Area mAU *s | Height [mAU] | Area %  |
|--------|---------------|------|-------------|-------------|--------------|---------|
| 1      | 29.830        | MM   | 1.2522      | 3079.53418  | 40.98910     | 94.4889 |
| 2      | 35.895        | MM   | 1.2545      | 179.61600   | 2.38637      | 5.5111  |

### Chiral HPLC chromatogram of racemic 4da

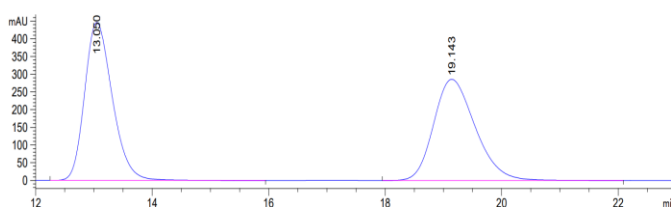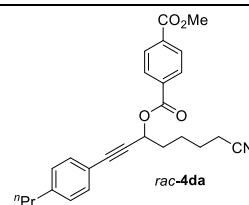

| Peak # | RetTime [min] | Type | Width [min] | Area mAU *s | Height [mAU] | Area %  |
|--------|---------------|------|-------------|-------------|--------------|---------|
| 1      | 13.050        | BB   | 0.5078      | 1.46754e4   | 446.09244    | 50.9722 |
| 2      | 19.143        | BB   | 0.7650      | 1.41156e4   | 285.42587    | 49.0278 |

### Chiral HPLC chromatogram of 4da

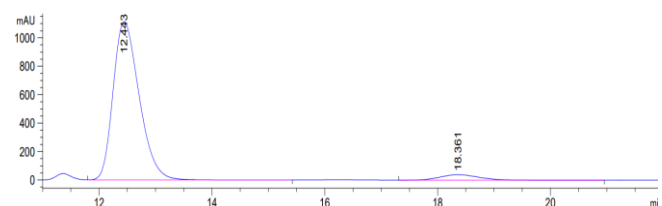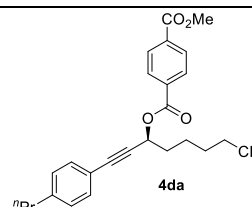

| Peak # | RetTime [min] | Type | Width [min] | Area mAU *s | Height [mAU] | Area %  |
|--------|---------------|------|-------------|-------------|--------------|---------|
| 1      | 12.443        | VB   | 0.4984      | 3.57641e4   | 1114.42578   | 95.1685 |
| 2      | 18.361        | BB   | 0.7429      | 1815.68286  | 37.76916     | 4.8315  |

### Chiral HPLC chromatogram of racemic 4ea

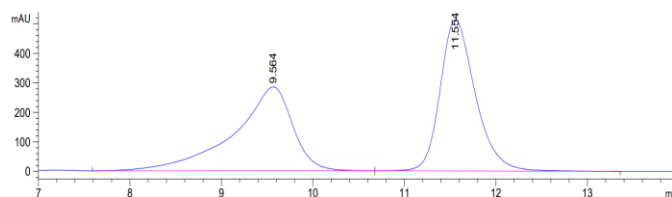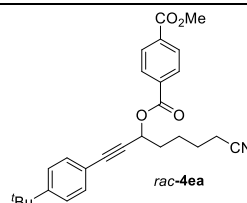

| Peak # | RetTime [min] | Type | Width [min] | Area mAU *s | Height [mAU] | Area %  |
|--------|---------------|------|-------------|-------------|--------------|---------|
| 1      | 9.564         | BB   | 0.6164      | 1.26737e4   | 284.11975    | 48.1496 |
| 2      | 11.554        | BB   | 0.4049      | 1.36478e4   | 512.19775    | 51.8504 |

### Chiral HPLC chromatogram of 4ea

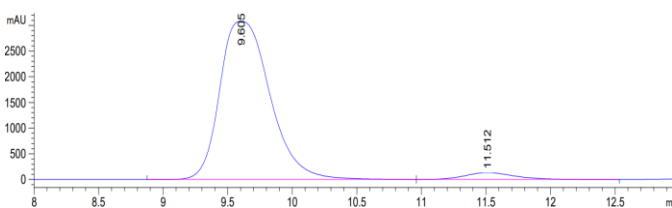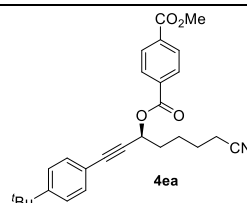

| Peak # | RetTime [min] | Type | Width [min] | Area mAU *s | Height [mAU] | Area %  |
|--------|---------------|------|-------------|-------------|--------------|---------|
| 1      | 9.605         | BV   | 0.4202      | 8.31102e4   | 3085.54541   | 95.9768 |
| 2      | 11.512        | VB   | 0.4076      | 3483.81567  | 130.42270    | 4.0232  |

### Chiral HPLC chromatogram of racemic 4fa

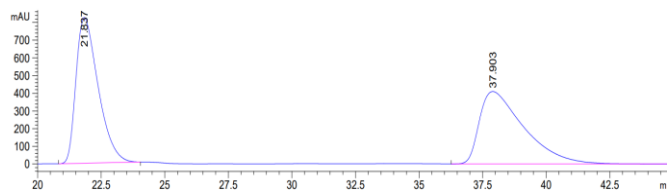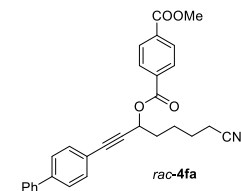

| Peak # | RetTime [min] | Type | Width [min] | Area mAU *s | Height [mAU] | Area %  |
|--------|---------------|------|-------------|-------------|--------------|---------|
| 1      | 21.837        | BB   | 0.9286      | 4.98662e4   | 823.32178    | 50.0940 |
| 2      | 37.903        | BB   | 1.7661      | 4.96791e4   | 409.29633    | 49.9060 |

### Chiral HPLC chromatogram of 4fa

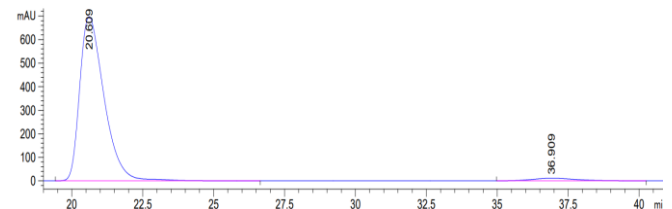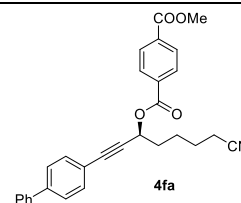

| Peak # | RetTime [min] | Type | Width [min] | Area mAU *s | Height [mAU] | Area %  |
|--------|---------------|------|-------------|-------------|--------------|---------|
| 1      | 20.609        | BB   | 0.9235      | 4.14188e4   | 696.81696    | 97.2989 |
| 2      | 36.909        | BB   | 1.2859      | 1149.82227  | 10.51407     | 2.7011  |

### Chiral HPLC chromatogram of racemic 4ga

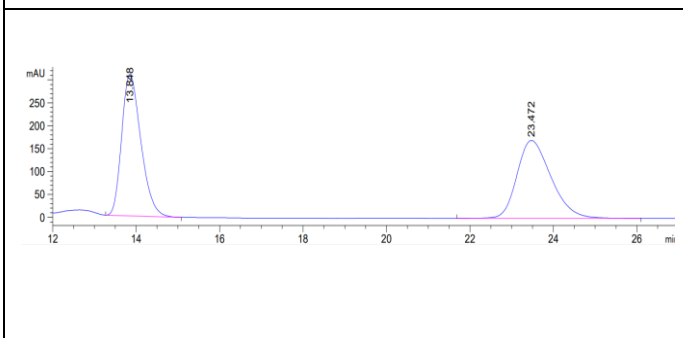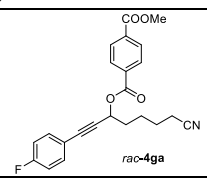

| Peak # | RetTime [min] | Type | Width [min] | Area mAU *s | Height [mAU] | Area %  |
|--------|---------------|------|-------------|-------------|--------------|---------|
| 1      | 13.848        | BB   | 0.4945      | 9876.67969  | 309.30194    | 50.7889 |
| 2      | 23.472        | BB   | 0.8638      | 9569.84668  | 169.73198    | 49.2111 |

### Chiral HPLC chromatogram of 4ga

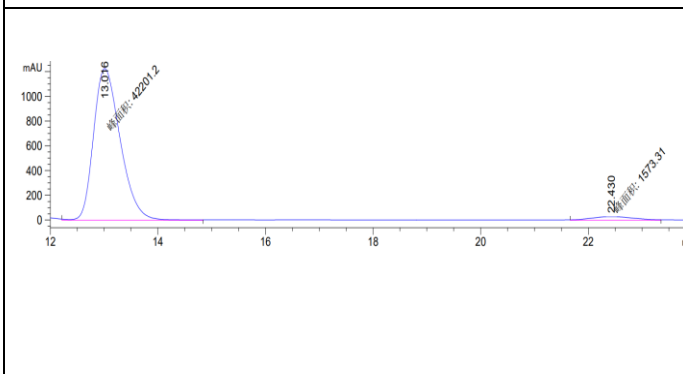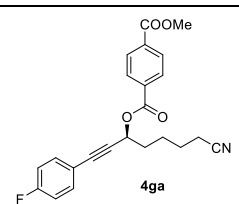

| Peak # | RetTime [min] | Type | Width [min] | Area mAU *s | Height [mAU] | Area %  |
|--------|---------------|------|-------------|-------------|--------------|---------|
| 1      | 13.016        | MM   | 0.5736      | 4.22012e4   | 1226.16785   | 96.4059 |
| 2      | 22.430        | MM   | 0.9172      | 1573.30579  | 28.58913     | 3.5941  |

### Chiral HPLC chromatogram of racemic 4ha

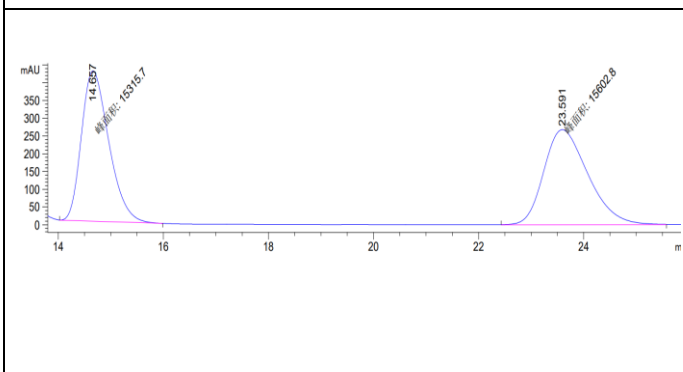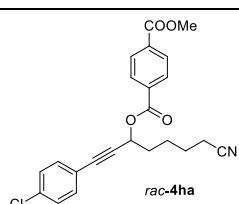

| Peak # | RetTime [min] | Type | Width [min] | Area mAU *s | Height [mAU] | Area %  |
|--------|---------------|------|-------------|-------------|--------------|---------|
| 1      | 14.657        | MM   | 0.6029      | 1.53157e4   | 423.39148    | 49.5357 |
| 2      | 23.591        | MM   | 0.9722      | 1.56028e4   | 267.49545    | 50.4643 |

### Chiral HPLC chromatogram of 4ha

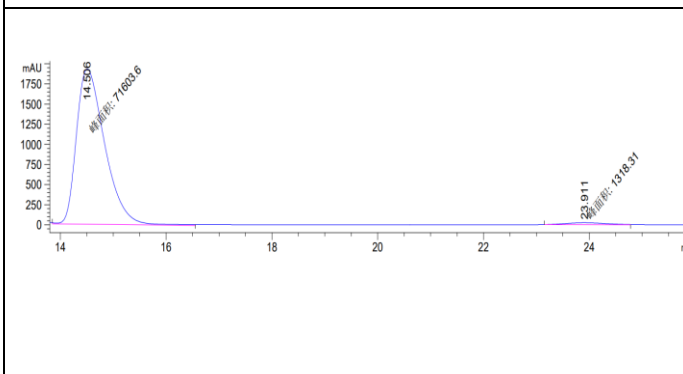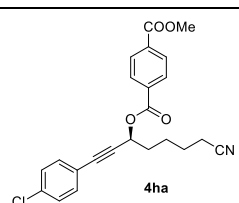

| Peak # | RetTime [min] | Type | Width [min] | Area mAU *s | Height [mAU] | Area %  |
|--------|---------------|------|-------------|-------------|--------------|---------|
| 1      | 14.506        | MM   | 0.6184      | 7.16036e4   | 1929.66187   | 98.1922 |
| 2      | 23.911        | MM   | 0.9116      | 1318.30750  | 24.10193     | 1.8078  |

### Chiral HPLC chromatogram of racemic 4ia

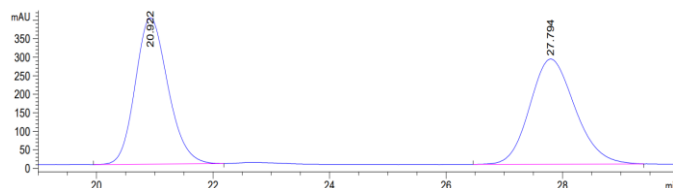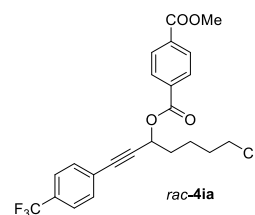

| Peak # | RetTime [min] | Type | Width [min] | Area mAU *s | Height [mAU] | Area %  |
|--------|---------------|------|-------------|-------------|--------------|---------|
| 1      | 20.922        | BB   | 0.5971      | 1.53239e4   | 394.60956    | 50.0677 |
| 2      | 27.794        | BB   | 0.8225      | 1.52825e4   | 283.70477    | 49.9323 |

### Chiral HPLC chromatogram of 4ia

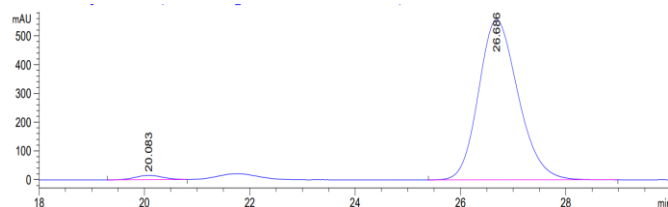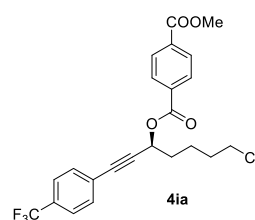

| Peak # | RetTime [min] | Type | Width [min] | Area mAU *s | Height [mAU] | Area %  |
|--------|---------------|------|-------------|-------------|--------------|---------|
| 1      | 20.083        | BB   | 0.5234      | 538.44165   | 14.97637     | 1.8220  |
| 2      | 26.686        | BB   | 0.8048      | 2.90136e4   | 555.97205    | 98.1780 |

### Chiral HPLC chromatogram of racemic 4ja

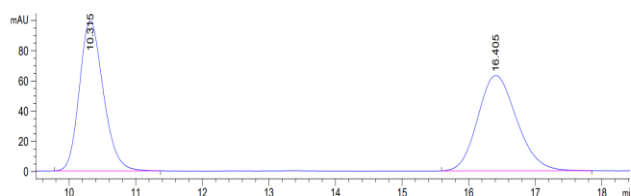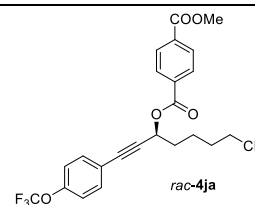

| Peak # | RetTime [min] | Type | Width [min] | Area mAU *s | Height [mAU] | Area %  |
|--------|---------------|------|-------------|-------------|--------------|---------|
| 1      | 10.315        | BB   | 0.3868      | 2474.82813  | 99.29336     | 49.1357 |
| 2      | 16.405        | BB   | 0.6160      | 2561.89136  | 63.05993     | 50.8643 |

### Chiral HPLC chromatogram of 4ja

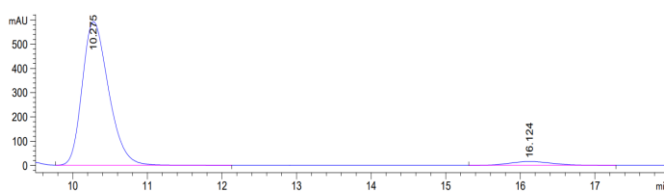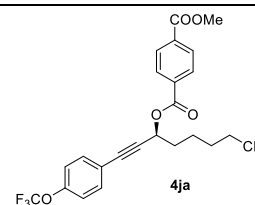

| Peak # | RetTime [min] | Type | Width [min] | Area mAU *s | Height [mAU] | Area %  |
|--------|---------------|------|-------------|-------------|--------------|---------|
| 1      | 10.275        | VB   | 0.3798      | 1.45113e4   | 592.32416    | 95.9824 |
| 2      | 16.124        | BB   | 0.5657      | 607.41559   | 15.48215     | 4.0176  |

### Chiral HPLC chromatogram of racemic 4ka

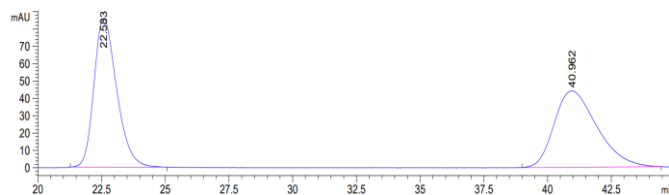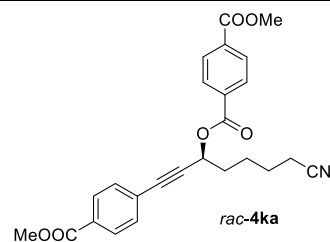

| Peak # | RetTime [min] | Type | Width [min] | Area mAU *s | Height [mAU] | Area %  |
|--------|---------------|------|-------------|-------------|--------------|---------|
| 1      | 22.583        | BB   | 0.8737      | 5311.14941  | 85.86082     | 50.7871 |
| 2      | 40.962        | BB   | 1.3663      | 5146.51953  | 44.07512     | 49.2129 |

### Chiral HPLC chromatogram of 4ka

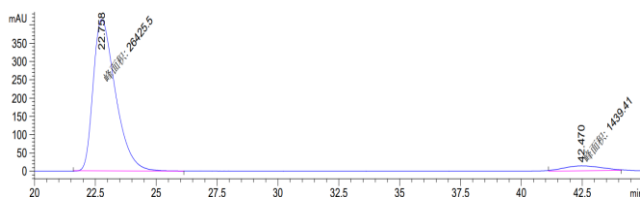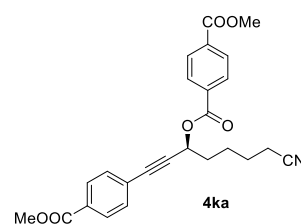

| Peak # | RetTime [min] | Type | Width [min] | Area mAU *s | Height [mAU] | Area %  |
|--------|---------------|------|-------------|-------------|--------------|---------|
| 1      | 22.758        | MM   | 1.0647      | 2.64255e4   | 413.66782    | 94.8343 |
| 2      | 42.470        | MM   | 1.7867      | 1439.40649  | 13.42674     | 5.1657  |

### Chiral HPLC chromatogram of racemic 4la

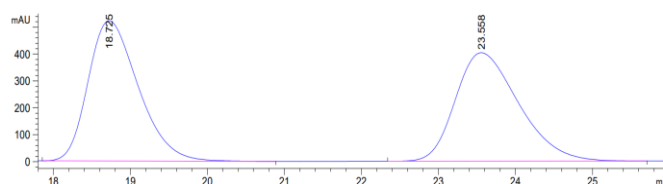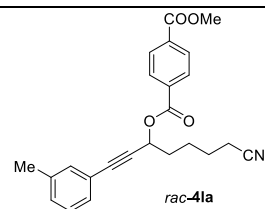

| Peak # | RetTime [min] | Type | Width [min] | Area mAU *s | Height [mAU] | Area %  |
|--------|---------------|------|-------------|-------------|--------------|---------|
| 1      | 18.725        | BB   | 0.7018      | 2.35732e4   | 521.05475    | 50.6562 |
| 2      | 23.558        | BB   | 0.8829      | 2.29624e4   | 402.93149    | 49.3438 |

### Chiral HPLC chromatogram of 4la

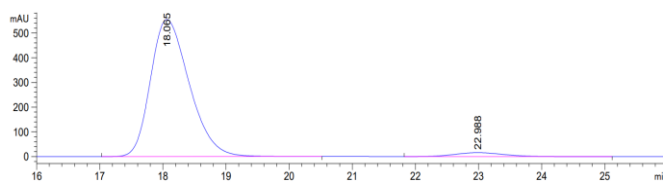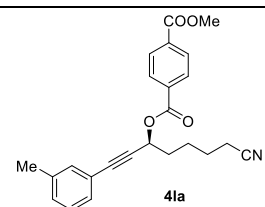

| Peak # | RetTime [min] | Type | Width [min] | Area mAU *s | Height [mAU] | Area %  |
|--------|---------------|------|-------------|-------------|--------------|---------|
| 1      | 18.065        | BB   | 0.6585      | 2.35906e4   | 554.30634    | 96.5560 |
| 2      | 22.988        | BB   | 0.8083      | 841.43146   | 15.67513     | 3.4440  |

### Chiral HPLC chromatogram of racemic 4ma

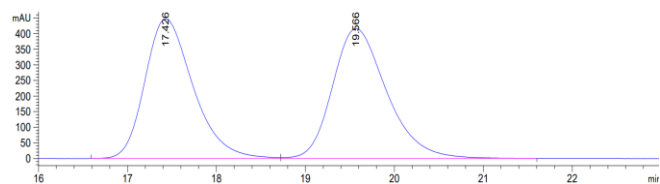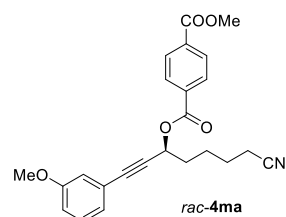

| Peak # | RetTime [min] | Type | Width [min] | Area mAU *s | Height [mAU] | Area %  |
|--------|---------------|------|-------------|-------------|--------------|---------|
| 1      | 17.426        | BV   | 0.5707      | 1.68262e4   | 447.43515    | 48.8640 |
| 2      | 19.566        | VB   | 0.6418      | 1.76086e4   | 416.04367    | 51.1360 |

### Chiral HPLC chromatogram of 4ma

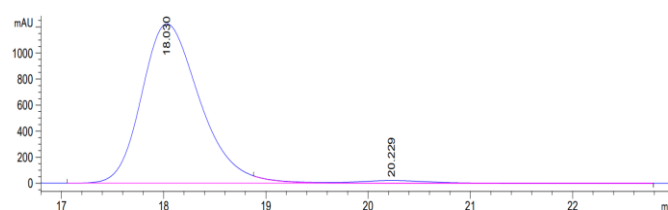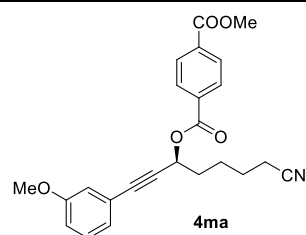

| Peak # | RetTime [min] | Type | Width [min] | Area mAU *s | Height [mAU] | Area %  |
|--------|---------------|------|-------------|-------------|--------------|---------|
| 1      | 18.030        | BV R | 0.6100      | 4.84343e4   | 1223.04114   | 97.8885 |
| 2      | 20.229        | VB E | 0.7509      | 1044.74805  | 20.42156     | 2.1115  |

### Chiral HPLC chromatogram of racemic 4na

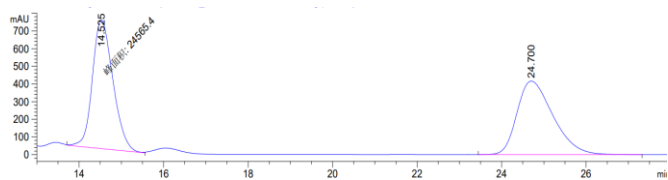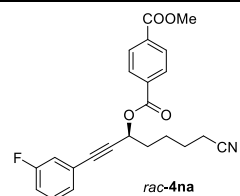

| Peak # | RetTime [min] | Type | Width [min] | Area mAU *s | Height [mAU] | Area %  |
|--------|---------------|------|-------------|-------------|--------------|---------|
| 1      | 14.525        | MM   | 0.5619      | 2.45654e4   | 728.65869    | 50.0741 |
| 2      | 24.700        | BB   | 0.9037      | 2.44927e4   | 415.49844    | 49.9259 |

### Chiral HPLC chromatogram of 4na

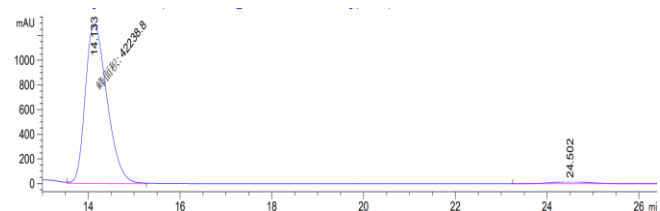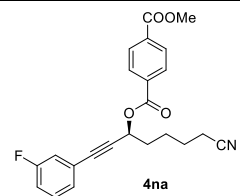

| Peak # | RetTime [min] | Type | Width [min] | Area mAU *s | Height [mAU] | Area %  |
|--------|---------------|------|-------------|-------------|--------------|---------|
| 1      | 14.133        | MM   | 0.5449      | 4.22388e4   | 1291.89673   | 98.1082 |
| 2      | 24.502        | BB   | 0.8139      | 814.50043   | 14.75689     | 1.8918  |



### Chiral HPLC chromatogram of racemic 4oa

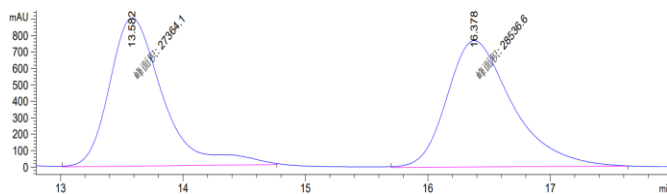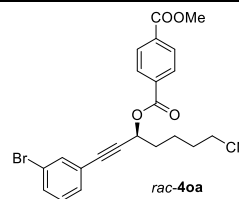

| Peak # | RetTime [min] | Type | Width [min] | Area mAU *s | Height [mAU] | Area %  |
|--------|---------------|------|-------------|-------------|--------------|---------|
| 1      | 13.582        | MM   | 0.5058      | 2.73641e4   | 901.73438    | 48.9513 |
| 2      | 16.378        | MM   | 0.6191      | 2.85366e4   | 768.20776    | 51.0487 |

### Chiral HPLC chromatogram of 4oa

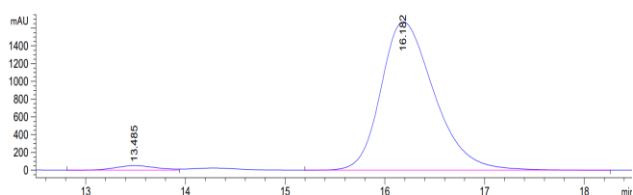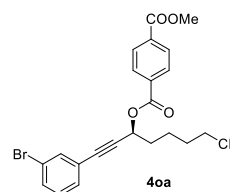

| Peak # | RetTime [min] | Type | Width [min] | Area mAU *s | Height [mAU] | Area %  |
|--------|---------------|------|-------------|-------------|--------------|---------|
| 1      | 13.485        | BV   | 0.4432      | 1464.42297  | 50.67054     | 2.3118  |
| 2      | 16.182        | BB   | 0.5683      | 6.18798e4   | 1669.92505   | 97.6882 |

### Chiral HPLC chromatogram of racemic 4pa

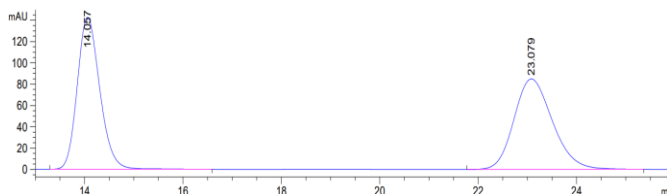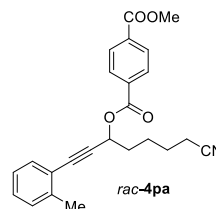

| Peak # | RetTime [min] | Type | Width [min] | Area mAU *s | Height [mAU] | Area %  |
|--------|---------------|------|-------------|-------------|--------------|---------|
| 1      | 14.057        | BB   | 0.4905      | 4525.12842  | 142.50616    | 49.6560 |
| 2      | 23.079        | BB   | 0.8416      | 4587.81738  | 84.73967     | 50.3440 |

### Chiral HPLC chromatogram of 4pa

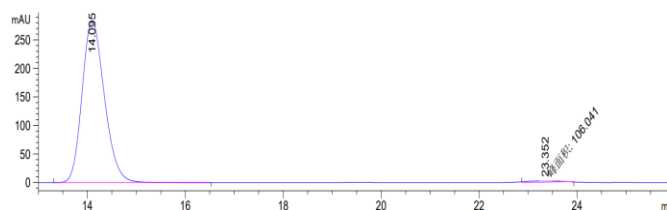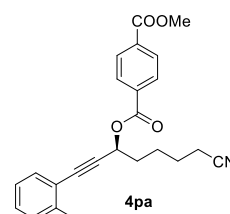

| Peak # | RetTime [min] | Type | Width [min] | Area mAU *s | Height [mAU] | Area %  |
|--------|---------------|------|-------------|-------------|--------------|---------|
| 1      | 14.095        | BB   | 0.4889      | 8983.24902  | 284.08578    | 98.8333 |
| 2      | 23.352        | MM   | 0.6830      | 106.04147   | 2.58774      | 1.1667  |

### Chiral HPLC chromatogram of racemic 4qa

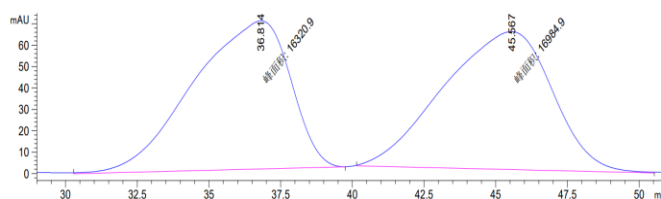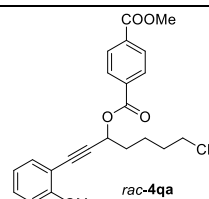

| Peak # | RetTime [min] | Type | Width [min] | Area mAU *s | Height [mAU] | Area %  |
|--------|---------------|------|-------------|-------------|--------------|---------|
| 1      | 36.814        | MM   | 3.9308      | 1.63209e4   | 69.20119     | 49.0032 |
| 2      | 45.567        | MM   | 4.3893      | 1.69849e4   | 64.49287     | 50.9968 |

### Chiral HPLC chromatogram of 4qa

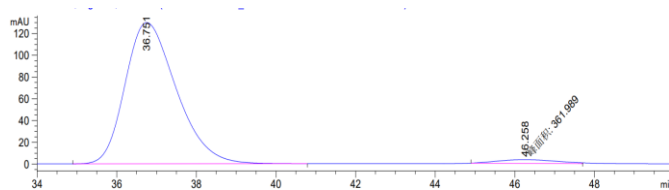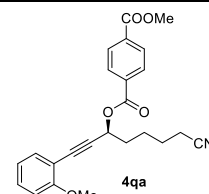

| Peak # | RetTime [min] | Type | Width [min] | Area mAU *s | Height [mAU] | Area %  |
|--------|---------------|------|-------------|-------------|--------------|---------|
| 1      | 36.751        | BB   | 1.3423      | 1.15966e4   | 129.79819    | 96.9730 |
| 2      | 46.258        | MM   | 1.7299      | 361.98923   | 3.48767      | 3.0270  |

### Chiral HPLC chromatogram of racemic 4ra

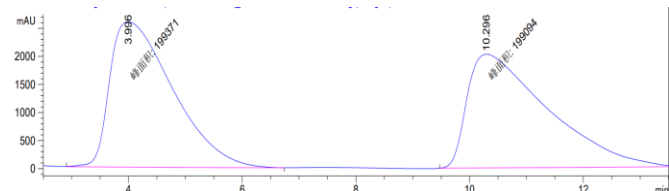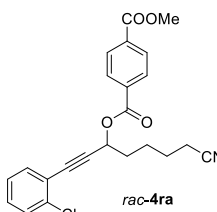

| Peak # | RetTime [min] | Type | Width [min] | Area mAU *s | Height [mAU] | Area %  |
|--------|---------------|------|-------------|-------------|--------------|---------|
| 1      | 3.996         | MM   | 1.2820      | 1.99371e5   | 2592.02002   | 50.0348 |
| 2      | 10.296        | MM   | 1.6367      | 1.99094e5   | 2027.34521   | 49.9652 |

### Chiral HPLC chromatogram of 4ra

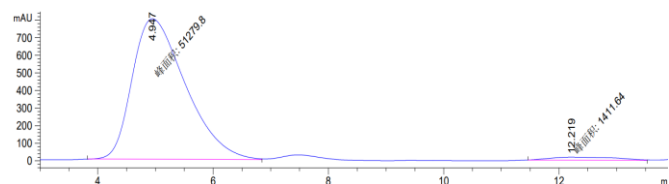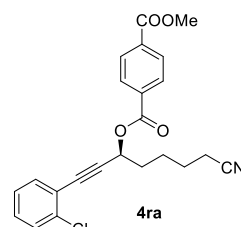

| Peak # | RetTime [min] | Type | Width [min] | Area mAU *s | Height [mAU] | Area %  |
|--------|---------------|------|-------------|-------------|--------------|---------|
| 1      | 4.947         | MM   | 1.0700      | 5.12798e4   | 798.71747    | 97.3209 |
| 2      | 12.219        | MM   | 1.3687      | 1411.63855  | 17.18926     | 2.6791  |

### Chiral HPLC chromatogram of racemic 4sa

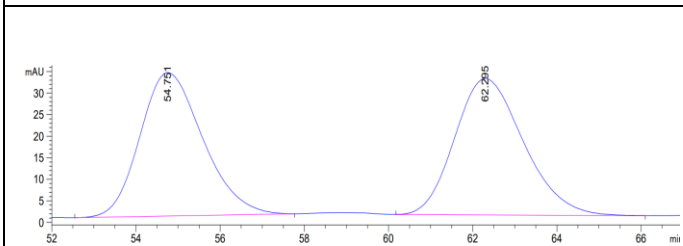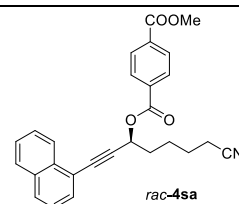

| Peak # | RetTime [min] | Type | Width [min] | Area mAU *s | Height [mAU] | Area %  |
|--------|---------------|------|-------------|-------------|--------------|---------|
| 1      | 54.751        | BB   | 1.4664      | 3451.58813  | 33.26871     | 49.0084 |
| 2      | 62.295        | BB   | 1.4183      | 3591.26489  | 31.68695     | 50.9916 |

### Chiral HPLC chromatogram of 4sa

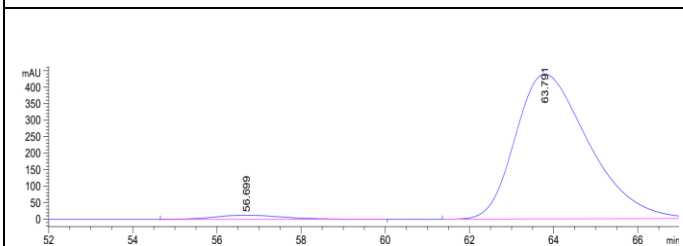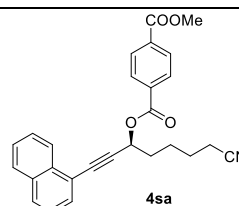

| Peak # | RetTime [min] | Type | Width [min] | Area mAU *s | Height [mAU] | Area %  |
|--------|---------------|------|-------------|-------------|--------------|---------|
| 1      | 56.699        | BB   | 1.3067      | 1373.43628  | 12.43390     | 2.5197  |
| 2      | 63.791        | BB   | 1.8548      | 5.31337e4   | 438.77386    | 97.4803 |

### Chiral HPLC chromatogram of racemic 4ta

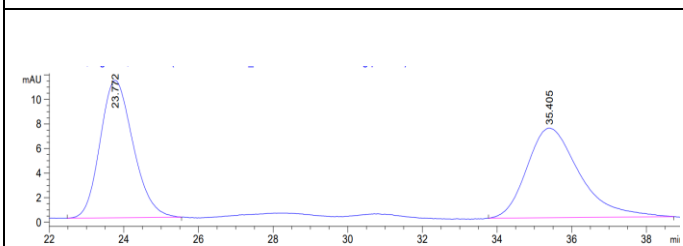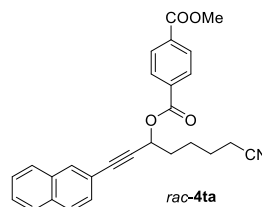

| Peak # | RetTime [min] | Type | Width [min] | Area mAU *s | Height [mAU] | Area %  |
|--------|---------------|------|-------------|-------------|--------------|---------|
| 1      | 23.772        | BB   | 0.8455      | 686.08771   | 11.18645     | 49.0262 |
| 2      | 35.405        | BB   | 1.1574      | 713.34418   | 7.29105      | 50.9738 |

### Chiral HPLC chromatogram of 4ta

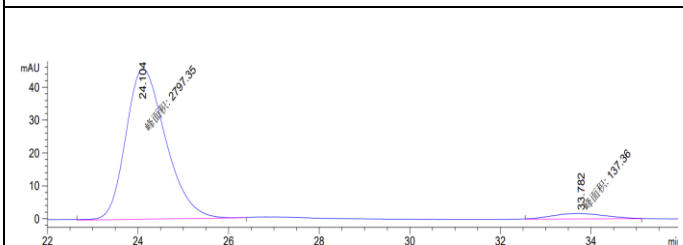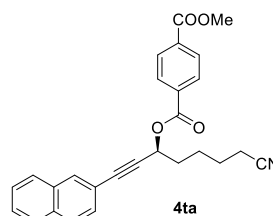

| Peak # | RetTime [min] | Type | Width [min] | Area mAU *s | Height [mAU] | Area %  |
|--------|---------------|------|-------------|-------------|--------------|---------|
| 1      | 24.104        | MM   | 1.0185      | 2797.35303  | 45.77496     | 95.3195 |
| 2      | 33.782        | MM   | 1.3567      | 137.36012   | 1.68747      | 4.6805  |

### Chiral HPLC chromatogram of racemic 4ua

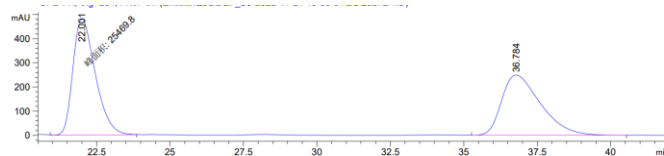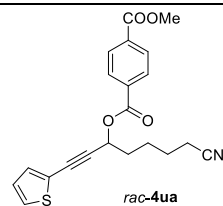

| Peak # | RetTime [min] | Type | Width [min] | Area mAU *s | Height [mAU] | Area %  |
|--------|---------------|------|-------------|-------------|--------------|---------|
| 1      | 22.001        | MM   | 0.8803      | 2.54698e4   | 482.20126    | 52.7385 |
| 2      | 36.784        | BB   | 1.3244      | 2.28247e4   | 248.78468    | 47.2615 |

### Chiral HPLC chromatogram of 4ua

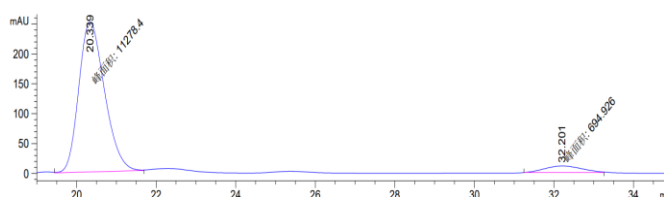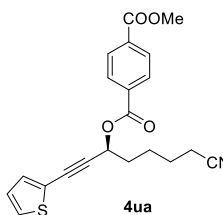

| Peak # | RetTime [min] | Type | Width [min] | Area mAU *s | Height [mAU] | Area %  |
|--------|---------------|------|-------------|-------------|--------------|---------|
| 1      | 20.339        | MM   | 0.7485      | 1.12784e4   | 251.13148    | 94.1960 |
| 2      | 32.201        | MM   | 1.0717      | 694.92627   | 10.80742     | 5.8040  |

### Chiral HPLC chromatogram of racemic 4va

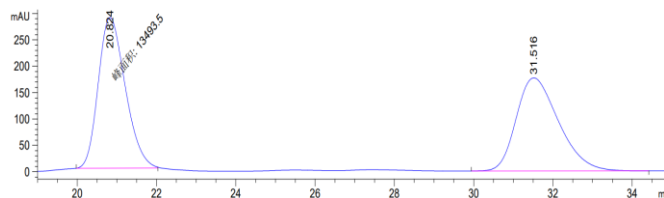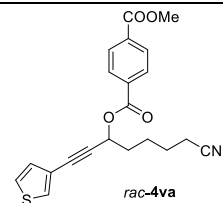

| Peak # | RetTime [min] | Type | Width [min] | Area mAU *s | Height [mAU] | Area %  |
|--------|---------------|------|-------------|-------------|--------------|---------|
| 1      | 20.824        | MM   | 0.7866      | 1.34935e4   | 285.91623    | 50.8143 |
| 2      | 31.516        | BB   | 1.1378      | 1.30610e4   | 176.39807    | 49.1857 |

### Chiral HPLC chromatogram of 4va

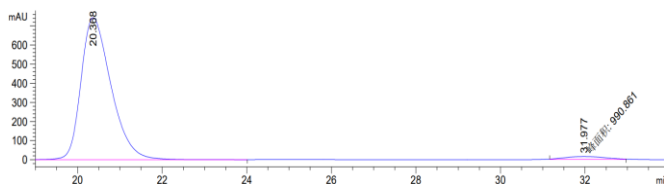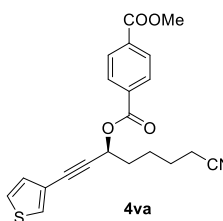

| Peak # | RetTime [min] | Type | Width [min] | Area mAU *s | Height [mAU] | Area %  |
|--------|---------------|------|-------------|-------------|--------------|---------|
| 1      | 20.368        | BB   | 0.7586      | 3.65592e4   | 742.23889    | 97.3612 |
| 2      | 31.977        | MM   | 1.0813      | 990.86139   | 15.27252     | 2.6388  |

### Chiral HPLC chromatogram of racemic 4wa

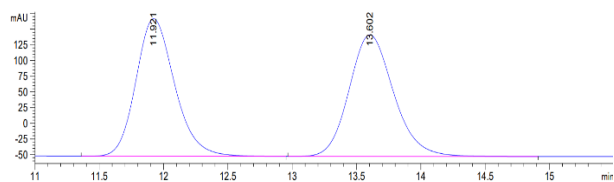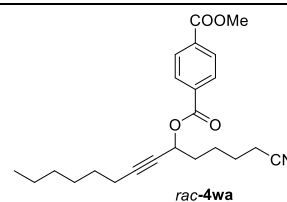

| Peak # | RetTime [min] | Type | Width [min] | Area mAU   | Area *s | Height [mAU] | Area %  |
|--------|---------------|------|-------------|------------|---------|--------------|---------|
| 1      | 11.921        | BB   | 0.3204      | 4595.84473 |         | 219.38791    | 49.6284 |
| 2      | 13.602        | BB   | 0.3706      | 4664.67480 |         | 193.91878    | 50.3716 |

### Chiral HPLC chromatogram of 4wa

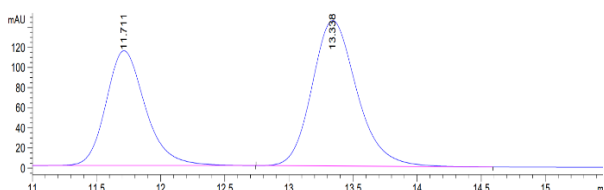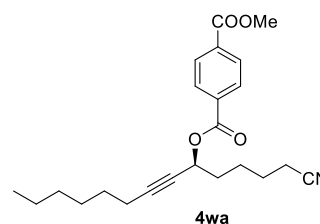

| Peak # | RetTime [min] | Type | Width [min] | Area mAU   | Area *s | Height [mAU] | Area %  |
|--------|---------------|------|-------------|------------|---------|--------------|---------|
| 1      | 11.711        | BB   | 0.3282      | 2450.10571 |         | 114.23812    | 41.0626 |
| 2      | 13.338        | BB   | 0.3736      | 3516.65503 |         | 144.64700    | 58.9374 |

### Chiral HPLC chromatogram of racemic 4xa

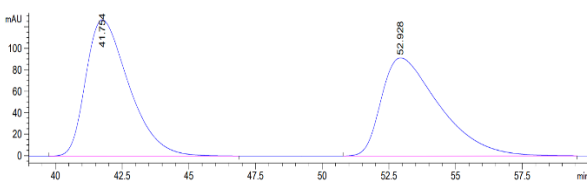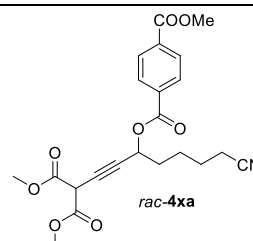

| Peak # | RetTime [min] | Type | Width [min] | Area mAU  | Area *s | Height [mAU] | Area %  |
|--------|---------------|------|-------------|-----------|---------|--------------|---------|
| 1      | 41.754        | BB   | 1.6666      | 1.42450e4 |         | 126.80149    | 50.8158 |
| 2      | 52.928        | BB   | 2.0969      | 1.37876e4 |         | 91.14021     | 49.1842 |

### Chiral HPLC chromatogram of 4xa

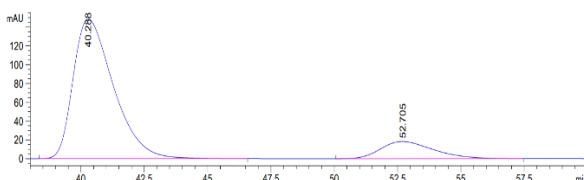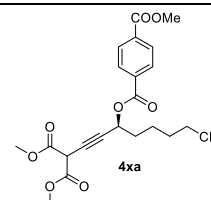

| Peak # | RetTime [min] | Type | Width [min] | Area mAU   | Area *s | Height [mAU] | Area %  |
|--------|---------------|------|-------------|------------|---------|--------------|---------|
| 1      | 40.288        | BB   | 1.6209      | 1.64002e4  |         | 148.22200    | 86.1691 |
| 2      | 52.705        | BB   | 1.6989      | 2632.36353 |         | 18.18356     | 13.8309 |

### Chiral HPLC chromatogram of racemic 5ba

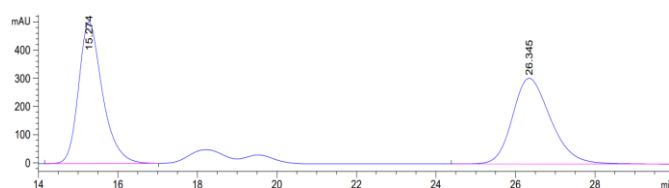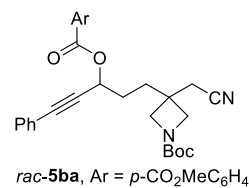

| Peak # | RetTime [min] | Type | Width [min] | Area mAU  | Area *s | Height [mAU] | Area %  |
|--------|---------------|------|-------------|-----------|---------|--------------|---------|
| 1      | 15.274        | BB   | 0.6304      | 2.09303e4 |         | 502.00470    | 50.7278 |
| 2      | 26.345        | BB   | 1.0208      | 2.03298e4 |         | 303.77676    | 49.2722 |

### Chiral HPLC chromatogram of 7a

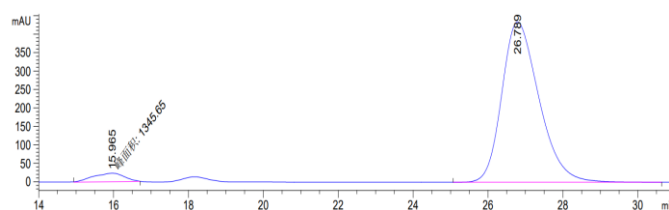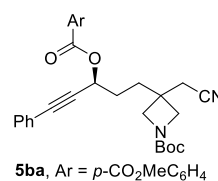

| Peak # | RetTime [min] | Type | Width [min] | Area mAU   | Area *s | Height [mAU] | Area %  |
|--------|---------------|------|-------------|------------|---------|--------------|---------|
| 1      | 15.965        | MM   | 0.9703      | 1345.65027 |         | 23.11349     | 4.3056  |
| 2      | 26.789        | BB   | 1.0616      | 2.99075e4  |         | 434.19070    | 95.6944 |

### Chiral HPLC chromatogram of racemic 5ca

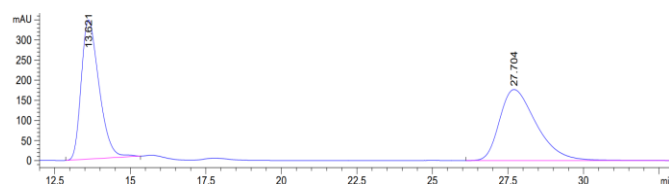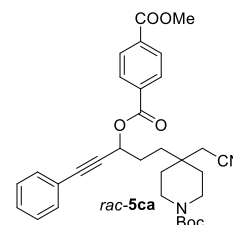

| Peak # | RetTime [min] | Type | Width [min] | Area mAU  | Area *s | Height [mAU] | Area %  |
|--------|---------------|------|-------------|-----------|---------|--------------|---------|
| 1      | 13.621        | BB   | 0.6253      | 1.41594e4 |         | 346.07959    | 48.7762 |
| 2      | 27.704        | BB   | 1.2982      | 1.48699e4 |         | 176.61806    | 51.2238 |

### Chiral HPLC chromatogram of 5ca

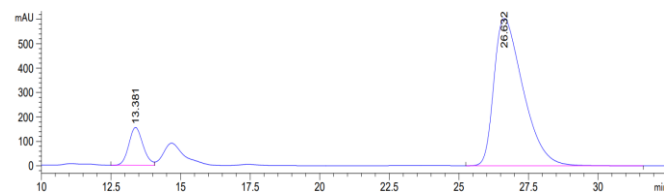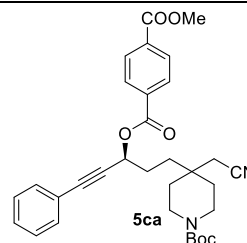

| Peak # | RetTime [min] | Type | Width [min] | Area mAU   | Area *s | Height [mAU] | Area %  |
|--------|---------------|------|-------------|------------|---------|--------------|---------|
| 1      | 13.381        | BV   | 0.5444      | 5508.02197 |         | 155.07568    | 11.1726 |
| 2      | 26.632        | BB   | 1.1115      | 4.37914e4  |         | 602.82513    | 88.8274 |

### Chiral HPLC chromatogram of racemic 5da

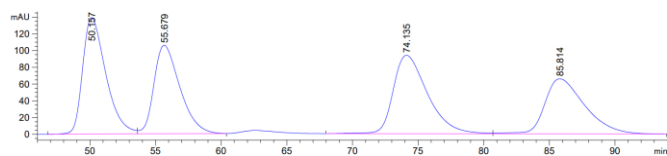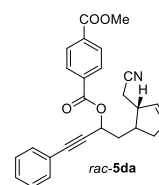

| Peak # | RetTime [min] | Type | Width [min] | Area mAU *s | Height [mAU] | Area %  |
|--------|---------------|------|-------------|-------------|--------------|---------|
| 1      | 50.157        | BV   | 1.9136      | 1.70333e4   | 138.61842    | 27.2812 |
| 2      | 55.679        | VB   | 2.1181      | 1.45069e4   | 105.37676    | 23.2348 |
| 3      | 74.135        | BV   | 2.7899      | 1.69884e4   | 93.58150     | 27.2092 |
| 4      | 85.814        | VB   | 3.2053      | 1.39076e4   | 65.70885     | 22.2749 |

### Chiral HPLC chromatogram of 5da

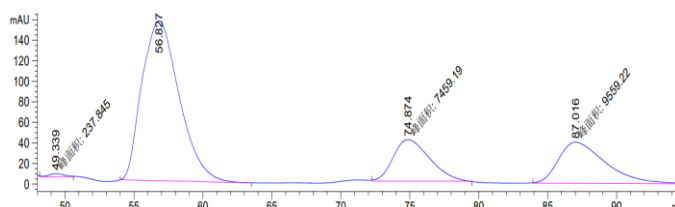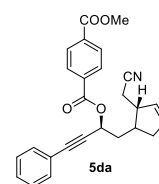

| Peak # | RetTime [min] | Type | Width [min] | Area mAU *s | Height [mAU] | Area %  |
|--------|---------------|------|-------------|-------------|--------------|---------|
| 1      | 49.339        | MM   | 1.3065      | 237.84451   | 3.03415      | 0.5109  |
| 2      | 56.827        | BB   | 2.5600      | 2.92977e4   | 155.79420    | 62.9328 |
| 3      | 74.874        | MM   | 3.0733      | 7459.18994  | 40.45102     | 16.0227 |
| 4      | 87.016        | MM   | 3.9644      | 9559.22168  | 40.18769     | 20.5336 |

### Chiral HPLC chromatogram of racemic 5ea

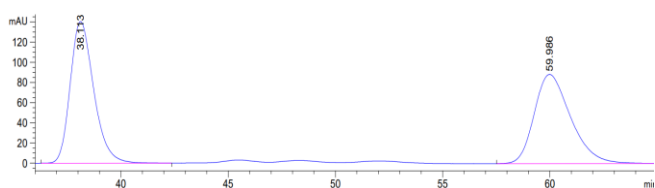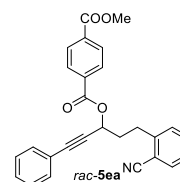

| Peak # | RetTime [min] | Type | Width [min] | Area mAU *s | Height [mAU] | Area %  |
|--------|---------------|------|-------------|-------------|--------------|---------|
| 1      | 38.113        | BB   | 1.1524      | 1.07120e4   | 140.35490    | 50.7248 |
| 2      | 59.986        | BBA  | 1.7168      | 1.04059e4   | 88.30840     | 49.2752 |

### Chiral HPLC chromatogram of 5ea

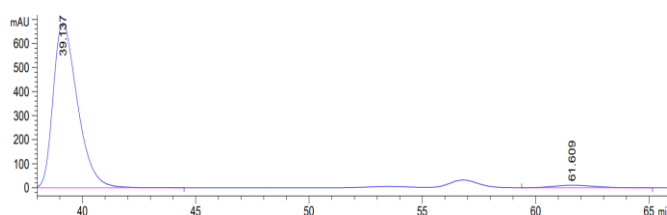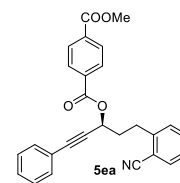

| Peak # | RetTime [min] | Type | Width [min] | Area mAU *s | Height [mAU] | Area % |
|--------|---------------|------|-------------|-------------|--------------|--------|
| 1      | 38.137        |      |             |             |              |        |
| 2      | 61.609        |      |             |             |              |        |

|   |        |    |        |            |           |         |
|---|--------|----|--------|------------|-----------|---------|
| 1 | 39.137 | BB | 1.1364 | 5.07272e4  | 684.61877 | 97.5723 |
| 2 | 61.609 | BB | 1.4450 | 1262.16284 | 10.33315  | 2.4277  |

### Chiral HPLC chromatogram of racemic 5fa

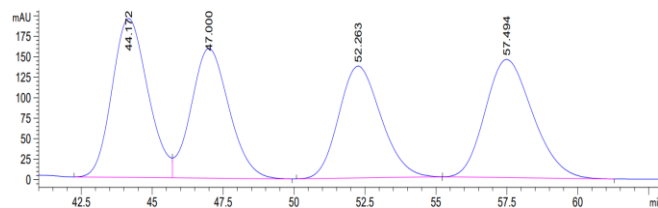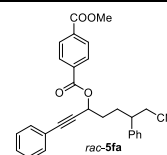

| Peak # | RetTime [min] | Type | Width [min] | Area mAU *s | Height [mAU] | Area %  |
|--------|---------------|------|-------------|-------------|--------------|---------|
| 1      | 44.172        | BV   | 1.3178      | 1.69954e4   | 194.04349    | 27.1038 |
| 2      | 47.000        | VB   | 1.3892      | 1.47144e4   | 158.48764    | 23.4661 |
| 3      | 52.263        | BB   | 1.5369      | 1.41718e4   | 136.53653    | 22.6008 |
| 4      | 57.494        | BB   | 1.7231      | 1.68234e4   | 144.20512    | 26.8294 |

### Chiral HPLC chromatogram of 5fa

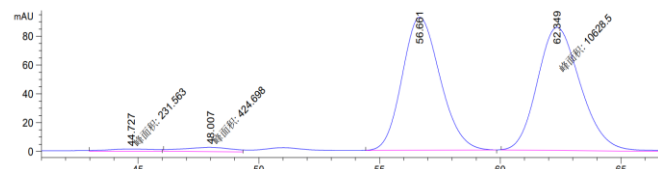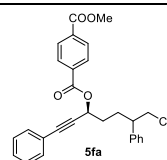

| Peak # | RetTime [min] | Type | Width [min] | Area mAU *s | Height [mAU] | Area %  |
|--------|---------------|------|-------------|-------------|--------------|---------|
| 1      | 44.727        | MM   | 2.3402      | 231.56281   | 1.64920      | 1.0839  |
| 2      | 48.007        | MM   | 2.3329      | 424.69827   | 3.03411      | 1.9879  |
| 3      | 56.661        | BB   | 1.5470      | 1.00799e4   | 92.37705     | 47.1803 |
| 4      | 62.349        | MM   | 2.0692      | 1.06285e4   | 85.60879     | 49.7480 |

### Chiral HPLC chromatogram of racemic 5cc

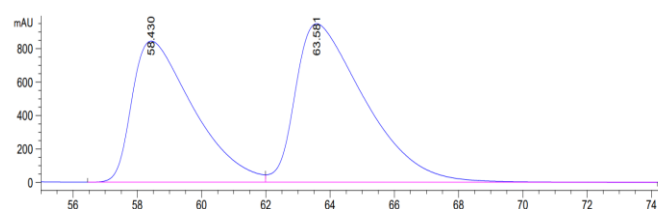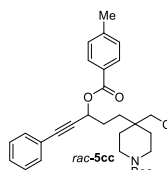

| Peak # | RetTime [min] | Type | Width [min] | Area mAU *s | Height [mAU] | Area %  |
|--------|---------------|------|-------------|-------------|--------------|---------|
| 1      | 58.430        | BV   | 1.9508      | 1.11841e5   | 843.55957    | 48.8640 |
| 2      | 63.581        | VB   | 2.1791      | 1.42336e5   | 947.20911    | 51.1360 |

### Chiral HPLC chromatogram of 5cc

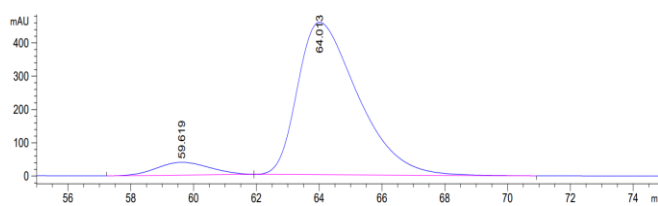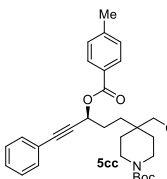

| Peak # | RetTime [min] | Type | Width [min] | Area mAU *s | Height [mAU] | Area % |
|--------|---------------|------|-------------|-------------|--------------|--------|
| 1      | 58.619        |      |             |             |              |        |
| 2      | 64.033        |      |             |             |              |        |



|  |   |        |    |        |            |           |         |
|--|---|--------|----|--------|------------|-----------|---------|
|  | 1 | 59.619 | BB | 1.5723 | 4504.42236 | 38.46289  | 6.8685  |
|  | 2 | 64.013 | BB | 2.0048 | 6.10768e4  | 457.71579 | 93.1315 |

### Chiral HPLC chromatogram of racemic 5ga

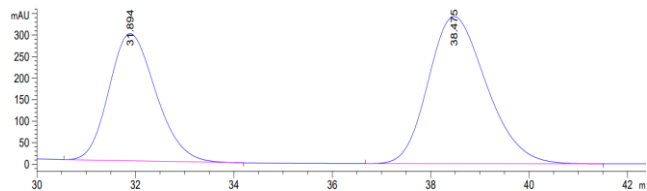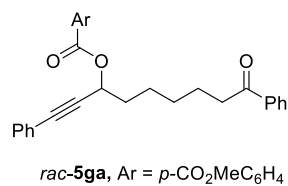

| Peak # | RetTime [min] | Type | Width [min] | Area mAU *s | Height [mAU] | Area %  |
|--------|---------------|------|-------------|-------------|--------------|---------|
| 1      | 31.894        | BB   | 1.0246      | 1.95534e4   | 295.26044    | 50.6562 |
| 2      | 38.475        | BB   | 1.2720      | 2.80759e4   | 341.90616    | 49.3438 |

### Chiral HPLC chromatogram of 5ga

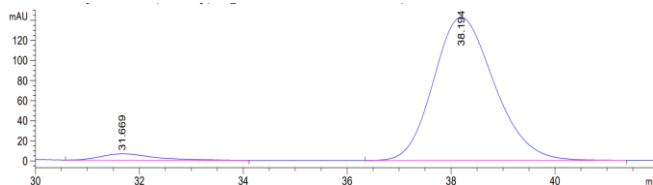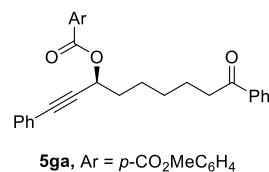

| Peak # | RetTime [min] | Type | Width [min] | Area mAU *s | Height [mAU] | Area %  |
|--------|---------------|------|-------------|-------------|--------------|---------|
| 1      | 31.669        | BB   | 0.8617      | 456.60013   | 6.32899      | 3.7954  |
| 2      | 38.194        | BB   | 1.2317      | 1.15739e4   | 142.48247    | 96.2046 |

### Chiral HPLC chromatogram of racemic 7ab

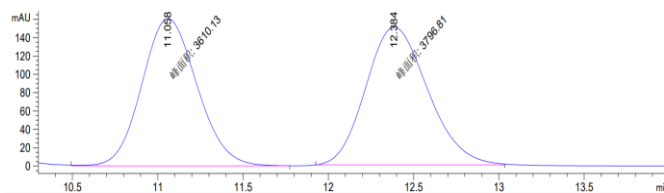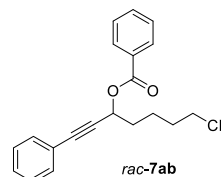

| Peak # | RetTime [min] | Type | Width [min] | Area mAU *s | Height [mAU] | Area %  |
|--------|---------------|------|-------------|-------------|--------------|---------|
| 1      | 11.058        | MM   | 0.3747      | 3610.12598  | 160.56847    | 48.7398 |
| 2      | 12.384        | MM   | 0.4214      | 3796.81274  | 150.17322    | 51.2602 |

### Chiral HPLC chromatogram of 7ab

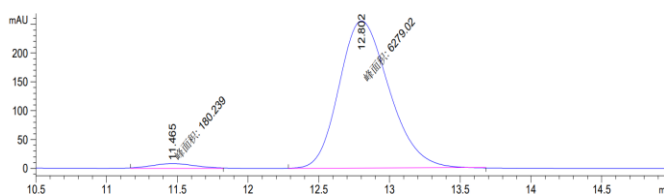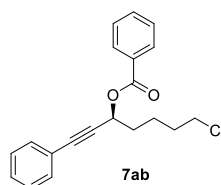

| Peak # | RetTime [min] | Type | Width [min] | Area mAU *s | Height [mAU] | Area %  |
|--------|---------------|------|-------------|-------------|--------------|---------|
| 1      | 11.465        | MM   | 0.3582      | 180.23946   | 8.38562      | 2.7904  |
| 2      | 12.802        | MM   | 0.4099      | 6279.02344  | 255.29530    | 97.2096 |

### Chiral HPLC chromatogram of racemic 7ac

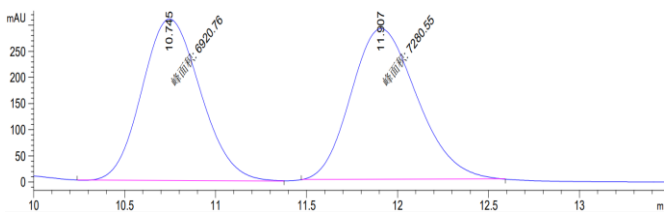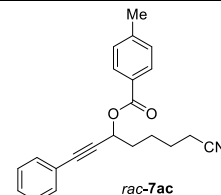

| Peak # | RetTime [min] | Type | Width [min] | Area mAU *s | Height [mAU] | Area %  |
|--------|---------------|------|-------------|-------------|--------------|---------|
| 1      | 10.745        | MM   | 0.3735      | 6920.76318  | 308.84390    | 48.7333 |
| 2      | 11.907        | MM   | 0.4214      | 7280.54590  | 287.93240    | 51.2667 |

### Chiral HPLC chromatogram of 7ac

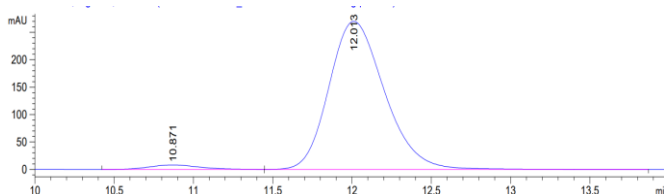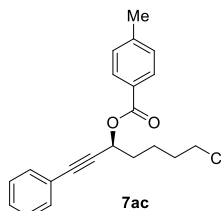

| Peak # | RetTime [min] | Type | Width [min] | Area mAU *s | Height [mAU] | Area %  |
|--------|---------------|------|-------------|-------------|--------------|---------|
| 1      | 10.871        | BB   | 0.3308      | 172.64874   | 8.03257      | 2.5630  |
| 2      | 12.013        | BB   | 0.3756      | 6563.44775  | 270.04062    | 97.4370 |

### Chiral HPLC chromatogram of racemic 7ad

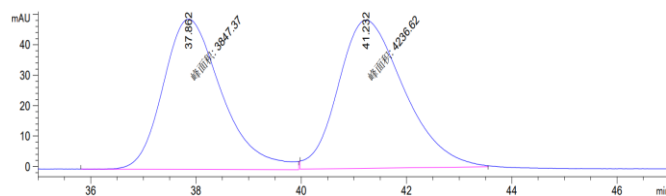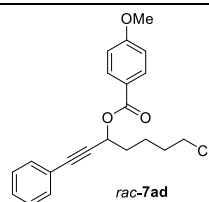

| Peak # | RetTime [min] | Type | Width [min] | Area mAU *s | Height [mAU] | Area %  |
|--------|---------------|------|-------------|-------------|--------------|---------|
| 1      | 37.862        | MM   | 1.2982      | 3847.36646  | 49.39214     | 47.5924 |
| 2      | 41.232        | MM   | 1.4500      | 4236.62354  | 48.69737     | 52.4076 |

### Chiral HPLC chromatogram of 7ad

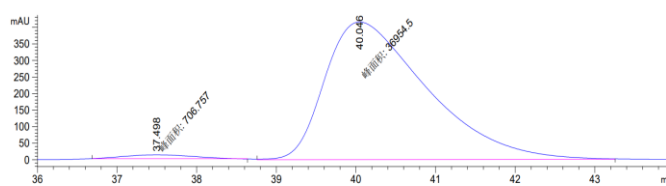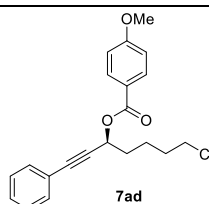

| Peak # | RetTime [min] | Type | Width [min] | Area mAU *s | Height [mAU] | Area %  |
|--------|---------------|------|-------------|-------------|--------------|---------|
| 1      | 37.498        | MM   | 0.9972      | 706.75677   | 11.81195     | 1.8766  |
| 2      | 40.046        | MM   | 1.4813      | 3.69545e4   | 415.80258    | 98.1234 |

### Chiral HPLC chromatogram of racemic 7ae

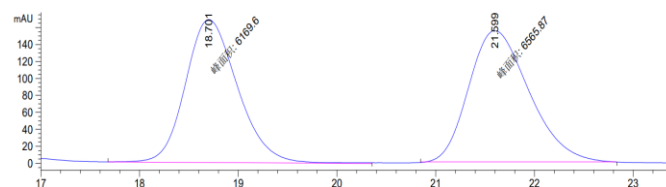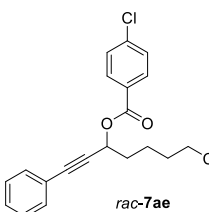

| Peak # | RetTime [min] | Type | Width [min] | Area mAU *s | Height [mAU] | Area %  |
|--------|---------------|------|-------------|-------------|--------------|---------|
| 1      | 18.701        | MM   | 0.6109      | 6169.59619  | 168.31406    | 48.4442 |
| 2      | 21.599        | MM   | 0.7077      | 6565.86865  | 154.62335    | 51.5558 |

### Chiral HPLC chromatogram of 7ae

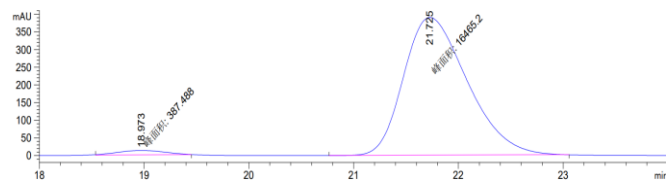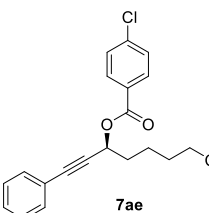

| Peak # | RetTime [min] | Type | Width [min] | Area mAU *s | Height [mAU] | Area %  |
|--------|---------------|------|-------------|-------------|--------------|---------|
| 1      | 18.973        | MM   | 0.5167      | 387.48828   | 12.49762     | 2.2993  |
| 2      | 21.725        | MM   | 0.7034      | 1.64652e4   | 390.14963    | 97.7007 |

### Chiral HPLC chromatogram of racemic 7af

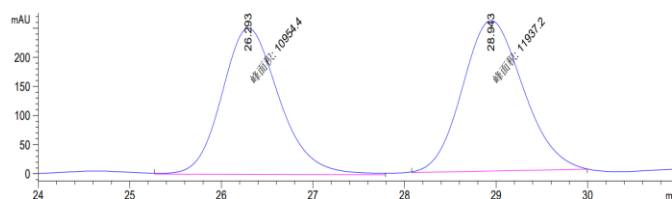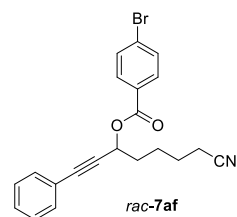

| Peak # | RetTime [min] | Type | Width [min] | Area mAU *s | Height [mAU] | Area %  |
|--------|---------------|------|-------------|-------------|--------------|---------|
| 1      | 26.293        | MM   | 0.7272      | 1.09544e4   | 251.05565    | 47.8534 |
| 2      | 28.943        | MM   | 0.7692      | 1.19372e4   | 258.64316    | 52.1466 |

### Chiral HPLC chromatogram of 7af

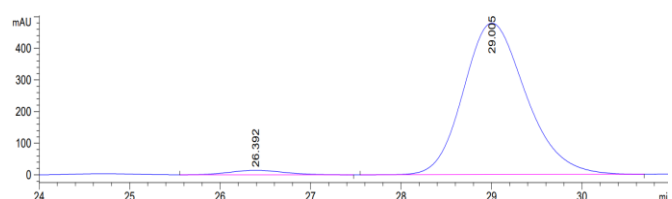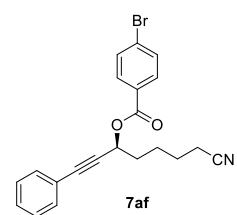

| Peak # | RetTime [min] | Type | Width [min] | Area mAU *s | Height [mAU] | Area %  |
|--------|---------------|------|-------------|-------------|--------------|---------|
| 1      | 26.392        | BB   | 0.6339      | 593.08472   | 14.18254     | 2.5113  |
| 2      | 29.005        | BB   | 0.7391      | 2.30239e4   | 478.73273    | 97.4887 |

### Chiral HPLC chromatogram of racemic 7ag

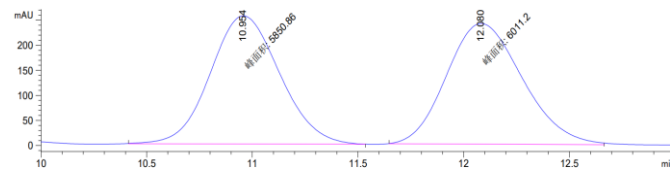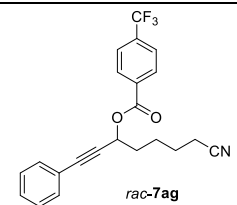

| Peak # | RetTime [min] | Type | Width [min] | Area mAU *s | Height [mAU] | Area %  |
|--------|---------------|------|-------------|-------------|--------------|---------|
| 1      | 10.954        | MM   | 0.3815      | 5850.86133  | 255.57797    | 49.3242 |
| 2      | 12.080        | MM   | 0.4165      | 6011.19580  | 240.55594    | 50.6758 |

### Chiral HPLC chromatogram of 7ag

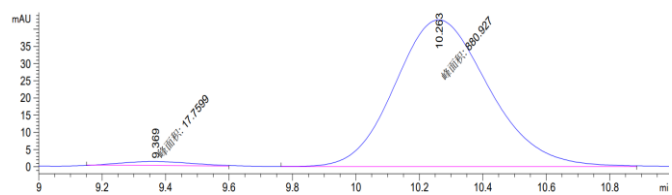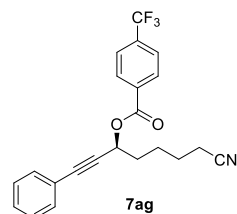

| Peak # | RetTime [min] | Type | Width [min] | Area mAU *s | Height [mAU] | Area %  |
|--------|---------------|------|-------------|-------------|--------------|---------|
| 1      | 9.369         | MM   | 0.2527      | 17.75990    | 1.17117      | 1.9762  |
| 2      | 10.263        | MM   | 0.3444      | 880.92743   | 42.63631     | 98.0238 |

### Chiral HPLC chromatogram of racemic 7ah

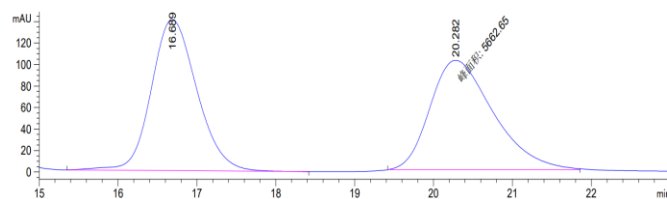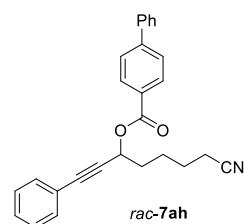

| Peak # | RetTime [min] | Type | Width [min] | Area mAU   | Area *s | Height [mAU] | Area %  |
|--------|---------------|------|-------------|------------|---------|--------------|---------|
| 1      | 16.689        | BB   | 0.6185      | 5651.55371 |         | 140.72766    | 49.9510 |
| 2      | 20.282        | MM   | 0.9270      | 5662.65039 |         | 101.80650    | 50.0490 |

### Chiral HPLC chromatogram of 7ah

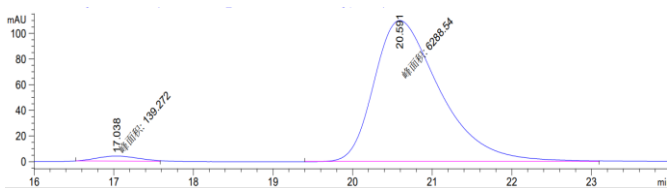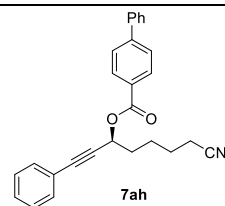

| Peak # | RetTime [min] | Type | Width [min] | Area mAU   | Area *s | Height [mAU] | Area %  |
|--------|---------------|------|-------------|------------|---------|--------------|---------|
| 1      | 17.038        | MM   | 0.5923      | 139.27184  |         | 3.91920      | 2.1667  |
| 2      | 20.591        | MM   | 0.9553      | 6288.53906 |         | 109.71644    | 97.8333 |

### Chiral HPLC chromatogram of racemic 7ai

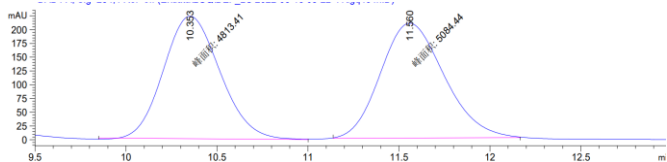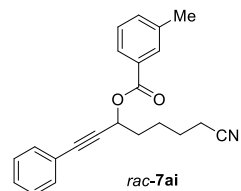

| Peak # | RetTime [min] | Type | Width [min] | Area mAU   | Area *s | Height [mAU] | Area %  |
|--------|---------------|------|-------------|------------|---------|--------------|---------|
| 1      | 10.353        | MM   | 0.3603      | 4813.41455 |         | 222.68799    | 48.6309 |
| 2      | 11.560        | MM   | 0.4059      | 5084.44189 |         | 208.74883    | 51.3691 |

### Chiral HPLC chromatogram of 7ai

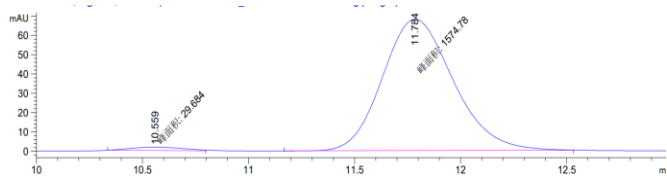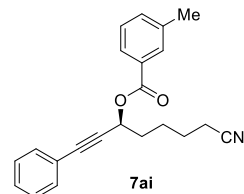

| Peak # | RetTime [min] | Type | Width [min] | Area mAU   | Area *s | Height [mAU] | Area %  |
|--------|---------------|------|-------------|------------|---------|--------------|---------|
| 1      | 10.559        | MM   | 0.2814      | 29.68396   |         | 1.75832      | 1.8501  |
| 2      | 11.784        | MM   | 0.3863      | 1574.78076 |         | 67.93993     | 98.1499 |

### Chiral HPLC chromatogram of racemic 7aj

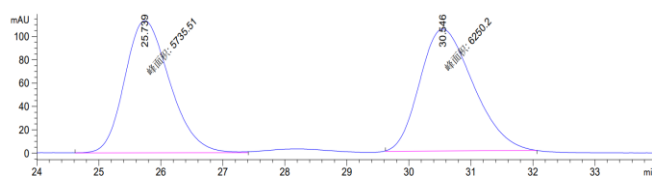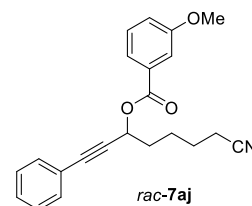

| Peak # | RetTime [min] | Type | Width [min] | Area mAU *s | Height [mAU] | Area %  |
|--------|---------------|------|-------------|-------------|--------------|---------|
| 1      | 25.739        | MM   | 0.8438      | 5735.50635  | 113.28175    | 47.8529 |
| 2      | 30.546        | MM   | 0.9974      | 6250.19678  | 104.44579    | 52.1471 |

### Chiral HPLC chromatogram of 7aj

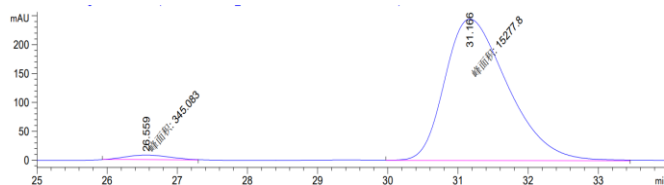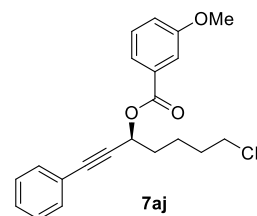

| Peak # | RetTime [min] | Type | Width [min] | Area mAU *s | Height [mAU] | Area %  |
|--------|---------------|------|-------------|-------------|--------------|---------|
| 1      | 26.559        | MM   | 0.7191      | 345.08292   | 7.99793      | 2.2088  |
| 2      | 31.166        | MM   | 1.0392      | 1.52778e4   | 245.01814    | 97.7912 |

### Chiral HPLC chromatogram of racemic 7ak

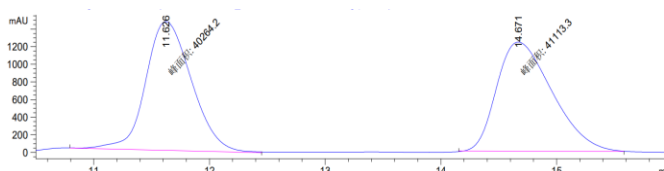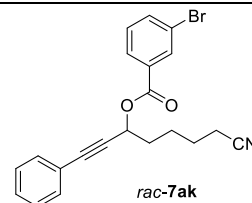

| Peak # | RetTime [min] | Type | Width [min] | Area mAU *s | Height [mAU] | Area %  |
|--------|---------------|------|-------------|-------------|--------------|---------|
| 1      | 11.626        | MM   | 0.4589      | 4.02642e4   | 1462.49927   | 49.4783 |
| 2      | 14.671        | MM   | 0.5535      | 4.11133e4   | 1238.08875   | 50.5217 |

### Chiral HPLC chromatogram of 7ak

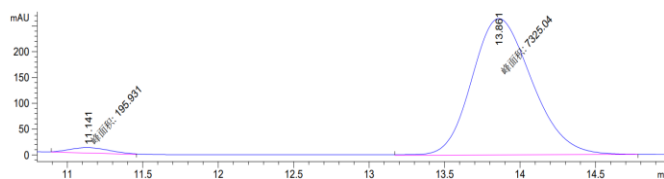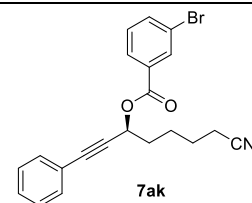

| Peak # | RetTime [min] | Type | Width [min] | Area mAU *s | Height [mAU] | Area %  |
|--------|---------------|------|-------------|-------------|--------------|---------|
| 1      | 11.141        | MM   | 0.3093      | 195.93074   | 10.55700     | 2.6051  |
| 2      | 13.861        | MM   | 0.4615      | 7325.03662  | 264.54074    | 97.3949 |

### Chiral HPLC chromatogram of racemic 7al

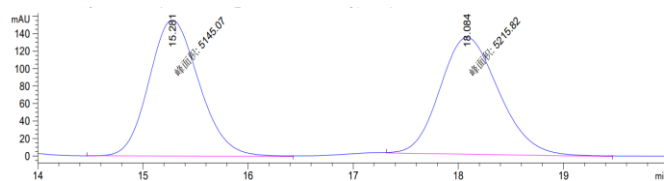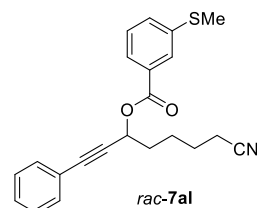

| Peak # | RetTime [min] | Type | Width [min] | Area mAU   | Area *s   | Height [mAU] | Area % |
|--------|---------------|------|-------------|------------|-----------|--------------|--------|
| 1      | 15.281        | MM   | 0.5514      | 5145.07178 | 155.52129 | 49.6586      |        |
| 2      | 18.084        | MM   | 0.6508      | 5215.82178 | 133.57709 | 50.3414      |        |

### Chiral HPLC chromatogram of 7al

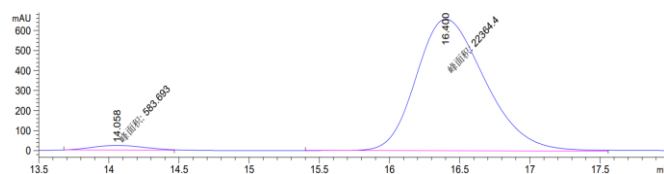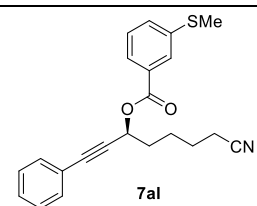

| Peak # | RetTime [min] | Type | Width [min] | Area mAU  | Area *s   | Height [mAU] | Area % |
|--------|---------------|------|-------------|-----------|-----------|--------------|--------|
| 1      | 14.058        | MM   | 0.4243      | 583.69330 | 22.93003  | 2.5435       |        |
| 2      | 16.400        | MM   | 0.5675      | 2.23644e4 | 656.82703 | 97.4565      |        |

### Chiral HPLC chromatogram of racemic 7am

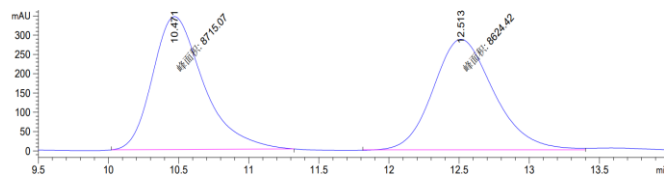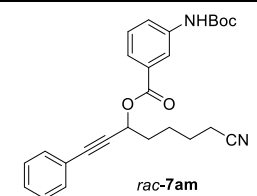

| Peak # | RetTime [min] | Type | Width [min] | Area mAU   | Area *s   | Height [mAU] | Area % |
|--------|---------------|------|-------------|------------|-----------|--------------|--------|
| 1      | 10.471        | MM   | 0.4214      | 8715.07324 | 344.68573 | 50.2614      |        |
| 2      | 12.513        | MM   | 0.5016      | 8624.41504 | 286.58902 | 49.7386      |        |

### Chiral HPLC chromatogram of 7am

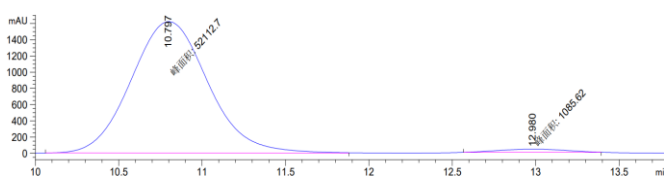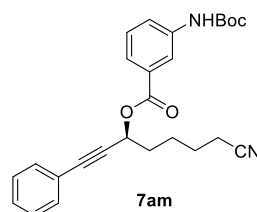

| Peak # | RetTime [min] | Type | Width [min] | Area mAU   | Area *s    | Height [mAU] | Area % |
|--------|---------------|------|-------------|------------|------------|--------------|--------|
| 1      | 10.797        | MM   | 0.5358      | 5.21127e4  | 1620.93616 | 97.9593      |        |
| 2      | 12.980        | MM   | 0.4599      | 1085.61560 | 39.34563   | 2.0407       |        |

### Chiral HPLC chromatogram of racemic 7an

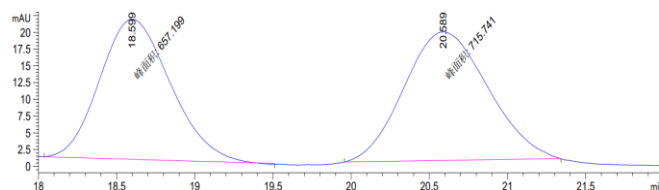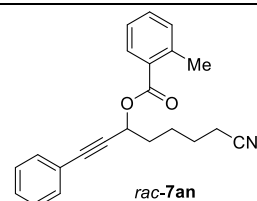

| Peak # | RetTime [min] | Type | Width [min] | Area mAU *s | Height [mAU] | Area %  |
|--------|---------------|------|-------------|-------------|--------------|---------|
| 1      | 18.599        | MM   | 0.5241      | 657.19891   | 20.89902     | 47.8680 |
| 2      | 20.589        | MM   | 0.6219      | 715.74078   | 19.18149     | 52.1320 |

### Chiral HPLC chromatogram of 7an

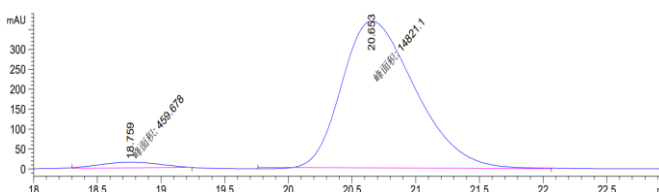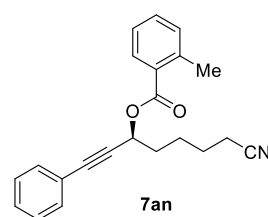

| Peak # | RetTime [min] | Type | Width [min] | Area mAU *s | Height [mAU] | Area %  |
|--------|---------------|------|-------------|-------------|--------------|---------|
| 1      | 18.759        | MM   | 0.5355      | 459.67822   | 14.30752     | 3.0082  |
| 2      | 20.653        | MM   | 0.6691      | 1.48211e4   | 369.17059    | 96.9918 |

### Chiral HPLC chromatogram of racemic 7ao

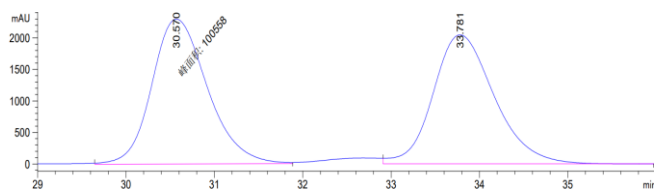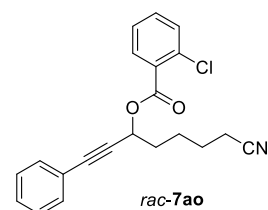

| Peak # | RetTime [min] | Type | Width [min] | Area mAU *s | Height [mAU] | Area %  |
|--------|---------------|------|-------------|-------------|--------------|---------|
| 1      | 30.570        | MM   | 0.7298      | 1.00558e5   | 2296.44360   | 50.4451 |
| 2      | 33.781        | VB   | 0.7411      | 9.87833e4   | 2046.57312   | 49.5549 |

### Chiral HPLC chromatogram of 7ao

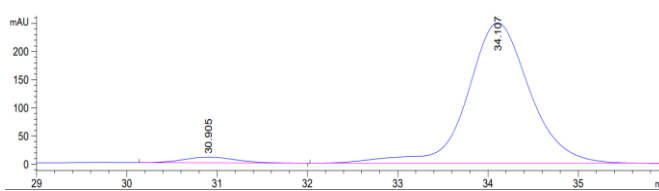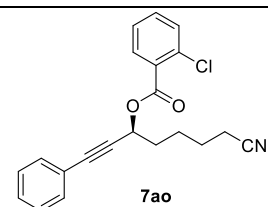

| Peak # | RetTime [min] | Type | Width [min] | Area mAU *s | Height [mAU] | Area %  |
|--------|---------------|------|-------------|-------------|--------------|---------|
| 1      | 30.905        | BB   | 0.5914      | 411.18039   | 10.30792     | 3.3147  |
| 2      | 34.107        | BB   | 0.7271      | 1.19937e4   | 249.37199    | 96.6853 |



### Chiral HPLC chromatogram of racemic 7ap

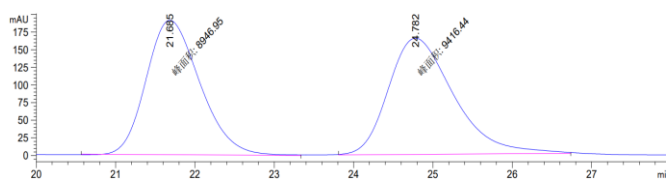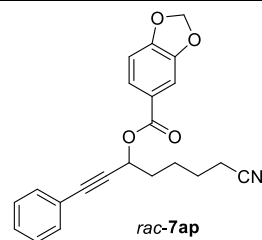

| Peak # | RetTime [min] | Type | Width [min] | Area mAU *s | Height [mAU] | Area %  |
|--------|---------------|------|-------------|-------------|--------------|---------|
| 1      | 21.685        | MM   | 0.7826      | 8946.94531  | 190.54466    | 48.7216 |
| 2      | 24.782        | MM   | 0.9522      | 9416.44434  | 164.82524    | 51.2784 |

### Chiral HPLC chromatogram of 7ap

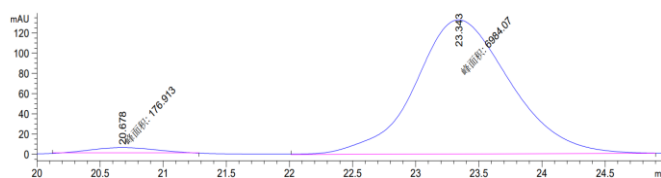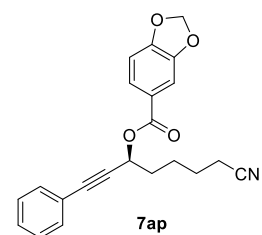

| Peak # | RetTime [min] | Type | Width [min] | Area mAU *s | Height [mAU] | Area %  |
|--------|---------------|------|-------------|-------------|--------------|---------|
| 1      | 20.678        | MM   | 0.5726      | 176.91281   | 5.14923      | 2.4705  |
| 2      | 23.343        | MM   | 0.8767      | 6984.07275  | 132.76654    | 97.5295 |

### Chiral HPLC chromatogram of racemic 7aq

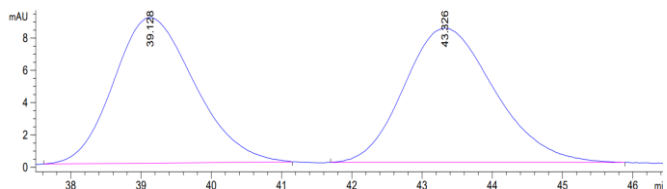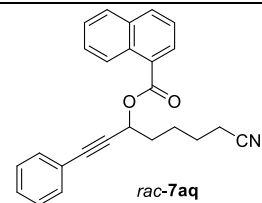

| Peak # | RetTime [min] | Type | Width [min] | Area mAU *s | Height [mAU] | Area %  |
|--------|---------------|------|-------------|-------------|--------------|---------|
| 1      | 39.128        | BB   | 0.9835      | 723.08197   | 9.01778      | 49.2531 |
| 2      | 43.326        | BB   | 1.0697      | 745.01105   | 8.31204      | 50.7469 |

### Chiral HPLC chromatogram of 7aq

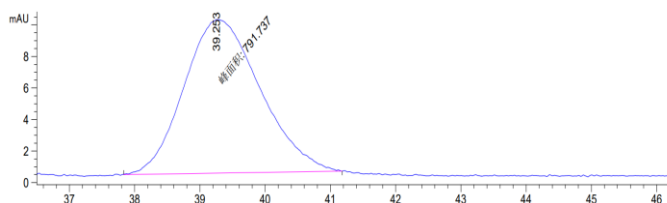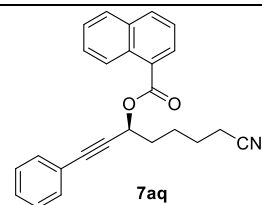

| Peak # | RetTime [min] | Type | Width [min] | Area mAU *s | Height [mAU] | Area %   |
|--------|---------------|------|-------------|-------------|--------------|----------|
| 1      | 39.253        | MM   | 1.3544      | 791.73676   | 9.74245      | 100.0000 |

### Chiral HPLC chromatogram of racemic 7ar

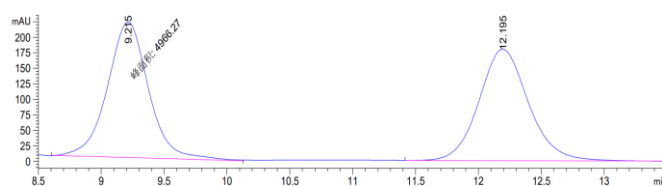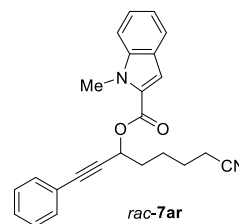

| Peak # | RetTime [min] | Type | Width [min] | Area mAU *s | Height [mAU] | Area %  |
|--------|---------------|------|-------------|-------------|--------------|---------|
| 1      | 9.215         | MM   | 0.3791      | 4966.26855  | 218.34009    | 50.1966 |
| 2      | 12.195        | BB   | 0.4178      | 4927.36523  | 179.76183    | 49.8034 |

### Chiral HPLC chromatogram of 7ar

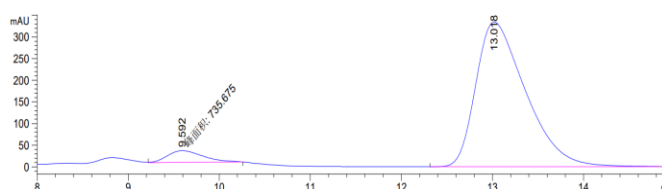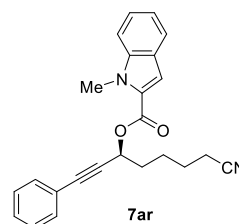

| Peak # | RetTime [min] | Type | Width [min] | Area mAU *s | Height [mAU] | Area %  |
|--------|---------------|------|-------------|-------------|--------------|---------|
| 1      | 9.592         | MM   | 0.4498      | 735.67480   | 27.26163     | 5.4643  |
| 2      | 13.018        | BB   | 0.5765      | 1.27277e4   | 334.03625    | 94.5357 |

### Chiral HPLC chromatogram of racemic 7as

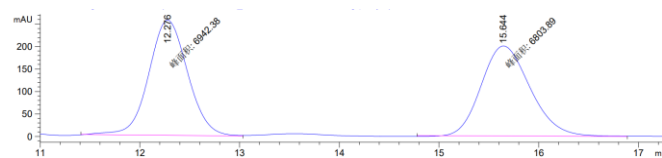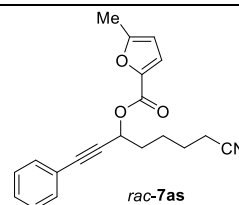

| Peak # | RetTime [min] | Type | Width [min] | Area mAU *s | Height [mAU] | Area %  |
|--------|---------------|------|-------------|-------------|--------------|---------|
| 1      | 12.276        | MM   | 0.4516      | 6942.37939  | 256.18973    | 50.5037 |
| 2      | 15.644        | MM   | 0.5668      | 6803.88965  | 200.06252    | 49.4963 |

### Chiral HPLC chromatogram of 7as

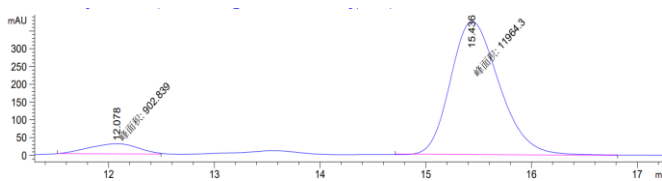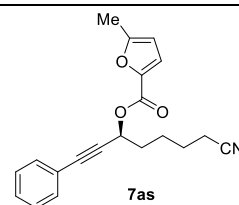

| Peak # | RetTime [min] | Type | Width [min] | Area mAU *s | Height [mAU] | Area %  |
|--------|---------------|------|-------------|-------------|--------------|---------|
| 1      | 12.078        | MM   | 0.5319      | 902.83875   | 28.29081     | 7.0166  |
| 2      | 15.436        | MM   | 0.5321      | 1.19643e4   | 374.72519    | 92.9834 |

### Chiral HPLC chromatogram of racemic 7at

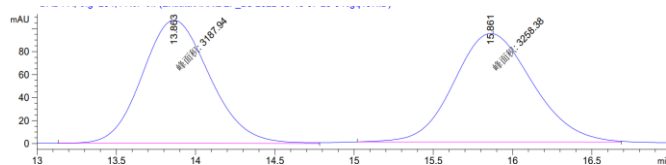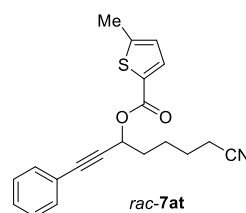

| Peak # | RetTime [min] | Type | Width [min] | Area mAU *s | Height [mAU] | Area %  |
|--------|---------------|------|-------------|-------------|--------------|---------|
| 1      | 13.863        | MM   | 0.4959      | 3187.93848  | 107.13504    | 49.4536 |
| 2      | 15.861        | MM   | 0.5755      | 3258.38452  | 94.35612     | 50.5464 |

### Chiral HPLC chromatogram of 7at

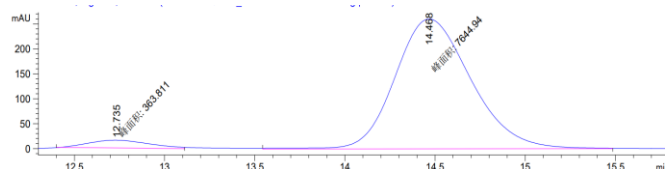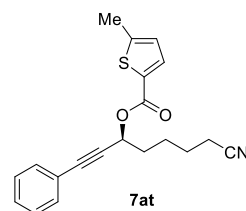

| Peak # | RetTime [min] | Type | Width [min] | Area mAU *s | Height [mAU] | Area %  |
|--------|---------------|------|-------------|-------------|--------------|---------|
| 1      | 12.735        | MM   | 0.3902      | 363.81088   | 15.54080     | 4.5427  |
| 2      | 14.468        | MM   | 0.4890      | 7644.94287  | 260.55466    | 95.4573 |

### Chiral HPLC chromatogram of racemic 8aa

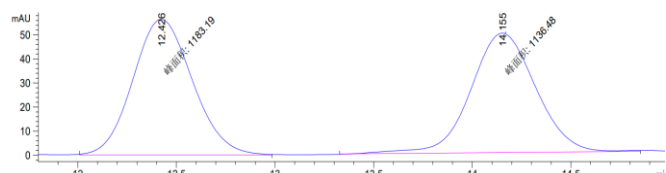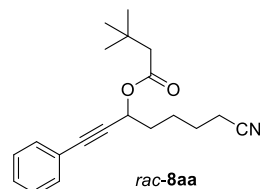

| Peak # | RetTime [min] | Type | Width [min] | Area mAU *s | Height [mAU] | Area %  |
|--------|---------------|------|-------------|-------------|--------------|---------|
| 1      | 12.426        | MM   | 0.3497      | 1183.19360  | 56.39409     | 51.0068 |
| 2      | 14.155        | MM   | 0.3817      | 1136.48376  | 49.62833     | 48.9932 |

### Chiral HPLC chromatogram of 8aa

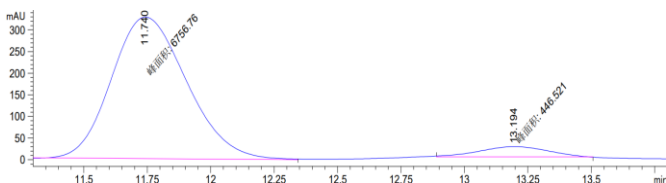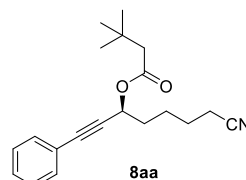

| Peak # | RetTime [min] | Type | Width [min] | Area mAU *s | Height [mAU] | Area %  |
|--------|---------------|------|-------------|-------------|--------------|---------|
| 1      | 11.740        | MM   | 0.3439      | 6756.75977  | 327.43231    | 93.8011 |
| 2      | 13.194        | MM   | 0.3141      | 446.52109   | 23.69547     | 6.1989  |

### Chiral HPLC chromatogram of racemic 8ab

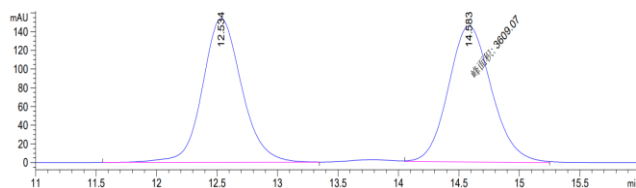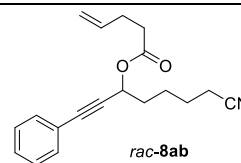

| Peak # | RetTime [min] | Type | Width [min] | Area mAU *s | Height [mAU] | Area %  |
|--------|---------------|------|-------------|-------------|--------------|---------|
| 1      | 12.534        | BB   | 0.3447      | 3459.84814  | 153.67183    | 48.9445 |
| 2      | 14.583        | MM   | 0.4135      | 3609.06934  | 145.47578    | 51.0555 |

### Chiral HPLC chromatogram of 8ab

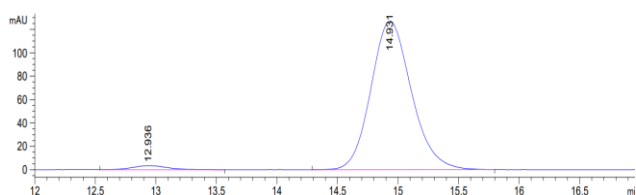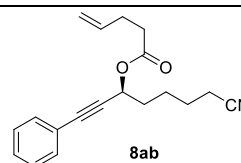

| Peak # | RetTime [min] | Type | Width [min] | Area mAU *s | Height [mAU] | Area %  |
|--------|---------------|------|-------------|-------------|--------------|---------|
| 1      | 12.936        | BB   | 0.2725      | 67.93878    | 3.37998      | 2.2541  |
| 2      | 14.931        | BB   | 0.3566      | 2946.12598  | 126.99804    | 97.7459 |

### Chiral HPLC chromatogram of racemic 8ac

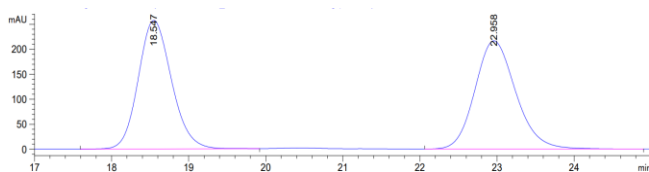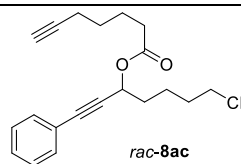

| Peak # | RetTime [min] | Type | Width [min] | Area mAU *s | Height [mAU] | Area %  |
|--------|---------------|------|-------------|-------------|--------------|---------|
| 1      | 18.547        | BB   | 0.4609      | 7687.93359  | 257.09119    | 49.1075 |
| 2      | 22.958        | BB   | 0.5632      | 7967.37744  | 216.57588    | 50.8925 |

### Chiral HPLC chromatogram of 8ac

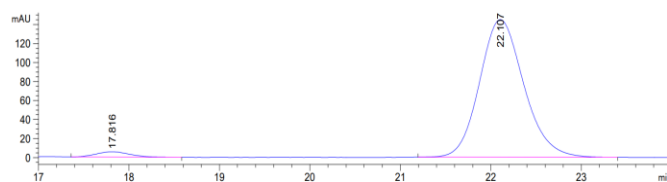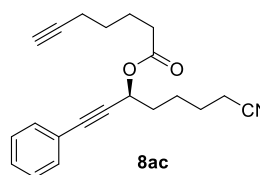

| Peak # | RetTime [min] | Type | Width [min] | Area mAU *s | Height [mAU] | Area %  |
|--------|---------------|------|-------------|-------------|--------------|---------|
| 1      | 17.816        | BB   | 0.3316      | 146.14143   | 5.61608      | 2.8823  |
| 2      | 22.107        | BB   | 0.5264      | 4924.20850  | 144.93526    | 97.1177 |

### Chiral HPLC chromatogram of racemic 8ad

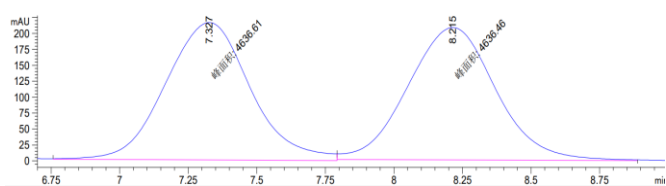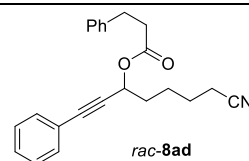

| Peak # | RetTime [min] | Type | Width [min] | Area mAU *s | Height [mAU] | Area %  |
|--------|---------------|------|-------------|-------------|--------------|---------|
| 1      | 7.327         | MM   | 0.3585      | 4636.60938  | 215.55452    | 50.0008 |
| 2      | 8.215         | MM   | 0.3719      | 4636.46045  | 207.77258    | 49.9992 |

### Chiral HPLC chromatogram of 8ad

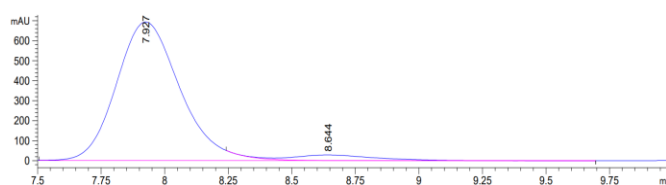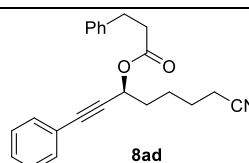

| Peak # | RetTime [min] | Type | Width [min] | Area mAU *s | Height [mAU] | Area %  |
|--------|---------------|------|-------------|-------------|--------------|---------|
| 1      | 7.927         | VV R | 0.2673      | 1.20724e4   | 692.95215    | 94.9988 |
| 2      | 8.644         | VB E | 0.3304      | 635.54791   | 27.82935     | 5.0012  |

### Chiral HPLC chromatogram of racemic 8ae

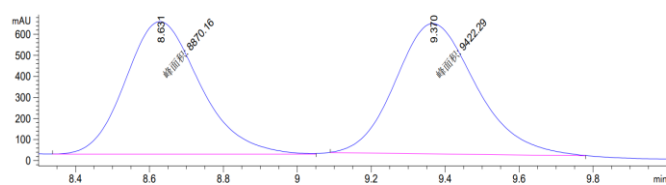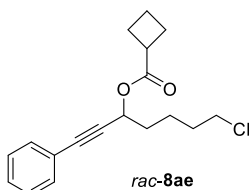

| Peak # | RetTime [min] | Type | Width [min] | Area mAU *s | Height [mAU] | Area %  |
|--------|---------------|------|-------------|-------------|--------------|---------|
| 1      | 8.631         | MM   | 0.2347      | 8870.16113  | 629.81329    | 48.4908 |
| 2      | 9.370         | MM   | 0.2534      | 9422.28613  | 619.62085    | 51.5092 |

### Chiral HPLC chromatogram of 8ae

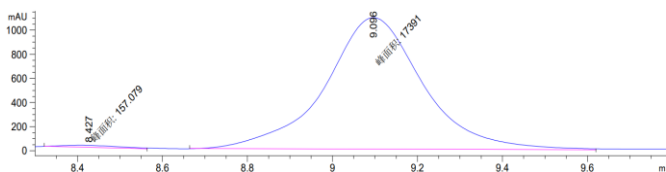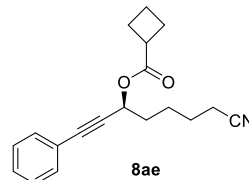

| Peak # | RetTime [min] | Type | Width [min] | Area mAU *s | Height [mAU] | Area %  |
|--------|---------------|------|-------------|-------------|--------------|---------|
| 1      | 8.427         | MM   | 0.1584      | 157.07950   | 16.53003     | 0.8951  |
| 2      | 9.096         | MM   | 0.2660      | 1.73910e4   | 1089.86670   | 99.1049 |

### Chiral HPLC chromatogram of racemic 8af

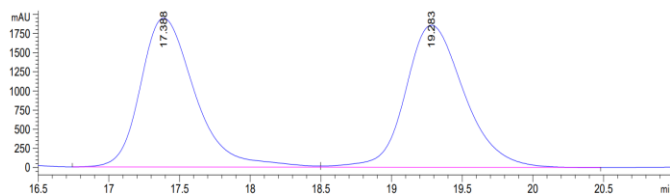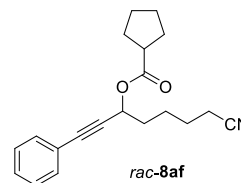

| Peak # | RetTime [min] | Type | Width [min] | Area mAU  | Area *s    | Height [mAU] | Area % |
|--------|---------------|------|-------------|-----------|------------|--------------|--------|
| 1      | 17.388        | BV   | 0.4099      | 5.19097e4 | 1941.71399 | 49.2249      |        |
| 2      | 19.283        | VB   | 0.4428      | 5.35444e4 | 1854.62769 | 50.7751      |        |

### Chiral HPLC chromatogram of 8af

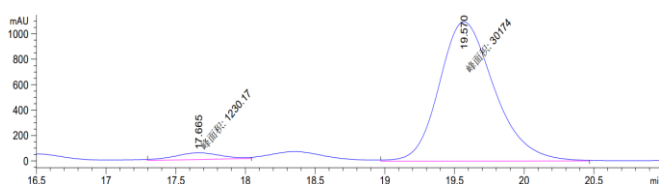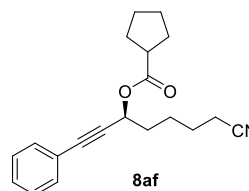

| Peak # | RetTime [min] | Type | Width [min] | Area mAU   | Area *s    | Height [mAU] | Area % |
|--------|---------------|------|-------------|------------|------------|--------------|--------|
| 1      | 17.665        | MM   | 0.3910      | 1230.17249 | 52.44139   | 3.9172       |        |
| 2      | 19.570        | MM   | 0.4586      | 3.01740e4  | 1096.54919 | 96.0828      |        |

### Chiral HPLC chromatogram of racemic 8ag

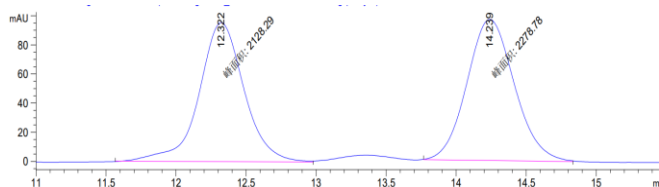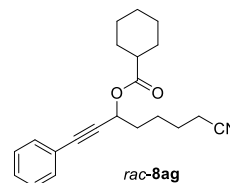

| Peak # | RetTime [min] | Type | Width [min] | Area mAU   | Area *s  | Height [mAU] | Area % |
|--------|---------------|------|-------------|------------|----------|--------------|--------|
| 1      | 12.322        | MM   | 0.3717      | 2128.29297 | 95.43626 | 48.2927      |        |
| 2      | 14.239        | MM   | 0.3919      | 2278.77881 | 96.92269 | 51.7073      |        |

### Chiral HPLC chromatogram of 8ag

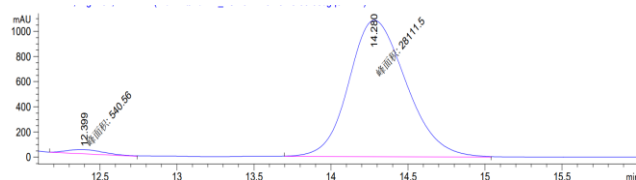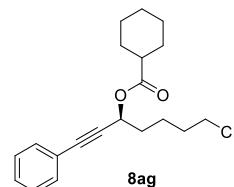

| Peak # | RetTime [min] | Type | Width [min] | Area mAU  | Area *s    | Height [mAU] | Area % |
|--------|---------------|------|-------------|-----------|------------|--------------|--------|
| 1      | 12.399        | MM   | 0.2713      | 540.56030 | 33.20974   | 1.8866       |        |
| 2      | 14.280        | MM   | 0.4323      | 2.81115e4 | 1083.74011 | 98.1134      |        |

### Chiral HPLC chromatogram of racemic 8ah

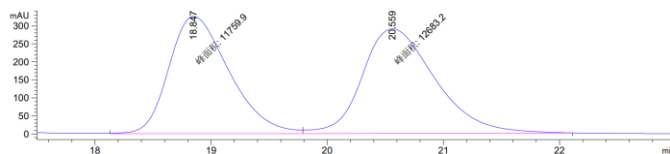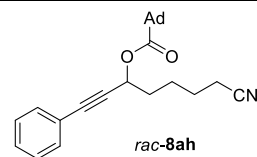

| Peak # | RetTime [min] | Type | Width [min] | Area mAU *s | Height [mAU] | Area %  |
|--------|---------------|------|-------------|-------------|--------------|---------|
| 1      | 18.847        | MM   | 0.6019      | 1.17599e4   | 325.62805    | 48.1113 |
| 2      | 20.559        | MM   | 0.7280      | 1.26832e4   | 290.38092    | 51.8887 |

### Chiral HPLC chromatogram of 8ah

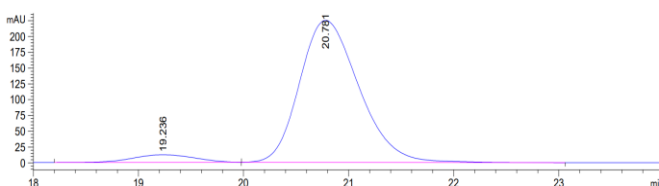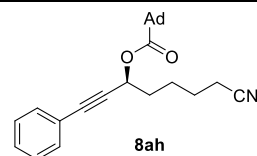

| Peak # | RetTime [min] | Type | Width [min] | Area mAU *s | Height [mAU] | Area %  |
|--------|---------------|------|-------------|-------------|--------------|---------|
| 1      | 19.236        | BB   | 0.6274      | 475.99701   | 11.78153     | 5.1378  |
| 2      | 20.781        | BB   | 0.6104      | 8788.65918  | 224.66734    | 94.8622 |

### Chiral HPLC chromatogram of racemic 8ai

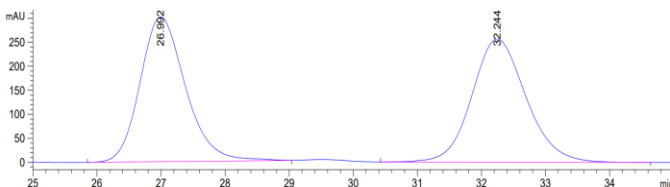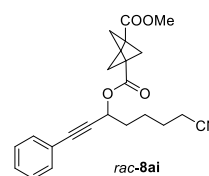

| Peak # | RetTime [min] | Type | Width [min] | Area mAU *s | Height [mAU] | Area %  |
|--------|---------------|------|-------------|-------------|--------------|---------|
| 1      | 26.992        | BB   | 0.7555      | 1.48022e4   | 301.13348    | 49.5401 |
| 2      | 32.244        | BB   | 0.9083      | 1.50770e4   | 256.29480    | 50.4599 |

### Chiral HPLC chromatogram of 8ai

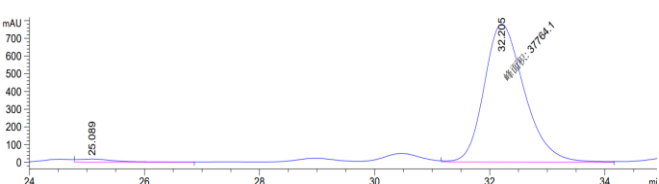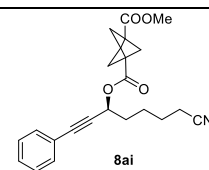

| Peak # | RetTime [min] | Type | Width [min] | Area mAU *s | Height [mAU] | Area %  |
|--------|---------------|------|-------------|-------------|--------------|---------|
| 1      | 25.089        | VB   | 0.6244      | 761.21735   | 17.46788     | 1.9759  |
| 2      | 32.205        | MM   | 0.8092      | 3.77641e4   | 777.83673    | 98.0241 |

### Chiral HPLC chromatogram of racemic 8aj

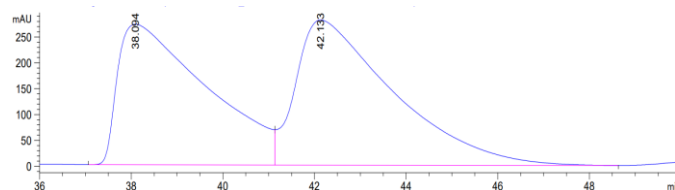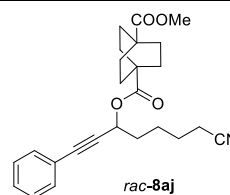

| Peak # | RetTime [min] | Type | Width [min] | Area mAU *s | Height [mAU] | Area %  |
|--------|---------------|------|-------------|-------------|--------------|---------|
| 1      | 38.094        | BV   | 1.8621      | 3.65659e4   | 271.70401    | 46.9454 |
| 2      | 42.133        | VB   | 1.9985      | 4.13245e4   | 280.54694    | 53.0546 |

### Chiral HPLC chromatogram of 8aj

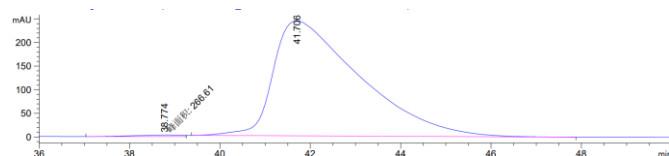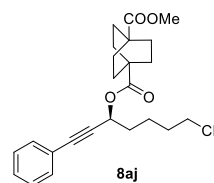

| Peak # | RetTime [min] | Type | Width [min] | Area mAU *s | Height [mAU] | Area %  |
|--------|---------------|------|-------------|-------------|--------------|---------|
| 1      | 38.774        | MM   | 1.3073      | 266.61023   | 3.39895      | 0.8164  |
| 2      | 41.706        | BB   | 1.8562      | 3.23909e4   | 243.76732    | 99.1836 |

### Chiral HPLC chromatogram of racemic 8ak

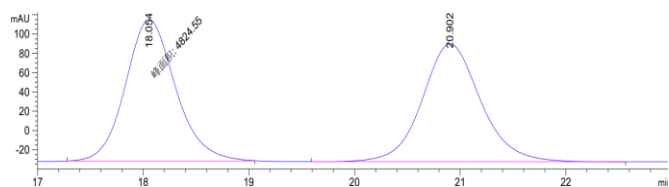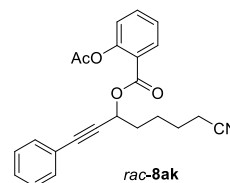

| Peak # | RetTime [min] | Type | Width [min] | Area mAU *s | Height [mAU] | Area %  |
|--------|---------------|------|-------------|-------------|--------------|---------|
| 1      | 18.054        | MM   | 0.5485      | 4824.55420  | 146.59010    | 50.6431 |
| 2      | 20.902        | BB   | 0.5872      | 4702.01660  | 122.12465    | 49.3569 |

### Chiral HPLC chromatogram of 8ak

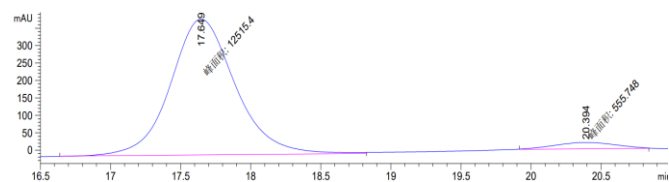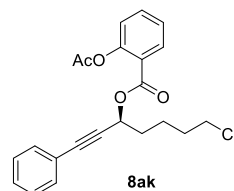

| Peak # | RetTime [min] | Type | Width [min] | Area mAU *s | Height [mAU] | Area %  |
|--------|---------------|------|-------------|-------------|--------------|---------|
| 1      | 17.649        | MM   | 0.5355      | 1.25154e4   | 389.52802    | 95.7483 |
| 2      | 20.394        | MM   | 0.5067      | 555.74762   | 18.27933     | 4.2517  |



### Chiral HPLC chromatogram of racemic 8al

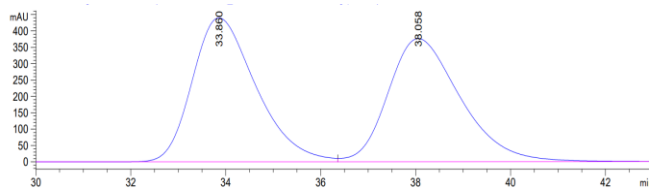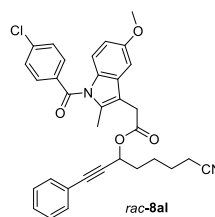

| Peak # | RetTime [min] | Type | Width [min] | Area mAU *s | Height [mAU] | Area %  |
|--------|---------------|------|-------------|-------------|--------------|---------|
| 1      | 33.860        | BV   | 1.4253      | 4.10386e4   | 439.52249    | 50.6983 |
| 2      | 38.058        | VBA  | 1.6213      | 3.99081e4   | 376.28818    | 49.3017 |

### Chiral HPLC chromatogram of 8al

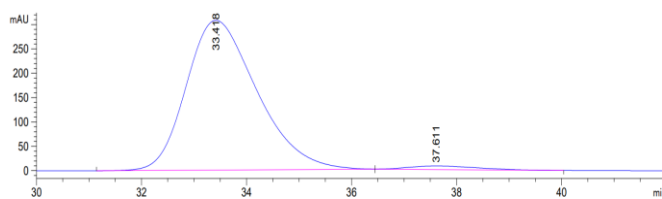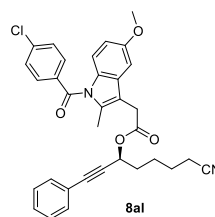

| Peak # | RetTime [min] | Type | Width [min] | Area mAU *s | Height [mAU] | Area %  |
|--------|---------------|------|-------------|-------------|--------------|---------|
| 1      | 33.418        | BB   | 1.4282      | 2.87295e4   | 307.43829    | 97.7558 |
| 2      | 37.611        | BB   | 1.1079      | 659.53448   | 7.21876      | 2.2442  |

### Chiral HPLC chromatogram of racemic 8am

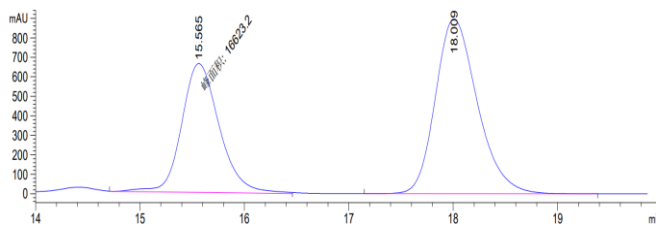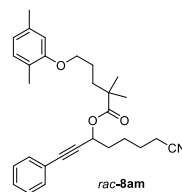

| Peak # | RetTime [min] | Type | Width [min] | Area mAU *s | Height [mAU] | Area %  |
|--------|---------------|------|-------------|-------------|--------------|---------|
| 1      | 15.565        | MM   | 0.4191      | 1.66232e4   | 661.09570    | 49.1716 |
| 2      | 18.009        | BB   | 0.4291      | 2.49698e4   | 896.16803    | 50.8284 |

### Chiral HPLC chromatogram of 8am

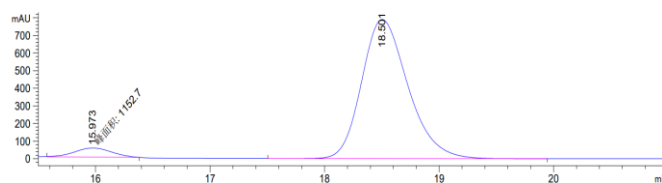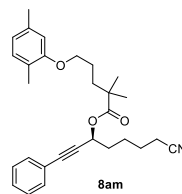

| Peak # | RetTime [min] | Type | Width [min] | Area mAU *s | Height [mAU] | Area %  |
|--------|---------------|------|-------------|-------------|--------------|---------|
| 1      | 15.973        | MM   | 0.3731      | 1152.70422  | 51.49614     | 4.9364  |
| 2      | 18.501        | BB   | 0.4320      | 2.21983e4   | 789.67834    | 95.0636 |
